# Supplementary material for: Identification of Potential Biomarkers for Breast Cancer Based on Salivary Metabolomics
Source: Research Square preprint supplement (doi:10.21203/rs.3.rs-6531859/v1), 2025-05-16
Supplement: Supplementary file 1 [file 1639eb33c58c2b58e517c977.xlsx]

## Sheet: A_vs_B+C+D
Query	Match	HMDB	PubChem	KEGG	Comment
C00270					0
C13747	Paraxanthine	HMDB0001860	4687	C13747	1
C07480	Theobromine	HMDB0002825	5429	C07480	1
C05021	N-Acetyl-b-D-galactosamine	HMDB0000853	440552	C05021	1
C00163	Propionic acid	HMDB0000237	1032	C00163	1
C00140	N-Acetyl-D-glucosamine	HMDB0000215	439174	C00140	1
C07130	Theophylline	HMDB0001889	2153	C07130	1
C00319	Sphingosine	HMDB0000252	5353955	C00319	1
C05235	Hydroxyacetone	HMDB0006961	8299	C05235	1
C11083	Imazamethabenz-methyl	HMDB0034913	21873022	C11083	1
C13875					0
C07605					0
C10312	Dantron	HMDB0029752	2950	C10312	1
D03795					0
C00550					0
C10028					0
C06162	Sanguinarine	HMDB0029367	5154	C06162	1
C00350					0
C00157					0
C00550					0
C08042	Nitrofurazone	HMDB0014480	5447130	C08042	1
