# Supplementary material for: Identification of Potential Biomarkers for Breast Cancer Based on Salivary Metabolomics
Source: Research Square preprint supplement (doi:10.21203/rs.3.rs-6531859/v1), 2025-05-16
Supplement: Supplementary file 2 [file 1840ee12060bb265f7ffeffd.xlsx]

## Sheet: NC_vs_BC
from	to	corr	value_from	value_to
Theobromine	1,7-Dimethylxanthine	1	-5.06491	-5.06491
Theophylline	1,7-Dimethylxanthine	1	-5.06491	-5.06491
1,7-Dimethylxanthine	Theobromine	1	-5.06491	-5.06491
Theophylline	Theobromine	1	-5.06491	-5.06491
1,7-Dimethylxanthine	Theophylline	1	-5.06491	-5.06491
Theobromine	Theophylline	1	-5.06491	-5.06491
2-Phenyl-1,3-thiazole-4-carboxylic acid	2-Bromo-5-(pyrrolidin-1-yl)pyrazine	0.859046	-0.398576	-0.487172
2-Bromo-5-(pyrrolidin-1-yl)pyrazine	2-Phenyl-1,3-thiazole-4-carboxylic acid	0.859046	-0.487172	-0.398576
3-(Methylsulfanyl)aniline	2-Aminonicotinic acid	0.851447	1.42859	2.12488
2-Aminonicotinic acid	3-(Methylsulfanyl)aniline	0.851447	2.12488	1.42859
6,8-Di-O-methylaverufin	2-Bromo-5-(pyrrolidin-1-yl)pyrazine	0.830872	-0.770893	-0.487172
2-Bromo-5-(pyrrolidin-1-yl)pyrazine	6,8-Di-O-methylaverufin	0.830872	-0.487172	-0.770893
6,8-Di-O-methylaverufin	2-Phenyl-1,3-thiazole-4-carboxylic acid	0.733715	-0.770893	-0.398576
2-Phenyl-1,3-thiazole-4-carboxylic acid	6,8-Di-O-methylaverufin	0.733715	-0.398576	-0.770893
Methyl 6-(acetyloxy)-1,3,7,11-tetrahydroxyabieta-8,11,13-trien-18-oate	3-Hydroxy-5-[2-(4-hydroxyphenyl)ethyl]phenyl .beta.-D-glucopyranoside	0.701101	1.93042	1.50183
3-Hydroxy-5-[2-(4-hydroxyphenyl)ethyl]phenyl .beta.-D-glucopyranoside	Methyl 6-(acetyloxy)-1,3,7,11-tetrahydroxyabieta-8,11,13-trien-18-oate	0.701101	1.50183	1.93042
PC(37:1)	N-Acetyl-D-galactosamine 4-sulfate	0.674294	1.98287	1.46548
N-Acetyl-D-galactosamine 4-sulfate	PC(37:1)	0.674294	1.46548	1.98287
Methyl 6-(acetyloxy)-1,3,7,11-tetrahydroxyabieta-8,11,13-trien-18-oate	2-Hydroxy-6-methyl-4-(trifluoromethyl)nicotinonitrile	0.662256	1.93042	0.661761
2-Hydroxy-6-methyl-4-(trifluoromethyl)nicotinonitrile	Methyl 6-(acetyloxy)-1,3,7,11-tetrahydroxyabieta-8,11,13-trien-18-oate	0.662256	0.661761	1.93042
Methyl 6-(acetyloxy)-1,3,7,11-tetrahydroxyabieta-8,11,13-trien-18-oate	2-Methyl-3-hydroxybutyric acid	0.646973	1.93042	0.711157
2-Methyl-3-hydroxybutyric acid	Methyl 6-(acetyloxy)-1,3,7,11-tetrahydroxyabieta-8,11,13-trien-18-oate	0.646973	0.711157	1.93042
N-Acetyl-D-galactosamine 4-sulfate	Methyl 6-(acetyloxy)-1,3,7,11-tetrahydroxyabieta-8,11,13-trien-18-oate	0.646888	1.46548	1.93042
Methyl 6-(acetyloxy)-1,3,7,11-tetrahydroxyabieta-8,11,13-trien-18-oate	N-Acetyl-D-galactosamine 4-sulfate	0.646888	1.93042	1.46548
2,2'-Bipyridine-4,4'-dicarboxylic acid	2-Hydroxy-6-methyl-4-(trifluoromethyl)nicotinonitrile	-0.626313	-0.246837	0.661761
2-Hydroxy-6-methyl-4-(trifluoromethyl)nicotinonitrile	2,2'-Bipyridine-4,4'-dicarboxylic acid	-0.626313	0.661761	-0.246837
Indolylmethyl-desulfoglucosinolate	3-Hydroxy-5-[2-(4-hydroxyphenyl)ethyl]phenyl .beta.-D-glucopyranoside	0.623581	1.00081	1.50183
3-Hydroxy-5-[2-(4-hydroxyphenyl)ethyl]phenyl .beta.-D-glucopyranoside	Indolylmethyl-desulfoglucosinolate	0.623581	1.50183	1.00081
3-Hydroxy-5-[2-(4-hydroxyphenyl)ethyl]phenyl .beta.-D-glucopyranoside	2-Hydroxy-6-methyl-4-(trifluoromethyl)nicotinonitrile	0.616324	1.50183	0.661761
2-Hydroxy-6-methyl-4-(trifluoromethyl)nicotinonitrile	3-Hydroxy-5-[2-(4-hydroxyphenyl)ethyl]phenyl .beta.-D-glucopyranoside	0.616324	0.661761	1.50183
3-Hydroxy-5-[2-(4-hydroxyphenyl)ethyl]phenyl .beta.-D-glucopyranoside	2-Aminonicotinic acid	0.597883	1.50183	2.12488
2-Aminonicotinic acid	3-Hydroxy-5-[2-(4-hydroxyphenyl)ethyl]phenyl .beta.-D-glucopyranoside	0.597883	2.12488	1.50183
2-Methyl-3-hydroxybutyric acid	2-Hydroxy-6-methyl-4-(trifluoromethyl)nicotinonitrile	0.595748	0.711157	0.661761
2-Hydroxy-6-methyl-4-(trifluoromethyl)nicotinonitrile	2-Methyl-3-hydroxybutyric acid	0.595748	0.661761	0.711157
N-Acetyl-D-galactosamine 4-sulfate	2-Hydroxy-6-methyl-4-(trifluoromethyl)nicotinonitrile	0.55639	1.46548	0.661761
2-Hydroxy-6-methyl-4-(trifluoromethyl)nicotinonitrile	N-Acetyl-D-galactosamine 4-sulfate	0.55639	0.661761	1.46548
Methyl 6-(acetyloxy)-1,3,7,11-tetrahydroxyabieta-8,11,13-trien-18-oate	Indolylmethyl-desulfoglucosinolate	0.552634	1.93042	1.00081
Indolylmethyl-desulfoglucosinolate	Methyl 6-(acetyloxy)-1,3,7,11-tetrahydroxyabieta-8,11,13-trien-18-oate	0.552634	1.00081	1.93042
PC(37:1)	Methyl 6-(acetyloxy)-1,3,7,11-tetrahydroxyabieta-8,11,13-trien-18-oate	0.543072	1.98287	1.93042
Methyl 6-(acetyloxy)-1,3,7,11-tetrahydroxyabieta-8,11,13-trien-18-oate	PC(37:1)	0.543072	1.93042	1.98287
N-Acetyl-D-galactosamine 4-sulfate	3-Hydroxy-5-[2-(4-hydroxyphenyl)ethyl]phenyl .beta.-D-glucopyranoside	0.540937	1.46548	1.50183
3-Hydroxy-5-[2-(4-hydroxyphenyl)ethyl]phenyl .beta.-D-glucopyranoside	N-Acetyl-D-galactosamine 4-sulfate	0.540937	1.50183	1.46548
3.beta.,7.alpha.-Dihydroxy-5-cholestenoic acid	3-Hydroxyhept-4-enoylcarnitine	0.535986	-0.343605	-0.314072
3-Hydroxyhept-4-enoylcarnitine	3.beta.,7.alpha.-Dihydroxy-5-cholestenoic acid	0.535986	-0.314072	-0.343605
6,8-Di-O-methylaverufin	2,2'-Bipyridine-4,4'-dicarboxylic acid	0.531546	-0.770893	-0.246837
2,2'-Bipyridine-4,4'-dicarboxylic acid	6,8-Di-O-methylaverufin	0.531546	-0.246837	-0.770893
Methyl 6-(acetyloxy)-1,3,7,11-tetrahydroxyabieta-8,11,13-trien-18-oate	2-Aminonicotinic acid	0.518057	1.93042	2.12488
2-Aminonicotinic acid	Methyl 6-(acetyloxy)-1,3,7,11-tetrahydroxyabieta-8,11,13-trien-18-oate	0.518057	2.12488	1.93042
PC(37:1)	3-Hydroxy-5-[2-(4-hydroxyphenyl)ethyl]phenyl .beta.-D-glucopyranoside	0.492957	1.98287	1.50183
3-Hydroxy-5-[2-(4-hydroxyphenyl)ethyl]phenyl .beta.-D-glucopyranoside	PC(37:1)	0.492957	1.50183	1.98287
N-Acetyl-D-galactosamine 4-sulfate	2-Methyl-3-hydroxybutyric acid	0.487407	1.46548	0.711157
2-Methyl-3-hydroxybutyric acid	N-Acetyl-D-galactosamine 4-sulfate	0.487407	0.711157	1.46548
3-Hydroxy-5-[2-(4-hydroxyphenyl)ethyl]phenyl .beta.-D-glucopyranoside	3-(Methylsulfanyl)aniline	0.473491	1.50183	1.42859
3-(Methylsulfanyl)aniline	3-Hydroxy-5-[2-(4-hydroxyphenyl)ethyl]phenyl .beta.-D-glucopyranoside	0.473491	1.42859	1.50183
N-Acetyl-D-galactosamine 4-sulfate	2,2'-Bipyridine-4,4'-dicarboxylic acid	-0.471954	1.46548	-0.246837
2,2'-Bipyridine-4,4'-dicarboxylic acid	N-Acetyl-D-galactosamine 4-sulfate	-0.471954	-0.246837	1.46548
PC(37:1)	2-Hydroxy-6-methyl-4-(trifluoromethyl)nicotinonitrile	0.4711	1.98287	0.661761
2-Hydroxy-6-methyl-4-(trifluoromethyl)nicotinonitrile	PC(37:1)	0.4711	0.661761	1.98287
2-Methyl-3-hydroxybutyric acid	2-Aminonicotinic acid	0.455135	0.711157	2.12488
2-Aminonicotinic acid	2-Methyl-3-hydroxybutyric acid	0.455135	2.12488	0.711157
N-Acetyl-D-galactosamine 4-sulfate	Indolylmethyl-desulfoglucosinolate	0.44378	1.46548	1.00081
Indolylmethyl-desulfoglucosinolate	N-Acetyl-D-galactosamine 4-sulfate	0.44378	1.00081	1.46548
N-Acetyl-D-galactosamine 4-sulfate	3.beta.,7.alpha.-Dihydroxy-5-cholestenoic acid	-0.437207	1.46548	-0.343605
3.beta.,7.alpha.-Dihydroxy-5-cholestenoic acid	N-Acetyl-D-galactosamine 4-sulfate	-0.437207	-0.343605	1.46548
N-Acetyl-D-galactosamine 4-sulfate	2-Aminonicotinic acid	0.437121	1.46548	2.12488
2-Aminonicotinic acid	N-Acetyl-D-galactosamine 4-sulfate	0.437121	2.12488	1.46548
N-Acetyl-D-galactosamine 4-sulfate	Frangulin B	-0.432682	1.46548	-0.716607
Frangulin B	N-Acetyl-D-galactosamine 4-sulfate	-0.432682	-0.716607	1.46548
Indolylmethyl-desulfoglucosinolate	2-Hydroxy-6-methyl-4-(trifluoromethyl)nicotinonitrile	0.415094	1.00081	0.661761
2-Hydroxy-6-methyl-4-(trifluoromethyl)nicotinonitrile	Indolylmethyl-desulfoglucosinolate	0.415094	0.661761	1.00081
2,2'-Bipyridine-4,4'-dicarboxylic acid	2-Methyl-3-hydroxybutyric acid	-0.410313	-0.246837	0.711157
2-Methyl-3-hydroxybutyric acid	2,2'-Bipyridine-4,4'-dicarboxylic acid	-0.410313	0.711157	-0.246837
Methyl 6-(acetyloxy)-1,3,7,11-tetrahydroxyabieta-8,11,13-trien-18-oate	3-(Methylsulfanyl)aniline	0.408094	1.93042	1.42859
3-(Methylsulfanyl)aniline	Methyl 6-(acetyloxy)-1,3,7,11-tetrahydroxyabieta-8,11,13-trien-18-oate	0.408094	1.42859	1.93042
2-Hydroxy-6-methyl-4-(trifluoromethyl)nicotinonitrile	2-Aminonicotinic acid	0.403996	0.661761	2.12488
2-Aminonicotinic acid	2-Hydroxy-6-methyl-4-(trifluoromethyl)nicotinonitrile	0.403996	2.12488	0.661761
PC(37:1)	2,2'-Bipyridine-4,4'-dicarboxylic acid	-0.391189	1.98287	-0.246837
2,2'-Bipyridine-4,4'-dicarboxylic acid	PC(37:1)	-0.391189	-0.246837	1.98287
PC(37:1)	Frangulin B	-0.388628	1.98287	-0.716607
Frangulin B	PC(37:1)	-0.388628	-0.716607	1.98287
PC(37:1)	2-Aminonicotinic acid	0.383932	1.98287	2.12488
2-Aminonicotinic acid	PC(37:1)	0.383932	2.12488	1.98287
PC(37:1)	Indolylmethyl-desulfoglucosinolate	0.378639	1.98287	1.00081
Indolylmethyl-desulfoglucosinolate	PC(37:1)	0.378639	1.00081	1.98287
Methyl 6-(acetyloxy)-1,3,7,11-tetrahydroxyabieta-8,11,13-trien-18-oate	3.beta.,7.alpha.-Dihydroxy-5-cholestenoic acid	-0.376163	1.93042	-0.343605
3.beta.,7.alpha.-Dihydroxy-5-cholestenoic acid	Methyl 6-(acetyloxy)-1,3,7,11-tetrahydroxyabieta-8,11,13-trien-18-oate	-0.376163	-0.343605	1.93042
3-(Methylsulfanyl)aniline	2,2'-Bipyridine-4,4'-dicarboxylic acid	-0.364979	1.42859	-0.246837
2,2'-Bipyridine-4,4'-dicarboxylic acid	3-(Methylsulfanyl)aniline	-0.364979	-0.246837	1.42859
Frangulin B	2-Hydroxy-6-methyl-4-(trifluoromethyl)nicotinonitrile	-0.364467	-0.716607	0.661761
2-Hydroxy-6-methyl-4-(trifluoromethyl)nicotinonitrile	Frangulin B	-0.364467	0.661761	-0.716607
3.beta.,7.alpha.-Dihydroxy-5-cholestenoic acid	2-Hydroxy-6-methyl-4-(trifluoromethyl)nicotinonitrile	-0.357637	-0.343605	0.661761
2-Hydroxy-6-methyl-4-(trifluoromethyl)nicotinonitrile	3.beta.,7.alpha.-Dihydroxy-5-cholestenoic acid	-0.357637	0.661761	-0.343605
6,8-Di-O-methylaverufin	2-Hydroxy-6-methyl-4-(trifluoromethyl)nicotinonitrile	-0.356356	-0.770893	0.661761
2-Hydroxy-6-methyl-4-(trifluoromethyl)nicotinonitrile	6,8-Di-O-methylaverufin	-0.356356	0.661761	-0.770893
3.beta.,7.alpha.-Dihydroxy-5-cholestenoic acid	2,2'-Bipyridine-4,4'-dicarboxylic acid	0.351917	-0.343605	-0.246837
2,2'-Bipyridine-4,4'-dicarboxylic acid	3.beta.,7.alpha.-Dihydroxy-5-cholestenoic acid	0.351917	-0.246837	-0.343605
6,8-Di-O-methylaverufin	1,7-Dimethylxanthine	0.349099	-0.770893	-5.06491
1,7-Dimethylxanthine	6,8-Di-O-methylaverufin	0.349099	-5.06491	-0.770893
Theobromine	6,8-Di-O-methylaverufin	0.349099	-5.06491	-0.770893
Theophylline	6,8-Di-O-methylaverufin	0.349099	-5.06491	-0.770893
6,8-Di-O-methylaverufin	Theobromine	0.349099	-0.770893	-5.06491
6,8-Di-O-methylaverufin	Theophylline	0.349099	-0.770893	-5.06491
2,2'-Bipyridine-4,4'-dicarboxylic acid	2-Bromo-5-(pyrrolidin-1-yl)pyrazine	0.346965	-0.246837	-0.487172
2-Bromo-5-(pyrrolidin-1-yl)pyrazine	2,2'-Bipyridine-4,4'-dicarboxylic acid	0.346965	-0.487172	-0.246837
Methyl 6-(acetyloxy)-1,3,7,11-tetrahydroxyabieta-8,11,13-trien-18-oate	2,2'-Bipyridine-4,4'-dicarboxylic acid	-0.343123	1.93042	-0.246837
2,2'-Bipyridine-4,4'-dicarboxylic acid	Methyl 6-(acetyloxy)-1,3,7,11-tetrahydroxyabieta-8,11,13-trien-18-oate	-0.343123	-0.246837	1.93042
S-(4-Fluorophenyl)mercapturic acid	3-Hydroxyhept-4-enoylcarnitine	-0.341501	0.311849	-0.314072
3-Hydroxyhept-4-enoylcarnitine	S-(4-Fluorophenyl)mercapturic acid	-0.341501	-0.314072	0.311849
S-(4-Fluorophenyl)mercapturic acid	2-Methyl-3-hydroxybutyric acid	-0.341074	0.311849	0.711157
2-Methyl-3-hydroxybutyric acid	S-(4-Fluorophenyl)mercapturic acid	-0.341074	0.711157	0.311849
S-(4-Fluorophenyl)mercapturic acid	6,8-Di-O-methylaverufin	-0.340391	0.311849	-0.770893
6,8-Di-O-methylaverufin	S-(4-Fluorophenyl)mercapturic acid	-0.340391	-0.770893	0.311849
S-(4-Fluorophenyl)mercapturic acid	2-Hydroxy-6-methyl-4-(trifluoromethyl)nicotinonitrile	-0.338769	0.311849	0.661761
2-Hydroxy-6-methyl-4-(trifluoromethyl)nicotinonitrile	S-(4-Fluorophenyl)mercapturic acid	-0.338769	0.661761	0.311849
Indolylmethyl-desulfoglucosinolate	1,7-Dimethylxanthine	-0.335952	1.00081	-5.06491
1,7-Dimethylxanthine	Indolylmethyl-desulfoglucosinolate	-0.335952	-5.06491	1.00081
Theobromine	Indolylmethyl-desulfoglucosinolate	-0.335952	-5.06491	1.00081
Theophylline	Indolylmethyl-desulfoglucosinolate	-0.335952	-5.06491	1.00081
Indolylmethyl-desulfoglucosinolate	Theobromine	-0.335952	1.00081	-5.06491
Indolylmethyl-desulfoglucosinolate	Theophylline	-0.335952	1.00081	-5.06491
N-Acetyl-D-galactosamine 4-sulfate	1,7-Dimethylxanthine	-0.333476	1.46548	-5.06491
1,7-Dimethylxanthine	N-Acetyl-D-galactosamine 4-sulfate	-0.333476	-5.06491	1.46548
Theobromine	N-Acetyl-D-galactosamine 4-sulfate	-0.333476	-5.06491	1.46548
Theophylline	N-Acetyl-D-galactosamine 4-sulfate	-0.333476	-5.06491	1.46548
N-Acetyl-D-galactosamine 4-sulfate	Theobromine	-0.333476	1.46548	-5.06491
N-Acetyl-D-galactosamine 4-sulfate	Theophylline	-0.333476	1.46548	-5.06491
3-Hydroxy-5-[2-(4-hydroxyphenyl)ethyl]phenyl .beta.-D-glucopyranoside	2,2'-Bipyridine-4,4'-dicarboxylic acid	-0.32767	1.50183	-0.246837
2,2'-Bipyridine-4,4'-dicarboxylic acid	3-Hydroxy-5-[2-(4-hydroxyphenyl)ethyl]phenyl .beta.-D-glucopyranoside	-0.32767	-0.246837	1.50183
2,2'-Bipyridine-4,4'-dicarboxylic acid	2-Aminonicotinic acid	-0.324255	-0.246837	2.12488
2-Aminonicotinic acid	2,2'-Bipyridine-4,4'-dicarboxylic acid	-0.324255	2.12488	-0.246837
3-Hydroxy-5-[2-(4-hydroxyphenyl)ethyl]phenyl .beta.-D-glucopyranoside	2-Methyl-3-hydroxybutyric acid	0.324084	1.50183	0.711157
2-Methyl-3-hydroxybutyric acid	3-Hydroxy-5-[2-(4-hydroxyphenyl)ethyl]phenyl .beta.-D-glucopyranoside	0.324084	0.711157	1.50183
N-Acetyl-D-galactosamine 4-sulfate	3-(Methylsulfanyl)aniline	0.320242	1.46548	1.42859
3-(Methylsulfanyl)aniline	N-Acetyl-D-galactosamine 4-sulfate	0.320242	1.42859	1.46548
PC(37:1)	3.beta.,7.alpha.-Dihydroxy-5-cholestenoic acid	-0.318364	1.98287	-0.343605
3.beta.,7.alpha.-Dihydroxy-5-cholestenoic acid	PC(37:1)	-0.318364	-0.343605	1.98287
2,2'-Bipyridine-4,4'-dicarboxylic acid	2-Phenyl-1,3-thiazole-4-carboxylic acid	0.313071	-0.246837	-0.398576
2-Phenyl-1,3-thiazole-4-carboxylic acid	2,2'-Bipyridine-4,4'-dicarboxylic acid	0.313071	-0.398576	-0.246837
6,8-Di-O-methylaverufin	3-Hydroxy-5-[2-(4-hydroxyphenyl)ethyl]phenyl .beta.-D-glucopyranoside	-0.310424	-0.770893	1.50183
3-Hydroxy-5-[2-(4-hydroxyphenyl)ethyl]phenyl .beta.-D-glucopyranoside	6,8-Di-O-methylaverufin	-0.310424	1.50183	-0.770893
3-(Methylsulfanyl)aniline	2-Hydroxy-6-methyl-4-(trifluoromethyl)nicotinonitrile	0.297106	1.42859	0.661761
2-Hydroxy-6-methyl-4-(trifluoromethyl)nicotinonitrile	3-(Methylsulfanyl)aniline	0.297106	0.661761	1.42859
3-(Methylsulfanyl)aniline	2-Methyl-3-hydroxybutyric acid	0.293605	1.42859	0.711157
2-Methyl-3-hydroxybutyric acid	3-(Methylsulfanyl)aniline	0.293605	0.711157	1.42859
2-Hydroxy-6-methyl-4-(trifluoromethyl)nicotinonitrile	1,7-Dimethylxanthine	-0.292666	0.661761	-5.06491
1,7-Dimethylxanthine	2-Hydroxy-6-methyl-4-(trifluoromethyl)nicotinonitrile	-0.292666	-5.06491	0.661761
Theobromine	2-Hydroxy-6-methyl-4-(trifluoromethyl)nicotinonitrile	-0.292666	-5.06491	0.661761
Theophylline	2-Hydroxy-6-methyl-4-(trifluoromethyl)nicotinonitrile	-0.292666	-5.06491	0.661761
2-Hydroxy-6-methyl-4-(trifluoromethyl)nicotinonitrile	Theobromine	-0.292666	0.661761	-5.06491
2-Hydroxy-6-methyl-4-(trifluoromethyl)nicotinonitrile	Theophylline	-0.292666	0.661761	-5.06491
Frangulin B	2,2'-Bipyridine-4,4'-dicarboxylic acid	0.292239	-0.716607	-0.246837
2,2'-Bipyridine-4,4'-dicarboxylic acid	Frangulin B	0.292239	-0.246837	-0.716607
2,2'-Bipyridine-4,4'-dicarboxylic acid	1,7-Dimethylxanthine	0.289507	-0.246837	-5.06491
1,7-Dimethylxanthine	2,2'-Bipyridine-4,4'-dicarboxylic acid	0.289507	-5.06491	-0.246837
Theobromine	2,2'-Bipyridine-4,4'-dicarboxylic acid	0.289507	-5.06491	-0.246837
Theophylline	2,2'-Bipyridine-4,4'-dicarboxylic acid	0.289507	-5.06491	-0.246837
2,2'-Bipyridine-4,4'-dicarboxylic acid	Theobromine	0.289507	-0.246837	-5.06491
2,2'-Bipyridine-4,4'-dicarboxylic acid	Theophylline	0.289507	-0.246837	-5.06491
3-Hydroxyhept-4-enoylcarnitine	2,2'-Bipyridine-4,4'-dicarboxylic acid	0.287629	-0.314072	-0.246837
2,2'-Bipyridine-4,4'-dicarboxylic acid	3-Hydroxyhept-4-enoylcarnitine	0.287629	-0.246837	-0.314072
PC(37:1)	2-Methyl-3-hydroxybutyric acid	0.28669	1.98287	0.711157
2-Methyl-3-hydroxybutyric acid	PC(37:1)	0.28669	0.711157	1.98287
3.beta.,7.alpha.-Dihydroxy-5-cholestenoic acid	2-Methyl-3-hydroxybutyric acid	-0.280031	-0.343605	0.711157
2-Methyl-3-hydroxybutyric acid	3.beta.,7.alpha.-Dihydroxy-5-cholestenoic acid	-0.280031	0.711157	-0.343605
2-Aminonicotinic acid	1,7-Dimethylxanthine	-0.277043	2.12488	-5.06491
1,7-Dimethylxanthine	2-Aminonicotinic acid	-0.277043	-5.06491	2.12488
Theobromine	2-Aminonicotinic acid	-0.277043	-5.06491	2.12488
Theophylline	2-Aminonicotinic acid	-0.277043	-5.06491	2.12488
2-Aminonicotinic acid	Theobromine	-0.277043	2.12488	-5.06491
2-Aminonicotinic acid	Theophylline	-0.277043	2.12488	-5.06491
Indolylmethyl-desulfoglucosinolate	Frangulin B	-0.264407	1.00081	-0.716607
Frangulin B	Indolylmethyl-desulfoglucosinolate	-0.264407	-0.716607	1.00081
PC(37:1)	3-(Methylsulfanyl)aniline	0.261846	1.98287	1.42859
3-(Methylsulfanyl)aniline	PC(37:1)	0.261846	1.42859	1.98287
PC(37:1)	2-Phenyl-1,3-thiazole-4-carboxylic acid	0.260394	1.98287	-0.398576
2-Phenyl-1,3-thiazole-4-carboxylic acid	PC(37:1)	0.260394	-0.398576	1.98287
PC(37:1)	1,7-Dimethylxanthine	-0.257919	1.98287	-5.06491
1,7-Dimethylxanthine	PC(37:1)	-0.257919	-5.06491	1.98287
Theobromine	PC(37:1)	-0.257919	-5.06491	1.98287
Theophylline	PC(37:1)	-0.257919	-5.06491	1.98287
PC(37:1)	Theobromine	-0.257919	1.98287	-5.06491
PC(37:1)	Theophylline	-0.257919	1.98287	-5.06491
Indolylmethyl-desulfoglucosinolate	2-Aminonicotinic acid	0.252796	1.00081	2.12488
2-Aminonicotinic acid	Indolylmethyl-desulfoglucosinolate	0.252796	2.12488	1.00081
2-Bromo-5-(pyrrolidin-1-yl)pyrazine	1,7-Dimethylxanthine	0.250662	-0.487172	-5.06491
1,7-Dimethylxanthine	2-Bromo-5-(pyrrolidin-1-yl)pyrazine	0.250662	-5.06491	-0.487172
Theobromine	2-Bromo-5-(pyrrolidin-1-yl)pyrazine	0.250662	-5.06491	-0.487172
Theophylline	2-Bromo-5-(pyrrolidin-1-yl)pyrazine	0.250662	-5.06491	-0.487172
N-Acetyl-D-galactosamine 4-sulfate	3-Hydroxyhept-4-enoylcarnitine	-0.250662	1.46548	-0.314072
3-Hydroxyhept-4-enoylcarnitine	N-Acetyl-D-galactosamine 4-sulfate	-0.250662	-0.314072	1.46548
2-Bromo-5-(pyrrolidin-1-yl)pyrazine	Theobromine	0.250662	-0.487172	-5.06491
2-Bromo-5-(pyrrolidin-1-yl)pyrazine	Theophylline	0.250662	-0.487172	-5.06491
N-Acetyl-D-galactosamine 4-sulfate	6,8-Di-O-methylaverufin	-0.249381	1.46548	-0.770893
6,8-Di-O-methylaverufin	N-Acetyl-D-galactosamine 4-sulfate	-0.249381	-0.770893	1.46548
Indolylmethyl-desulfoglucosinolate	2,2'-Bipyridine-4,4'-dicarboxylic acid	-0.247503	1.00081	-0.246837
2,2'-Bipyridine-4,4'-dicarboxylic acid	Indolylmethyl-desulfoglucosinolate	-0.247503	-0.246837	1.00081
Indolylmethyl-desulfoglucosinolate	2-Methyl-3-hydroxybutyric acid	0.241697	1.00081	0.711157
2-Methyl-3-hydroxybutyric acid	Indolylmethyl-desulfoglucosinolate	0.241697	0.711157	1.00081
3-Hydroxy-5-[2-(4-hydroxyphenyl)ethyl]phenyl .beta.-D-glucopyranoside	1,7-Dimethylxanthine	-0.239392	1.50183	-5.06491
1,7-Dimethylxanthine	3-Hydroxy-5-[2-(4-hydroxyphenyl)ethyl]phenyl .beta.-D-glucopyranoside	-0.239392	-5.06491	1.50183
Theobromine	3-Hydroxy-5-[2-(4-hydroxyphenyl)ethyl]phenyl .beta.-D-glucopyranoside	-0.239392	-5.06491	1.50183
Theophylline	3-Hydroxy-5-[2-(4-hydroxyphenyl)ethyl]phenyl .beta.-D-glucopyranoside	-0.239392	-5.06491	1.50183
3-Hydroxy-5-[2-(4-hydroxyphenyl)ethyl]phenyl .beta.-D-glucopyranoside	Theobromine	-0.239392	1.50183	-5.06491
3-Hydroxy-5-[2-(4-hydroxyphenyl)ethyl]phenyl .beta.-D-glucopyranoside	Theophylline	-0.239392	1.50183	-5.06491
Methyl 6-(acetyloxy)-1,3,7,11-tetrahydroxyabieta-8,11,13-trien-18-oate	Frangulin B	-0.231281	1.93042	-0.716607
Frangulin B	Methyl 6-(acetyloxy)-1,3,7,11-tetrahydroxyabieta-8,11,13-trien-18-oate	-0.231281	-0.716607	1.93042
3.beta.,7.alpha.-Dihydroxy-5-cholestenoic acid	1,7-Dimethylxanthine	0.231196	-0.343605	-5.06491
1,7-Dimethylxanthine	3.beta.,7.alpha.-Dihydroxy-5-cholestenoic acid	0.231196	-5.06491	-0.343605
Theobromine	3.beta.,7.alpha.-Dihydroxy-5-cholestenoic acid	0.231196	-5.06491	-0.343605
Theophylline	3.beta.,7.alpha.-Dihydroxy-5-cholestenoic acid	0.231196	-5.06491	-0.343605
3.beta.,7.alpha.-Dihydroxy-5-cholestenoic acid	Theobromine	0.231196	-0.343605	-5.06491
3.beta.,7.alpha.-Dihydroxy-5-cholestenoic acid	Theophylline	0.231196	-0.343605	-5.06491
Frangulin B	1,7-Dimethylxanthine	0.23094	-0.716607	-5.06491
1,7-Dimethylxanthine	Frangulin B	0.23094	-5.06491	-0.716607
Theobromine	Frangulin B	0.23094	-5.06491	-0.716607
Theophylline	Frangulin B	0.23094	-5.06491	-0.716607
Frangulin B	Theobromine	0.23094	-0.716607	-5.06491
Frangulin B	Theophylline	0.23094	-0.716607	-5.06491
6,8-Di-O-methylaverufin	2-Aminonicotinic acid	-0.230428	-0.770893	2.12488
2-Aminonicotinic acid	6,8-Di-O-methylaverufin	-0.230428	2.12488	-0.770893
3-(Methylsulfanyl)aniline	1,7-Dimethylxanthine	-0.229403	1.42859	-5.06491
1,7-Dimethylxanthine	3-(Methylsulfanyl)aniline	-0.229403	-5.06491	1.42859
Theobromine	3-(Methylsulfanyl)aniline	-0.229403	-5.06491	1.42859
Theophylline	3-(Methylsulfanyl)aniline	-0.229403	-5.06491	1.42859
3-(Methylsulfanyl)aniline	Theobromine	-0.229403	1.42859	-5.06491
3-(Methylsulfanyl)aniline	Theophylline	-0.229403	1.42859	-5.06491
Frangulin B	3-Hydroxy-5-[2-(4-hydroxyphenyl)ethyl]phenyl .beta.-D-glucopyranoside	-0.229318	-0.716607	1.50183
3-Hydroxy-5-[2-(4-hydroxyphenyl)ethyl]phenyl .beta.-D-glucopyranoside	Frangulin B	-0.229318	1.50183	-0.716607
6,8-Di-O-methylaverufin	2-Methyl-3-hydroxybutyric acid	-0.225647	-0.770893	0.711157
2-Methyl-3-hydroxybutyric acid	6,8-Di-O-methylaverufin	-0.225647	0.711157	-0.770893
Indolylmethyl-desulfoglucosinolate	6,8-Di-O-methylaverufin	-0.224708	1.00081	-0.770893
6,8-Di-O-methylaverufin	Indolylmethyl-desulfoglucosinolate	-0.224708	-0.770893	1.00081
2-Phenyl-1,3-thiazole-4-carboxylic acid	2-Methyl-3-hydroxybutyric acid	-0.221463	-0.398576	0.711157
2-Methyl-3-hydroxybutyric acid	2-Phenyl-1,3-thiazole-4-carboxylic acid	-0.221463	0.711157	-0.398576
Methyl 6-(acetyloxy)-1,3,7,11-tetrahydroxyabieta-8,11,13-trien-18-oate	1,7-Dimethylxanthine	-0.215487	1.93042	-5.06491
1,7-Dimethylxanthine	Methyl 6-(acetyloxy)-1,3,7,11-tetrahydroxyabieta-8,11,13-trien-18-oate	-0.215487	-5.06491	1.93042
Theobromine	Methyl 6-(acetyloxy)-1,3,7,11-tetrahydroxyabieta-8,11,13-trien-18-oate	-0.215487	-5.06491	1.93042
Theophylline	Methyl 6-(acetyloxy)-1,3,7,11-tetrahydroxyabieta-8,11,13-trien-18-oate	-0.215487	-5.06491	1.93042
Methyl 6-(acetyloxy)-1,3,7,11-tetrahydroxyabieta-8,11,13-trien-18-oate	Theobromine	-0.215487	1.93042	-5.06491
Methyl 6-(acetyloxy)-1,3,7,11-tetrahydroxyabieta-8,11,13-trien-18-oate	Theophylline	-0.215487	1.93042	-5.06491
Frangulin B	3.beta.,7.alpha.-Dihydroxy-5-cholestenoic acid	0.213097	-0.716607	-0.343605
3.beta.,7.alpha.-Dihydroxy-5-cholestenoic acid	Frangulin B	0.213097	-0.343605	-0.716607
3-Hydroxyhept-4-enoylcarnitine	1,7-Dimethylxanthine	0.199949	-0.314072	-5.06491
1,7-Dimethylxanthine	3-Hydroxyhept-4-enoylcarnitine	0.199949	-5.06491	-0.314072
Theobromine	3-Hydroxyhept-4-enoylcarnitine	0.199949	-5.06491	-0.314072
Theophylline	3-Hydroxyhept-4-enoylcarnitine	0.199949	-5.06491	-0.314072
3-Hydroxyhept-4-enoylcarnitine	Theobromine	0.199949	-0.314072	-5.06491
3-Hydroxyhept-4-enoylcarnitine	Theophylline	0.199949	-0.314072	-5.06491
S-(4-Fluorophenyl)mercapturic acid	Methyl 6-(acetyloxy)-1,3,7,11-tetrahydroxyabieta-8,11,13-trien-18-oate	-0.198071	0.311849	1.93042
Methyl 6-(acetyloxy)-1,3,7,11-tetrahydroxyabieta-8,11,13-trien-18-oate	S-(4-Fluorophenyl)mercapturic acid	-0.198071	1.93042	0.311849
6,8-Di-O-methylaverufin	3-(Methylsulfanyl)aniline	-0.197558	-0.770893	1.42859
3-(Methylsulfanyl)aniline	6,8-Di-O-methylaverufin	-0.197558	1.42859	-0.770893
2-Phenyl-1,3-thiazole-4-carboxylic acid	1,7-Dimethylxanthine	0.194997	-0.398576	-5.06491
1,7-Dimethylxanthine	2-Phenyl-1,3-thiazole-4-carboxylic acid	0.194997	-5.06491	-0.398576
Theobromine	2-Phenyl-1,3-thiazole-4-carboxylic acid	0.194997	-5.06491	-0.398576
Theophylline	2-Phenyl-1,3-thiazole-4-carboxylic acid	0.194997	-5.06491	-0.398576
2-Phenyl-1,3-thiazole-4-carboxylic acid	Theobromine	0.194997	-0.398576	-5.06491
2-Phenyl-1,3-thiazole-4-carboxylic acid	Theophylline	0.194997	-0.398576	-5.06491
3.beta.,7.alpha.-Dihydroxy-5-cholestenoic acid	3-Hydroxy-5-[2-(4-hydroxyphenyl)ethyl]phenyl .beta.-D-glucopyranoside	-0.192009	-0.343605	1.50183
3-Hydroxy-5-[2-(4-hydroxyphenyl)ethyl]phenyl .beta.-D-glucopyranoside	3.beta.,7.alpha.-Dihydroxy-5-cholestenoic acid	-0.192009	1.50183	-0.343605
Frangulin B	2-Methyl-3-hydroxybutyric acid	-0.185264	-0.716607	0.711157
2-Methyl-3-hydroxybutyric acid	Frangulin B	-0.185264	0.711157	-0.716607
S-(4-Fluorophenyl)mercapturic acid	2-Bromo-5-(pyrrolidin-1-yl)pyrazine	-0.184581	0.311849	-0.487172
Methyl 6-(acetyloxy)-1,3,7,11-tetrahydroxyabieta-8,11,13-trien-18-oate	3-Hydroxyhept-4-enoylcarnitine	-0.184581	1.93042	-0.314072
3-Hydroxyhept-4-enoylcarnitine	Methyl 6-(acetyloxy)-1,3,7,11-tetrahydroxyabieta-8,11,13-trien-18-oate	-0.184581	-0.314072	1.93042
2-Bromo-5-(pyrrolidin-1-yl)pyrazine	S-(4-Fluorophenyl)mercapturic acid	-0.184581	-0.487172	0.311849
Indolylmethyl-desulfoglucosinolate	3-(Methylsulfanyl)aniline	0.182703	1.00081	1.42859
3-(Methylsulfanyl)aniline	Indolylmethyl-desulfoglucosinolate	0.182703	1.42859	1.00081
Frangulin B	2-Aminonicotinic acid	-0.177751	-0.716607	2.12488
2-Aminonicotinic acid	Frangulin B	-0.177751	2.12488	-0.716607
3-(Methylsulfanyl)aniline	2-Bromo-5-(pyrrolidin-1-yl)pyrazine	-0.174336	1.42859	-0.487172
2-Bromo-5-(pyrrolidin-1-yl)pyrazine	3-(Methylsulfanyl)aniline	-0.174336	-0.487172	1.42859
2-Methyl-3-hydroxybutyric acid	2-Bromo-5-(pyrrolidin-1-yl)pyrazine	-0.168701	0.711157	-0.487172
2-Bromo-5-(pyrrolidin-1-yl)pyrazine	2-Methyl-3-hydroxybutyric acid	-0.168701	-0.487172	0.711157
3-Hydroxyhept-4-enoylcarnitine	3-(Methylsulfanyl)aniline	-0.167848	-0.314072	1.42859
3-(Methylsulfanyl)aniline	3-Hydroxyhept-4-enoylcarnitine	-0.167848	1.42859	-0.314072
Frangulin B	3-(Methylsulfanyl)aniline	-0.166994	-0.716607	1.42859
3-(Methylsulfanyl)aniline	Frangulin B	-0.166994	1.42859	-0.716607
PC(37:1)	2-Bromo-5-(pyrrolidin-1-yl)pyrazine	0.166055	1.98287	-0.487172
2-Bromo-5-(pyrrolidin-1-yl)pyrazine	PC(37:1)	0.166055	-0.487172	1.98287
3.beta.,7.alpha.-Dihydroxy-5-cholestenoic acid	2-Aminonicotinic acid	-0.165713	-0.343605	2.12488
2-Aminonicotinic acid	3.beta.,7.alpha.-Dihydroxy-5-cholestenoic acid	-0.165713	2.12488	-0.343605
3-Hydroxyhept-4-enoylcarnitine	2-Aminonicotinic acid	-0.162213	-0.314072	2.12488
2-Aminonicotinic acid	3-Hydroxyhept-4-enoylcarnitine	-0.162213	2.12488	-0.314072
Indolylmethyl-desulfoglucosinolate	3.beta.,7.alpha.-Dihydroxy-5-cholestenoic acid	-0.158713	1.00081	-0.343605
3.beta.,7.alpha.-Dihydroxy-5-cholestenoic acid	Indolylmethyl-desulfoglucosinolate	-0.158713	-0.343605	1.00081
S-(4-Fluorophenyl)mercapturic acid	1,7-Dimethylxanthine	-0.157432	0.311849	-5.06491
1,7-Dimethylxanthine	S-(4-Fluorophenyl)mercapturic acid	-0.157432	-5.06491	0.311849
Theobromine	S-(4-Fluorophenyl)mercapturic acid	-0.157432	-5.06491	0.311849
Theophylline	S-(4-Fluorophenyl)mercapturic acid	-0.157432	-5.06491	0.311849
S-(4-Fluorophenyl)mercapturic acid	Theobromine	-0.157432	0.311849	-5.06491
S-(4-Fluorophenyl)mercapturic acid	Theophylline	-0.157432	0.311849	-5.06491
2-Bromo-5-(pyrrolidin-1-yl)pyrazine	2-Aminonicotinic acid	-0.157005	-0.487172	2.12488
2-Aminonicotinic acid	2-Bromo-5-(pyrrolidin-1-yl)pyrazine	-0.157005	2.12488	-0.487172
Methyl 6-(acetyloxy)-1,3,7,11-tetrahydroxyabieta-8,11,13-trien-18-oate	2-Phenyl-1,3-thiazole-4-carboxylic acid	0.15581	1.93042	-0.398576
2-Phenyl-1,3-thiazole-4-carboxylic acid	Methyl 6-(acetyloxy)-1,3,7,11-tetrahydroxyabieta-8,11,13-trien-18-oate	0.15581	-0.398576	1.93042
2-Hydroxy-6-methyl-4-(trifluoromethyl)nicotinonitrile	2-Bromo-5-(pyrrolidin-1-yl)pyrazine	-0.155041	0.661761	-0.487172
2-Bromo-5-(pyrrolidin-1-yl)pyrazine	2-Hydroxy-6-methyl-4-(trifluoromethyl)nicotinonitrile	-0.155041	-0.487172	0.661761
6,8-Di-O-methylaverufin	3.beta.,7.alpha.-Dihydroxy-5-cholestenoic acid	0.151541	-0.770893	-0.343605
3.beta.,7.alpha.-Dihydroxy-5-cholestenoic acid	6,8-Di-O-methylaverufin	0.151541	-0.343605	-0.770893
3-(Methylsulfanyl)aniline	2-Phenyl-1,3-thiazole-4-carboxylic acid	-0.151029	1.42859	-0.398576
2-Phenyl-1,3-thiazole-4-carboxylic acid	3-(Methylsulfanyl)aniline	-0.151029	-0.398576	1.42859
6,8-Di-O-methylaverufin	3-Hydroxyhept-4-enoylcarnitine	0.150773	-0.770893	-0.314072
3-Hydroxyhept-4-enoylcarnitine	6,8-Di-O-methylaverufin	0.150773	-0.314072	-0.770893
S-(4-Fluorophenyl)mercapturic acid	2-Phenyl-1,3-thiazole-4-carboxylic acid	-0.141211	0.311849	-0.398576
2-Phenyl-1,3-thiazole-4-carboxylic acid	S-(4-Fluorophenyl)mercapturic acid	-0.141211	-0.398576	0.311849
3.beta.,7.alpha.-Dihydroxy-5-cholestenoic acid	3-(Methylsulfanyl)aniline	-0.13532	-0.343605	1.42859
3-(Methylsulfanyl)aniline	3.beta.,7.alpha.-Dihydroxy-5-cholestenoic acid	-0.13532	1.42859	-0.343605
S-(4-Fluorophenyl)mercapturic acid	PC(37:1)	-0.135064	0.311849	1.98287
PC(37:1)	S-(4-Fluorophenyl)mercapturic acid	-0.135064	1.98287	0.311849
S-(4-Fluorophenyl)mercapturic acid	N-Acetyl-D-galactosamine 4-sulfate	-0.134466	0.311849	1.46548
N-Acetyl-D-galactosamine 4-sulfate	S-(4-Fluorophenyl)mercapturic acid	-0.134466	1.46548	0.311849
Frangulin B	6,8-Di-O-methylaverufin	0.133954	-0.716607	-0.770893
6,8-Di-O-methylaverufin	Frangulin B	0.133954	-0.770893	-0.716607
Indolylmethyl-desulfoglucosinolate	2-Phenyl-1,3-thiazole-4-carboxylic acid	0.133527	1.00081	-0.398576
2-Phenyl-1,3-thiazole-4-carboxylic acid	Indolylmethyl-desulfoglucosinolate	0.133527	-0.398576	1.00081
3.beta.,7.alpha.-Dihydroxy-5-cholestenoic acid	2-Phenyl-1,3-thiazole-4-carboxylic acid	0.130709	-0.343605	-0.398576
2-Phenyl-1,3-thiazole-4-carboxylic acid	3.beta.,7.alpha.-Dihydroxy-5-cholestenoic acid	0.130709	-0.398576	-0.343605
2-Methyl-3-hydroxybutyric acid	1,7-Dimethylxanthine	-0.123538	0.711157	-5.06491
1,7-Dimethylxanthine	2-Methyl-3-hydroxybutyric acid	-0.123538	-5.06491	0.711157
Theobromine	2-Methyl-3-hydroxybutyric acid	-0.123538	-5.06491	0.711157
Theophylline	2-Methyl-3-hydroxybutyric acid	-0.123538	-5.06491	0.711157
2-Methyl-3-hydroxybutyric acid	Theobromine	-0.123538	0.711157	-5.06491
2-Methyl-3-hydroxybutyric acid	Theophylline	-0.123538	0.711157	-5.06491
3-Hydroxyhept-4-enoylcarnitine	3-Hydroxy-5-[2-(4-hydroxyphenyl)ethyl]phenyl .beta.-D-glucopyranoside	-0.120464	-0.314072	1.50183
3-Hydroxy-5-[2-(4-hydroxyphenyl)ethyl]phenyl .beta.-D-glucopyranoside	3-Hydroxyhept-4-enoylcarnitine	-0.120464	1.50183	-0.314072
3-Hydroxyhept-4-enoylcarnitine	2-Phenyl-1,3-thiazole-4-carboxylic acid	0.119781	-0.314072	-0.398576
2-Phenyl-1,3-thiazole-4-carboxylic acid	3-Hydroxyhept-4-enoylcarnitine	0.119781	-0.398576	-0.314072
3-Hydroxy-5-[2-(4-hydroxyphenyl)ethyl]phenyl .beta.-D-glucopyranoside	2-Bromo-5-(pyrrolidin-1-yl)pyrazine	-0.111244	1.50183	-0.487172
2-Bromo-5-(pyrrolidin-1-yl)pyrazine	3-Hydroxy-5-[2-(4-hydroxyphenyl)ethyl]phenyl .beta.-D-glucopyranoside	-0.111244	-0.487172	1.50183
S-(4-Fluorophenyl)mercapturic acid	3-(Methylsulfanyl)aniline	-0.10817	0.311849	1.42859
3-(Methylsulfanyl)aniline	S-(4-Fluorophenyl)mercapturic acid	-0.10817	1.42859	0.311849
PC(37:1)	3-Hydroxyhept-4-enoylcarnitine	-0.096474	1.98287	-0.314072
3-Hydroxyhept-4-enoylcarnitine	PC(37:1)	-0.096474	-0.314072	1.98287
Methyl 6-(acetyloxy)-1,3,7,11-tetrahydroxyabieta-8,11,13-trien-18-oate	2-Bromo-5-(pyrrolidin-1-yl)pyrazine	0.0877657	1.93042	-0.487172
2-Bromo-5-(pyrrolidin-1-yl)pyrazine	Methyl 6-(acetyloxy)-1,3,7,11-tetrahydroxyabieta-8,11,13-trien-18-oate	0.0877657	-0.487172	1.93042
Frangulin B	2-Phenyl-1,3-thiazole-4-carboxylic acid	-0.0866559	-0.716607	-0.398576
2-Phenyl-1,3-thiazole-4-carboxylic acid	Frangulin B	-0.0866559	-0.398576	-0.716607
3-Hydroxyhept-4-enoylcarnitine	2-Hydroxy-6-methyl-4-(trifluoromethyl)nicotinonitrile	-0.0852898	-0.314072	0.661761
2-Hydroxy-6-methyl-4-(trifluoromethyl)nicotinonitrile	3-Hydroxyhept-4-enoylcarnitine	-0.0852898	0.661761	-0.314072
2-Phenyl-1,3-thiazole-4-carboxylic acid	2-Aminonicotinic acid	-0.0830701	-0.398576	2.12488
2-Aminonicotinic acid	2-Phenyl-1,3-thiazole-4-carboxylic acid	-0.0830701	2.12488	-0.398576
Frangulin B	2-Bromo-5-(pyrrolidin-1-yl)pyrazine	-0.0809357	-0.716607	-0.487172
2-Bromo-5-(pyrrolidin-1-yl)pyrazine	Frangulin B	-0.0809357	-0.487172	-0.716607
Methyl 6-(acetyloxy)-1,3,7,11-tetrahydroxyabieta-8,11,13-trien-18-oate	6,8-Di-O-methylaverufin	-0.0803381	1.93042	-0.770893
6,8-Di-O-methylaverufin	Methyl 6-(acetyloxy)-1,3,7,11-tetrahydroxyabieta-8,11,13-trien-18-oate	-0.0803381	-0.770893	1.93042
Indolylmethyl-desulfoglucosinolate	3-Hydroxyhept-4-enoylcarnitine	-0.07735	1.00081	-0.314072
3-Hydroxyhept-4-enoylcarnitine	Indolylmethyl-desulfoglucosinolate	-0.07735	-0.314072	1.00081
S-(4-Fluorophenyl)mercapturic acid	2,2'-Bipyridine-4,4'-dicarboxylic acid	0.0732519	0.311849	-0.246837
2,2'-Bipyridine-4,4'-dicarboxylic acid	S-(4-Fluorophenyl)mercapturic acid	0.0732519	-0.246837	0.311849
2-Phenyl-1,3-thiazole-4-carboxylic acid	2-Hydroxy-6-methyl-4-(trifluoromethyl)nicotinonitrile	-0.0724836	-0.398576	0.661761
2-Hydroxy-6-methyl-4-(trifluoromethyl)nicotinonitrile	2-Phenyl-1,3-thiazole-4-carboxylic acid	-0.0724836	0.661761	-0.398576
3-Hydroxy-5-[2-(4-hydroxyphenyl)ethyl]phenyl .beta.-D-glucopyranoside	2-Phenyl-1,3-thiazole-4-carboxylic acid	0.0683856	1.50183	-0.398576
2-Phenyl-1,3-thiazole-4-carboxylic acid	3-Hydroxy-5-[2-(4-hydroxyphenyl)ethyl]phenyl .beta.-D-glucopyranoside	0.0683856	-0.398576	1.50183
3.beta.,7.alpha.-Dihydroxy-5-cholestenoic acid	2-Bromo-5-(pyrrolidin-1-yl)pyrazine	-0.0659097	-0.343605	-0.487172
2-Bromo-5-(pyrrolidin-1-yl)pyrazine	3.beta.,7.alpha.-Dihydroxy-5-cholestenoic acid	-0.0659097	-0.487172	-0.343605
S-(4-Fluorophenyl)mercapturic acid	3-Hydroxy-5-[2-(4-hydroxyphenyl)ethyl]phenyl .beta.-D-glucopyranoside	-0.0549816	0.311849	1.50183
3-Hydroxy-5-[2-(4-hydroxyphenyl)ethyl]phenyl .beta.-D-glucopyranoside	S-(4-Fluorophenyl)mercapturic acid	-0.0549816	1.50183	0.311849
S-(4-Fluorophenyl)mercapturic acid	Frangulin B	-0.0545548	0.311849	-0.716607
Frangulin B	S-(4-Fluorophenyl)mercapturic acid	-0.0545548	-0.716607	0.311849
3-Hydroxyhept-4-enoylcarnitine	2-Methyl-3-hydroxybutyric acid	0.0467002	-0.314072	0.711157
2-Methyl-3-hydroxybutyric acid	3-Hydroxyhept-4-enoylcarnitine	0.0467002	0.711157	-0.314072
3-Hydroxyhept-4-enoylcarnitine	2-Bromo-5-(pyrrolidin-1-yl)pyrazine	0.0447366	-0.314072	-0.487172
2-Bromo-5-(pyrrolidin-1-yl)pyrazine	3-Hydroxyhept-4-enoylcarnitine	0.0447366	-0.487172	-0.314072
S-(4-Fluorophenyl)mercapturic acid	2-Aminonicotinic acid	-0.0396995	0.311849	2.12488
2-Aminonicotinic acid	S-(4-Fluorophenyl)mercapturic acid	-0.0396995	2.12488	0.311849
N-Acetyl-D-galactosamine 4-sulfate	2-Bromo-5-(pyrrolidin-1-yl)pyrazine	-0.0279177	1.46548	-0.487172
2-Bromo-5-(pyrrolidin-1-yl)pyrazine	N-Acetyl-D-galactosamine 4-sulfate	-0.0279177	-0.487172	1.46548
Frangulin B	3-Hydroxyhept-4-enoylcarnitine	-0.0277469	-0.716607	-0.314072
3-Hydroxyhept-4-enoylcarnitine	Frangulin B	-0.0277469	-0.314072	-0.716607
N-Acetyl-D-galactosamine 4-sulfate	2-Phenyl-1,3-thiazole-4-carboxylic acid	-0.0264663	1.46548	-0.398576
2-Phenyl-1,3-thiazole-4-carboxylic acid	N-Acetyl-D-galactosamine 4-sulfate	-0.0264663	-0.398576	1.46548
S-(4-Fluorophenyl)mercapturic acid	Indolylmethyl-desulfoglucosinolate	0.0233074	0.311849	1.00081
Indolylmethyl-desulfoglucosinolate	S-(4-Fluorophenyl)mercapturic acid	0.0233074	1.00081	0.311849
Indolylmethyl-desulfoglucosinolate	2-Bromo-5-(pyrrolidin-1-yl)pyrazine	0.0178434	1.00081	-0.487172
2-Bromo-5-(pyrrolidin-1-yl)pyrazine	Indolylmethyl-desulfoglucosinolate	0.0178434	-0.487172	1.00081
PC(37:1)	6,8-Di-O-methylaverufin	-0.00614702	1.98287	-0.770893
6,8-Di-O-methylaverufin	PC(37:1)	-0.00614702	-0.770893	1.98287
S-(4-Fluorophenyl)mercapturic acid	3.beta.,7.alpha.-Dihydroxy-5-cholestenoic acid	0.00145138	0.311849	-0.343605
3.beta.,7.alpha.-Dihydroxy-5-cholestenoic acid	S-(4-Fluorophenyl)mercapturic acid	0.00145138	-0.343605	0.311849
