# Supplementary material for: Identification of Potential Biomarkers for Breast Cancer Based on Salivary Metabolomics
Source: Research Square preprint supplement (doi:10.21203/rs.3.rs-6531859/v1), 2025-05-16
Supplement: Supplementary file 4 [file 512978a478e1080d8ae35831.xlsx]

## Sheet: NCvsBC
Pathway	Description	# compounds (dem)	Compounds (dem)	# compounds (all)	Compounds (all)	Total
hsa01100	Metabolic pathways - Homo sapiens (human)	12	C00270;C13747;C07480;C00163;C00140;C07130;C00319;C05235;C00550;C00350;C00157;C06162	164	C06337;C00387;C00109;C05842;C00020;C00099;C01879;C00299;C00147;C00106;C00407;C00208;C00475;C00362;C00417;C03196;C00270;C00864;C00253;C00954;C00178;C13747;C07480;C00785;C00294;C00993;C00163;C00180;C09099;C05629;C18043;C01083;C00140;C00439;C05828;C00183;C00123;C02376;C00212;C00334;C00025;C01042;C00089;C00296;C00245;C02067;C00642;C03519;C00262;C05123;C00041;C07130;C00408;C00319;C00300;C00979;C11457;…	3074
hsa00232	Caffeine metabolism - Homo sapiens (human)	3	C13747;C07480;C07130	4	C13747;C07480;C07130;C00385	22
hsa01250	Biosynthesis of nucleotide sugars - Homo sapiens (human)	2	C00270;C00140	11	C00270;C00140;C00137;C00103;C00043;C00052;C00357;C00636;C00275;C02713;C00267	200
hsa00520	Amino sugar and nucleotide sugar metabolism - Homo sapiens (human)	2	C00270;C00140	10	C00270;C00140;C00103;C00043;C00052;C00357;C00636;C00275;C02713;C00267	118
hsa00640	Propanoate metabolism - Homo sapiens (human)	2	C00163;C05235	4	C00109;C00099;C00163;C05235	41
hsa00564	Glycerophospholipid metabolism - Homo sapiens (human)	2	C00350;C00157	13	C00670;C06771;C00093;C00307;C00346;C00114;C00588;C00350;C04308;C02737;C00416;C04230;C00157	56
hsa00600	Sphingolipid metabolism - Homo sapiens (human)	2	C00319;C00550	7	C00319;C12144;C00346;C00836;C00550;C06125;C04737	35
hsa04071	Sphingolipid signaling pathway - Homo sapiens (human)	2	C00319;C00550	5	C00212;C00319;C00346;C00836;C00550	15
hsa04217	Necroptosis - Homo sapiens (human)	2	C00319;C00550	3	C00319;C00219;C00550	10
hsa04723	Retrograde endocannabinoid signaling - Homo sapiens (human)	2	C00350;C00157	6	C00334;C00025;C00219;C00350;C00157;C00689	19
hsa00590	Arachidonic acid metabolism - Homo sapiens (human)	1	C00157	2	C00219;C00157	79
hsa00591	Linoleic acid metabolism - Homo sapiens (human)	1	C00157	5	C14766;C03242;C00219;C06426;C00157	28
hsa00592	alpha-Linolenic acid metabolism - Homo sapiens (human)	1	C00157	2	C06427;C00157	44
hsa00563	Glycosylphosphatidylinositol (GPI)-anchor biosynthesis - Homo sapiens (human)	1	C00350	2	C00346;C00350	4
hsa00760	Nicotinate and nicotinamide metabolism - Homo sapiens (human)	1	C00163	11	C05842;C00253;C00163;C00334;C00745;C00022;C00153;C02918;C05843;C15987;C00232	55
hsa02010	ABC transporters - Homo sapiens (human)	1	C00140	31	C00387;C00299;C00407;C00208;C00475;C00294;C01083;C00140;C00183;C00123;C00212;C00025;C00089;C00245;C00041;C00148;C00719;C00137;C05512;C00093;C01835;C00255;C00559;C00079;C05402;C00047;C00077;C00064;C00114;C00062;C00009	138
hsa04140	Autophagy - animal - Homo sapiens (human)	1	C00350	1	C00350	6
hsa04136	Autophagy - other - Homo sapiens (human)	1	C00350	1	C00350	3
hsa04210	Apoptosis - Homo sapiens (human)	1	C00319	1	C00319	4
hsa04973	Carbohydrate digestion and absorption - Homo sapiens (human)	1	C00163	6	C00208;C00163;C12285;C00089;C01835;C00246	27
hsa04974	Protein digestion and absorption - Homo sapiens (human)	1	C00163	17	C00099;C00407;C00163;C00183;C00123;C00025;C08262;C00041;C00148;C00079;C00047;C00246;C00064;C00062;C00388;C02632;C01746	47
hsa05231	Choline metabolism in cancer - Homo sapiens (human)	1	C00157	8	C00670;C00093;C00307;C00114;C00588;C00416;C04230;C00157	11
hsa05167	Kaposi sarcoma-associated herpesvirus infection - Homo sapiens (human)	1	C00350	1	C00350	5
hsa05130	Pathogenic Escherichia coli infection - Homo sapiens (human)	1	C00350	1	C00350	3
