# Supplementary material for: Identification of Potential Biomarkers for Breast Cancer Based on Salivary Metabolomics
Source: Research Square preprint supplement (doi:10.21203/rs.3.rs-6531859/v1), 2025-05-16
Supplement: Supplementary file 5 [file 61666d709087c45214beae79.xlsx]

## Sheet: NCvs_BC
ID	MS2 name	MS2 score	level	MS1 name	MS1 ppm	mz	rt	type	Formula	HMDB	Chinese.Name	CAS	KEGG COMPOUND ID	Super.Class	Superclass.Chinese	Class	Class.Chinese	Sub.Class	Subclass.Chinese	INCHIKEY	A_1	A_10	A_11	A_12	A_13	A_14	A_15	A_16	A_17	A_18	A_19	A_2	A_20	A_3	A_4	A_5	A_6	A_7	A_8	A_9	MEAN A	B_1	B_10	B_11	B_2	B_3	B_4	B_5	B_6
13	N-Acetylvaline	3.98	level1			158.082	111.1	NEG	C7H13NO3	HMDB0011757	N -乙酰基- L -缬氨酸	96-81-1		Organic acids and derivatives	有机酸及其衍生物	Carboxylic acids and derivatives	羧酸及衍生物	Amino acids, peptides, and analogues	氨基酸、肽和类似物	IHYJTAOFMMMOPX-LURJTMIESA-N	0.00935708	0.00819396	0.00451846	0.016022	0.00573699	0.0038191	0.00571216	0.00892817	0.00919751	0.00572177	0.006657	0.0174562	0.00546704	0.0134854	0.00599967	0.0133494	0.00998309	0.0089057	0.00411304	0.0068328	0.00847283	0.00657512	0.0114169	0.00737369	0.00847382	0.0081298	0.00936072	0.0129062	0.00569618
34	N-Acetylneuraminic acid	3.97	level1			308.099	211.7	NEG	C11H19NO9	HMDB0000230	N-乙酰基神经氨酸	131-48-6	C00270	Organic oxygen compounds	有机含氧化合物	Organooxygen compounds	有机氧化合物	Carbohydrates and carbohydrate conjugates	碳水化合物和碳水化合物结合物	SQVRNKJHWKZAKO-LUWBGTNYSA-N	0.0462674	0.0161912	0.058315	0.0256498	0.056926	0.0380075	0.016687	0.0677108	0.0130557	0.0272474	0.00874763	0.0228461	0.0245834	0.0648683	0.0227119	0.102407	0.0111412	0.0578764	0.0243911	0.0713555	0.0388493	0.0475372	0.0991291	0.018786	0.0392415	0.0127316	0.0383285	0.028308	0.039557
44	1,7-Dimethylxanthine	3.97	level1			179.057	26.5	NEG	C7H8N4O2	HMDB0001860	副黄嘌呤	611-59-6	C13747	Organoheterocyclic compounds	有机杂环化合物	Imidazopyrimidines	咪唑并嘧啶	Purines and purine derivatives	嘌呤和嘌呤衍生物	QUNWUDVFRNGTCO-UHFFFAOYSA-N	0.331997	1.31567	0.226339	0.0324413	0.153868	1.0226	0.00375917	0.120218	0.0489738	0.157533	0.200295	0.243159	0.373633	0.00321231	0.00525891	0.139488	0.0327003	0.00455809	0.00716029	0.00422109	0.221354	0.00331529	0.0066653	0.00456011	0.00987296	0.0130539	0.00787329	0.0203023	0.00370324
49	Theobromine	3.96	level1			179.057	26.5	NEG	C7H8N4O2	HMDB0002825	可可碱	83-67-0	C07480	Organoheterocyclic compounds	有机杂环化合物	Imidazopyrimidines	咪唑并嘧啶	Purines and purine derivatives	嘌呤和嘌呤衍生物	YAPQBXQYLJRXSA-UHFFFAOYSA-N	0.331997	1.31567	0.226339	0.0324413	0.153868	1.0226	0.00375917	0.120218	0.0489738	0.157533	0.200295	0.243159	0.373633	0.00321231	0.00525891	0.139488	0.0327003	0.00455809	0.00716029	0.00422109	0.221354	0.00331529	0.0066653	0.00456011	0.00987296	0.0130539	0.00787329	0.0203023	0.00370324
55	N-Acetylgalactosamine	3.96	level1			220.083	140.5	NEG	C8H15NO6	HMDB0006480	β - N -乙酰- D -半乳糖胺	14131-60-3	C05021	Organic oxygen compounds	有机含氧化合物	Organooxygen compounds	有机氧化合物	Carbohydrates and carbohydrate conjugates	碳水化合物和碳水化合物结合物	OVRNDRQMDRJTHS-JAJWTYFOSA-N	0.0168217	0.00341151	0.023715	0.0115601	0.0131621	0.00880745	0.0206084	0.0128694	0.00153105	0.0144556	0.00463488	0.00738594	0.0025764	0.0218188	0.00329117	0.051742	0.00229959	0.00482071	0.00685508	0.0143593	0.0123363	0.0191788	0.162398	0.00316578	0.112565	0.00303038	0.00603706	0.0238191	0.00721004
59	Propionic acid	3.96	level1			73.0295	78.1	NEG	C3H6O2	HMDB0000237	丙酸	79-09-4	C00163	Organic acids and derivatives	有机酸及其衍生物	Carboxylic acids and derivatives	羧酸及衍生物	Carboxylic acids	羧酸	XBDQKXXYIPTUBI-UHFFFAOYSA-N	0.396556	0.273379	0.103365	0.34174	0.07728	0.130624	0.367192	0.390252	0.286246	0.499172	0.128022	0.0815712	0.13544	0.196187	0.146164	0.118746	0.0661865	0.245316	0.0813559	0.166917	0.211586	0.391498	0.549352	0.421751	0.191709	0.418999	0.180423	0.499305	0.0943327
71	N-Acetylglucosamine	3.95	level1			220.083	140.5	NEG	C8H15NO6	HMDB0062641	N-乙酰氨基葡萄糖	7512-17-6	C00140	Organic oxygen compounds	有机含氧化合物	Organooxygen compounds	有机氧化合物	Carbohydrates and carbohydrate conjugates	碳水化合物和碳水化合物结合物	MBLBDJOUHNCFQT-LXGUWJNJSA-N	0.0168217	0.00341151	0.023715	0.0115601	0.0131621	0.00880745	0.0206084	0.0128694	0.00153105	0.0144556	0.00463488	0.00738594	0.0025764	0.0218188	0.00329117	0.051742	0.00229959	0.00482071	0.00685508	0.0143593	0.0123363	0.0191788	0.162398	0.00316578	0.112565	0.00303038	0.00603706	0.0238191	0.00721004
105	PE(P-18:0/18:1(9Z))	3.95	level1			728.56	58.4	NEG	C41H80NO7P	HMDB0011375		144371-68-6		Lipids and lipid-like molecules	脂质和类脂分子	Glycerophospholipids	甘油磷脂类	Glycerophosphoethanolamines	磷脂酰乙醇胺	XVYPOHCSLJZFED-QZEVRULJSA-N	0.040552	0.00367058	0.00358778	0.00134169	0.0106507	0.0272253	0.0713308	0.0156424	0.0297601	0.0358643	0.0020843	0.0728515	0.0513088	0.187133	0.116813	0.249924	0.150194	0.132714	0.0729646	0.0209082	0.064826	0.0455863	0.38547	0.0781458	0.10733	0.00417517	0.0124378	0.044175	0.0123588
114	Theophylline	3.94	level1			179.057	26.5	NEG	C7H8N4O2	HMDB0001889	茶碱	58-55-9	C07130	Organoheterocyclic compounds	有机杂环化合物	Imidazopyrimidines	咪唑并嘧啶	Purines and purine derivatives	嘌呤和嘌呤衍生物	ZFXYFBGIUFBOJW-UHFFFAOYSA-N	0.331997	1.31567	0.226339	0.0324413	0.153868	1.0226	0.00375917	0.120218	0.0489738	0.157533	0.200295	0.243159	0.373633	0.00321231	0.00525891	0.139488	0.0327003	0.00455809	0.00716029	0.00422109	0.221354	0.00331529	0.0066653	0.00456011	0.00987296	0.0130539	0.00787329	0.0203023	0.00370324
125	LPE(18:1(9Z)/0:0)	3.94	level1			480.308	112.9	POS	C23H46NO7P	HMDB0011506	1 - ( 9Z -十八烯酰基) - sn-甘油-3 -磷酸乙醇胺	89576-29-4		Lipids and lipid-like molecules	脂质和类脂分子	Glycerophospholipids	甘油磷脂类	Glycerophosphoethanolamines	磷脂酰乙醇胺	PYVRVRFVLRNJLY-MZMPXXGTSA-N	0.0627196	0.0100685	0.0053262	0.0338099	0.00342641	0.00246715	0.0327321	0.0236197	0.00655087	0.00891286	0.00134176	0.173187	0.0254865	0.0319825	0.0264889	0.0990748	0.012275	0.0406175	0.0076341	0.0110503	0.0309386	0.0343001	0.380075	0.0299342	0.0535793	0.00152626	0.00686206	0.0123273	0.00863734
128	Sphingosine	3.94	level1			300.289	32.4	POS	C18H37NO2	HMDB0000252	鞘氨醇	123-78-4	C00319	Organic nitrogen compounds	有机含氮化合物	Organonitrogen compounds	有机氮化合物	Amines	胺	WWUZIQQURGPMPG-KRWOKUGFSA-N	0.0171696	0.006829	0.00670333	0.043525	0.00510294	0.0106331	0.0490323	0.019435	0.0218182	0.0121066	0.00732093	0.0730206	0.0653465	0.0297499	0.034532	0.262923	0.0684346	0.0582217	0.0302236	0.0115022	0.0416815	0.121931	0.250375	0.0172283	0.03588	0.00583536	0.0273546	0.0464451	0.00567674
130	Cer(d18:1/16:0)	3.94	level1			520.508	17.5	POS	C34H67NO3	HMDB0004949	C16 -神经酰胺	24696-26-2		Lipids and lipid-like molecules	脂质和类脂分子	Sphingolipids	鞘脂类	Ceramides	神经酰胺	YDNKGFDKKRUKPY-UHFFFAOYSA-N	0.00266695	7.35748e-06	7.73968e-06	5.49296e-05	6.6035e-06	6.35635e-06	0.00474062	0.00195769	0.00561859	0.00261024	6.40003e-06	0.00803732	0.0165859	0.0125358	0.0102172	0.0340087	0.0245222	0.028613	0.0163487	7.01008e-06	0.00842797	0.0141386	0.0304955	0.00315629	0.0128743	6.4774e-06	0.0016829	0.0322484	6.97649e-06
154	N-Acetylcadaverine	3.93	level1			145.133	180.5	POS	C7H16N2O	HMDB0002284	N - ( 5 -氨基戊基)乙酰胺	32343-73-0		Organic acids and derivatives	有机酸及其衍生物	Carboxylic acids and derivatives	羧酸及衍生物	Carboxylic acid derivatives	羧酸衍生物	RMOIHHAKNOFHOE-UHFFFAOYSA-N	0.489559	0.258796	0.0779787	0.253729	0.119516	0.191688	0.063147	0.245363	0.123812	0.134518	0.222661	0.245479	0.299891	0.395197	0.174401	0.575516	0.156859	0.924169	0.190751	0.213613	0.267832	0.114289	4.57908	0.478461	0.59029	0.159347	0.180892	0.219634	0.119353
174	2-Methyl-3-hydroxybutyric acid	3.93	level1			117.056	97.5	NEG	C5H10O3	HMDB0000354	2 -甲基- 3 -羟基丁酸	473-86-9		Lipids and lipid-like molecules	脂质和类脂分子	Fatty Acyls	脂肪酰类	Fatty acids and conjugates	脂肪酸和聚合物	VEXDRERIMPLZLU-UHFFFAOYSA-N	0.0187371	0.0233155	0.00743316	0.0142441	0.00797227	0.0117783	0.0130275	0.0126289	0.0135566	0.0157181	0.012306	0.0215079	0.0114211	0.0157702	0.0111045	0.0303056	0.00630241	0.0365026	0.00822225	0.0155963	0.0153725	0.0106718	0.0194384	0.0222423	0.0133568	0.0142223	0.016541	0.0211762	0.00870187
354	2-Methylbutyrylglycine	3.83	level1			158.082	111.1	NEG	C7H13NO3	HMDB0000339	2 -甲基丁酰甘氨酸	52320-67-9		Organic acids and derivatives	有机酸及其衍生物	Carboxylic acids and derivatives	羧酸及衍生物	Amino acids, peptides, and analogues	氨基酸、肽和类似物	HOACIBQKYRHBOW-UHFFFAOYSA-N	0.00935708	0.00819396	0.00451846	0.016022	0.00573699	0.0038191	0.00571216	0.00892817	0.00919751	0.00572177	0.006657	0.0174562	0.00546704	0.0134854	0.00599967	0.0133494	0.00998309	0.0089057	0.00411304	0.0068328	0.00847283	0.00657512	0.0114169	0.00737369	0.00847382	0.0081298	0.00936072	0.0129062	0.00569618
359	PC(14:0/14:0)	3.83	level1			678.506	56	POS	C36H72NO8P	HMDB0007866	1, 2 -二肉豆蔻酰基- sn -甘油-3 -磷酸胆碱	18194-24-6		Lipids and lipid-like molecules	脂质和类脂分子	Glycerophospholipids	甘油磷脂类	Glycerophosphocholines	甘油磷酸胆碱	CITHEXJVPOWHKC-UUWRZZSWSA-N	0.0155358	0.000196028	4.94945e-05	0.0067281	0.000688345	0.00642889	0.00720855	0.00147064	0.0205244	0.0132886	3.01917e-05	0.00588965	0.0191936	0.0348445	0.0196577	0.144138	0.0162939	0.0192063	0.00699039	0.000623795	0.0169494	0.0110307	0.175049	0.00430605	0.00700356	0.00424802	0.0025979	0.0279395	0.000196214
381	PC(18:0/18:1(9Z))	3.8	level1			788.613	43	POS	C44H86NO8P	HMDB0008038	1 -硬脂酰- 2 -油酰基- sn -甘油-3 -磷酸胆碱	56421-10-4		Lipids and lipid-like molecules	脂质和类脂分子	Glycerophospholipids	甘油磷脂类	Glycerophosphocholines	甘油磷酸胆碱	ATHVAWFAEPLPPQ-VRDBWYNSSA-N	0.0979827	0.00436035	0.0162185	0.0109669	0.0164884	0.0374124	0.130711	0.0509328	0.0884504	0.0825624	0.0109919	0.462767	0.136653	0.561568	0.316635	2.65451	0.523543	0.450028	0.363617	0.0520789	0.303424	0.133406	3.92074	0.101126	0.335252	0.0151011	0.0532896	0.197853	0.0469018
388	1-oleoyl-2-myristoyl-sn-glycero-3-phosphocholine	3.79	level1			732.552	43.7	POS	C40H78NO8P	HMDB0008097	1-油酰-2-肉豆蔻酰-sn-甘油-3-磷酸胆碱	95896-56-3		Lipids and lipid-like molecules	脂质和类脂分子	Glycerophospholipids	甘油磷脂类	Glycerophosphocholines	甘油磷酸胆碱	KIVAJCJTVPWSRJ-OQHNRNOKSA-N	0.0176364	0.00873794	0.0104273	0.0177968	0.00617482	0.00731737	0.0185274	0.0130789	0.0320565	0.0215279	0.00252951	0.0652799	0.035042	0.0576748	0.0630209	0.560615	0.151368	0.0377919	0.0746526	0.00480157	0.0603029	0.100352	0.737479	0.0199954	0.078477	0.00528951	0.0186026	0.101626	0.00660307
389	Phe-Lys	3.79	level1			292.167	209.1	NEG	C15H23N3O3	HMDB0029000	苯丙氨酰赖氨酸	6456-72-0		Organic acids and derivatives	有机酸及其衍生物	Carboxylic acids and derivatives	羧酸及衍生物	Amino acids, peptides, and analogues	氨基酸、肽和类似物	FADYJNXDPBKVCA-STQMWFEESA-N	0.00150775	0.000495449	0.00336828	1.27469e-05	0.00190375	0.0022881	0.00190338	0.00106355	0.002479	0.000494063	0.00123276	0.00504408	0.00285359	0.00330288	0.00263739	0.00271997	0.00156666	0.000655343	0.00138143	0.000430483	0.00186703	0.0018243	0.0135449	0.00328096	0.00685996	0.000356786	0.00473863	0.00139067	0.0014148
396	Hydroxyacetone	3.75	level1			73.0295	78.1	NEG	C3H6O2	HMDB0006961	羟基丙酮	116-09-6	C05235	Organic oxygen compounds	有机含氧化合物	Organooxygen compounds	有机氧化合物	Carbonyl compounds	羰基化合物	XLSMFKSTNGKWQX-UHFFFAOYSA-N	0.396556	0.273379	0.103365	0.34174	0.07728	0.130624	0.367192	0.390252	0.286246	0.499172	0.128022	0.0815712	0.13544	0.196187	0.146164	0.118746	0.0661865	0.245316	0.0813559	0.166917	0.211586	0.391498	0.549352	0.421751	0.191709	0.418999	0.180423	0.499305	0.0943327
415	2-Aminonicotinic acid	3.74	level1			137.036	78.7	NEG	C6H6N2O2	HMDB0061680	2-氨基烟酸	5345-47-1		Organoheterocyclic compounds	有机杂环化合物	Pyridines and derivatives	吡啶及衍生物	Pyridinecarboxylic acids and derivatives	吡啶羧酸及衍生物	KPIVDNYJNOPGBE-UHFFFAOYSA-N	0.0134665	0.0229497	0.0173683	0.146492	0.060678	0.0270354	0.154029	0.049859	0.0349229	0.0331632	0.0225478	0.0533855	0.0266042	0.0238671	0.0156028	0.160718	0.028831	0.0831022	0.0850463	0.02079	0.054023	0.363659	0.403669	0.179003	0.362447	0.115201	0.0362263	0.057432	0.111267
421	Imazamethabenz	3.73	level1			275.138	60.2	POS	C15H18N2O3	HMDB0034885	咪草酸	100728-84-5	C11083	Organic acids and derivatives	有机酸及其衍生物	Carboxylic acids and derivatives	羧酸及衍生物	Amino acids, peptides, and analogues	氨基酸、肽和类似物	KFEFNHNXZQYTEW-UHFFFAOYSA-N	0.00404297	0.00274799	0.00767202	0.0257327	0.00362325	0.00690692	0.00261525	0.00413388	0.00599388	0.00124924	0.00294569	0.0121802	0.0059201	0.0089624	0.00342164	0.00529277	0.00477494	0.00437735	0.00271308	0.00403541	0.00596709	0.0051024	0.0515735	0.00611398	0.0146495	0.000775576	0.0104236	0.00292845	0.00423523
432	PE(17:0/17:0)	3.71	level1			720.551	48.3	POS	C39H78NO8P		1,2-双十七碳酰-sn-甘油-3-磷酸乙醇胺	140219-78-9		Lipids and lipid-like molecules	脂质和类脂分子	Glycerophospholipids	甘油磷脂类	Glycerophosphoethanolamines	磷脂酰乙醇胺	YSFFAUPDXKTJMR-DIPNUNPCSA-N	0.00808217	0.00124379	0.000881554	0.0137043	0.00120202	0.00540435	0.00924352	0.00569762	0.0140488	0.010156	0.00157512	0.024546	0.0212986	0.0288854	0.0208273	0.197696	0.0212146	0.026717	0.0127114	0.0016558	0.0213396	0.0302574	0.17496	0.0079949	0.0227034	0.00377495	0.00354098	0.0323336	0.0119029
433	PC(16:0/18:1(9Z))	3.71	level1			760.583	42.9	POS	C42H82NO8P	HMDB0007972	2 -油酰基- 1 -棕榈酰基- sn -甘油-3 -磷酸胆碱		C13875	Lipids and lipid-like molecules	脂质和类脂分子	Glycerophospholipids	甘油磷脂类	Glycerophosphocholines	甘油磷酸胆碱	WTJKGGKOPKCXLL-RYDYYDTQSA-N	0.239178	0.0693462	0.063481	0.401113	0.0639101	0.10544	0.308035	0.215455	0.233895	0.245776	0.0432985	0.876732	0.570228	1.20923	0.757752	6.52277	0.657156	0.819359	0.800902	0.142241	0.717265	0.528757	9.7384	0.338742	0.895056	0.0534272	0.255611	0.579532	0.113449
482	Ile-Tyr	2.74	level2			293.151	115.1	NEG	C15H22N2O4			38579-21-4		Organic acids and derivatives	有机酸及其衍生物	Carboxylic acids and derivatives	羧酸及衍生物	Amino acids, peptides, and analogues	氨基酸、肽和类似物	MUFXDFWAJSPHIQ-BIMULSAOSA-N	0.0705618	0.0149307	0.0305067	0.0487472	0.0236274	0.0205454	0.0322357	0.0337248	0.0295073	0.0430122	0.0150987	0.0990909	0.0775051	0.0848813	0.0356526	0.0881502	0.0106548	0.0479445	0.0180764	0.0239716	0.0424213	0.0289128	0.224929	0.0708766	0.202732	0.00534494	0.0385118	0.0150411	0.0529493
501	PC(39:4)	2.74	level2			806.606	47	POS	C47H86NO8P											ZLIKFQVVAPOQPP-WPTIIEFGSA-N	0.00221915	0.0163077	0.0105619	0.0438697	0.00517068	0.00812971	0.0166714	0.00541381	0.00155271	0.00642036	0.0115057	0.104685	0.00975565	0.042293	0.027727	0.0380056	0.0109403	0.0211129	0.00740312	0.00849072	0.0199118	0.0129422	0.0929008	0.0110018	0.00768558	0.00415325	0.0340171	0.000371591	0.00150772
522	N-Methyl-N-(methylsulfonyl)glycine	2.73	level2			166.018	73.5	NEG	C4H9NO4S			115665-52-6		Organic acids and derivatives	有机酸及其衍生物	Carboxylic acids and derivatives	羧酸及衍生物	Amino acids, peptides, and analogues	氨基酸、肽和类似物	BJJBJDSBYILUDE-UHFFFAOYSA-N	0.0337455	0.0146915	0.0165215	0.0575005	0.0168824	0.0134165	0.0168668	0.0224926	0.0152966	0.0200155	0.0187191	0.0196301	0.00031728	0.0493077	0.0171768	0.0355304	0.0184992	0.0709387	0.0213825	0.0220043	0.0250468	0.0204895	0.0843356	0.0223163	0.0240412	0.0338997	0.0186802	0.0325221	0.0266711
536	Bilobalide A	2.73	level2			327.1	13.2	POS	C15H18O8	HMDB0036735		33570-04-6	C07605	Lipids and lipid-like molecules	脂质和类脂分子	Prenol lipids	异戊烯醇脂类	Terpene lactones	萜类内酯	MOLPUWBMSBJXER-NRSGSQFTSA-N	0.00766315	0.0068028	0.00321443	0.0339155	0.00302289	0.00183817	0.00376282	0.00924994	0.00494131	0.000684446	0.00982004	0.00976707	0.00320401	0.00165138	0.00296948	0.000355165	0.00329192	0.000772649	0.00189021	0.00621585	0.00575166	0.000741696	0.000593802	0.00178728	0.0044461	0.00139945	0.00456854	0.0020633	0.00852189
577	5-Hydroxy-2-(hydroxymethyl)pyridine	2.72	level2			124.04	101.6	NEG	C6H7NO2			40222-77-3		Organoheterocyclic compounds	有机杂环化合物	Pyridines and derivatives	吡啶及衍生物	Hydroxypyridines	羟基吡啶	NESFDGDRYVANBC-UHFFFAOYSA-N	0.0533355	0.0311342	0.0447814	0.0148436	0.0383701	0.022657	0.0207279	0.066853	0.0175725	0.00732641	0.0220445	0.0218989	0.0303335	0.0547123	0.0308344	0.0695759	0.0145857	0.0430927	0.0251174	0.0613961	0.0345597	0.0445064	0.0657699	0.0279357	0.0438589	0.0131359	0.0434851	0.0309916	0.0408399
583	N-Acetyl-D-galactosamine 4-sulfate	2.72	level2			300.039	63	NEG	C8H15NO9S			45233-43-0		Organic oxygen compounds	有机含氧化合物	Organooxygen compounds	有机氧化合物	Carbohydrates and carbohydrate conjugates	碳水化合物和碳水化合物结合物	RKFMAQNDSSSRTH-OSMVPFSASA-N	0.196554	0.0674536	0.0694161	0.0740829	0.0730296	0.0269195	0.0652712	0.306156	0.050087	0.120976	0.0424934	0.132409	0.140006	0.379219	0.173004	0.256055	0.0509115	0.469917	0.0617085	0.280599	0.151813	0.0940571	0.788514	0.293202	0.286436	0.167207	0.0840131	0.0320173	0.174607
601	DANTHRON	2.72	level2			239.059	17.4	NEG	C14H8O4	HMDB0029752		117-10-2	C10312	Benzenoids	苯环型化合物	Anthracenes	蒽类	Anthraquinones	蒽醌	QBPFLULOKWLNNW-UHFFFAOYSA-N	0.152984	0.119226	0.140733	1.3534	0.263825	0.609207	0.107941	0.0855859	0.278916	0.32649	0.233719	0.0230235	0.210463	0.0731295	0.233201	0.145647	0.216914	0.390888	0.260092	0.236241	0.273081	0.214511	0.0602796	0.0780756	0.249265	0.0897719	0.240139	0.123153	0.101342
603	Marimastat	2.72	level2			332.217	119.2	POS	C15H29N3O5	HMDB0014924	马立马司他	154039-60-8	D03795	Organic oxygen compounds	有机含氧化合物	Organooxygen compounds	有机氧化合物	Alcohols and polyols	乙醇和多元醇	OCSMOTCMPXTDND-OUAUKWLOSA-N	0.0107975	0.00136383	0.00144603	0.00587897	0.00470564	0.000483876	0.00306781	0.0124948	0.00562946	0.00880371	0.00485035	0.0319868	0.0238423	0.0268553	0.000773792	0.0380896	0.000371996	0.0477995	0.00553691	0.00655026	0.0120664	0.00101968	0.278424	0.00348133	0.0988007	0.0117106	0.00221907	0.00607453	0.00881134
606	PC(42:1)	2.72	level2			854.698	78.3	POS	C50H98NO8P											ANFDUMGBUYRUGT-PZPDSNGWSA-N	5.75135e-05	7.35748e-06	7.73968e-06	5.49296e-05	6.6035e-06	6.35635e-06	0.000885947	7.65125e-06	6.63944e-06	6.73331e-06	6.40003e-06	1.19552e-05	0.000455039	0.00322156	0.00159453	0.00275998	0.000456726	0.00179218	6.99202e-06	7.01008e-06	0.000567992	0.000259569	0.014635	0.000100533	0.000800776	6.4774e-06	6.4469e-06	5.93157e-06	6.97649e-06
607	PC(37:1)	2.72	level2			784.62	77.6	POS	C45H88NO8P											IEFQKHWAFKLKLO-KSXPKIBJSA-N	0.00112499	9.87971e-05	7.73968e-06	5.49296e-05	9.14077e-05	0.000126676	0.00186759	0.000681487	0.000694146	0.000649509	6.40003e-06	0.0014757	0.00268958	0.0104552	0.00505621	0.00211953	0.00270268	0.00372789	0.00113492	0.00130935	0.00180374	0.00193214	0.0219332	0.0015301	0.00316537	6.4774e-06	9.12257e-05	0.00101545	0.000273074
608	PC(37:2)	2.72	level2			782.605	55.4	POS	C45H86NO8P											KKOZCDBORUPHQN-IWJLHGGLSA-N	0.00420503	0.0036937	0.00219276	0.0186373	0.000875882	0.00315949	0.0127708	0.00394914	0.00388906	0.00203188	0.0051465	0.0163177	0.00620936	0.0236146	0.0313596	0.0595194	0.00847796	0.0124194	0.00573751	0.00422475	0.0114216	0.00659358	0.155798	0.00590965	0.0153517	0.00224366	0.0012632	0.00327027	0.00426096
611	PC(33:1)	2.71	level2			746.568	76.9	POS	C41H80NO8P											WREFFDHULRUCNV-SIIXSRIISA-N	0.00964418	0.000699273	0.00132436	0.00771629	0.00273983	0.00375429	0.0171655	0.00708291	0.00681654	0.00850875	0.000188672	0.00589206	0.0115735	0.0627696	0.0218196	0.0469172	0.024752	0.0267714	0.0107751	0.00753627	0.0142224	0.0125008	0.179734	0.00978099	0.0214314	0.00166013	0.00189665	0.0094911	0.00466626
618	2-(9,10-Dioxo-9,10-dihydro-1-anthracenyl)-1H-isoindole-1,3(2H)-dione	2.71	level2			354.077	211.6	POS	C22H11NO4			40101-29-9		Benzenoids	苯环型化合物	Anthracenes	蒽类	Anthraquinones	蒽醌	KBLFCHZTXMGMCV-UHFFFAOYSA-N	0.0185934	0.0064513	0.0120729	0.0125215	0.0169377	0.0173873	0.00390525	0.0265106	0.00340083	0.00870318	0.00212947	0.0114156	0.0101505	0.0174655	0.00733304	0.0483305	0.00385776	0.015233	0.00649896	0.020437	0.0134668	0.0134337	0.0603611	0.00704729	0.0174565	0.00348692	0.00928764	0.0100852	0.0139498
632	N-Nervonoyl-D-erythro-sphingosylphosphorylcholine	2.71	level2			813.683	104.5	POS	C47H93N2O6P	HMDB0012107		94359-13-4	C00550	Lipids and lipid-like molecules	脂质和类脂分子	Sphingolipids	鞘脂类	Phosphosphingolipids	鞘磷脂	WKZHECFHXLTOLJ-QYKFWSDSSA-N	0.143586	0.0138841	0.0148211	0.266	0.0206896	0.0282217	0.0941474	0.0699607	0.0342936	0.0513846	0.00416814	0.240011	0.103746	0.316705	0.220325	0.649313	0.0985276	0.253692	0.0770415	0.0818656	0.139119	0.0792575	1.91622	0.089208	0.210234	0.00499506	0.0227167	0.0951203	0.0363991
647	Dodemorph	2.71	level2			282.279	32.6	POS	C18H35NO			1593-77-7		Organoheterocyclic compounds	有机杂环化合物	Oxazinanes	恶嗪烷	Morpholines	吗啉	JMXKCYUTURMERF-UHFFFAOYSA-N	0.00993284	0.00497009	7.73968e-06	0.0279571	0.00213347	0.00547905	0.0289724	0.0115665	0.0125648	0.00745484	0.00505681	0.0394767	0.0363876	0.0184617	0.0165575	0.135458	0.0362029	0.0366662	0.0160279	0.000403109	0.0225868	0.0610634	0.142809	0.00935679	0.0196724	0.00262464	0.0146864	0.0253618	0.00170842
650	1,2-Dipalmitoyl-sn-glycero-3-phospho-(1'-rac-glycerol)	2.71	level2			721.503	25.9	NEG	C38H75O10P			185463-23-4		Lipids and lipid-like molecules	脂质和类脂分子	Glycerophospholipids	甘油磷脂类	Glycerophosphoglycerols	甘油磷酸甘油	BIABMEZBCHDPBV-BEBVUIBBSA-N	0.00497466	0.00404313	0.00155673	0.00273368	0.00278343	0.00164611	0.0191562	0.00961282	0.0383791	0.0242813	0.000502181	0.00920712	0.0136286	0.0200854	0.0192866	0.0907007	0.00923341	0.0184924	0.024033	0.00168628	0.0158011	0.0399076	0.0926805	0.00549442	0.0423106	0.00246828	0.00263678	0.0633827	0.00127542
655	(1,3,5-Trimethyl-1H-pyrazol-4-yl)methanol	2.71	level2			141.102	18.8	POS	C7H12N2O			18712-39-5		Organoheterocyclic compounds	有机杂环化合物	Azoles	吡咯类	Pyrazoles	吡唑	CIZQKYSGJAQKTI-UHFFFAOYSA-N	0.507472	0.109792	0.437214	0.77302	0.0897491	0.0844295	0.350744	0.105981	0.394248	0.0917906	0.0889981	0.161539	0.0802125	0.0939843	0.406067	0.18011	0.355833	0.0826563	0.399952	0.0986183	0.244621	0.100701	0.138269	0.0961803	0.0974746	0.0889313	0.0882187	0.0824657	0.0887632
662	Chrysin	2.71	level2			255.091	154.7	POS	C15H10O4	HMDB0036619		480-40-0	C10028	Phenylpropanoids and polyketides	苯丙素类和聚酮类	Flavonoids	黄酮类	Flavones	黄酮	RTIXKCRFFJGDFG-UHFFFAOYSA-N	0.00275132	0.00618645	0.00958048	0.0167301	0.00724932	0.00272922	0.0108431	0.00376842	0.00311856	0.00939414	0.00557461	0.00268084	0.00756945	0.0176256	0.0106448	0.0049649	0.00111479	0.0171536	0.00343995	0.00737823	0.0075249	0.0108728	0.30244	0.0270211	0.0185167	0.0134348	0.00994341	0.00261167	0.107195
673	PC(31:1)	2.71	level2			718.537	53.7	POS	C39H76NO8P											NLIPNXKQJMHIRD-ROOGKDHUSA-N	0.0560766	0.00532615	0.00179291	0.12364	0.00572338	0.0257654	0.0495832	0.0144584	0.0662306	0.0434891	0.0016075	0.109144	0.0480893	0.130951	0.104981	0.636632	0.104755	0.137968	0.0591951	0.0194621	0.0872435	0.0834585	0.625914	0.0373238	0.0743104	0.00328418	0.0178972	0.150946	0.0116116
732	Arg-Leu	2.69	level2			288.202	208.9	POS	C12H25N5O3			1188-24-5		Organic acids and derivatives	有机酸及其衍生物	Carboxylic acids and derivatives	羧酸及衍生物	Amino acids, peptides, and analogues	氨基酸、肽和类似物	WYBVBIHNJWOLCJ-BDAKNGLRSA-N	0.00472841	0.00217433	0.0010273	0.024223	0.000690663	0.00213527	0.000550983	0.000837012	0.00146806	0.000320959	0.00149188	0.0116733	0.00387921	0.00255997	0.00363145	0.0121587	0.00125861	0.00489868	0.00278536	0.000409882	0.00414515	0.00112875	0.039181	0.00695887	0.00555126	0.000596172	0.00143437	0.000774514	0.00743241
742	3-Dodecyloxypropylamine	2.69	level2			244.263	57.2	POS	C15H33NO			7617-74-5		Organic oxygen compounds	有机含氧化合物	Organooxygen compounds	有机氧化合物	Ethers	醚	ZRJOUVOXPWNFOF-UHFFFAOYSA-N	0.0333273	0.0196158	0.0105499	0.265544	0.00688004	0.0332515	0.0327667	0.0138339	0.039133	0.0222317	0.00728365	0.0380175	0.0219486	7.27281e-06	0.0225773	6.9597e-06	0.0160771	0.014964	0.0211419	0.0188561	0.0319007	0.00015196	0.0178607	0.0302233	4.67634e-05	9.70611e-05	7.34109e-05	0.00620007	4.07575e-05
759	Glu-Asp	2.68	level2			261.073	253.6	NEG	C9H14N2O7	HMDB0028815		3918-84-1		Organic acids and derivatives	有机酸及其衍生物	Peptidomimetics	拟肽类	Hybrid peptides	杂合肽	FYYSIASRLDJUNP-WHFBIAKZSA-N	0.0020186	0.000768046	0.00118441	0.00240367	0.00155152	0.000920228	0.000850901	0.00102564	0.00140956	0.00132196	0.000987584	0.00131479	0.00161356	0.00292026	0.000945364	0.00472399	0.00105106	0.00563273	0.00130755	0.00249621	0.00182238	0.00170044	0.0212748	0.00100003	0.00293395	0.000380167	0.00191793	0.00150244	0.00144588
774	1-Hexadecyl-2-(9Z-octadecenoyl)-sn-glycero-3-phosphoethanolamine	2.68	level2			702.543	77.5	NEG	C39H78NO7P	HMDB0011157		119904-40-4		Lipids and lipid-like molecules	脂质和类脂分子	Glycerophospholipids	甘油磷脂类	Glycerophosphoethanolamines	磷脂酰乙醇胺	JJGMGPGKWYLISM-NPBIGWJUSA-N	0.00100696	0.000693116	0.000261539	1.27469e-05	0.00019082	7.27723e-06	0.00196628	0.000653014	0.00168506	0.000120072	0.000283199	0.000824967	0.00199481	0.00613215	0.00327721	0.00354972	0.0111001	0.00362722	0.00255091	0.000660748	0.0020299	0.0045622	0.0123335	0.00162946	0.00411254	8.15558e-06	0.000638559	0.00251971	7.24178e-05
798	LPE(22:4)	2.67	level2			530.323	109.9	POS	C27H48NO7P	HMDB0011523	二十二碳四烯酰基甘油磷酸乙醇胺			Lipids and lipid-like molecules	脂质和类脂分子	Glycerophospholipids	甘油磷脂类	Glycerophosphoethanolamines	磷脂酰乙醇胺	NJHKGJJIKOCCMZ-YMIVKDKMSA-N	0.0114909	0.00127779	0.000970205	0.00107186	0.000471303	0.000412393	0.00476018	0.00377022	0.000900158	0.000926472	9.19025e-05	0.0280094	0.00263614	0.00536032	0.00399351	0.0126421	0.00159652	0.00639758	0.00154744	0.00155139	0.00449389	0.00418095	0.0795152	0.00410338	0.00782598	0.000292537	0.00032457	0.00541564	0.000702982
824	Methylgallate	2.66	level2			183.03	39.7	NEG	C8H8O5	HMDB0254590										FBSFWRHWHYMIOG-UHFFFAOYSA-N	0.0153145	0.0459243	0.253623	0.0997247	0.0100463	0.456337	0.195816	0.0123626	0.018307	0.0303786	0.0239096	0.0942861	0.00671683	0.0125786	0.0176717	0.0238086	0.0495591	0.010417	0.056823	0.0204298	0.0727017	0.00769817	0.0253892	0.00583866	0.0040344	0.00900778	0.00204434	0.0231511	0.00905345
841	6-Chloro-5-fluoro-1H-1,3-benzodiazol-2-amine	2.65	level2			184.007	15.5	NEG	C7H5ClFN3			142356-64-7		Organoheterocyclic compounds	有机杂环化合物	Benzimidazoles	苯并咪唑类	Benzimidazoles	苯并咪唑类	BLXGHUSEUDLUBK-UHFFFAOYSA-N	0.0173444	0.00999783	0.00468343	0.0664469	0.0105168	0.0224122	0.00557123	0.00395496	0.00775053	0.0110612	0.0253009	0.0972629	0.0253478	0.0187771	0.0126091	0.0215753	0.00422586	0.0326445	0.0111651	0.0331078	0.0220878	0.00267735	0.000189178	0.00911323	0.0137114	0.00385878	0.0660372	0.0529795	0.0103657
858	4-Amino-2-oxo-1,2-dihydropyrimidine-5-carboxylic acid	2.64	level2			154.026	49	NEG	C5H5N3O3	HMDB0246202		3650-93-9		Organoheterocyclic compounds	有机杂环化合物	Diazines	二氮杂苯	Pyrimidines and pyrimidine derivatives	嘧啶类和嘧啶类衍生物	BLQMCTXZEMGOJM-UHFFFAOYSA-N	0.0850722	0.165416	0.141378	0.193992	0.133519	0.142533	0.180205	0.0732397	0.118102	0.08989	0.12644	0.263071	0.195577	0.115115	0.127555	0.12742	0.129225	0.094215	0.0946614	0.0673892	0.133201	0.15664	0.0473308	0.137543	0.0516986	0.0107111	0.0777704	0.10354	0.0769811
885	PC(38:1)	2.63	level2			816.642	44.4	POS	C46H90NO8P											PTIPMXWQZWSDTJ-ALNNFZMXSA-N	0.00311976	0.000250457	7.73968e-06	5.49296e-05	0.000100536	0.000583249	0.00225379	0.000557567	0.00120745	0.000960266	6.40003e-06	0.00848923	0.00664385	0.0171993	0.00993565	0.0544482	0.00827361	0.0177626	0.00210805	0.000936707	0.00674497	0.000988981	0.147651	0.00221543	0.00424097	6.4774e-06	0.000172154	0.00412527	0.000471171
898	N-(2,4-Dihydroxyphenacyl)phthalimide	2.62	level2			296.054	60.1	NEG	C16H11NO5			65190-77-4		Organic oxygen compounds	有机含氧化合物	Organooxygen compounds	有机氧化合物	Carbonyl compounds	羰基化合物	AAFOAJIKSOVZAS-UHFFFAOYSA-N	0.0278511	0.0065417	0.036777	0.00800729	0.0101561	0.00032077	0.00674777	0.040474	0.00819579	0.0119617	0.00484162	0.00848743	0.0131876	0.0146204	0.010654	0.0498277	0.00587891	0.026394	0.0134458	0.0101284	0.015725	0.0214324	0.0547395	0.0116567	0.020133	0.00443877	0.0228827	0.00568127	0.0205294
954	3.beta.,7.alpha.-Dihydroxy-5-cholestenoic acid	2.59	level2			431.312	18.1	NEG	C27H44O4			115538-84-6		Lipids and lipid-like molecules	脂质和类脂分子	Steroids and steroid derivatives	甾类和甾类衍生物	Bile acids, alcohols and derivatives	胆汁酸类、醇类及其衍生物	GYJSAWZGYQXRBS-XTQLREFJSA-N	0.232296	0.557293	0.391518	0.767537	0.358911	0.139775	0.5086	0.515455	0.58811	0.475903	0.550653	0.2254	0.364093	0.354885	0.498374	0.42089	0.470922	0.37199	0.503237	0.505939	0.440089	0.561774	0.197997	0.280951	0.431934	0.41888	0.490997	0.45077	0.264998
994	GKK 1032B	2.57	level2			500.278	111	NEG	C32H39NO4			358375-11-8		Lipids and lipid-like molecules	脂质和类脂分子	Fatty Acyls	脂肪酰类	Eicosanoids	类花生酸	GAPPHVJLWSRLAC-UHFFFAOYSA-N	0.0385536	0.00555996	0.00447554	0.000686247	0.000797584	0.000873745	0.0122306	0.0112901	0.00114499	0.00367849	8.53913e-06	0.0436042	0.0147168	0.0174094	0.00566128	0.0267977	0.00519743	0.088579	0.00776519	0.00538699	0.0147209	0.0132829	0.1742	0.0235945	0.0267042	0.00317226	0.00189551	0.0136739	0.00901221
996	2-Hydroxy-6-methyl-4-(trifluoromethyl)nicotinonitrile	2.57	level2			201.026	85.9	NEG	C8H5F3N2O			654-49-9		Organoheterocyclic compounds	有机杂环化合物	Pyridines and derivatives	吡啶及衍生物	3-pyridinecarbonitriles	3-氰基吡啶	IMPQPQKUDMOZHV-UHFFFAOYSA-N	0.251367	0.208345	0.149618	0.124869	0.193841	0.0868763	0.117796	0.164854	0.0948513	0.163947	0.106757	0.201201	0.147465	0.337579	0.127402	0.477797	0.119348	0.189761	0.253871	0.198825	0.185818	0.158526	1.00706	0.152912	0.169021	0.138478	0.225246	0.209113	0.197503
997	5-(4-Hydroxyphenyl)-5-phenylhydantoin	2.57	level2			267.075	82.4	NEG	C15H12N2O3	HMDB0041905		2784-27-2		Organoheterocyclic compounds	有机杂环化合物	Azolidines	氮杂环戊烷	Imidazolidines	咪唑烷	XEEDURHPFVXALT-UHFFFAOYSA-N	0.00315299	0.00679644	0.00471989	0.00863528	0.00368402	0.00207767	0.00750999	0.0361656	0.00151236	0.00451451	0.00289085	0.0331973	0.0066129	0.00485907	0.00366336	0.00386227	0.00202658	0.0138655	0.00452162	0.00192004	0.00780941	0.0090907	0.0220807	0.00553002	0.0162838	0.00674372	0.00728082	0.00371693	0.0104719
1004	Sanguinarine	2.57	level2			332.095	211.7	POS	C20H14NO4	HMDB0029367		2447-54-3	C06162	Alkaloids and derivatives	生物碱和衍生物	Benzophenanthridine alkaloids	苯并菲啶生物碱	Quaternary benzophenanthridine alkaloids	季铵类苯并啡啶类生物碱	INVGWHRKADIJHF-UHFFFAOYSA-N	0.029949	0.00771714	0.0245498	0.0583726	0.0267996	0.0233043	0.00679665	0.0404305	0.00647331	0.0123865	0.00331	0.0187917	0.0142242	0.0313581	0.0105873	0.0580725	0.00507396	0.025376	0.0104956	0.0364387	0.0225254	0.024741	0.09218	0.010163	0.0253074	0.00571497	0.0175762	0.0165364	0.0208576
1091	Codeine	2.52	level2			300.155	175.2	POS	C18H21NO3			76-57-3		Alkaloids and derivatives	生物碱和衍生物	Morphinans	吗啡	Morphinans	吗啡	OROGSEYTTFOCAN-SQXROVMKSA-N	0.00714213	0.00165589	0.000697956	0.0129774	0.000953017	0.00251738	0.00104332	0.00303944	0.00245019	0.00450953	0.00231704	0.00246413	0.0152916	0.00606876	0.00148715	0.0146731	0.00071729	0.00228357	0.000909275	0.00300504	0.00431016	0.00102512	0.0963004	0.00266986	0.0118581	0.000772288	0.000954118	0.00128473	0.000550826
1117	(2-aminoethoxy)[2-[docosa-4.7.10.13.16.19-hexaenoyloxy]-3-[hexadec-1-en-1-yloxy]propoxy]phosphinic acid	2.51	level2			746.513	38.9	NEG	C43H74NO7P	HMDB0005780		206059-97-4	C00350	Lipids and lipid-like molecules	脂质和类脂分子	Glycerophospholipids	甘油磷脂类	Glycerophosphoethanolamines	磷脂酰乙醇胺	WVGALBKSWOUIEZ-XNHMFJFDSA-N	0.0159347	0.0164306	0.00489362	0.00822207	0.00825274	0.00909576	0.0320011	0.0221467	0.0234214	0.0238059	0.00444948	0.0457958	0.016217	0.0352902	0.0408232	0.142519	0.0552622	0.0284071	0.0165425	0.0114352	0.0280473	0.0268652	0.206906	0.0238733	0.0410055	0.00161258	0.0162846	0.0328529	0.0107462
1125	Farnesylthiosalicylic acid	2.5	level2			359.204	254.4	POS	C22H30O2S			162520-00-5		Lipids and lipid-like molecules	脂质和类脂分子	Prenol lipids	异戊烯醇脂类	Sesquiterpenoids	倍半萜类	WUILNKCFCLNXOK-CFBAGHHKSA-N	0.0075688	0.0029383	0.00271658	0.038913	0.0029424	0.00110829	0.00560811	0.0155382	0.0189017	0.00784017	0.00277914	0.0283013	0.00370269	0.00284423	0.00179477	0.0234369	0.00298962	0.00690173	0.00446372	0.00333718	0.00923134	0.00337705	0.108528	0.00324855	0.0335513	0.00211183	0.00067173	0.0359511	0.00142962
1139	PC(18:1(9Z)/18:0)	2.49	level2			788.615	77.5	POS	C44H86NO8P	HMDB0008069			C00157	Lipids and lipid-like molecules	脂质和类脂分子	Glycerophospholipids	甘油磷脂类	Glycerophosphocholines	甘油磷酸胆碱	VSQJLPDEJFLZDH-ASXRIEHBSA-N	0.001511	7.35748e-06	7.57088e-05	5.49296e-05	3.4438e-05	0.000311104	0.00233098	0.00106983	0.00186246	0.00122164	6.40003e-06	0.00433074	0.00381935	0.0199221	0.00571776	0.0332636	0.00787415	0.00590405	0.00649265	0.000531072	0.00481707	0.00275417	0.0560858	0.00155644	0.00518835	0.000175701	0.000751401	0.00787127	0.000387893
1250	N-(2-Furanylmethyl)adenosine	2.37	level2			346.112	13.9	NEG	C15H17N5O5			4338-47-0		Nucleosides, nucleotides, and analogues	核苷、核苷酸和类似物	Purine nucleosides	嘌呤核苷类	Purine nucleosides	嘌呤核苷类	CAGLGYNQQSIUGX-SDBHATRESA-N	0.0266313	0.0393767	0.0180564	0.0227006	0.00640642	7.27723e-06	0.0200946	0.0544751	0.0279525	0.00160835	0.139517	0.0526417	0.0380426	0.00643657	0.0144207	0.00460873	0.0475703	0.00433074	0.00926364	0.0246717	0.0279407	0.00261417	0.00678562	0.00555334	0.0262115	0.00128663	0.0264261	0.0135839	0.0374217
1256	PC(15:0/20:1(11Z))	2.36	level2			774.608	22.5	POS	C43H84NO8P	HMDB0007945				Lipids and lipid-like molecules	脂质和类脂分子	Glycerophospholipids	甘油磷脂类	Glycerophosphocholines	甘油磷酸胆碱	TYQXQGGTOWQUKL-HFWGUVFESA-N	0.00247762	7.35748e-06	7.73968e-06	5.49296e-05	6.6035e-06	0.00449227	0.00428715	0.00201947	0.011835	0.0112307	0.000402083	0.00342037	0.00884005	0.016464	0.00475368	0.0476376	0.00381889	0.0117883	0.0120879	7.01008e-06	0.00728194	0.0104505	0.0948681	0.0017176	0.0098376	0.00118692	0.000473724	0.0121603	6.97649e-06
1266	Myricanol_5-beta-sophoroside	2.35	level2			683.297	257.3	POS	C33H46O15	HMDB0036529		116107-17-6		Phenylpropanoids and polyketides	苯丙素类和聚酮类	Diarylheptanoids	二苯庚烷类	Cyclic diarylheptanoids	环状二苯庚烷类	MWHPGFTUVBRCFT-UHFFFAOYSA-N	0.000234102	2.49467e-05	2.99628e-05	5.49296e-05	4.1171e-05	6.35635e-06	2.04886e-05	0.000182025	6.63944e-06	6.73331e-06	6.40003e-06	0.000821624	0.000195959	0.000110019	0.000120384	0.00100701	6.61437e-05	0.00036112	2.85469e-05	0.000155564	0.000174006	7.3684e-06	0.00162781	9.75418e-05	0.000547507	6.4774e-06	6.4469e-06	3.33729e-05	0.000192859
1267	1-Amino-9,10-dioxo-4-(phenylamino)-9,10-dihydroanthracene-2-sulfonic acid	2.35	level2			395.069	225.6	POS	C20H14N2O5S			2786-71-2		Benzenoids	苯环型化合物	Anthracenes	蒽类	Anthraquinones	蒽醌	OPBOOIFXQHPAPJ-UHFFFAOYSA-N	0.0139273	0.00561865	0.00552059	0.00103461	0.00908047	0.0113197	0.00810863	0.0149712	0.0101439	0.00538724	0.00730915	0.0114632	0.00800568	0.00774461	0.0104701	0.00458802	0.00895567	0.00860797	0.00824696	0.00928415	0.0084894	0.00757886	0.0116006	0.00760309	0.00957059	0.0256524	0.00680826	0.0155348	0.00924217
1274	Calcimycin	2.34	level2			524.274	111.3	POS	C29H37N3O6	HMDB0249542		52665-69-7		Organoheterocyclic compounds	有机杂环化合物	Benzoxazoles	苯并恶唑	Benzoxazoles	苯并恶唑	HIYAVKIYRIFSCZ-UHFFFAOYSA-N	0.00921005	0.00117292	0.000718443	0.00187457	0.000251956	0.000463036	0.0032255	0.0025569	0.000811791	0.000742104	7.5796e-05	0.0197839	0.00402556	0.00328585	0.00194618	0.00244809	0.0025306	0.00595786	0.00264798	0.00106908	0.00323991	0.00310836	0.031464	0.00376536	0.00574401	0.000624877	0.00029438	0.00267664	0.00208999
1275	Drostanolone propionate	2.34	level2			361.273	110.6	POS	C23H36O3			521-12-0		Lipids and lipid-like molecules	脂质和类脂分子	Steroids and steroid derivatives	甾类和甾类衍生物	Steroid esters	甾酯	NOTIQUSPUUHHEH-UXOVVSIBSA-N	0.00102304	0.00038701	7.73968e-06	0.000815078	6.6035e-06	6.35635e-06	9.73604e-05	6.88022e-05	6.63944e-06	6.73331e-06	6.40003e-06	0.00212574	0.000226381	0.000389435	6.71202e-06	0.000218177	4.06216e-05	0.000734187	0.000104557	7.01008e-06	0.000314229	0.000137254	0.00584837	0.000135035	0.00049133	6.4774e-06	6.4469e-06	0.000332245	6.40699e-05
1314	SM(d18:0/18:0)	2.32	level2			733.621	102.5	POS	C41H85N2O6P	HMDB0012087			C00550	Lipids and lipid-like molecules	脂质和类脂分子	Sphingolipids	鞘脂类	Phosphosphingolipids	鞘磷脂	JCELSEVNSMXGKA-IOLBBIBUSA-N	0.00452288	0.00122349	0.00128805	0.0130472	0.00788811	0.00262335	0.00906638	0.00653939	0.0124098	0.0055602	0.00161993	0.0244209	0.0160591	0.0110349	0.0182395	0.0563322	0.0531942	0.0105771	0.0234101	0.00198228	0.014052	0.00771493	0.0685892	0.00688247	0.0272932	0.000680751	0.00568226	0.0300738	0.00244029
1327	PC(18:2(9Z,12Z)/20:0)	2.31	level2			814.63	41.5	POS	C46H88NO8P	HMDB0008143				Lipids and lipid-like molecules	脂质和类脂分子	Glycerophospholipids	甘油磷脂类	Glycerophosphocholines	甘油磷酸胆碱	IMVSFXGBZBLWFA-FMJYHZMHSA-N	0.0102752	0.00108802	0.00142392	0.00714912	0.00198008	0.00465555	0.0124677	0.0071778	0.00872455	0.00869764	0.00052087	0.0517244	0.0260559	0.0675879	0.0344118	0.248845	0.0278727	0.049044	0.0229566	0.00578696	0.0299223	0.0139849	0.465524	0.0122718	0.0466618	0.000754179	0.00650918	0.0136668	0.00531503
1360	3-(Methylsulfanyl)aniline	2.28	level2			140.053	78.4	POS	C7H9NS			1783-81-9		Organosulfur compounds	有机硫化合物	Thioethers	硫醚类	Aryl thioethers	芳基硫醚	KCHLDNLIJVSRPK-UHFFFAOYSA-N	0.0013006	0.0017996	0.0219702	0.0557411	0.00470097	0.00139789	0.0129176	0.00459701	0.0202313	0.00246152	0.00100221	0.0093886	0.00229333	0.00163759	0.00106264	0.015778	0.00186282	0.00615142	0.00788211	0.00134453	0.00877605	0.0333674	0.0475953	0.0176686	0.0321988	0.0106606	0.00267071	0.00362129	0.00982059
1366	PC(15:0/P-18:0)	2.28	level2			732.587	77.4	POS	C41H82NO7P	HMDB0007962				Lipids and lipid-like molecules	脂质和类脂分子	Glycerophospholipids	甘油磷脂类	Glycerophosphocholines	甘油磷酸胆碱	FZEIOAGQYWVXTC-NECWGFRUSA-N	0.00179922	7.35748e-06	7.73968e-06	5.49296e-05	7.58133e-05	0.000674604	0.0034183	0.00146264	0.00143587	0.000768829	6.40003e-06	0.000473068	0.00190924	0.0161865	0.00663049	0.00317634	0.00421265	0.00771321	0.00274188	0.00142142	0.00270883	0.0035044	0.0238568	0.00178772	0.00390398	3.72237e-05	6.4469e-06	0.00228444	0.000242557
1384	S-(4-Fluorophenyl)mercapturic acid	2.26	level2			256.045	225.7	NEG	C11H12FNO3S			331-93-1		Organic acids and derivatives	有机酸及其衍生物	Carboxylic acids and derivatives	羧酸及衍生物	Amino acids, peptides, and analogues	氨基酸、肽和类似物	MMFMNCSNACXBFZ-UHFFFAOYSA-N	0.0270091	0.0244863	0.0194709	0.00603008	0.0323133	0.0321138	0.0285077	0.0344422	0.0309091	0.027111	0.0271425	0.0211395	0.027033	0.0250607	0.0328058	0.0223776	0.0346012	0.0259585	0.0282618	0.0267504	0.0266762	0.0266722	0.0261163	0.0240313	0.0319568	0.0640394	0.0254206	0.0450414	0.034134
1388	Frangulin B	2.26	level2			401.088	31.9	NEG	C20H18O9			14101-04-3		Benzenoids	苯环型化合物	Anthracenes	蒽类	Anthraquinones	蒽醌	AEQMIFRODRFTJF-UHFFFAOYSA-N	0.00351589	0.00162229	0.00123291	0.00476726	0.00146386	0.0016953	0.0013181	0.00123558	0.000988715	0.00280704	0.00400856	0.00142911	0.000828218	0.000936497	0.00118501	0.000541991	0.00113807	0.00162683	0.0013977	0.0019399	0.00178394	0.00218663	0.000639932	0.0012551	0.0014004	0.00100814	0.000605162	0.00109842	0.0012955
1425	2-Bromo-5-(pyrrolidin-1-yl)pyrazine	2.24	level2			228.01	154.9	POS	C8H10BrN3			1001050-21-0		Organic nitrogen compounds	有机含氮化合物	Organonitrogen compounds	有机氮化合物	Amines	胺	OJPYLBAZSVUCNX-UHFFFAOYSA-N	0.00984269	0.00379906	0.0136018	0.00142601	0.0127215	0.0087167	0.0110605	0.00949633	0.0113906	0.00424781	0.00982759	0.0187893	0.0175467	0.00789305	0.0120374	0.00785859	0.0119248	0.00848507	0.00858592	0.00814273	0.00986972	0.00975432	0.00472292	0.00956434	0.00607498	0.00213799	0.00845299	0.010874	0.00932822
1440	CRUSTECDYSONE	2.24	level2			503.295	111.3	POS	C27H44O7	HMDB0030180		5289-74-7		Lipids and lipid-like molecules	脂质和类脂分子	Steroids and steroid derivatives	甾类和甾类衍生物	Bile acids, alcohols and derivatives	胆汁酸类、醇类及其衍生物	NKDFYOWSKOHCCO-YPVLXUMRSA-N	0.0171962	0.00224338	0.00172785	0.0365272	0.0031146	0.000793214	0.0052851	0.00493931	0.000722779	0.00131596	0.00148673	0.0391613	0.00728797	0.00800623	0.00245615	0.0120654	0.00199402	0.0124902	0.00696927	0.00413354	0.00849582	0.00569591	0.102639	0.00996693	0.0113013	0.000995805	0.000665448	0.00481677	0.0037867
1448	SM(d18:1/24:0)	2.23	level2			815.691	104.4	POS	C47H95N2O6P					Lipids and lipid-like molecules	脂质和类脂分子	Sphingolipids	鞘脂类	Phosphosphingolipids	鞘磷脂	QEDPUVGSSDPBMD-XTAIVQBESA-O	0.0223628	0.00276018	0.00227276	0.0395985	0.00368946	0.005186	0.0162525	0.0117864	0.00665409	0.00868947	0.000729144	0.0351694	0.016511	0.0506545	0.0366412	0.0896618	0.0177279	0.0399545	0.013779	0.0128188	0.021645	0.0136066	0.292159	0.014348	0.033733	0.000823922	0.00396771	0.0184596	0.00565063
1451	PE(P-16:0/18:1(9Z))	2.23	level2			702.542	51.8	POS	C39H76NO7P	HMDB0011342		65289-02-3		Lipids and lipid-like molecules	脂质和类脂分子	Glycerophospholipids	甘油磷脂类	Glycerophosphoethanolamines	磷脂酰乙醇胺	ZVVYJAAMWXATNY-PRWZWGSOSA-N	0.210002	0.0238379	0.0198955	0.155864	0.0218431	0.0769202	0.331191	0.0680922	0.236651	0.159074	0.0225047	0.658881	0.204001	0.530292	0.330453	1.11188	1.04923	0.254512	0.217946	0.0582794	0.287068	0.345313	2.26778	0.230078	0.562631	0.0234359	0.089549	0.394153	0.0320963
1462	PC(22:2(13Z,16Z)/P-18:0)	2.23	level2			826.666	42.3	POS	C48H92NO7P	HMDB0008620				Lipids and lipid-like molecules	脂质和类脂分子	Glycerophospholipids	甘油磷脂类	Glycerophosphocholines	甘油磷酸胆碱	WTPAHBSLQUJOMF-DJBJHQTKSA-N	0.011053	7.42394e-05	0.000246539	5.49296e-05	0.000950211	0.00482762	0.020182	0.00574149	0.00279912	0.0072078	6.40003e-06	0.0295406	0.0210769	0.069363	0.0273007	0.187847	0.014522	0.0466942	0.00807491	0.00399754	0.023078	0.0178271	0.411201	0.00816801	0.0235589	0.000222238	0.00357263	0.00502346	0.00282457
1471	N-Isobutyl-3-nitrobenzenesulfonamide	2.22	level2			257.063	140.6	NEG	C10H14N2O4S			89840-73-3		Benzenoids	苯环型化合物	Benzene and substituted derivatives	苯和取代衍生物	Benzenesulfonamides	苯磺酰胺	OTEHHZRWGMPOJL-UHFFFAOYSA-N	0.0162357	0.00307037	0.0194877	0.000673568	0.00967447	0.0109136	0.0204384	0.00712228	0.000706056	0.016027	0.00368217	0.00887393	0.00170103	0.0153337	0.00251543	0.0413408	0.000811388	0.00235836	0.00561612	0.00943631	0.00980092	0.0186967	0.101556	0.00306684	0.0807243	0.00189155	0.00416585	0.0165884	0.00565117
1482	(2-aminoethoxy)[2-[octadec-9-enoyloxy]-3-(octadecanoyloxy)propoxy]phosphinic acid	2.22	level2			744.556	58.8	NEG	C41H80NO8P	HMDB0008993										JQKOHRZNEOQNJE-DJEJVYNPSA-N	0.0504258	0.00387958	0.0057934	0.00610289	0.0150386	0.0302462	0.044944	0.0317103	0.0323708	0.027346	0.00224921	0.0609771	0.0678287	0.200595	0.148746	0.439736	0.114528	0.229274	0.0773573	0.0369062	0.0813028	0.0426682	0.799852	0.0734779	0.138307	0.00491963	0.0154282	0.0575168	0.0274341
1483	Nitrofurazone	2.22	level2			197.031	49	NEG	C6H6N4O4	HMDB0014480		59-87-0	C08042	Organoheterocyclic compounds	有机杂环化合物	Furans	呋喃	Nitrofurans	硝基呋喃	IAIWVQXQOWNYOU-FPYGCLRLSA-N	5.08052	9.97031	8.20146	11.5503	7.76407	8.38149	10.7747	4.24704	7.18974	5.3937	7.70067	15.0276	11.5539	6.69372	7.53806	7.67251	7.51305	5.46994	5.70671	3.87722	7.86534	9.15579	2.89327	8.12286	3.13088	0.565444	4.64113	5.7792	4.51065
1514	Faradiol_laurate	2.2	level2			625.551	105.5	POS	C42H72O3	HMDB0034840		270078-40-5		Lipids and lipid-like molecules	脂质和类脂分子	Prenol lipids	异戊烯醇脂类	Triterpenoids	三萜类	NKKIRZWINJADJC-UHFFFAOYSA-N	0.0105229	0.00110842	0.000292687	0.0445389	0.00825674	0.0261864	0.0131656	0.00509515	0.0227103	0.0275248	0.00110156	0.00514665	0.0381911	0.107618	0.0204085	0.127786	0.035206	0.0602304	0.0597367	0.0091073	0.0311967	0.0184072	0.94482	0.0103373	0.0448567	0.00143378	0.0107839	0.0833593	0.00203012
1546	4-Hydroxyphenylmaraviroc	2.17	level2			528.31	109.6	NEG	C29H41F2N5O2			856708-54-8		Alkaloids and derivatives	生物碱和衍生物	Tropane alkaloids	托品烷生物碱	Tropane alkaloids	托品烷生物碱	FWOMXCBURQJRQH-UHFFFAOYSA-N	0.00728375	0.000926949	0.000776534	1.27469e-05	0.000320414	0.000573051	0.00570758	0.00259012	0.000645549	0.000689436	8.53913e-06	0.0106193	0.00233437	0.00563248	0.00212848	0.00815274	0.0013993	0.0068064	0.00127352	0.00102535	0.00294533	0.0032007	0.0386619	0.003291	0.00617778	0.00013929	7.94877e-06	0.00461882	0.000708158
1549	6,8-Di-O-methylaverufin	2.17	level2			397.133	154.5	POS	C22H20O7	HMDB0035465		61470-56-2		Benzenoids	苯环型化合物	Anthracenes	蒽类	Anthraquinones	蒽醌	UOWSTUZKQCORDT-UHFFFAOYSA-N	0.0216464	0.014048	0.029259	0.0301576	0.0307666	0.0230145	0.0355041	0.0234396	0.0316687	0.0150103	0.0270804	0.0545195	0.044605	0.0194864	0.0317669	0.017596	0.0311637	0.0175889	0.0204372	0.0187887	0.0268774	0.0269723	0.00984477	0.0285516	0.010105	0.00325903	0.0185866	0.0223181	0.0193432
1556	2-Phenyl-1,3-thiazole-4-carboxylic acid	2.16	level2			204.014	155.1	NEG	C10H7NO2S			7113-10-2		Organoheterocyclic compounds	有机杂环化合物	Azoles	吡咯类	Thiazoles	噻唑	IBUSLNJQKLZPNR-UHFFFAOYSA-N	0.0127774	0.0108818	0.0182077	0.0047826	0.0230227	0.0136544	0.0217194	0.0181265	0.0180342	0.0106436	0.0166039	0.0208717	0.0239247	0.0157197	0.0194421	0.0140898	0.0189772	0.014065	0.0139179	0.0135817	0.0161522	0.0182702	0.00974803	0.0128883	0.0119445	0.00351924	0.0132083	0.0228825	0.0158523
1588	PC(18:0/15:0)	2.14	level2			748.575	78.3	POS	C41H82NO8P	HMDB0008033				Lipids and lipid-like molecules	脂质和类脂分子	Glycerophospholipids	甘油磷脂类	Glycerophosphocholines	甘油磷酸胆碱	FHENRYRLCPXONH-LDLOPFEMSA-N	0.000932557	7.35748e-06	7.73968e-06	5.49296e-05	6.6035e-06	5.08651e-05	0.00188593	0.000629659	0.000656038	0.000503534	6.40003e-06	1.19552e-05	0.00130243	0.00646763	0.00233812	0.00330487	0.00301277	0.00254756	0.00113474	0.000667813	0.00127647	0.0011624	0.0196029	0.000967547	0.00258095	6.4774e-06	6.4469e-06	0.00125355	3.74026e-05
1592	4(3H)-Quinazolinone, 2-[(6-amino-9H-purin-9-yl)methyl]-5-methyl-3-(2-methylphenyl)-	2.13	level2			396.153	152.8	NEG	C22H19N7O	HMDB0253339		371242-69-2		Organoheterocyclic compounds	有机杂环化合物	Imidazopyrimidines	咪唑并嘧啶	Purines and purine derivatives	嘌呤和嘌呤衍生物	GNWHRHGTIBRNSM-UHFFFAOYSA-N	0.000503201	5.40387e-05	0.000215001	0.00133943	0.000416011	0.000179467	8.24451e-06	0.000725308	0.000248432	0.000391158	5.49158e-05	0.00060138	0.000108929	0.000474948	5.58412e-05	0.000991115	7.78735e-06	0.000698467	0.000148622	0.000679838	0.000395107	0.00042257	0.00120472	0.0003345	0.000795719	0.00029544	0.000200755	0.000313702	0.000344319
1594	Methyl 6-(acetyloxy)-1,3,7,11-tetrahydroxyabieta-8,11,13-trien-18-oate	2.13	level2			435.198	98.7	NEG	C23H32O8			1379770-35-0		Lipids and lipid-like molecules	脂质和类脂分子	Steroids and steroid derivatives	甾类和甾类衍生物	Hydroxysteroids	羟类固醇	VUPPXNVTSLGJHE-UHFFFAOYSA-N	0.00250759	8.89294e-06	0.000221504	1.27469e-05	0.00147609	0.000100399	0.000113903	0.00360452	0.000310269	8.6553e-06	8.53913e-06	0.00119419	9.94686e-05	0.000783704	7.91846e-05	0.00289831	7.78735e-06	0.00281553	8.22997e-06	0.00152835	0.000889393	0.00110022	0.00375534	8.97142e-05	0.000919888	8.15558e-06	0.000494272	0.0022358	0.001097
1623	2,2'-Bipyridine-4,4'-dicarboxylic acid	2.1	level2			243.038	95	NEG	C12H8N2O4			6813-38-3		Organoheterocyclic compounds	有机杂环化合物	Pyridines and derivatives	吡啶及衍生物	Bipyridines and oligopyridines	联吡啶类和低聚吡啶类	FXPLCAKVOYHAJA-UHFFFAOYSA-N	0.0172757	0.0167388	0.015024	0.02878	0.0181316	0.0201106	0.0180215	0.0180561	0.0203165	0.0157473	0.0181566	0.0153957	0.0192453	0.0146219	0.0192014	0.0150789	0.0183316	0.0153447	0.0178199	0.0182021	0.01798	0.01603	0.0139236	0.0164838	0.0155722	0.0133565	0.0201587	0.0166854	0.0202696
1634	Sulindac sulfone	2.09	level2			373.087	225.6	POS	C20H17FO4S			59864-04-9		Benzenoids	苯环型化合物	Indenes and isoindenes	茚类及异茚类	Indenes and isoindenes	茚类及异茚类	MVGSNCBCUWPVDA-MFOYZWKCSA-N	0.0136563	0.00629206	0.00861224	5.49296e-05	0.0103836	0.0101323	0.00980295	0.0136232	0.0114794	0.00592019	0.00777632	0.0112004	0.00920912	0.010144	0.0105344	0.00416496	0.00948448	0.00870978	0.00830851	0.011159	0.00903241	0.00981216	0.0115938	0.00746449	0.0109796	0.0289696	0.00796469	0.0149593	0.00846828
1640	3-Hydroxy-5-[2-(4-hydroxyphenyl)ethyl]phenyl .beta.-D-glucopyranoside	2.08	level2			391.136	170.7	NEG	C20H24O8			100432-87-9		Phenylpropanoids and polyketides	苯丙素类和聚酮类	Stilbenes	芪类化合物	Stilbene glycosides	芪类糖苷	GMYAXWBDOODSNF-OUUBHVDSSA-N	0.00528852	0.00136697	0.00419538	0.00169508	0.00718368	0.00208608	0.00154233	0.00574083	0.00120153	0.00263037	0.000401149	0.000389549	0.0018227	0.00834431	0.00167187	0.0126694	0.000817368	0.00638065	0.00465849	0.0053594	0.00377228	0.00937161	0.00674715	0.00242657	0.00500963	0.0033186	0.0111539	0.00669287	0.00858636
1678	1-O-beta-D-Glucopyranosyl-2,3-di-O-palmitoylglycerol	2.05	level2			731.577	76.9	POS	C41H78O10	HMDB0031680				Lipids and lipid-like molecules	脂质和类脂分子	Glycerolipids	甘油脂类	Glycosylglycerols	甘油葡萄糖苷	DFUALJIUMYYHRG-UHFFFAOYSA-N	0.00434127	7.78566e-05	7.73968e-06	5.49296e-05	0.00116845	0.00176601	0.00799044	0.00268848	0.00271777	0.00302396	6.40003e-06	0.00299308	0.00587707	0.0269499	0.0129684	0.0133321	0.0104741	0.0103215	0.00542239	0.00328862	0.00577352	0.0066819	0.0431266	0.00462876	0.00732048	0.000375332	0.000991796	0.00721146	0.00129535
1711	Abexinostat	2.01	level2			396.151	101.5	NEG	C21H23N3O5	HMDB0256171		783355-60-2		Organoheterocyclic compounds	有机杂环化合物	Benzofurans	苯并呋喃	Benzofurans	苯并呋喃	MAUCONCHVWBMHK-UHFFFAOYSA-N	0.012382	0.0721915	0.000874021	1.27469e-05	0.013163	0.00139785	0.0185537	0.0609336	0.00862716	0.0695751	0.000816579	0.016397	0.00228825	0.00854453	0.00166684	0.0203499	7.78735e-06	0.0078834	0.00124838	0.00412498	0.0160519	0.0200735	0.0556631	0.00696122	0.0195874	0.00547776	0.00356875	0.0124906	0.00258162
1720	1-(linoleoyl)-sn-glycero-3-phosphoethanolamine	1.94	level3.1			476.278	113.6	NEG	C23H44NO7P											DBHKHNGBVGWQJE-UHFFFAOYSA-N	0.0220577	0.0068798	0.00203478	0.0074688	0.00135282	0.00110551	0.0199165	0.00821398	0.00324909	0.0137726	8.53913e-06	0.0292808	0.00928854	0.0151909	0.00351951	0.0300526	0.00372715	0.0142045	0.00401754	0.0017198	0.00985308	0.00764029	0.0995995	0.0105718	0.00973658	0.000853474	0.000929279	0.00523916	0.00398104
1743	4,5-Dihydrovomifoliol	1.81	level3.1			225.149	44	NEG	C13H22O3											IHDJYDVWNNFPHR-UHFFFAOYSA-N	0.00526573	0.00700222	0.011151	0.011271	0.00683727	0.0135931	0.00926971	0.00600777	0.00616666	0.00493068	0.0077471	0.00584489	0.00605037	0.00805695	0.0079135	0.00514668	0.00815532	0.00802624	0.00736969	0.00660619	0.00762061	0.00574957	0.00402748	0.00904867	0.00654259	0.00703971	0.00950338	0.00582235	0.00735725
1747	S-Sulfanylglutathione	1.8	level3.1			338.048	225.7	NEG	C10H17N3O6S2											QBOLVLBSUGJHGB-UHFFFAOYSA-N	0.0114901	0.0103629	0.00591708	0.000126609	0.0126813	0.0177558	0.00988797	0.0157526	0.0123544	0.0128046	0.0113309	0.00936527	0.0108137	0.00915697	0.015558	0.0116912	0.0154883	0.00996606	0.0133314	0.00920811	0.0112522	0.00912404	0.0114499	0.0115233	0.0134596	0.0269569	0.00934396	0.0215086	0.0178707
1780	N-Glucosylnicotinate [M]	1.68	level3.1			284.082	153.6	NEG	C12H15NO7											CRXJVFIHZPTDKA-UHFFFAOYSA-O	0.0142455	0.00186273	0.0190806	0.00366041	0.00974108	0.00490369	0.0158737	0.00826571	0.000357877	0.0132126	0.00304101	0.0068573	0.00142447	0.0155683	0.00216515	0.0332375	0.000840937	0.00295267	0.00577497	0.0117397	0.00874029	0.0151193	0.0914571	0.002503	0.0835139	0.00346883	0.00441238	0.0207451	0.00518452
1788	PE(P-18:0/22:6(4Z,7Z,10Z,13Z,16Z,19Z))	1.65	level3.1			774.544	39.2	NEG	C45H78NO7P											FIJFPUAJUDAZEY-UHFFFAOYSA-N	0.0186232	0.00900713	0.0034632	0.00367565	0.00739519	0.00940647	0.0387376	0.0199859	0.0185553	0.0248033	0.0029431	0.0435051	0.0164575	0.0639378	0.0400642	0.175772	0.0424615	0.0404715	0.0156208	0.0191231	0.0307005	0.0249328	0.278808	0.0277723	0.0407363	0.00217141	0.0137416	0.0253882	0.0118901
1800	3-Hydroxyhept-4-enoylcarnitine	1.55	level3.1			286.166	86.1	NEG	C14H25NO5											VKIUTEFDGAOUFO-UHFFFAOYSA-N	0.00836255	0.0190511	0.0140454	0.0132183	0.0104579	0.0164171	0.0158033	0.013211	0.0178339	0.0148014	0.0145906	0.0066994	0.0144065	0.0154469	0.0156032	0.0231545	0.0139769	0.0160492	0.0182366	0.0148411	0.0148103	0.0133546	0.0138976	0.01154	0.0136663	0.0109172	0.017476	0.00892375	0.00680674
1801	Indolylmethyl-desulfoglucosinolate	1.52	level3.1			367.099	43.9	NEG	C16H20N2O6S											CWNIQCOMWQROPA-UHFFFAOYSA-N	0.0696796	0.031847	0.201286	0.00576067	0.0964941	0.00153173	0.0194015	0.107811	0.0747261	0.0230059	0.00793852	0.0236267	0.0629483	0.205033	0.062275	0.100463	0.0574455	0.172382	0.0943141	0.186309	0.080214	0.10163	0.0461431	0.0213131	0.303093	0.058226	0.11785	0.239849	0.0981793
1814			level4			187.046	22.1	NEG													0.0060124	0.00802007	0.0119027	0.00261092	0.016514	0.00486502	0.0090709	0.00573686	0.00872649	0.0045442	0.0106511	0.0170997	0.0143126	0.00745053	0.010037	0.00910128	0.0134715	0.022298	0.0168474	0.0106183	0.0104945	0.00967627	0.0109721	0.00397825	0.00931968	0.00824938	0.0145324	0.0052907	0.0170164
1832			level4			198.038	225.6	POS													0.0573615	0.0307918	0.0347245	0.0327852	0.0445574	0.0557061	0.0393152	0.0581154	0.0451265	0.0332083	0.038084	0.0652302	0.0445628	0.0401525	0.0482776	0.0405164	0.0438364	0.0401454	0.0417908	0.0449292	0.0439609	0.0416702	0.0582163	0.0414545	0.0438335	0.0893623	0.0366638	0.0557676	0.0476424
1834			level4			243.062	223.7	NEG													0.00104258	0.00125484	0.00233466	0.00621827	0.00145115	0.00125515	0.000708501	0.00101625	0.000682523	0.000649738	0.000984069	0.00208013	0.000546625	0.00352869	0.000787079	0.00176028	0.0005876	0.0045225	0.000984625	0.00274101	0.00175681	0.00185827	0.0113789	0.00102627	0.00217908	0.000414459	0.00187644	0.00237632	0.00178833
1871			level4			239.04	89.4	NEG													0.0300641	0.0187009	0.0141291	0.0411351	0.0114737	0.0166983	0.0132213	0.0116301	0.00822656	0.0124246	0.0188905	0.0269063	0.0246908	0.0217928	0.0120862	0.0220221	0.0065125	0.0892394	0.0109575	0.0201727	0.0215487	0.0326876	0.0404874	0.0190236	0.0198863	0.0294504	0.012316	0.0326888	0.0219639
1889			level4			194.013	26.6	NEG													0.042702	0.0576606	0.0289981	0.00261817	0.0279735	0.0160624	0.0179705	0.0407743	0.0654955	0.0469275	0.0249617	0.00985753	0.033037	0.155475	0.0227104	0.161464	0.0120578	0.241192	0.0782456	0.0350162	0.05606	0.169446	0.652509	0.083566	0.0503284	0.0669195	0.0952087	0.0528308	0.228543
1973			level4			139.026	155.6	NEG													0.0742454	0.116356	0.100354	0.190572	0.118815	0.246161	0.160479	0.0705891	0.120801	0.0715918	0.1076	0.21005	0.166082	0.0924057	0.116899	0.132827	0.110895	0.0825506	0.104093	0.0662105	0.122979	0.128755	0.0566129	0.0921109	0.0570232	0.0192895	0.0712975	0.127479	0.0736039
1974			level4			215.109	153.1	NEG													0.00955602	0.00777265	0.00777953	0.0128391	0.0109147	0.0116412	0.0102891	0.0116108	0.0108597	0.0124629	0.0099483	0.00721423	0.00676797	0.010568	0.00900486	0.00966798	0.00811088	0.0108947	0.00955993	0.0122299	0.00998462	0.00781905	0.0136097	0.00923614	0.0136578	0.0182241	0.00930221	0.0129411	0.012869
1980			level4			262.093	162.2	NEG													0.0827633	0.0378847	0.079876	0.00817758	0.0733955	0.0214984	0.020439	0.118821	0.0197039	0.0515358	0.0103971	0.012144	0.0314126	0.116817	0.0333137	0.11943	0.0199246	0.0889488	0.0419374	0.0995225	0.0543971	0.0579659	0.131417	0.0606204	0.0570661	0.0221692	0.0716285	0.0519552	0.0772383
2060			level4			280.104	140.6	NEG													0.0164241	0.00381294	0.0208193	0.00820891	0.0151529	0.00717621	0.0159428	0.0111687	0.000988693	0.0122751	0.00381343	0.0058583	0.00220258	0.0204287	0.00343666	0.0498454	0.00117841	0.00403948	0.00595259	0.0123212	0.0110523	0.0218641	0.156541	0.00271849	0.106217	0.00295329	0.00555853	0.0219685	0.0067406
2067			level4			198.027	61.4	NEG													0.00407086	0.0289911	0.0211517	0.050108	0.025132	0.0329266	0.0223774	0.0179299	0.0230615	0.0279724	0.0210136	0.0626916	0.0267743	0.0188115	0.0243163	0.0415552	0.0101885	0.0207783	0.0241136	0.0185657	0.0261265	0.0231788	0.015095	0.028918	0.0221511	0.0102302	0.00262558	0.0182249	0.00754673
4058			level4			495.292	302.6	POS													0.000812302	0.000237481	0.00026937	0.00186086	0.000297187	0.000159293	0.000141714	0.000446945	0.000570211	0.000509022	0.000266295	0.000999075	0.000542869	0.000256304	0.000144703	0.000770852	0.00018984	0.000858899	0.000200973	0.000247888	0.000489104	0.000289149	0.00970101	0.000139835	0.000308359	0.000299508	6.4469e-06	0.00286803	6.39327e-05
4078			level4	Pyridoxal phosphate	0.499308	248.149	302.4	POS													0.00728473	0.005858	0.00312505	0.00569118	0.000438789	0.000736032	0.00239116	0.00259494	0.0077291	0.00198744	0.00131201	0.00175656	0.00285874	0.00133028	0.000751695	0.00224705	0.000447589	0.00273311	0.00284544	0.00152359	0.00278212	0.000405476	0.0581796	0.00279289	0.00380482	0.00485768	0.000693467	0.0238246	0.000383637
4164			level4			248.651	301.4	POS													0.00189399	0.00128084	0.00048868	5.49296e-05	6.6035e-06	3.23335e-05	0.000218661	0.000291926	0.00149314	0.000302284	0.000199702	5.70624e-05	0.00025876	0.000110283	6.71202e-06	0.00020414	6.03329e-06	0.000181106	0.000404786	0.000407006	0.000394949	3.50032e-05	0.01705	0.000697829	0.000981661	0.00103746	1.71908e-05	0.00649404	6.97649e-06
4238			level4	Trioctylamine	17.8789	354.693	300.3	POS													0.00122132	0.000351065	7.73968e-06	5.49296e-05	3.42796e-05	6.35635e-06	6.10878e-06	0.00017182	0.000118802	2.85243e-05	6.40003e-06	1.19552e-05	0.000167813	0.0001345	6.71202e-06	0.000360926	6.03329e-06	0.000153848	0.000247297	6.12213e-05	0.000157883	5.15023e-05	0.000954059	7.40883e-06	0.000580159	0.00057612	6.4469e-06	0.00184425	6.97649e-06
4542			level4	Etiopurpurin	-0.132805	577.792	293.4	POS													0.000555537	0.000223828	0.000325676	0.00517782	0.00443297	0.000399572	0.000545488	0.000843111	0.00171221	0.000466568	0.000486856	0.00163554	0.00153321	0.00112367	0.00123387	0.00296099	0.000122547	0.0026333	0.00155633	0.00253218	0.00152506	0.000412217	0.0100274	0.000526687	0.00270915	0.00158495	0.000729699	0.00175289	0.000848356
4554			level4			511.025	293.3	POS													0.00375368	0.000621771	0.00378415	0.00970998	0.00406264	0.00270855	0.00151585	0.00354348	0.000878911	0.00162087	0.00150374	0.00759797	0.000180294	0.00105135	0.00376579	0.00196683	0.00114841	0.00151449	0.000894283	0.00523678	0.00285299	0.000537266	0.000754949	0.000201348	0.000713264	0.000682004	0.000307178	0.00177483	0.00222928
4697			level4			390.721	291.6	POS													8.04405e-06	0.000711261	0.000425172	5.49296e-05	5.54049e-05	0.000152451	0.000176953	7.65125e-06	0.000377568	0.000651023	6.40003e-06	1.19552e-05	7.29904e-06	0.000154702	6.71202e-06	0.00332826	6.03329e-06	0.000525486	8.16634e-05	0.000568705	0.000365884	7.3684e-06	0.000146952	0.00090744	0.000473854	3.92359e-05	3.43374e-05	0.00335731	6.14144e-05
4847			level4			753.4	290.9	POS													0.00135823	0.000499516	0.000615633	0.00101948	0.00151556	0.000458839	0.000389764	0.000417011	0.000727192	0.0048917	0.000220123	0.000435196	0.0005857	0.000618382	4.68873e-05	0.000993603	0.000135998	0.00150621	0.000775176	0.00230637	0.000975828	0.000383401	0.00689435	0.000277657	0.0156271	7.17002e-05	0.000296536	0.0014266	0.000226058
4864			level4	Selanc	6.94705	752.899	290.7	POS													0.0013084	0.000482298	0.00052386	0.00580869	0.00146715	0.000327415	0.000192745	0.000667579	0.000785708	0.00556932	0.000656457	0.000951669	0.000678869	0.00152583	0.000477988	0.000968381	6.91832e-05	0.00146761	0.00109463	0.00300595	0.00140149	0.00146427	0.0118715	0.000741951	0.0173086	4.15717e-05	0.000549367	0.00188588	0.000303066
4945			level4			806.879	289.9	POS													0.0013676	0.000272203	0.000126425	0.000924439	0.00152409	0.000289944	6.10878e-06	8.7452e-05	0.000140807	0.00034311	0.000105018	0.00317482	0.000357184	0.000790914	0.000182526	0.0019896	4.43664e-05	0.0104759	0.000392332	0.00090696	0.00117509	0.0139857	0.00413502	7.40883e-06	0.00432419	7.79712e-05	0.00247814	0.000673386	0.000311311
4995			level4	TG(15:0/16:1(9Z)/O-18:0)	3.2574	806.377	289.6	POS													0.0019272	0.000254885	0.000246687	0.00409593	0.00213335	0.000561573	6.10878e-06	0.000137669	0.000759098	0.000242062	0.000194672	0.00425227	0.000499136	0.00100711	0.000356858	0.00281032	6.03329e-06	0.0128559	0.000911069	0.00101636	0.00171372	0.0175962	0.0054807	5.34031e-05	0.00445347	6.4774e-06	0.00306773	0.00100476	0.00107951
5257			level4			96.2712	287.9	POS													8.04405e-06	7.35748e-06	7.73968e-06	5.49296e-05	0.00207333	6.35635e-06	6.10878e-06	7.65125e-06	0.000171026	6.73331e-06	6.40003e-06	0.00124833	7.29904e-06	8.02975e-05	6.71202e-06	6.9597e-06	6.03329e-06	0.000289809	0.00016535	0.000258069	0.000221227	0.000389915	0.0016329	7.40883e-06	0.000304278	6.4774e-06	5.97188e-05	0.000588113	0.000301123
5295			level4			475.248	287.5	POS													0.00122876	0.000767762	0.000171354	0.00400352	0.000487062	0.000495562	0.00018482	0.000864373	0.000292342	0.000649784	0.000287248	0.00159396	0.000923396	0.000319787	0.000172162	0.00102697	0.00013942	0.00153684	0.00082571	0.00172704	0.000884894	0.000609387	0.0111112	0.00023091	0.00241947	0.000230544	0.00159526	0.00118715	0.000104486
5296			level4			478.835	287.5	POS													0.0101792	0.0056576	0.00713975	0.0158719	0.00825645	0.00733346	0.00880253	0.0107622	0.0140783	0.00489887	0.0077395	0.00904601	0.0114157	0.00581173	0.0116798	0.00611837	0.0249148	0.00846448	0.0158171	0.00437657	0.00991821	0.0117141	0.0109783	0.00730507	0.00804285	0.0169991	0.00740856	0.0114151	0.0128169
5342			level4			506.27	287.2	POS													0.00505384	0.00291062	0.00356939	0.0179288	0.0150485	0.00268432	0.00140373	0.00349	0.00339557	0.00068714	0.000641123	0.00717444	0.00287959	0.0161936	0.00139455	0.00495105	0.00326409	0.0379994	0.0193878	0.00819813	0.00791278	0.0144007	0.0274209	0.00111531	0.0288912	0.0142554	0.00653418	0.0308593	0.0073364
5355			level4	Atosiban	-12.6501	995.185	287.2	POS													0.00123803	7.35748e-06	7.73968e-06	0.00248228	0.00154729	6.35635e-06	9.83182e-05	0.00235211	0.000134434	0.000142723	6.40003e-06	0.00643417	0.00066894	0.00278941	0.000422165	7.92063e-05	4.5709e-05	0.00745103	0.000747507	0.00418591	0.00154235	0.000929955	0.00284086	0.00023745	0.0154586	5.72152e-05	0.00112337	0.000226782	0.00835872
5356			level4			995.47	287.2	POS													0.000978401	7.35748e-06	9.17199e-05	0.00434816	0.0011125	6.35635e-06	6.10878e-06	0.00141594	6.63944e-06	6.73331e-06	6.40003e-06	0.00218023	0.000249227	0.00201337	0.000161411	6.9597e-06	6.03329e-06	0.00553189	6.99202e-06	0.00196277	0.00100526	0.00154033	0.00115827	7.40883e-06	0.00920318	6.4774e-06	0.000686425	5.93157e-06	0.00487156
5372			level4	PGP(i-22:0/22:6(5Z,8E,10Z,13Z,15E,19Z)-2OH(7S, 17S))	-8.75375	992.186	287.1	POS													0.00214469	0.000239028	0.000820894	0.00144624	0.00262378	0.000595536	0.000619915	0.0019702	0.00127568	0.00104107	0.000588059	0.00933799	0.00109414	0.00384798	0.000742428	0.00221287	3.16881e-05	0.0142776	0.00113609	0.0080842	0.0027065	0.00181914	0.00375923	0.000141448	0.0198004	4.21446e-05	0.00223786	0.00156666	0.0089531
5427			level4			1160.55	286.9	POS													0.000783838	9.65747e-05	0.00011944	5.49296e-05	0.000801973	9.57189e-05	0.000157749	0.000549524	6.63944e-06	6.73331e-06	6.40003e-06	0.00158733	0.000224426	0.00107923	9.27669e-05	6.9597e-06	6.03329e-06	0.00499039	0.000419532	0.00201155	0.000654887	7.3684e-06	0.00128272	6.37346e-05	0.00715834	6.4774e-06	0.000408665	0.000276387	0.0039967
5451			level4	Coenzyme F420	-12.7672	774.59	286.6	POS													0.000812268	8.12644e-05	0.000141468	5.49296e-05	6.6035e-06	0.00010754	0.000102141	0.000740313	6.63944e-06	6.73331e-06	0.000108646	0.00257291	0.000647242	0.00140717	0.000405842	7.53432e-05	7.82249e-05	0.0011037	0.000261982	0.00248372	0.000560234	7.3684e-06	0.00107346	0.000325742	0.00398911	6.4774e-06	0.000661979	0.000278307	0.00360933
5552			level4	21,22-Diprenylpaxilline	13.5074	572.804	285.5	POS													0.00225933	0.00251367	0.00127931	0.00400925	0.00195516	0.00214035	0.00143493	0.00118668	0.00228744	0.00582328	0.00521172	0.0045404	0.00124367	0.00187793	0.00130524	0.00230653	0.00616317	0.000994541	0.00261806	0.00223988	0.00266953	0.0018849	0.00837058	0.00732443	0.00208165	0.0046263	0.00316523	0.00658779	0.00400438
5566			level4			481.236	285.4	POS													0.0008463	5.18431e-05	0.000277408	0.00165432	0.000623824	0.000126093	0.000407168	0.000675404	0.00069419	0.000535637	0.00011492	0.00267959	0.00217031	0.00125053	0.000195345	0.00314798	0.000132878	0.00233764	0.000398997	0.000701682	0.000951104	0.000281654	0.00745674	0.000827711	0.00213391	0.000219857	0.000460905	0.000555352	0.00130817
5586			level4	DG(18:4n3/0:0/22:6n3)	9.71799	661.994	285.3	POS													0.000871987	0.000674205	0.00197136	5.49296e-05	0.00154642	0.00110236	0.000578979	0.00124882	0.00106342	0.001091	0.00104952	0.00112367	0.00178329	0.000715113	0.000500837	0.00114558	0.000223017	0.00165142	0.00102049	0.00256346	0.00109899	0.000816106	0.000552482	0.000398662	0.00295668	0.000407693	0.00125022	0.00191566	0.000983332
5707			level4			622.826	284.2	POS													0.00223891	0.00089242	0.000483565	0.00366953	0.00115767	0.000429461	0.0003661	0.000792884	0.0023297	0.00638881	0.000422305	0.00330416	0.000603219	0.00135958	0.000393605	0.00516496	0.000328616	0.00268463	0.000749806	0.00236883	0.00180644	0.000475186	0.0131536	0.001051	0.0188268	0.000512075	0.000453525	0.00109713	0.000624893
5716			level4			240.924	284	POS													0.0297042	0.0573104	0.0675336	0.0440034	0.00820753	0.0194879	0.0564074	0.0239171	0.0336666	0.0292846	0.0336568	0.05267	0.0627607	0.0577437	0.0378637	0.0364187	0.0289689	0.0324141	0.0308695	0.0377242	0.0390307	0.036157	0.0317015	0.0393082	0.027263	0.0287392	0.0303309	0.0231443	0.0397915
5771			level4			353.92	283.5	POS													0.00559144	0.0030319	0.00876282	0.00720485	0.0015801	0.00327601	0.00481312	0.00498407	0.00512813	0.00267576	0.00467798	0.0140211	0.00648502	0.00520583	0.00451542	0.00344044	0.00212279	0.00397755	0.00324952	0.00307448	0.00489091	0.0036456	0.00286863	0.00339599	0.0021266	0.000986343	0.00308377	0.00230653	0.00410851
5788			level4			338.901	283.3	POS													0.0147344	0.00978695	0.0203875	0.0251365	0.0134685	0.0103511	0.0152874	0.00898136	0.0116386	0.00728466	0.0153558	0.015823	0.00436571	0.0132785	0.0103185	0.0141208	0.00839467	0.011267	0.00705513	0.0171972	0.0127117	0.00787293	0.00750814	0.0119886	0.0142257	0.00679858	0.00465015	0.00718607	0.0137349
5813			level4			403.72	283	POS													0.000637033	0.000820815	7.73968e-06	0.000781603	6.58561e-05	0.000221319	6.10878e-06	0.000255478	0.000209857	0.000325946	5.34279e-05	0.000483053	0.000467113	0.00095602	6.71202e-06	0.00142453	6.03329e-06	9.43796e-05	0.00181716	4.8431e-05	0.000434431	0.000452907	0.000633534	0.000258126	0.00151518	2.90338e-05	6.4469e-06	0.000377026	0.000513259
5825			level4	Indoxacarb	-6.39708	528.838	282.8	POS													0.013577	0.00675859	0.0201751	0.0342916	0.0196251	0.00715029	0.0133875	0.0206838	0.0124139	0.008112	0.0133454	0.0414315	0.0149642	0.014323	0.00837218	0.0129179	0.00630357	0.0137584	0.00831911	0.0168045	0.0153357	0.0185034	0.0170456	0.00973531	0.0160658	0.0030008	0.011256	0.00453395	0.0109299
5848			level4	N-(4-(2-Chlorophenyl)-6,7-dimethyl-3-quinolyl)-N'-(2,4-difluorophenyl)urea	5.99128	438.88	282.5	POS													0.0011618	0.00214377	0.00386999	0.000992408	0.000684708	0.000787868	0.000893858	0.00115629	0.00199739	0.000754526	0.000469286	0.0010457	0.000943078	0.00137559	0.0009167	0.000202169	0.00164912	0.00105101	0.000780899	0.000892345	0.00118843	0.000880641	0.000254022	0.00132911	0.000205085	0.000446308	0.000961135	0.000615146	0.00221016
5858			level4			461.824	282.4	POS													0.000460034	0.000211623	0.00143134	0.000315252	0.000130207	0.00025214	0.000551733	0.00115322	0.000484059	0.000228275	0.000595548	0.000787169	0.000349636	0.00045859	0.000248013	0.000212887	0.000230322	0.000220292	7.86033e-05	0.000717336	0.000455814	0.000429345	0.000150986	0.000829788	0.000129187	7.35466e-05	0.000279974	0.000242021	0.000642245
5862			level4			386.949	282.3	POS													0.000495982	0.00062067	0.00198436	0.000682927	0.000600919	0.000698304	0.000603598	0.000738664	0.000639744	0.00035389	0.000432479	0.000346744	0.000715155	0.000802254	0.000427006	0.000420256	0.000527959	0.000485073	0.000286012	0.000384822	0.000612341	0.000514391	6.24705e-05	0.000708661	0.000335845	0.000142419	0.000649102	0.000350928	0.000539859
5935			level4	PA(12:0/20:4(6Z,8E,10E,14Z)-2OH(5S,12R))	-8.28819	673.839	281.1	POS													0.000494645	0.000151995	4.18688e-05	0.00234659	6.68719e-05	6.23216e-05	9.46933e-05	0.00201931	0.000337336	0.000833498	0.000253409	0.000520539	0.000255582	0.000207407	6.71202e-06	0.000876016	3.0099e-05	0.000786537	5.51572e-05	0.000522837	0.000498171	0.000128619	0.00572661	0.000315608	0.00418969	8.73544e-05	0.000118625	0.000179795	0.000106112
5987			level4	PC(24:0/20:3(5Z,8Z,11Z)-O(14R,15S))	16.7233	911.335	279.9	POS													9.24786e-05	7.35748e-06	8.11597e-05	0.00196727	3.45402e-05	6.35635e-06	5.84678e-05	9.31964e-05	2.77891e-05	6.73331e-06	0.000107177	1.19552e-05	4.33366e-05	7.27281e-06	6.71202e-06	6.9597e-06	2.01222e-05	0.000160936	4.04865e-05	5.78327e-05	0.000141907	7.3684e-06	0.00993798	7.40883e-06	0.00212922	6.4774e-06	9.91031e-05	0.000312584	6.97649e-06
6009			level4			530.926	279.6	POS													0.000465266	7.05861e-05	0.000503702	0.000498534	0.000276417	7.90865e-05	0.000381091	0.000280723	0.000249737	0.000179657	7.69095e-05	0.0016888	0.00089558	0.00102005	0.000219831	0.00114699	9.19239e-05	0.00166902	0.000127868	0.000700203	0.000531099	0.000531999	0.00402462	0.000881157	0.00181673	9.70336e-05	0.000796004	0.000225318	0.00116133
6015			level4	Precis	19.1403	529.923	279.5	POS													0.00513501	0.00100845	0.00384296	0.0110231	0.00355078	0.00145709	0.00366512	0.00345758	0.00319325	0.00218025	0.000781492	0.0149738	0.0059549	0.00862186	0.00295668	0.00926401	0.00144074	0.0118375	0.00200951	0.0045293	0.00504417	0.00462749	0.0311495	0.00649018	0.013301	0.00107889	0.00630124	0.00222	0.00943303
6016			level4			534.855	279.5	POS													0.00200319	0.00157348	0.0044099	0.00738047	0.00252327	0.0013019	0.00209023	0.00274406	0.00182956	0.00139455	0.00138913	0.003101	0.00270921	0.0014521	0.00134344	0.00204312	0.00123166	0.00196119	0.00124091	0.00341185	0.00235671	0.00163991	0.00233747	0.00333924	0.00106419	0.000229697	0.00149132	0.001884	0.00197162
6061			level4	Hexacosanoic acid	-8.00777	397.694	279.1	POS													0.000599729	7.42484e-05	0.000125257	5.49296e-05	0.00027362	2.64592e-05	0.000272165	0.000253711	0.000199586	0.000188953	6.40003e-06	0.00170571	0.000494222	0.000424971	0.000196781	0.000786063	1.80332e-05	0.000974962	0.000575562	0.000369575	0.000381047	0.000300451	0.00289504	0.000301121	0.00145025	2.37316e-05	0.00034317	0.000564969	0.00094053
6067			level4	Light green SF	23.2075	794.882	279.1	POS													0.000286661	6.54449e-05	0.00033756	5.49296e-05	7.42165e-05	4.81964e-05	0.000194887	0.000228471	7.32754e-05	0.000121209	6.40003e-06	0.000858268	0.000393299	0.000731516	0.000261627	0.00035122	0.000144629	0.000860794	6.97416e-05	0.000222344	0.000269234	0.00014135	0.00154113	0.000746749	0.00135506	6.36557e-05	0.000504083	8.38447e-05	0.000791564
6091			level4			585.779	278.8	POS													0.000466349	0.00031002	4.31515e-05	0.000829422	0.000351942	0.000395108	5.28641e-05	0.000302752	6.63944e-06	7.77531e-05	3.20828e-05	0.000341688	2.80825e-05	9.24372e-05	0.000135556	6.9597e-06	6.03329e-06	5.11148e-05	0.00075911	0.000256065	0.000227257	0.000560396	0.00267285	6.0006e-05	0.000744391	0.000188313	0.000319473	0.00210114	0.000404065
6163			level4			612.301	278.3	POS													0.00140247	0.000175111	2.48023e-05	0.00194803	0.000652338	0.000242066	5.80767e-05	0.000322802	0.000409749	0.000277944	9.07552e-05	0.000469795	0.000274018	0.000527395	0.000247945	0.00111452	4.46033e-05	0.00239228	0.00146021	0.00122072	0.000667781	0.000678129	0.00474171	0.000197889	0.000862491	7.83324e-05	0.00039216	0.000956351	0.000768769
6212			level4	S-(PGA1)-glutathione	5.31758	644.8	277.9	POS													0.00373004	0.000755968	0.00134013	0.0042701	0.00152846	0.000969147	0.00362078	0.00166415	0.00100004	0.000874148	0.00215597	0.00405675	0.00128441	0.00315895	0.00254673	0.00333173	0.000679946	0.00171713	0.00091938	0.00410442	0.00218542	0.00108831	0.00511038	0.00393004	0.00926119	0.00076385	0.00157273	0.00203125	0.00231787
6213			level4	PA(10:0/20:4(6Z,8E,10E,14Z)-2OH(5S,12R))	19.1125	645.803	277.9	POS													0.000664325	9.1794e-05	0.000192231	0.000333701	0.000233218	0.00019346	0.000436855	2.56269e-05	0.000158675	0.000171694	6.40003e-06	0.00103646	0.000217759	0.000629354	0.000782985	0.000598347	8.10685e-05	0.000534407	9.72619e-05	0.000794538	0.000364008	0.000226862	0.00157173	0.00118748	0.0026941	6.4774e-06	0.000354068	0.000435021	0.000636035
6238			level4			551.295	277.6	POS													0.000590292	0.000637511	0.000151517	0.00287513	0.000390024	0.000486004	9.36658e-05	0.000272178	0.000473331	0.000935502	0.00020113	0.00035436	0.000315172	0.000492539	0.000302124	0.00124999	4.52235e-05	0.00248084	0.00101297	0.000424245	0.000689187	0.000190697	0.00968003	0.000837886	0.00230561	0.000267995	0.000384878	0.00103037	0.000329236
6268			level4			647.283	277.3	POS													5.53387e-05	3.86611e-05	7.73968e-06	0.000575815	0.000198217	0.000202275	9.36324e-05	0.000142944	0.000101731	2.57462e-05	0.00021267	1.19552e-05	6.74946e-05	7.27281e-06	4.99571e-05	6.9597e-06	5.36639e-05	0.000471483	0.000574675	0.000151927	0.000152508	0.000123633	0.00119304	5.70404e-05	0.000450147	0.000162099	3.04663e-05	0.00148404	0.000217772
6295			level4			646.279	276.8	POS													0.000394095	0.000382184	2.94601e-05	0.00213401	0.000729685	0.000581327	0.00035556	0.000456469	5.73195e-05	0.000220162	0.000125788	0.000522201	0.000412694	0.000492387	0.000188692	0.000321058	2.75395e-05	0.00239547	0.00244843	0.000683956	0.000647924	0.000312726	0.000918168	0.000117451	0.00247682	0.000566969	0.000144973	0.0059072	0.000794352
6463			level4	Fosdevirine	15.7646	414.814	273.5	POS													0.00181454	0.000940497	0.001363	0.00441582	0.00268805	0.000762017	0.00147624	0.00109937	0.000846227	0.000703882	0.000694626	0.00215073	0.00075866	0.000725003	0.00187803	0.000553862	0.000761052	0.00206779	0.000931405	0.00170026	0.00141655	0.00110398	9.32411e-05	0.0011653	0.000381961	0.00081952	0.000780737	0.000523536	0.0010056
6485			level4			272.864	272.9	POS													0.000895186	0.000649409	0.000731939	0.000758495	0.00153768	0.000535088	0.00126281	0.000494512	0.000793369	0.000434781	0.000535035	0.00104592	0.000558558	0.000343631	0.00108945	0.000322905	0.000666207	0.000719562	0.000624239	0.00114321	0.000757099	0.000562336	9.43177e-06	0.000607693	0.000173961	0.000617688	0.00076879	0.000365687	0.000710792
6529			level4			464.728	272.2	POS													0.000148113	7.35748e-06	3.59557e-05	5.49296e-05	0.000534757	4.1974e-05	6.65958e-05	0.000133331	0.000121431	0.000272477	6.77807e-05	0.000143436	0.000253658	0.000156366	6.71202e-06	0.000560616	1.9552e-05	5.31942e-05	0.00020183	0.000365436	0.000162275	4.05228e-05	0.0012115	0.000101042	0.000297844	6.4774e-06	6.4469e-06	0.000612052	6.97649e-06
6537			level4			292.167	272	POS													0.00109563	0.000545564	0.000463795	0.0029295	0.000348755	0.000400625	0.000365969	0.000394403	0.000703641	0.000608729	0.000420414	0.000910498	0.000720062	0.000414331	0.00033934	0.000614981	0.000236552	0.00151474	0.000254166	0.0016372	0.000745945	0.000422694	0.0128114	0.000374738	0.00408324	0.000364307	0.000315998	0.00034267	0.000403668
6550			level4			253.645	271.6	POS													0.000834548	0.00095254	0.000126551	0.000312383	7.33731e-05	0.000438717	3.90532e-05	6.07582e-05	5.5385e-05	0.000200929	2.52634e-05	0.000133892	7.29904e-06	0.000523569	2.66984e-05	0.00129606	2.03732e-05	6.81434e-06	0.000654172	0.000283966	0.000303617	0.000180414	0.00367758	0.000337693	0.00167869	0.000203715	0.000491358	0.00065771	0.000149834
6668			level4			279.699	270.1	POS													0.00133528	7.35748e-06	0.000249889	5.49296e-05	0.00011856	6.35635e-06	0.000130798	0.000202005	0.000381776	6.73331e-06	6.40003e-06	0.00167252	0.00050629	0.00103296	0.000435396	0.00181596	6.03329e-06	0.00229745	0.000131256	7.01008e-06	0.000520248	8.79748e-05	0.00283717	0.000369846	0.00232138	6.4774e-06	0.000200075	2.71267e-05	0.00105786
6793			level4			585.27	268.6	POS													0.000390599	3.36736e-05	7.73968e-06	0.000983969	0.000468192	3.13865e-05	7.24089e-05	0.000160317	0.000150081	0.000189636	2.41659e-05	0.000651703	0.000225261	0.000142736	2.8715e-05	0.000427823	6.03329e-06	0.000377285	6.85074e-05	0.000798048	0.000261914	3.8839e-05	0.00157563	0.000225506	0.00424947	6.4774e-06	6.4469e-06	0.000482006	0.000104554
6807			level4			647.32	268.5	POS													0.00134774	0.000553731	0.000583937	0.00518965	0.00272127	0.000766888	0.000720428	0.0025605	0.00133147	0.000500747	0.000505918	0.00354786	0.00136613	0.000703305	0.000320439	0.00100114	8.22433e-05	0.00475145	0.000730136	0.00466595	0.00169755	0.00367028	0.0173591	0.000235344	0.00834387	0.000228205	0.00249368	0.00405131	0.000606502
6827			level4			658.309	268.4	POS													0.000408941	0.000120803	0.000151629	0.00165651	0.000143819	0.00013473	6.84569e-05	0.000379601	0.000258259	4.12243e-05	0.000108256	0.000212388	0.000311204	0.000202266	4.39193e-05	0.000460541	6.03329e-06	0.000838437	6.99202e-06	0.000655354	0.000310468	0.000845927	0.00327081	8.13354e-05	0.000854348	4.34957e-05	0.000674548	0.00139775	0.000307674
6872			level4	Fetidine	23.9065	683.825	268.1	POS													0.000148897	7.35748e-06	7.73968e-06	0.00269078	0.000457905	0.000172678	3.94047e-05	0.000487003	0.000200621	0.000253377	8.95431e-05	0.000810423	6.03673e-05	7.27281e-06	6.71202e-06	6.9597e-06	6.03329e-06	0.00108321	6.99202e-06	0.00110431	0.000382379	3.8108e-05	0.00782388	7.40883e-06	0.00242085	6.4774e-06	6.4469e-06	0.00115748	6.97649e-06
6928			level4	Argiotoxin 636	10.4013	637.801	267.5	POS													0.000862783	7.28943e-05	0.000126846	0.000492122	0.000382376	0.000101077	8.59443e-05	0.000243028	0.000199454	0.000179876	9.47101e-05	0.00151286	0.000484205	0.000626128	0.000368327	0.00100966	3.15631e-05	0.000414107	0.000226526	0.000418424	0.000396646	0.000227855	0.00189694	0.000228481	0.000957628	5.24781e-05	2.76383e-05	0.000117407	0.000192643
6949			level4	Tiamulin	3.89556	494.751	267.2	POS													0.000797717	0.000277149	0.000154627	0.0016402	0.00258451	0.000187401	0.000211963	0.000287502	0.000664418	4.92403e-05	8.56219e-05	0.0018399	0.000340476	0.000572561	0.000179322	0.000468341	6.36014e-05	0.00120706	0.00067773	0.000938142	0.000661374	0.00225254	0.000960295	0.000158183	0.00111646	0.000400771	0.00070832	0.000992082	0.000675309
6970			level4			793.35	267.1	POS													0.000400103	3.18065e-05	7.46507e-05	0.000408897	8.9006e-05	4.2687e-05	0.000123163	0.000298656	6.63944e-06	6.87063e-05	6.40003e-06	0.000380975	7.29904e-06	0.000245453	8.01105e-05	0.000745309	7.12402e-05	0.000785673	6.99202e-06	0.000123892	0.000199883	7.3684e-06	0.00137175	9.15134e-05	0.00152348	8.35906e-05	0.000281438	5.70184e-05	0.000200786
6996			level4			792.849	267	POS													0.000491126	7.35748e-06	0.000106201	5.49296e-05	7.9584e-05	6.35635e-06	6.10878e-06	9.84391e-05	6.63944e-06	6.73331e-06	6.40003e-06	0.000615088	5.21437e-05	0.000459972	4.81905e-05	0.000760489	0.00011993	0.000792086	6.99202e-06	0.000285715	0.000200524	7.3684e-06	0.00181629	0.000153229	0.00194115	6.4774e-06	0.000228915	5.93157e-06	0.000442786
7072			level4			659.313	266.3	POS													0.000229978	0.000338874	0.000385263	0.000554973	0.00024379	0.000211745	6.10878e-06	6.1489e-05	0.000383909	0.000112862	0.000214777	0.00100227	0.000248059	0.000720302	2.95093e-05	0.00031989	6.03329e-06	0.00162673	7.41972e-05	0.000822933	0.000379684	0.000474505	0.0019359	0.000253754	0.000984422	6.4774e-06	0.000592132	0.00176293	0.000236639
7099			level4	Iron(III) diphosphate (Fe4(P2O7)3)	20.4283	746.232	265.9	POS													0.000737533	7.35748e-06	3.67679e-05	0.000476484	6.6035e-06	6.35635e-06	3.52555e-05	0.000368412	6.63944e-06	7.88306e-05	6.40003e-06	1.19552e-05	7.29904e-06	7.27281e-06	6.71202e-06	0.00195054	6.03329e-06	7.75293e-05	2.61834e-05	0.000324763	0.000209246	0.000144983	0.0140992	7.40883e-06	0.0036424	6.4774e-06	5.6427e-05	0.00151454	6.97649e-06
7187			level4			795.375	263.3	POS													0.00208379	6.25252e-05	6.74915e-05	0.000960862	0.000163428	2.97264e-05	0.00044899	0.000616726	0.000211579	0.000509743	3.969e-05	0.00296646	0.000873566	0.00128791	0.000534002	0.00257734	2.01074e-05	0.00113568	3.68937e-05	0.00238655	0.000850653	7.3684e-06	0.0310037	0.00115657	0.0109162	6.4774e-06	0.000100599	0.000591554	0.000917794
7204			level4	4-Amino-N-(3-chloro-4-fluorophenyl)-N'-hydroxy-1,2,5-oxadiazole-3-carboximidamide	-0.650125	272.647	262.6	POS													0.00361832	0.001285	0.000236384	0.00223182	7.47118e-05	0.000691492	0.000535387	0.000939305	0.00069934	0.00162825	0.000317045	0.00173909	2.20928e-05	0.000970201	6.71202e-06	0.00380893	6.03329e-06	0.00054555	0.000776949	0.00507319	0.00126029	2.4744e-05	0.020074	0.000315514	0.0038581	0.000397134	0.000225435	0.00137401	7.75217e-05
7206			level4			433.204	262.6	POS													0.000890084	0.000301293	0.000532888	0.00779105	0.000350491	0.000351076	0.000155465	0.000433816	0.00113876	0.000770155	0.000948402	0.00134783	0.00189478	0.000617322	0.000123736	0.0032941	0.000119811	0.00245586	0.000499825	0.000591304	0.0012304	0.000319993	0.0107336	0.000419507	0.00110413	9.06462e-05	0.000981353	0.00117993	0.000284698
7264			level4			468.215	261.3	POS													0.000395799	8.74945e-05	2.81262e-05	5.49296e-05	0.000538971	7.27077e-05	0.000126178	0.000410673	0.000608715	0.000290595	6.59645e-05	0.000268312	0.000352598	0.000139747	9.2625e-05	0.00043008	6.03329e-06	0.000554897	0.000361727	0.000431376	0.000265878	0.000174257	0.00263306	2.91011e-05	0.000768393	9.68345e-05	7.21521e-05	0.000680016	0.000214702
7332			level4			705.364	259.8	POS													0.000175689	7.35748e-06	7.73968e-06	5.49296e-05	4.42686e-05	6.35635e-06	6.10878e-06	7.65125e-06	6.63944e-06	6.73331e-06	6.40003e-06	0.000446668	7.29904e-06	4.5583e-05	0.000182233	0.000763003	6.03329e-06	0.000532468	6.99202e-06	7.01008e-06	0.000116358	7.3684e-06	0.000794025	0.000155342	0.000415419	6.4774e-06	6.33303e-05	3.47312e-05	0.000206829
7350			level4			244.917	259.5	POS													0.000251054	0.000332652	0.000180318	5.49296e-05	0.000142645	0.000235886	0.000204506	0.000318522	0.000302672	0.000536526	0.000732467	0.00107049	0.000404622	0.000239333	0.000387364	0.00132108	0.000347981	0.000665961	0.000235669	0.0002244	0.000409454	0.000289393	0.000831893	0.000838134	0.00067846	0.00131436	0.000287226	0.00106482	0.000467796
7376			level4			422.227	258.8	POS													0.00135452	0.000379806	9.9667e-05	0.000708733	0.000648954	0.000349151	0.00017425	0.000919101	6.32918e-05	0.000333026	3.20196e-05	0.00242749	0.000159182	0.000523296	7.10228e-05	0.00286728	6.03329e-06	0.000457831	0.00110009	0.000710261	0.000669251	0.000478316	0.00422792	7.40883e-06	0.00364022	0.000114743	0.000436075	0.00207121	0.000507028
7427			level4			661.315	257.6	POS													0.00212821	0.000143967	0.000654983	0.000577984	0.00129478	0.000104264	0.000557099	0.00174623	0.000349653	0.000958374	0.000237498	0.012661	0.00252823	0.00214783	0.00130194	0.0196402	0.000546645	0.0083598	0.000564382	0.00288501	0.0029694	0.00110176	0.0514538	0.00114447	0.0124309	0.000386934	0.00134736	0.000238092	0.00236474
7431			level4			662.318	257.5	POS													0.000872829	7.35748e-06	0.000185714	5.49296e-05	0.000422052	6.35635e-06	0.000121335	0.000590309	8.9762e-05	0.000256056	6.40003e-06	0.00376688	0.000790563	0.000710084	0.000477936	0.00613035	0.000168835	0.00252024	0.000218592	0.000843579	0.000912008	0.000323591	0.0162248	0.000355467	0.00381632	0.000129991	0.000331787	5.93157e-06	0.000516866
7434			level4			584.297	257.4	POS													0.000385483	0.000387969	7.73968e-06	0.0038224	0.000344497	0.000298897	0.000132403	0.000131403	0.000103967	0.000199835	5.15787e-05	0.0016299	0.000467219	0.000278899	8.48651e-05	0.000268358	6.03329e-06	0.000286312	0.000528571	0.000307611	0.000486197	0.000622056	0.00627164	0.000140364	0.00187486	2.8709e-05	0.000322405	0.000972586	0.000216981
7440			level4			663.321	257.2	POS													0.000341693	3.16892e-05	7.73968e-06	5.49296e-05	6.6035e-06	6.35635e-06	6.10878e-06	0.000115385	6.63944e-06	4.37824e-05	6.40003e-06	0.000906957	7.35813e-05	6.56644e-05	0.000114856	0.000985712	2.1993e-05	0.000538321	6.99202e-06	0.000179499	0.000176045	6.64403e-05	0.00336788	5.64606e-05	0.000831923	6.4774e-06	6.4469e-06	5.93157e-06	0.000131066
7564			level4			101.808	254.5	POS													0.000440386	0.000106205	7.73968e-06	5.49296e-05	6.6035e-06	4.84275e-05	6.10878e-06	2.26316e-05	0.000309667	0.000419844	0.000126732	0.000199561	7.29904e-06	6.10973e-05	1.72924e-05	0.000510998	1.3215e-05	0.000119369	1.80572e-05	0.000247997	0.000137208	7.3684e-06	0.00198097	0.000148633	0.000395376	6.4774e-06	0.000197836	0.000204982	6.97649e-06
7587			level4			571.284	254.5	POS													0.000338191	7.35748e-06	7.73968e-06	5.49296e-05	0.000183357	6.35635e-06	2.96537e-05	7.65125e-06	6.63944e-06	0.000145739	6.40003e-06	1.19552e-05	0.000274944	4.45971e-05	6.71202e-06	0.000280894	6.03329e-06	0.000375055	6.99202e-06	0.000454644	0.000112792	4.05571e-05	0.00127459	7.40883e-06	0.00066001	6.4774e-06	6.4469e-06	5.93157e-06	6.97649e-06
7610			level4			698.848	254	POS													0.000175192	7.35748e-06	3.70519e-05	5.49296e-05	6.6035e-06	6.35635e-06	3.30648e-05	3.94398e-05	6.63944e-06	6.73331e-06	6.40003e-06	0.000336233	7.29904e-06	4.57794e-05	0.000237601	0.000281234	6.03329e-06	0.00022948	6.99202e-06	0.000208221	8.69321e-05	0.000110252	0.000342971	3.74392e-05	0.000490521	6.4774e-06	2.92712e-05	3.35706e-05	0.000115373
7718			level4			610.8	250.4	POS													0.00207648	0.000654199	0.000196008	0.00174806	0.00251184	0.000218732	0.000245829	0.000457473	0.0011011	0.00016635	0.000159924	0.00192339	0.000669786	0.00142084	0.000196412	0.00112685	2.48206e-05	0.00325428	0.0024529	0.00187365	0.00112395	0.00296821	0.00553211	0.000246895	0.00157892	0.000188239	0.0010864	0.00238461	0.00182301
7896			level4			606.308	247	POS													0.000147156	2.75601e-05	7.73968e-06	5.49296e-05	0.000202728	2.76188e-05	4.55295e-05	0.0001158	0.00014721	6.18779e-05	6.40003e-06	1.19552e-05	8.08692e-05	0.000137117	6.66242e-05	0.000991806	6.03329e-06	0.000306439	2.96564e-05	0.000165039	0.000132004	0.000167853	0.000710156	0.000121226	0.000708149	6.4774e-06	0.000103436	0.000251604	0.000224472
7901			level4	Papyriferic acid	-24.597	605.807	246.8	POS													0.000239302	0.000196374	3.96599e-05	5.49296e-05	0.000194249	8.11161e-05	0.000101282	7.65125e-06	8.47162e-05	0.000134226	6.40003e-06	0.000181281	3.16388e-05	0.000443591	3.38062e-05	0.00106708	4.03189e-05	0.000330396	8.46605e-05	0.000307228	0.000182995	0.000224913	0.000505733	0.000171971	0.00150073	6.4774e-06	0.000139948	0.000165101	0.000348355
7930			level4			638.338	246	POS													0.000689377	7.35748e-06	7.73968e-06	5.49296e-05	0.00015128	2.98709e-05	0.00013606	0.00028995	6.63944e-06	0.000274666	6.40003e-06	0.00079822	0.000124724	0.00084855	0.000339117	0.00212441	6.03329e-06	0.00271619	0.000168428	0.00123641	0.000500817	7.3684e-06	0.00486531	0.000603469	0.00126312	2.54078e-05	3.16046e-05	2.31872e-05	0.00139604
7951			level4	Avenestergenin A1	-20.8147	638.84	245.5	POS													0.000362968	7.35748e-06	7.73968e-06	5.49296e-05	0.000104682	6.35635e-06	2.92813e-05	0.000176908	6.63944e-06	0.000265497	6.40003e-06	0.000512621	7.29904e-06	0.000496611	0.000336423	0.00150033	2.18006e-05	0.0013477	6.54864e-05	0.000548688	0.000293286	7.3684e-06	0.00160364	0.000401994	0.000725826	6.4774e-06	6.4469e-06	5.93157e-06	0.000962725
7977			level4			355.17	244.8	POS													0.000229658	0.000220008	3.48737e-05	0.000611299	0.000118258	6.35635e-06	0.000287421	0.000662232	0.00104774	0.000324364	0.000126368	0.000154236	0.00089926	0.000173574	3.77676e-05	0.000112716	5.25525e-05	0.000280101	0.000277019	4.72319e-05	0.000285152	0.000120702	0.00429032	6.59498e-05	0.00138348	0.000438237	3.62576e-05	0.00170568	6.97649e-06
8057			level4			318.864	242.8	POS													0.00164502	0.000868822	0.000976682	0.0023029	0.00130101	0.000976423	0.000950051	0.000848975	0.00105575	0.00114904	0.000820233	0.0019003	0.000905821	0.000714239	0.00115707	0.00145468	0.000979767	0.000847847	0.000758072	0.00162058	0.00116166	0.00096076	0.000520184	0.00178163	0.000542027	0.00119817	0.000920849	0.00045024	0.000813804
8071			level4			292.872	242.5	POS													0.000521424	0.000536601	0.000801877	5.49296e-05	0.000622556	0.000813769	0.000819984	0.000767629	0.000836016	0.000402433	0.000696089	0.000950356	0.000803222	0.00074804	0.00075695	0.000250514	0.000862121	0.000504493	0.000628553	0.000466424	0.000642199	0.000642561	0.000771955	0.000823247	0.000947081	0.00134574	0.000889058	0.000657825	0.00052707
8123			level4			236.861	242	POS													0.00216627	0.00265411	0.00296186	0.00235243	0.00277086	0.00142064	0.00210858	0.00212123	0.00369667	0.00188798	0.0031512	0.00556435	0.00248073	0.00220333	0.00243195	0.0011279	0.00210413	0.00233398	0.00226912	0.00233914	0.00250732	0.00221872	0.00167417	0.00285622	0.00151304	0.000809847	0.00280511	0.000812788	0.00137263
8156			level4			198.866	241.5	POS													0.00215333	0.00149386	0.00256809	0.00132185	0.00156472	0.000463605	0.0018876	0.00162556	0.00166963	0.000744456	0.00171499	0.00296082	0.00157634	0.00171129	0.00126093	0.000238277	0.00117949	0.00136296	0.0010177	0.00219316	0.00153543	0.00179217	0.000687527	0.00131455	0.000794842	0.00041708	0.00179149	0.000446175	0.000552343
8160			level4			182.892	241.4	POS													0.00125224	0.00125262	0.00151581	0.00248279	0.00136774	0.00118514	0.00113482	0.00120012	0.0013659	0.00151341	0.00127002	0.00307425	0.00173524	0.00120257	0.00149946	0.00126013	0.00137336	0.00136322	0.00158042	0.00131001	0.00149696	0.00136141	0.000574928	0.00166759	0.00104608	0.00102328	0.001579	0.000891591	0.00132634
8189			level4			338.799	240.3	POS													0.00283016	0.00231789	0.00281158	0.00263691	0.00213459	0.000931612	0.0022048	0.00255299	0.00275793	0.00203843	0.00232294	0.0055862	0.00260438	0.00200986	0.0021575	0.0014402	0.00233672	0.0020784	0.00214849	0.00257506	0.00242383	0.00230806	0.00221129	0.00262079	0.00157473	0.000711144	0.00280094	0.00108517	0.0015584
8198			level4			316.817	240.2	POS													0.00414831	0.00329551	0.00582067	0.00685318	0.00372539	0.00116519	0.00406315	0.00356353	0.00392296	0.00248279	0.00373697	0.00868044	0.00406435	0.00366384	0.00367657	0.00138149	0.00332733	0.00433542	0.00330316	0.00439079	0.00398005	0.00423658	0.0034058	0.00369596	0.00279454	0.00109936	0.0048552	0.00179248	0.00187297
8254			level4			438.764	239.4	POS													0.000577193	0.000413052	0.000660897	5.49296e-05	0.000317136	0.000152626	0.000409149	0.000461111	0.000457582	0.000278619	0.000364268	0.000961648	0.000508542	0.000210942	0.000458779	0.00013188	0.000515278	0.00039829	0.000336262	0.000388261	0.000402822	0.000401917	0.00010811	0.000513848	0.000166811	0.000211283	0.000388566	0.000169776	0.000250834
8459			level4			769.677	238.8	POS													0.000574027	0.000301864	0.000286157	0.000674633	0.000236298	0.000111817	0.000221995	0.000410529	0.00026186	0.000324561	0.000256269	0.000855034	0.000312052	0.000233653	0.000294015	0.000203229	0.000364248	0.000262938	0.000349812	0.000216052	0.000337552	0.000163427	9.43177e-06	0.000361586	9.61732e-05	3.99795e-05	0.00021715	0.000165405	0.000225123
8508			level4	4,11-Dichloro-5,12-dihydroquino[2,3-b]acridine-7,14-dione	-6.49665	382.217	236.4	POS													0.00131286	0.00118922	0.00232254	0.000970699	8.89607e-05	0.000709126	0.000149932	0.000185759	0.0005215	0.00247454	0.000164806	0.000586663	0.000975601	0.000449584	0.000175531	0.000670573	0.000145764	0.000358892	0.000197196	0.00206276	0.000785625	9.69777e-05	0.020406	0.000270629	0.00529891	0.000111227	0.000205934	0.0013775	7.75657e-05
8600			level4			274.826	234.1	POS													0.000439745	0.000205738	0.00187287	5.49296e-05	0.00125012	6.35635e-06	0.00131738	0.000425531	0.000745066	9.73335e-05	0.000555616	0.00120775	0.000517108	0.000787967	0.000475373	6.9597e-06	0.000393457	0.001031	0.000343144	0.00102893	0.000638119	0.00089981	9.43177e-06	0.000243045	0.000233589	6.4774e-06	0.00100608	2.4502e-05	2.13537e-05
8692			level4			257.975	231.9	POS													0.000842933	0.000272185	0.000748471	5.49296e-05	0.00043113	0.000201643	0.000129389	0.000234796	0.000392223	0.000250438	0.000149453	0.00055847	0.00152563	0.000608161	0.00013742	0.000671507	0.000368478	0.00161076	0.000484657	0.000358076	0.000501538	0.000882491	0.00363141	0.000463603	0.00303221	0.000621424	0.00060131	0.000292493	0.000527847
8727			level4			473.188	230.4	POS													0.000647995	0.000134387	0.000125251	5.49296e-05	8.64955e-05	0.000141103	0.00077503	0.000190562	0.000313593	0.000108706	0.000104143	0.00144488	0.000174796	0.000542679	3.64881e-05	0.000620034	0.00031221	0.000475318	0.000326422	0.000218125	0.000341657	0.00149296	0.00162673	0.000154047	0.00041257	6.4774e-06	0.000486972	0.000333705	4.25696e-05
8742			level4	Erucylphosphocholine	4.13173	490.731	229.4	POS													0.000550661	0.000102835	2.8507e-05	5.49296e-05	0.000258695	0.000103468	2.63109e-05	0.00037441	0.000120861	0.000305621	3.65721e-05	1.19552e-05	0.000403637	0.000382838	6.71202e-06	0.000131504	6.03329e-06	0.000172576	7.57114e-05	0.000282842	0.000171834	7.0485e-05	0.00161046	3.60159e-05	0.000566882	6.4774e-06	0.000168184	0.000476858	6.97649e-06
8786			level4			249.009	227.3	POS													0.000248892	0.000210347	0.000270314	5.49296e-05	0.000273751	0.000183099	0.000184039	0.000340894	0.000287433	0.000203899	0.000195466	0.000488151	0.00030246	0.000335405	0.000305041	0.000244011	0.00030251	0.000246675	0.000279609	0.00014238	0.000254965	0.000312655	0.000389958	0.000383632	0.000301862	0.000554922	0.000193884	0.000277634	0.000368549
8815			level4			439.935	226.5	POS													0.000432306	0.000319531	0.000814893	5.49296e-05	0.00102902	0.000196146	0.000908415	0.000537616	0.000918331	0.000176426	0.000504563	0.00164746	0.000794095	0.000708217	0.000774679	6.9597e-06	0.000938051	0.00103535	0.000909599	0.000320294	0.000651344	0.000339694	0.000297635	0.00102137	0.000403321	0.000160656	0.00100056	0.000213185	0.000286354
8842			level4	Clofilium	-20.5813	339.978	226.2	POS													0.003535	0.00173304	0.00171271	5.49296e-05	0.00418985	0.0027933	0.00255317	0.00401387	0.00239898	0.00145961	0.00211377	0.00266046	0.00193094	0.00187188	0.00388075	0.00179986	0.00244003	0.00285071	0.00296946	0.00349659	0.00252295	0.00207565	0.00249239	0.00198966	0.00297294	0.00949908	0.00136337	0.00471452	0.00355126
8880			level4			342.016	225.7	POS													0.00154031	0.000813252	0.000296485	5.49296e-05	0.00123391	0.00348775	0.000632928	0.00199022	0.00114814	0.00145914	0.00107215	0.00281027	0.00150105	0.000847445	0.00245121	0.00272969	0.00237497	0.000892367	0.0022193	0.00690356	0.00182295	0.000458605	0.00980991	0.00235944	0.00140553	0.00181605	0.00913372	0.00182824	0.004192
8908			level4	TETRANITROMETHANE	-19.2653	197.035	225.6	POS													0.00218416	0.00110995	0.00114815	5.49296e-05	0.00169244	0.0018044	0.00141793	0.00216666	0.00167031	0.00126321	0.00115517	0.00257462	0.00152006	0.00156114	0.00167876	0.00172954	0.00157461	0.00136305	0.0014483	0.00156216	0.00153398	0.00147266	0.00203494	0.00155761	0.00166566	0.00323044	0.00110635	0.00200233	0.00169026
8993			level4			416.048	225.4	POS													0.000294715	4.24108e-05	7.73968e-06	5.49296e-05	0.000299312	0.00042816	6.62067e-05	0.000328322	0.000377996	0.000139049	0.000129078	0.000324227	0.000250455	0.000188547	0.000510087	7.75363e-05	0.000465552	0.000180551	0.000213358	7.01008e-06	0.000219262	0.000103849	0.000358192	0.000446707	0.000258736	0.000497744	9.60778e-05	0.000336595	0.00045957
9084			level4			422.106	222.8	POS													0.00282906	0.00772375	0.00442111	0.00607605	0.00211616	0.000110406	0.00078822	0.00108524	0.000167689	0.00625328	0.000131661	0.000250425	0.000318723	0.00457696	2.63701e-05	0.00558101	6.03329e-06	0.00165127	0.000189742	0.00646034	0.00253817	0.0098813	0.0254323	8.04771e-05	0.00392737	0.000345218	0.00114319	0.00128983	7.77183e-05
9160			level4			501.228	222.6	POS													0.00261967	0.00018705	0.00164182	5.49296e-05	0.000261889	6.35635e-06	0.000757839	0.00147215	6.63944e-06	6.73331e-06	6.40003e-06	0.000134339	8.52674e-05	0.00198791	0.000151159	0.00646799	6.03329e-06	0.000267278	6.99202e-06	0.00318026	0.000965436	0.00214057	0.0172757	7.40883e-06	0.0022083	0.000384087	0.000297066	0.00187842	0.000177878
9180			level4			680.337	222.6	POS													0.000428527	0.00160802	0.000494984	0.00370876	0.000155943	0.000850607	0.000155563	0.000206043	0.000469723	0.00190411	0.000148958	0.000685471	8.06747e-05	0.00114608	7.23082e-05	0.00265366	6.03329e-06	0.00011529	0.000294854	0.00184211	0.000851386	0.00024444	0.00756811	0.000566602	0.00634761	6.4774e-06	0.000461063	0.00241242	0.000139502
9194			level4	Clopyralid	6.89273	193.008	222.2	POS													0.000488859	7.71271e-05	5.07553e-05	5.49296e-05	6.3861e-05	5.77299e-05	2.61868e-05	0.000206263	0.000547941	0.00022252	0.000118353	0.00123236	0.000500477	0.000308096	5.42699e-05	0.000957142	5.0066e-05	0.000353337	0.000211426	0.000218473	0.000290009	8.63363e-05	0.000154138	9.31846e-05	0.00134627	0.000110079	0.000105234	0.000557681	0.000409589
9304			level4	Iprodione	-5.38092	331.172	219.9	POS													5.7352e-05	9.49529e-05	7.73968e-06	5.49296e-05	6.6035e-06	5.60328e-05	7.8688e-05	0.000342277	0.000174288	0.000112473	6.40003e-06	8.80191e-05	7.29904e-06	0.000255809	6.71202e-06	0.000502015	4.04353e-05	0.00011895	5.90693e-05	3.06629e-05	0.000105035	7.3684e-06	9.43177e-06	7.40883e-06	0.000571481	0.000222904	2.02401e-05	0.000616346	6.97649e-06
9314			level4			379.209	219.7	POS													0.000492389	0.000321602	7.73968e-06	0.00180423	6.6035e-06	6.35635e-06	5.30267e-05	9.64955e-05	0.000272089	0.000280535	6.40003e-06	0.000914613	0.00134506	0.000248027	0.00012392	0.000149285	6.03329e-06	0.000727798	0.000129182	7.01008e-06	0.00034992	0.000225175	0.000965478	0.000441962	0.000591735	6.4774e-06	0.00024462	0.000149999	0.000259501
9411			level4			309.95	217.5	POS													8.04405e-06	0.000678947	0.000185617	5.49296e-05	0.000109444	0.00126766	0.000236621	0.000351916	0.00041363	0.000456803	0.000157176	0.000363693	0.000102105	6.64247e-05	3.03262e-05	0.00063012	5.02973e-05	0.000172058	0.000144307	0.000233362	0.000285674	0.000488801	0.00196325	0.00122314	0.000330965	0.000602864	0.000292229	0.000533442	7.51808e-05
9468			level4			190.008	217.2	POS													0.00038201	0.000186726	0.000121087	5.49296e-05	0.000326095	0.000307308	0.000185051	0.000291829	0.000259314	0.000321697	0.000386238	0.00039168	0.000253116	0.000387075	0.000363999	0.000460108	0.000332422	0.000221393	0.000294569	0.000305398	0.000291602	0.000306386	0.000369164	0.00023303	0.000356625	0.000555047	0.00015408	0.000330606	0.000590846
9698			level4			296.029	213.6	POS													0.000347915	0.000532041	0.000107451	5.49296e-05	0.000265919	0.000163302	0.000214602	0.000263948	0.000421132	0.000248395	0.000176714	0.000209367	0.000360242	0.000629074	0.000297242	0.000743382	7.38845e-05	0.000329668	0.000268803	0.000511578	0.000310979	0.000325361	0.00112423	0.0001426	0.000404345	0.000685293	0.000271614	0.000264061	0.000213334
9702			level4	1,2,3,4,7,8-Hexachlorodibenzofuran	-19.945	375.861	213.6	POS													0.00181521	0.00113137	0.00152012	0.00529958	0.00355196	0.0010882	0.00235778	0.00312681	0.00271716	0.000870756	0.00204271	0.00178665	0.00145291	0.00259062	0.00174903	0.000328858	0.00536271	0.00229276	0.00155115	0.00151781	0.00220771	0.00263333	0.0017816	0.000954309	0.00108842	0.00171108	0.00132633	0.000819251	0.000674605
9723			level4			425.86	212.8	POS													0.00165314	0.00156276	0.000270342	5.49296e-05	0.00112887	0.000776788	0.00108389	0.0023814	0.00143083	0.00106322	0.00109273	0.000234697	0.00153863	0.0011663	0.00133493	0.00098209	0.00164899	0.000681065	0.00116651	0.00084084	0.00110465	0.000731367	0.000806339	0.00143377	0.00147468	0.00421877	0.00106161	0.00322205	0.00475262
9734			level4	3,5-Dibromo-4-hydroxybenzamide	-6.36291	295.933	212.4	POS													0.00122293	0.000915236	0.000378626	5.49296e-05	0.000331374	0.000401303	0.000684372	0.000731607	0.000809655	0.000976453	0.000915687	0.00113802	0.000970679	0.000708234	0.00103786	0.000303237	0.00106085	0.000694684	0.000670183	0.000635644	0.000732078	0.000881687	0.00185302	0.000707824	0.00122521	0.00295178	0.000783283	0.00101948	0.000660251
9750			level4			256.016	212.2	POS													0.000630065	9.26077e-05	0.000216771	5.49296e-05	0.000382892	0.000213118	5.92883e-05	0.000814053	5.21855e-05	0.000353696	6.40003e-06	0.000131376	0.000163328	0.000269202	5.95427e-05	0.000699788	6.03329e-06	0.000301615	4.59353e-05	0.000524422	0.000253863	0.000203849	0.00213729	8.52436e-05	0.000514203	5.39226e-05	0.000161244	0.000320518	0.000218425
9755			level4			311.116	212.1	POS													0.00290785	0.00091366	0.00432998	5.49296e-05	0.00271919	0.00134267	0.000640261	0.00421437	0.000524065	0.00124105	0.00024527	0.00112391	0.0012496	0.00431687	0.000849266	0.00404433	0.000240924	0.00288969	0.00110672	0.00423557	0.00195951	0.00286259	0.00691285	0.00126017	0.00258114	0.000139337	0.00201053	0.000952929	0.00149063
9756			level4			338.02	212.1	POS													0.000288057	7.35748e-06	0.000116146	5.49296e-05	0.000352919	0.00017673	6.10878e-06	0.000591932	6.63944e-06	3.43139e-05	6.40003e-06	1.19552e-05	7.29904e-06	0.000303285	0.000102622	0.000583966	6.03329e-06	0.000281091	6.99202e-06	0.000375582	0.000166018	0.000150905	0.00143213	6.50004e-05	0.00014918	6.4774e-06	0.000112529	0.000166935	6.97649e-06
9762			level4			310.113	212	POS													0.030374	0.00910411	0.0330182	0.0369994	0.0269358	0.0172082	0.007779	0.0365281	0.00653767	0.00880098	0.003637	0.0138678	0.0131609	0.0407191	0.00978415	0.0344687	0.00379467	0.0274279	0.012542	0.0403747	0.0206531	0.025792	0.0691976	0.0110476	0.0225421	0.00540126	0.0171698	0.0148246	0.0152579
9770			level4			482.023	211.8	POS													0.000832248	0.000137553	0.000170181	5.49296e-05	0.000662788	0.000665246	8.12545e-05	0.00138403	3.98779e-05	0.00023405	2.87907e-05	0.000223243	0.000372221	0.000630147	9.3733e-05	0.0017221	2.57876e-05	0.000424258	9.26861e-05	0.000665559	0.000427034	0.00036621	0.00246449	0.000256955	0.00108779	6.67172e-05	0.000287897	0.000556684	0.000594147
9780			level4			460.041	211.7	POS													0.00253115	0.000681065	0.000810256	0.000885276	0.00194521	0.00230356	0.000343926	0.0035031	0.000243337	0.00144667	3.16505e-05	0.00100413	0.00125124	0.00216065	0.000656166	0.00537667	0.000179343	0.0016364	0.000832387	0.00212919	0.00149757	0.00142583	0.0076554	0.000794761	0.00243109	0.00046357	0.00105559	0.00123573	0.00174782
9789			level4			438.059	211.6	POS													0.00100024	0.000190582	0.000438489	5.49296e-05	0.00119861	0.00151584	0.000135017	0.00176888	6.83114e-05	0.000650068	6.40003e-06	0.000825266	0.000466293	0.00116036	0.000482174	0.00288213	6.03329e-06	0.000896521	5.41266e-05	0.00121179	0.000750603	0.000666321	0.00439611	0.000421462	0.00102013	5.92747e-05	0.000669036	0.000586547	0.00101696
9792			level4			544.023	211.6	POS													0.000968592	0.000186426	0.000257248	5.49296e-05	0.000747443	0.00117337	9.74429e-05	0.00177898	0.000109589	0.00041227	6.40003e-06	0.000329688	0.000252383	0.000727573	0.000268685	0.00215909	6.03329e-06	0.000659376	0.000212248	0.000811802	0.000560978	0.000481697	0.00298276	0.000183746	0.000947838	0.000137385	0.00032631	0.000600488	0.000815171
9808			level4	DMS-Cl	9.862	398.841	211.1	POS													0.00128484	0.00144823	0.00112914	5.49296e-05	0.0025679	0.00197212	0.00139597	0.00323299	0.00180969	0.00255	0.00164449	0.00144616	0.00284742	0.00165038	0.00294537	0.00215775	0.00359037	0.00145224	0.00154914	0.00134871	0.00190389	0.00131567	0.00282349	0.00182526	0.00260702	0.0039022	0.00158851	0.00377332	0.00491546
9862			level4			189.97	210	POS													0.000669655	0.00100317	0.000425368	0.000924734	0.00092691	0.000922689	0.000888814	0.00130292	0.000582928	0.00137885	0.000706945	0.00142182	0.000581947	0.000902789	0.000971219	0.0017625	0.00120552	0.000531687	0.00104117	0.000666541	0.000940909	0.000567836	0.00159221	0.00115708	0.00102835	0.000700661	0.000658346	0.00106935	0.00193229
9889			level4			286.942	209.7	POS													0.0029043	0.00400513	0.00171241	0.00501839	0.00268408	0.00420077	0.00218959	0.00291591	0.00327684	0.00379683	0.00346054	0.00466831	0.0052204	0.00270705	0.00236555	0.00306846	0.00416855	0.00281093	0.00406876	0.00219776	0.00337203	0.00293627	0.00520596	0.00411432	0.00494732	0.00431885	0.00336022	0.00397531	0.00410075
9939			level4			217.991	209.3	POS													0.00168695	0.00187748	0.000804859	5.49296e-05	0.0014929	0.00260059	0.00110824	0.00160829	0.00152802	0.00193454	0.00138724	0.00164812	0.00137762	0.0013227	0.0016719	0.000796221	0.00139261	0.00127303	0.00146143	0.00118944	0.00141086	0.0014389	0.00152341	0.00128305	0.00150061	0.00233666	0.00111388	0.0014456	0.00142826
9960			level4			502.813	209.2	POS													0.00595427	0.00552703	0.00152611	0.0146361	0.00429253	0.00659	0.00309265	0.00590964	0.0055809	0.00369674	0.00512856	0.00727078	0.00624302	0.00411282	0.0068382	0.00307522	0.00539492	0.00454614	0.00711713	0.00272543	0.00546291	0.00310918	0.00387893	0.00415142	0.00553598	0.00214569	0.00401751	0.00285862	0.00290922
10114			level4	9-(2-Phosphonylmethoxyethyl)-2,6-diaminopurine	-17.2676	289.206	208.8	POS													0.000242473	0.000119629	0.000112196	5.49296e-05	0.000204067	0.000108389	0.000155498	5.96137e-05	0.00032518	6.84274e-05	0.000165892	1.19552e-05	0.000473794	0.000195272	0.000255781	0.000472454	0.000287012	0.000221431	0.000335632	8.73567e-05	0.000197849	0.000221885	0.00259836	0.000629632	0.000341309	7.26178e-05	8.63794e-05	0.000109094	0.000245923
10602			level4			299.817	203.5	POS													0.000765042	0.000526349	0.000748075	0.00166634	0.000740347	0.00051532	0.000616562	0.000567836	0.00056643	0.00052818	0.000576393	0.000871812	0.000672454	0.000704615	0.000397922	0.000587546	0.000826457	0.000652683	0.000703406	0.000554431	0.00068941	0.000747794	0.000340168	0.000613462	0.000624794	0.000439744	0.00074262	0.000950791	0.00070814
10724			level4			241.058	201.1	POS													0.00300841	0.0012502	0.000397964	0.00435391	0.00040798	0.00099295	0.000254887	0.00123714	0.000619578	0.00179129	0.00258799	0.00105911	0.00110012	0.000761626	0.00206092	0.00344856	0.00077184	0.00202639	0.00022384	0.00257536	0.0015465	0.00259594	0.0141591	0.00062241	0.00235434	0.00257227	0.00174672	0.000541944	0.00222735
10756			level4			322.187	199.6	POS													0.00416255	0.000608789	0.000788462	0.0156892	0.000462362	0.000929813	0.00042876	0.000780703	0.00209221	0.0014815	0.00118612	0.00332208	0.00355286	0.00408489	0.00131306	0.00566297	0.00103917	0.00500612	0.00599019	0.000727167	0.00296545	0.00155095	0.0122752	0.00170323	0.00396978	0.000717028	0.0019044	0.0017522	0.00391451
10759			level4			323.19	199.5	POS													0.00056661	7.35748e-06	7.73968e-06	0.00108601	6.6035e-06	0.000112162	6.10878e-06	7.65125e-06	0.000259876	6.73331e-06	6.40003e-06	1.19552e-05	0.000406474	0.000428334	6.61729e-05	0.000602956	6.03329e-06	0.000558818	0.000657585	7.01008e-06	0.000240929	0.000101794	0.00157953	0.000125649	0.000455445	6.30645e-05	5.75258e-05	0.000140432	0.000347694
10783			level4			445.135	198.7	POS													0.000244065	7.35748e-06	7.73968e-06	5.49296e-05	5.80378e-05	4.60534e-05	6.10878e-06	0.000202216	6.63944e-06	9.94715e-05	6.40003e-06	1.19552e-05	6.63476e-05	0.000102214	6.71202e-06	0.000655001	6.03329e-06	6.81434e-06	0.000123968	0.000243744	9.80904e-05	7.3684e-06	0.000942351	7.40883e-06	0.000294322	6.4774e-06	6.4469e-06	0.000430843	6.97649e-06
10807			level4			405.153	197.6	POS													0.00271485	0.00110021	0.000688641	5.49296e-05	0.000124153	0.000510428	0.000153834	0.00091665	0.00163267	0.00183446	0.000680291	0.000597457	0.000849628	0.000864726	0.000228279	0.00216482	0.000110735	0.000881537	0.000412297	0.00226334	0.000939197	0.000157552	0.0394349	0.000433426	0.00460452	0.000143315	0.000766605	0.00130662	0.000335298
10808			level4	Diclosulam	3.25784	407.228	197.6	POS													0.0654458	0.0256987	0.00713839	0.0926466	0.00548468	0.0264107	0.00680927	0.0206136	0.0513477	0.0743056	0.0221806	0.0176781	0.0108394	0.0163798	0.010376	0.0638106	0.012447	0.0135009	0.0129223	0.0510158	0.0303526	0.0128857	0.227657	0.0355989	0.0732347	0.0182782	0.0188049	0.0789208	0.00843289
10810			level4	PA(22:0/20:5(7Z,9Z,11E,13E,17Z)-3OH(5,6,15))	-10.9741	828.088	197.6	POS													0.000760497	0.00103169	0.000968367	0.00230972	0.000871637	0.000418302	0.000899431	0.000706409	0.00113037	0.00107037	0.000604749	0.00103143	0.000623576	0.000746098	0.000550671	0.00108794	0.000886933	0.000727681	0.000655233	0.00083589	0.00089585	0.00044714	0.000892121	0.00110592	0.00051277	2.79501e-05	0.000265347	0.000521157	0.0006876
10814			level4			443.109	197.5	POS													0.000792347	7.35748e-06	7.05578e-05	5.49296e-05	6.6035e-06	6.35635e-06	6.10878e-06	7.65125e-06	0.00031162	0.000138484	6.40003e-06	0.000234906	7.29904e-06	7.27281e-06	6.71202e-06	0.000193786	6.03329e-06	8.25081e-05	6.99202e-06	0.000265959	0.000110994	7.3684e-06	0.00875555	7.40883e-06	0.00104081	6.4774e-06	5.40428e-05	0.000242865	6.97649e-06
10849			level4			1008.52	196.9	POS													0.00133096	0.00135115	0.00200512	0.00424636	0.00127264	0.00127948	0.00184225	0.00157024	0.00203617	0.00164668	0.00132874	0.00259621	0.00181679	0.00153567	0.00162878	0.00169083	0.00145381	0.00108474	0.0017397	0.00206317	0.00177597	0.00233675	0.00191647	0.00173255	0.00182982	0.000758967	0.00139614	0.00139313	0.00183552
10852			level4			1058.5	196.9	POS													0.000879198	0.000804516	0.00117488	0.00352056	0.00134486	0.000345832	0.000902987	0.00188836	0.00115035	0.00092302	0.00116346	0.0015678	0.00133903	0.000743558	0.00113322	0.00133696	0.00116448	0.00129586	0.000800376	0.0013349	0.00124071	0.00121128	0.000774625	0.000738492	0.00137873	0.000605087	0.00139278	0.00040574	0.000567664
10855			level4			1127.46	196.9	POS													0.00100214	0.000836769	0.00101913	0.00120943	0.000782028	0.000654607	0.000920087	0.000824032	0.00144254	0.000614718	0.00068022	0.00144331	0.00145323	0.000613105	0.00109442	0.000685762	0.000766743	0.00119223	0.000975103	0.000479203	0.00093444	0.000923397	0.000566402	0.000810192	0.00121175	6.4774e-06	0.000658151	0.00071563	0.000508064
10862			level4			898.544	196.8	POS													0.000813258	0.00108661	0.000628402	0.00227895	0.00113883	0.000682189	0.000796427	0.000939009	0.000668312	0.00113972	0.000649292	0.00142406	0.00109744	0.000940785	0.000773795	0.000957028	0.000907788	0.00058797	0.000748599	0.00102028	0.000963938	0.000717489	0.000929066	0.000872121	0.000796084	0.0012126	0.00122592	0.00117318	0.000768746
10937			level4			945.528	196.2	POS													0.00124879	0.00186248	0.00215041	0.00613001	0.00218366	0.00085317	0.00184643	0.00207739	0.00213046	0.00194798	0.00164613	0.00224647	0.00213145	0.0017391	0.00170799	0.00184053	0.00205097	0.00202627	0.00190375	0.00179116	0.00207573	0.00172923	0.00165111	0.000715878	0.00186401	0.000969804	0.00137983	0.00158079	0.00125232
11092			level4			894.566	194.7	POS													0.000644257	0.00101241	0.00172528	0.00410524	0.0013596	0.000534057	0.00116489	0.00140658	0.00113256	0.000873654	0.000886203	0.00173629	0.000577978	0.0012803	0.00125603	0.000790171	0.00118903	0.000569437	0.00114633	0.00111726	0.00122538	0.000950983	0.00113491	0.00102974	0.000564463	3.13494e-05	0.00105361	0.000712082	0.000595267
11378			level4			1035.6	190.9	POS													0.00401543	0.00490591	0.0075655	0.0195536	0.00546808	0.00230267	0.00504015	0.00470887	0.00443959	0.00409785	0.00341222	0.0061659	0.00476575	0.00533171	0.00469804	0.0043288	0.00355276	0.00381025	0.0055901	0.00618663	0.00549699	0.00597858	0.007933	0.00453299	0.00445613	6.4774e-06	0.00482096	0.000189237	0.00303034
11414			level4	Delphinidin 3,3',5'-tri-O-glucoside	-16.9396	790.659	190.8	POS													0.00585882	0.00517752	0.00712953	0.016941	0.00537196	0.00482833	0.00511225	0.00505375	0.00490949	0.0067883	0.00620355	0.00219106	0.00431575	0.00470714	0.00265743	0.0078061	0.00372387	0.0053394	0.00546306	0.00387333	0.00567258	0.00518127	0.00589867	0.00569384	0.00302046	6.4774e-06	0.00511326	0.00175372	0.00286339
11423			level4			1005.59	190.8	POS													0.00429296	0.00354211	0.00419833	0.00655057	0.00399219	0.00139569	0.00436291	0.00440314	0.00284384	0.00373792	0.00383728	0.00509335	0.00539682	0.00435375	0.00284059	0.00248846	0.0024656	0.00462401	0.00427669	0.00427598	0.00394861	0.00376857	0.00465479	0.0054123	0.0041425	6.4774e-06	0.00474558	0.000396533	0.0019139
11728			level4			317.923	189.9	POS													0.00562897	0.00633129	0.00538669	0.013656	0.00496018	0.00391898	0.00484709	0.00520957	0.00565047	0.00451348	0.00414645	0.00731619	0.00446287	0.00516272	0.00481473	0.002737	0.00416052	0.0043918	0.00542353	0.0059532	0.00543359	0.00414745	0.00606593	0.00437793	0.00371059	0.000147175	0.0026433	0.00279849	0.00370263
11802			level4	Chloramphenicol 3-acetate	-21.2961	366.166	185.4	POS													0.00184258	0.000434421	0.000600724	0.000388233	0.000140779	2.43415e-05	0.000151922	0.000337968	0.0008109	0.000575574	0.000328678	0.000496228	0.000529827	0.000423271	0.00017668	0.000537829	2.87996e-05	0.000431533	0.000293519	0.000779472	0.000466664	3.42713e-05	0.00842817	0.000146028	0.00198242	0.000135578	0.000433598	0.000818374	8.76117e-05
11822			level4			560.223	184.8	POS													0.000781262	0.000427165	5.32183e-05	0.00201508	6.92954e-05	0.0001353	2.70859e-05	7.65125e-06	0.000198	0.0011311	6.40003e-06	6.35999e-05	0.000104011	0.000330122	6.71202e-06	0.00156242	6.03329e-06	0.000231856	0.00033085	0.000798769	0.000414297	0.000338333	0.00392253	0.000168594	0.00430466	6.4774e-06	6.4469e-06	0.000890154	0.000123946
11916			level4			545.251	183.4	POS													0.000316358	6.59348e-05	7.73968e-06	5.49296e-05	6.6035e-06	6.35635e-06	8.71695e-05	7.65125e-06	2.46471e-05	0.000447972	6.40003e-06	1.19552e-05	7.29904e-06	8.24622e-05	6.71202e-06	0.000758325	6.03329e-06	6.48121e-05	4.0229e-05	0.000174677	0.000109213	0.000162035	0.00159166	4.41704e-05	0.000921055	6.4774e-06	6.4469e-06	0.000204093	3.81069e-05
11930			level4			216.026	183	POS													0.00215703	0.000392354	0.000966421	0.000432879	0.000797103	0.000232352	0.000524584	0.000911068	0.00113657	0.000424155	0.000423707	0.00174428	0.00101087	0.000891417	0.000837465	0.0011574	0.00028652	0.00110286	0.0004623	0.00125441	0.000857287	0.00154592	0.00485608	0.000761093	0.000720813	0.000329627	0.000570367	0.000814066	0.000873737
11995			level4			544.249	181.3	POS													0.00177423	0.00141131	0.000477065	0.0043695	4.60481e-05	0.00127305	6.10878e-06	0.000776071	0.00064305	0.00333299	9.98113e-05	0.00037548	0.000241753	0.000783356	6.71202e-06	0.00461822	6.03329e-06	0.000365425	0.000719228	0.00179066	0.00115581	0.00108845	0.00811625	0.000574317	0.0060479	3.43985e-05	6.4469e-06	0.00159526	0.000271498
11999			level4			146.137	181.1	POS													0.0356942	0.0192976	0.00567278	0.0158264	0.0087071	0.0137481	0.00457318	0.0175765	0.00895836	0.00960679	0.0157068	0.0172846	0.0218818	0.0294261	0.0126073	0.0422442	0.0114958	0.0684783	0.0132134	0.0155339	0.0193767	0.0079405	0.34656	0.0350739	0.0426172	0.0115409	0.0130399	0.0155603	0.00878489
12031			level4			465.253	180.5	POS													0.00318014	0.00189308	0.0014052	5.49296e-05	0.000260254	0.00074985	4.82783e-05	0.000643692	0.00168991	0.00306935	0.000832335	0.000503544	0.000617063	0.000808202	0.000136705	0.0033186	8.07278e-05	0.000679157	0.000150847	0.00354098	0.00118314	3.36905e-05	0.040572	0.000825298	0.00737386	2.48146e-05	0.000383661	0.00174031	4.32855e-05
12300			level4			374.106	175.4	POS													0.000595638	0.000567783	0.00170213	0.00726814	0.00153899	0.00280223	0.000363829	0.000862215	0.000552747	0.00120495	0.000138646	0.000492692	0.000689429	0.00147944	0.000503792	0.00381393	0.000137217	0.00244082	0.000406531	0.00142979	0.00144955	0.00169345	0.00736732	0.00552545	0.00219665	0.000114394	0.00103666	0.000888862	0.0004808
12304			level4			301.159	175.2	POS													0.000643085	0.000165614	2.75137e-05	5.49296e-05	2.76075e-05	6.35635e-06	0.000161004	0.00025996	0.000290885	0.00055576	0.000234488	0.000176507	0.00121499	0.000473119	2.33359e-05	0.00146738	6.03329e-06	0.000309032	6.99202e-06	0.000260255	0.000318242	7.3684e-06	0.0112274	0.000289901	0.000843078	6.4774e-06	2.96934e-05	8.1334e-05	6.97649e-06
12362			level4			198.043	173.8	POS													0.00926968	0.00731483	0.0117265	0.0109955	0.0337515	0.0065019	0.0101529	0.0111562	0.0117402	0.0088586	0.00888916	0.0133011	0.0104844	0.0091646	0.00971455	0.00568896	0.0108809	0.00834783	0.0297903	0.00849751	0.0118114	0.0100567	0.0388764	0.00697099	0.031228	0.0122471	0.0092184	0.039072	0.00926853
12394			level4			450.992	173.1	POS													0.000604408	8.49492e-05	0.000669838	5.49296e-05	0.000784914	6.35635e-06	0.000946396	0.000910835	0.00112124	7.57107e-05	0.000590272	0.00146308	0.00131543	0.000582308	0.00116706	0.000467765	0.000965211	0.000452613	0.000639855	0.000488843	0.0006696	0.000523037	0.000243176	4.32784e-05	0.000584274	2.5472e-05	0.000397672	0.000619099	0.00057807
12410			level4			447.196	172.8	POS													3.58782e-05	9.30917e-05	7.73968e-06	5.49296e-05	6.6035e-06	6.35635e-06	6.10878e-06	3.7605e-05	2.46963e-05	6.73331e-06	6.40003e-06	5.26331e-05	7.29904e-06	7.27281e-06	6.71202e-06	0.000742552	6.03329e-06	6.81434e-06	6.99202e-06	7.01008e-06	5.6473e-05	0.000256329	6.06749e-05	7.40883e-06	0.000265415	6.4774e-06	3.11247e-05	5.93157e-06	6.97649e-06
12437			level4	Nocloprost	7.54003	401.99	172.3	POS													0.000372537	0.000879685	0.000822974	5.49296e-05	0.000230967	6.35635e-06	0.000823878	0.00091703	0.000197355	0.000503353	0.000478133	0.00082377	0.00113471	0.000546893	0.000268852	0.00100724	0.000358291	0.000682146	0.00101028	0.000610007	0.000586469	0.00185614	0.000930273	8.84241e-05	0.00167035	0.000539888	0.000538805	0.000204059	0.000224317
12524			level4			707.312	171.4	POS													0.000168099	0.000380142	7.73968e-06	5.49296e-05	0.000288521	6.35635e-06	6.10878e-06	0.000335424	8.07353e-05	0.000386515	4.78094e-05	0.000250813	0.000349836	0.000575569	3.01885e-05	0.00027882	6.03329e-06	0.000352107	0.000198951	0.000980778	0.000239274	0.000426926	0.0028673	7.40883e-06	0.00162087	6.4774e-06	0.000419674	0.000284346	0.000257686
12530			level4			269.044	171.3	POS													0.000727051	0.000464413	0.00110076	5.49296e-05	0.00190887	0.000134991	0.000867774	0.000849062	0.000924293	0.000530174	0.000485585	0.00083113	0.000844364	0.000665896	0.000641307	0.00114581	0.000612585	0.000682561	0.00131097	0.000786873	0.00077847	0.00245464	0.000671097	0.000406687	0.0011858	0.00203573	0.00222491	0.00246084	0.00108043
12533			level4			353.181	171.3	POS													0.000884641	0.000315799	8.05375e-05	5.49296e-05	0.000552969	0.000102441	0.00012926	0.000116555	0.000649341	0.000912812	0.000196616	0.000591906	0.000709885	0.000965347	5.47426e-05	0.00473055	3.12228e-05	0.00117856	0.00103054	0.00065707	0.000697286	0.000315181	0.00646848	0.000540973	0.000881098	0.000201573	9.67875e-05	0.00141512	0.000153543
12539			level4			314.993	171.2	POS													0.00106644	0.00048924	0.000640539	5.49296e-05	0.00119916	6.35635e-06	0.00042066	0.000597907	0.000713823	0.000287709	0.000453561	0.00126003	0.000583733	0.00100389	0.000376735	0.000505071	0.000286392	0.00054089	0.000743278	0.000449728	0.000584003	0.00125179	0.000917294	0.000108676	0.00047352	0.00159078	0.00129006	0.00130467	0.000837019
12550			level4			334.038	170.9	POS													0.000525457	0.000172379	0.000496589	5.49296e-05	0.000924497	6.35635e-06	0.000438928	0.00053644	0.00048968	0.000279799	0.00035615	0.000681021	0.000575899	0.00046246	0.000377654	0.000745927	0.000302934	0.000402287	0.000674588	0.000471184	0.000448758	0.00121488	0.000434566	6.39349e-05	0.000779294	0.00113652	0.00137273	0.00103601	0.000838863
12556			level4			243.164	170.8	POS													0.00137942	0.000624016	0.000660241	5.49296e-05	0.000461217	6.35635e-06	0.000521895	0.000587371	0.000196829	0.000288918	0.000492531	0.000573727	0.000656176	0.000610968	0.000569925	0.00212594	0.000557192	0.00109501	0.000472553	0.000651784	0.00062935	0.000606475	0.00338287	0.00051546	0.00105586	0.000576029	0.000571073	0.000388286	0.000489256
12562			level4			471.043	170.8	POS													0.000117907	0.000332941	0.000258154	5.49296e-05	2.29242e-05	0.000420366	0.000268514	0.000106785	7.46192e-05	0.000250332	0.00024873	0.000463806	7.29904e-06	0.000304572	6.71202e-06	0.000831723	4.62893e-05	6.81434e-06	5.03523e-05	0.000284612	0.000207919	0.000315081	0.00193112	6.47683e-05	0.00112982	2.70674e-05	0.00019259	5.73337e-05	6.97649e-06
12570			level4			293.012	170.7	POS													0.000561357	0.000170033	0.000443567	5.49296e-05	0.000763288	0.00153165	0.000422024	0.000522703	0.000455409	0.000119968	0.000297771	0.000865474	0.000596152	0.000597846	0.000360417	0.000614152	0.000312875	0.000559803	0.000646684	0.000572075	0.000523409	0.00107488	0.00061235	0.00012463	0.000778906	0.000807407	0.00104844	0.000816097	0.000754371
12625			level4	2,2-Dimethylpropanoyloxymethyl (4R,5S,6S)-6-[(1R)-1-hydroxyethyl]-4-methyl-7-oxo-3-[(3R)-5-oxopyrrolidin-3-yl]sulfanyl-1-azabicyclo[3.2.0]hept-2-ene-2-carboxylate	10.9496	441.522	170.3	POS													0.000199456	7.35748e-06	7.73968e-06	5.49296e-05	4.36637e-05	6.35635e-06	0.000215533	0.000312105	6.63944e-06	8.61812e-05	0.000174967	0.000670082	6.10347e-05	0.000295801	6.17947e-05	0.00089985	4.53065e-05	6.81434e-06	6.99202e-06	0.000176429	0.000166952	0.000167201	0.0016544	7.40883e-06	0.00131561	6.4774e-06	9.186e-05	5.93157e-06	0.000238345
12713			level4			263.037	170	POS													0.00105553	0.000283051	0.000563285	0.00260826	0.000763498	0.000395423	0.000570218	0.000795877	0.000766334	0.0103111	0.000547977	0.000935156	0.0125175	0.000746801	0.000842201	0.00536388	0.00084005	0.010012	0.000764711	0.000671659	0.00256773	0.000353292	0.000625231	0.00536296	0.000570133	0.0212233	0.000509644	0.0187216	0.000852513
12910			level4			325.037	169.7	POS													0.000321049	0.000499141	0.000458175	5.49296e-05	0.000247553	0.000735624	0.000306372	0.000540104	0.000443493	0.000717094	0.000274301	0.000934328	0.00033683	0.000586319	0.000151295	0.000192911	0.000214203	0.000286709	0.000545775	0.000593855	0.000422003	0.000509377	0.000296935	0.000985079	0.000376053	0.00036094	0.00030602	0.000553606	0.00019344
12952			level4			155.081	168.4	POS													0.0257112	0.00822521	0.00972058	0.0636219	0.00388679	0.00659661	0.0218117	0.0121478	0.0120925	0.0101661	0.0127338	0.0378208	0.0306059	0.0370027	0.0191273	0.0587192	0.0111416	0.109048	0.0127224	0.0330833	0.0267993	0.0222334	0.082618	0.0312953	0.0189538	0.0177234	0.0311537	0.0209871	0.0338848
13003			level4			315.006	167	POS													0.00159749	0.000459539	0.000332851	5.49296e-05	0.000404998	6.35635e-06	0.000601205	0.000359949	0.000688928	0.000477324	0.000200831	0.00106784	0.000353172	0.0012991	0.000218966	0.000501249	0.000588959	0.00101392	0.00138037	0.000243678	0.000592582	0.00018317	0.000911889	0.000889776	0.000643713	0.000344198	0.00171849	0.00146499	0.000185945
13018			level4			297.007	166.7	POS													0.00108968	0.00035013	0.00156502	5.49296e-05	0.00198013	0.000101071	0.00147368	0.00223012	0.00355681	0.00065173	0.000901062	0.00136154	0.00319848	0.00119823	0.00140452	0.000584308	0.00202291	0.00123235	0.00163834	0.00318143	0.00148882	0.00299046	0.00160888	0.00044034	0.00233458	0.00503132	0.00119635	0.00139477	0.00190397
13036			level4			459.01	166.4	POS													0.000591565	0.000563848	0.000691308	5.49296e-05	0.000729233	6.35635e-06	0.000755647	0.000653973	0.000227362	8.04132e-05	0.000503013	0.000215054	0.00012908	0.000581131	0.000150445	0.000900547	0.000115333	3.26268e-05	0.000164023	0.000439652	0.000379277	0.00225068	0.00106415	0.000402937	0.0023097	0.000366899	0.000225986	0.000340791	0.000400458
13077			level4			308.028	165.9	POS													0.000665444	0.000730751	0.000512891	0.00131127	0.000206811	6.35635e-06	0.000621304	0.000535819	0.000211737	9.14333e-05	0.000492879	0.000575481	0.000264823	0.000607526	0.000137064	0.00198718	0.000228846	0.000791632	0.000424556	0.000282761	0.000534329	0.000877323	0.00240254	7.40883e-06	0.00185841	2.45689e-05	0.000261506	0.000359494	0.000677546
13089			level4			237.018	165.8	POS													0.000283533	4.53296e-05	3.61096e-05	5.49296e-05	0.000131998	6.35635e-06	0.000353002	0.000242392	0.000333091	6.73331e-06	7.22112e-05	0.000771917	0.000437371	0.000752157	0.000199206	0.000765812	9.58291e-05	0.000348135	0.000453213	0.000124184	0.000275675	0.000314828	0.00101607	7.40883e-06	0.000641022	0.00034624	0.000592052	0.000454815	0.000345881
13092			level4			296.021	165.8	POS													0.000339841	0.00104647	0.000264656	5.49296e-05	0.000104241	6.35635e-06	0.000746346	0.000381956	0.000118675	0.000461762	0.000483831	0.00131248	7.54481e-05	0.000503919	0.000139447	0.00177521	0.00017887	8.26963e-05	0.000132399	0.000242412	0.000422597	0.000951357	0.00104509	0.00114426	0.00184412	0.000247752	0.000182987	0.000198048	0.00016916
13107			level4	3,3',4,4'-Tetrachloroazoxybenzene	-0.525611	336.997	165.7	POS													0.000302496	0.000655838	0.000554291	5.49296e-05	0.000266203	6.35635e-06	0.000757293	0.000340737	0.000180797	0.000133392	0.000581473	0.00084795	0.000122696	0.000521686	0.00010768	0.00124652	0.000311904	8.43465e-05	0.000110982	0.000384426	0.0003786	0.00108892	0.000895564	7.40883e-06	0.00177059	0.000286486	0.000444132	0.000104063	0.000386327
13139			level4			300.965	165.3	POS													0.00359403	0.00231442	0.000631041	0.00227504	0.000941476	0.000179582	0.000525611	0.000455533	0.000844329	0.00012133	0.000383478	0.00283888	0.000818403	0.00319509	0.000754406	0.00572505	0.00098345	0.000783185	0.000567466	0.000228315	0.00140801	0.00403124	0.0107956	0.0156528	0.000299253	0.00160061	0.000520793	0.00117011	0.00115918
13146			level4			317.12	165.2	POS													0.000949645	0.0261827	0.00092937	0.0419413	0.0151372	0.0165309	0.000712506	0.000820402	0.000859521	0.000523589	0.00134712	0.0179029	0.0148975	0.000891265	0.000678119	0.000886685	0.000741549	0.000865686	0.00114931	0.000567487	0.00722574	0.00059218	0.000623586	0.001698	0.000763676	0.000610407	0.00071082	0.000665628	0.000642227
13150			level4			548.246	165.2	POS													0.00191001	0.00147341	0.000957411	5.49296e-05	0.00076856	0.000232671	0.00016716	0.000461226	0.00106628	0.00228423	0.000461002	0.000730162	0.000523879	0.00247477	0.000177843	0.00341038	6.59992e-05	0.000848702	0.00360247	0.00227758	0.00119743	0.00128292	0.00742676	0.0012568	0.00444898	0.000199868	0.000359192	0.00153876	0.000735081
13160			level4			134.032	165	POS													0.000420696	0.000497011	0.000951853	5.49296e-05	0.000937307	6.35635e-06	0.000754806	0.00115446	0.000954249	0.00120128	0.000946693	0.000665483	0.000784057	0.00063935	0.000658965	0.0010471	0.000746285	0.000337707	0.000745593	0.000851568	0.000717787	0.000911191	0.00027798	0.00178123	0.0010407	0.00132386	0.000623374	0.00101946	0.000912229
13164			level4			549.249	165	POS													0.00050334	0.000306499	0.000184992	5.49296e-05	0.000146757	6.35635e-06	6.10878e-06	4.02294e-05	0.000198165	0.000456928	4.34833e-05	6.90275e-05	7.29904e-06	0.000547565	4.17585e-05	0.000812803	6.03329e-06	0.000186887	0.000975137	0.000477132	0.000253572	0.000275583	0.00167635	7.40883e-06	0.0013274	6.4774e-06	6.4469e-06	0.000292421	6.97649e-06
13247			level4			285.047	163.7	POS													0.00103247	0.00129545	0.0012816	5.49296e-05	0.000458316	0.00259778	0.00101442	0.000573197	0.000327001	0.00209941	0.0006329	0.00067589	0.00026984	0.0018822	0.000382971	0.00126542	0.000356545	0.000357189	0.000673913	0.00112553	0.000917849	0.000973763	0.00166397	0.00492652	0.00222576	0.000445856	0.00071503	0.000528899	0.000514504
13277			level4	Curium	-1.5247	248.007	163.3	POS													0.00302516	0.000756676	0.0018359	5.49296e-05	0.0015413	6.35635e-06	0.00138111	0.00171785	0.00154285	0.000645343	0.00091308	0.00322726	0.00171028	0.00325433	0.00153356	0.00403259	0.00160514	0.00328193	0.00291678	0.00195451	0.00184685	0.00133374	0.00515942	0.000156198	0.00251918	0.00184276	0.00129545	0.00132271	0.00385995
13287			level4			101.018	163.2	POS													0.000863197	0.000754396	0.000743548	5.49296e-05	0.000355096	0.000466382	0.000407977	0.000557764	0.000327223	0.00058178	0.000490518	0.000414162	0.000373333	0.000678294	0.000642079	0.000854633	0.000598602	0.000326868	0.000698986	0.000443558	0.000531666	0.000535395	0.00160165	0.00204917	0.000521105	0.000453297	0.000494423	0.000346842	0.000557733
13304			level4			286.035	163.1	POS													0.00339925	0.000371799	0.00180383	5.49296e-05	0.00165743	0.000182905	0.000889752	0.00243636	0.00225417	8.59691e-05	0.000834841	0.00358533	0.00185595	0.00336518	0.00175357	0.00328739	0.000988313	0.0049555	0.00162592	0.00234454	0.00188665	0.0018628	0.00473629	0.000921744	0.00458671	0.00107634	0.00300869	0.00226874	0.00410613
13398			level4			112.157	161.1	POS													0.000776428	0.000391175	0.00119829	0.00500808	0.00190092	0.00134774	0.000687262	0.000589698	0.000474731	0.000821233	0.00160376	0.000206862	0.00101953	0.00108328	0.00153918	0.000180347	0.00139557	0.00148494	0.00172619	0.000894192	0.00121647	0.000817708	0.000148143	0.00110366	0.000716591	0.000565552	0.00107764	0.00066634	0.00150344
13409			level4	Propantheline chloride	-4.39815	404.948	160.9	POS													0.000711642	7.35748e-06	0.00108456	5.49296e-05	0.00103405	3.35895e-05	0.00113366	0.00158672	0.0014942	6.73331e-06	0.00100133	0.00133332	0.00184432	0.000571257	0.000824463	0.000320442	0.00101859	0.000874941	0.000834906	0.000755798	0.00082634	0.000650954	9.43177e-06	0.000140223	0.000225809	0.000323692	0.000510929	0.00119739	0.0013335
13471			level4			246.16	159.4	POS													0.000457854	0.000418707	0.000603421	5.49296e-05	0.000590385	0.000258941	0.000161403	0.000546564	0.000215085	0.000594058	0.000445586	0.000738967	0.000379398	0.00062654	0.000500135	0.00037434	0.000631522	0.000448069	0.000438269	0.000459561	0.000447187	0.00056312	0.00192458	0.000374346	0.000711817	0.000538593	0.000687337	0.000478607	0.000431619
13514			level4			303.012	157.3	POS													0.00426194	0.00165893	0.0049554	0.000830428	0.00517234	0.00234464	0.00497916	0.00629027	0.00369045	0.00201044	0.00614941	0.00979813	0.00734739	0.00516973	0.00675953	0.00426178	0.00550025	0.00444101	0.00537548	0.0033433	0.004717	0.00596727	0.00219013	0.00281836	0.00230623	0.000830153	0.00399308	0.0046737	0.00493069
13516			level4			320.978	157.2	POS													0.00119623	0.00183747	0.00163363	0.00831211	0.00246578	0.00071204	0.00124906	0.00159781	0.00225788	0.00211072	0.00114648	0.00153174	0.00138386	0.000905601	0.00108262	0.000395038	0.00223358	0.000983129	0.00170057	0.00135156	0.00180435	0.0010291	0.000219411	0.00115217	0.000335334	0.000169396	0.00143041	0.000961487	0.00173582
13522			level4			509.017	157	POS													0.00220689	0.00025131	0.00310321	5.49296e-05	0.00331198	0.000707295	0.00407586	0.00213834	0.00258428	0.000657002	0.00315881	0.00612705	0.0046604	0.0025307	0.00405445	0.00179412	0.00396778	0.00154552	0.00297416	0.00128174	0.00255929	0.0018195	0.000529335	0.00178564	0.000740472	8.32906e-05	0.00169666	0.00239443	0.00243987
13525			level4	Zonisamide	-3.65931	213.232	156.9	POS													0.00192997	0.000728077	0.00602479	0.0134979	0.00149427	0.00397996	0.00105248	0.00165938	0.000747102	0.00862237	0.0073008	0.000586418	0.000749349	0.000860994	0.00227718	0.00102465	0.00050671	0.00159185	0.00148384	0.0102068	0.00331625	0.00192674	0.000887268	0.000579093	0.00205765	0.0005333	0.00207727	0.000944903	0.00174039
13536			level4	Nebularine	-4.26838	253.233	156.6	POS													0.00239977	0.00100917	0.00173578	5.49296e-05	0.00232618	0.00106258	0.00150494	0.00408252	0.00252245	0.00207327	0.00296769	0.00178473	0.00138148	0.00264893	0.00123418	0.00526427	0.000635444	0.0031344	0.00143356	0.00338703	0.00213217	0.00153846	0.0133152	0.00141307	0.00938424	0.0013763	0.00208548	0.00191274	0.00227571
13573			level4			468.041	156.2	POS													0.00626267	0.0033228	0.00846469	5.49296e-05	0.00853661	0.00341679	0.0104614	0.00562835	0.0103406	0.00264635	0.00809688	0.00685043	0.0171018	0.00597968	0.00903685	0.00553015	0.0102954	0.00486529	0.00627088	0.00434953	0.0068756	0.00823229	0.00177292	0.00573073	0.00189256	4.91298e-05	0.00493811	0.00579303	0.00576544
13575			level4			484.015	156.2	POS													0.00125128	0.000391336	0.00207383	5.49296e-05	0.00277079	0.0007121	0.00253603	0.00114016	0.00240638	0.000340655	0.00180475	0.00554498	0.0031606	0.00119747	0.00231707	0.00127729	0.00202927	0.00120793	0.00130658	0.000966821	0.00172451	0.00184809	0.000111837	0.00117121	0.000329127	2.67154e-05	0.000654255	0.00156981	0.0013619
13576			level4			511.991	156.2	POS													0.00200606	0.000218272	0.00305888	5.49296e-05	0.00382323	0.00121049	0.00377871	0.00223994	0.0029633	0.000497471	0.00270074	0.00443848	0.00554632	0.00183468	0.00377065	0.0011841	0.00433053	0.00164728	0.00284062	0.00157148	0.00248581	0.00183007	0.000152315	0.00184143	0.000384586	6.4774e-06	0.00173188	0.00226328	0.00209993
13585			level4	O-Carbamoyl-L-serine	-1.1923	149.124	156.1	POS													0.0428289	0.0328229	0.0426311	0.0210708	0.0395319	0.0410648	0.0346443	0.0422246	0.0401252	0.0397394	0.0353644	0.0328324	0.0323755	0.0410238	0.0371324	0.031125	0.0368156	0.0403625	0.0418586	0.04287	0.0374222	0.0344798	0.0507874	0.0411011	0.0472974	0.0451684	0.0382984	0.041872	0.0447342
13616			level4	Malathion dicarboxylic acid	1.54384	275.26	156	POS													0.00140026	0.00050715	0.00121575	5.49296e-05	0.0010138	0.00134931	0.000436005	0.00207173	0.000852491	0.00140416	0.000717176	0.00133717	0.00050647	0.00101098	0.000879385	0.00138646	0.000838757	0.00134879	0.00112935	0.00188471	0.00106724	0.000679433	0.00249228	0.00113872	0.00271113	0.00271221	0.00132559	0.00135679	0.00192839
13625			level4			628.026	156	POS													0.000260012	6.37923e-05	0.000557954	5.49296e-05	0.00100008	0.000169142	0.00135315	0.00021915	0.000971705	5.68611e-05	0.000761341	0.00374497	0.00176587	0.000512314	0.00113641	0.000593703	0.000943778	0.000321168	0.000505674	0.000221587	0.00076068	0.000700987	9.43177e-06	0.000588582	6.82087e-06	6.4774e-06	0.00026631	0.000391926	0.000175036
13644			level4			610.053	155.8	POS													0.0142768	0.00720198	0.0221187	0.00152101	0.0232744	0.010959	0.0358367	0.0101372	0.0277349	0.00417096	0.0198921	0.0940902	0.0558043	0.0141117	0.0289534	0.0193957	0.0272264	0.0106547	0.0135806	0.00687503	0.0223908	0.0225163	0.00244686	0.0192657	0.00246088	6.4774e-06	0.00854589	0.0134551	0.00878224
13645			level4			611.056	155.8	POS													0.00268803	0.00129055	0.00416815	5.49296e-05	0.0045766	0.00225197	0.00697085	0.00211913	0.00565565	0.000785859	0.00388307	0.0194802	0.0105396	0.00280867	0.00564075	0.00368531	0.00516461	0.00194565	0.00251817	0.00114812	0.00436879	0.00454771	0.00034596	0.00338538	0.000531516	6.4774e-06	0.0015639	0.00234156	0.00170022
13648			level4	PS(16:0/PGF1alpha)	-3.5603	837.058	155.8	POS													0.000182546	3.88834e-05	0.000859057	5.49296e-05	0.00072399	0.000386263	0.00150666	7.65125e-06	0.00106508	6.73331e-06	0.00068059	0.00328844	0.00196452	0.000277921	0.00119704	0.000687146	0.000871283	0.00016592	0.000257494	6.28674e-05	0.000714251	0.000495667	9.43177e-06	0.0006347	6.82087e-06	6.4774e-06	0.000189901	0.000303428	0.000213369
13671			level4			259.958	155.5	POS													0.00235609	0.00102455	0.00346665	0.0227195	0.00526464	0.00285483	0.00634084	0.00293644	0.00345503	0.000877926	0.00339874	0.00947092	0.00397094	0.00228229	0.00539656	0.00315214	0.00290034	0.00258863	0.00198572	0.00237347	0.00444081	0.00347791	0.000926536	0.00176763	0.00149354	0.000402299	0.00113488	0.00269467	0.00230178
13676			level4			412.053	155.5	POS													0.00575003	0.00220882	0.00756704	5.49296e-05	0.00699868	0.00509063	0.00934478	0.00423737	0.00777627	0.00160912	0.00606034	0.0201524	0.0121567	0.00450793	0.00804727	0.005605	0.00716948	0.0041033	0.00472703	0.00329559	0.00632313	0.00619977	0.00173364	0.00664661	0.00155814	4.0699e-05	0.00377809	0.00493598	0.00377642
13677			level4			427.023	155.5	POS													0.0253419	0.0121478	0.0371263	0.00238385	0.0439702	0.026553	0.0514838	0.0211739	0.0365927	0.00775587	0.0327572	0.110511	0.0570808	0.0228519	0.0473018	0.0305491	0.0362947	0.0211662	0.0210207	0.0158507	0.0329957	0.0343354	0.00868204	0.0259437	0.00816855	0.000564533	0.0141149	0.0250546	0.0190828
13678			level4			428.026	155.5	POS													0.00261866	0.00123975	0.00410585	5.49296e-05	0.00460398	0.00296972	0.00562564	0.00232273	0.00439135	0.000802269	0.00382309	0.0126117	0.00616121	0.00254381	0.0053976	0.00333376	0.0038174	0.00231733	0.00227182	0.00186476	0.00364387	0.00389962	0.000740959	0.00276092	0.000917058	6.4774e-06	0.00147939	0.00282367	0.00227022
13679			level4			429.021	155.5	POS													0.0019372	0.000663226	0.00299438	5.49296e-05	0.00340392	0.00180351	0.00357108	0.00125274	0.00260967	0.000343561	0.00236441	0.00707146	0.00394372	0.00175675	0.00342778	0.00188783	0.00239224	0.00166815	0.00149806	0.00132918	0.00229869	0.0025772	0.000526373	0.00194684	0.00055294	2.9989e-05	0.00102421	0.00187788	0.00538608
13680			level4			442.997	155.5	POS													0.00281516	0.00151044	0.00424564	5.49296e-05	0.00596789	0.00330441	0.00692866	0.00261978	0.00417037	0.000655486	0.00422391	0.0161235	0.00586188	0.00249673	0.00622462	0.0031577	0.00355876	0.00277556	0.0022685	0.00182922	0.00403966	0.00428032	0.0003767	0.00219263	0.000647	2.77927e-05	0.00110786	0.00275588	0.0018513
13681			level4			449.005	155.5	POS													0.00656315	0.00186554	0.00908969	5.49296e-05	0.0109503	0.00561719	0.0102955	0.00627609	0.00867824	0.00168982	0.00844405	0.0107906	0.00983085	0.00493751	0.0109257	0.00507514	0.00765216	0.00553534	0.00534552	0.00497723	0.00672974	0.00629356	0.00153572	0.00543957	0.0020842	6.4774e-06	0.00431413	0.00618408	0.00600808
13688			level4	PC(16:0/20:3(5Z,8Z,11Z)-O(14R,15S))	7.17132	799.109	155.5	POS													0.00136333	0.000339201	0.00227477	5.49296e-05	0.0019247	0.00127921	0.00354648	0.000751845	0.00278913	0.000188037	0.00182648	0.00862235	0.00533267	0.00107444	0.00271781	0.00187267	0.00221215	0.000888873	0.00094248	0.000512741	0.00202571	0.00194806	9.81896e-05	0.00198143	6.82087e-06	6.4774e-06	0.000602353	0.00115275	0.000625428
13692			level4			411.049	155.4	POS													0.0507539	0.0223925	0.0653451	0.0042457	0.0646111	0.045057	0.0839131	0.0390028	0.0714653	0.0174357	0.0566859	0.202691	0.116081	0.042702	0.0744692	0.0543908	0.068637	0.0385023	0.0415879	0.0291701	0.059457	0.0595415	0.0177307	0.0592189	0.0144606	0.00105708	0.0340749	0.0455545	0.0367546
13693			level4			413.055	155.4	POS													0.00129336	0.000473723	0.00128456	0.00102355	0.00127179	0.000947713	0.00157698	0.000954052	0.00126395	0.000493478	0.00125809	0.00328602	0.00201702	0.000791134	0.00135719	0.000859259	0.00136257	0.000535033	0.00100881	0.000755782	0.0011907	0.000868306	0.000194539	0.000811621	0.000561637	0.0017894	0.000864215	0.000747529	0.000658818
13694			level4			433.031	155.4	POS													0.0078654	0.00208023	0.00985748	5.49296e-05	0.00911837	0.00594703	0.0103426	0.00694261	0.010567	0.00224935	0.0079626	0.00992831	0.00973551	0.00605975	0.0107205	0.00603051	0.0103541	0.00638217	0.00670351	0.00522663	0.00720643	0.00644652	0.00217704	0.0077938	0.00230945	0.000288349	0.00600471	0.00745685	0.00729457
13697			level4			616.07	155.4	POS													0.00142212	0.000225749	0.0018723	5.49296e-05	0.00172744	0.00112803	0.00213356	0.000976791	0.00204617	0.00023334	0.00146495	0.0030356	0.00235148	0.00111254	0.00194209	0.0011764	0.00194673	0.00096416	0.000780904	0.000681606	0.00136384	0.000852464	9.43177e-06	0.00142527	0.000185738	6.4774e-06	0.000909724	0.0010665	0.00103218
13703			level4			579.125	155.3	POS													0.00109767	0.00174394	0.00190778	0.00572867	0.00174919	0.000649869	0.00259438	0.000997714	0.00208333	0.000654194	0.00131112	0.003675	0.00324614	0.00197059	0.00197687	0.00078312	0.00240651	0.000645746	0.00232937	0.000520414	0.00190358	0.00187872	0.000971577	0.00235081	6.82087e-06	6.4774e-06	0.000687876	0.00101443	0.000560585
13713			level4			766.148	154.9	POS													0.000580634	0.000121411	0.00084508	0.0010499	0.000802665	0.000657303	0.000987162	0.000391971	0.000932084	0.0011544	0.000815789	0.000900046	0.00122986	0.000302871	0.000996201	4.72174e-05	0.00116194	0.000298821	0.00049763	0.000346549	0.000705976	0.000390177	9.43177e-06	0.000696938	6.82087e-06	6.4774e-06	0.000324808	0.000532063	0.000362468
13715			level4			256.094	154.8	POS													0.00139714	0.00135675	0.00190624	0.00900488	0.00100921	0.00176089	0.00121433	0.00181194	0.000647896	0.000945701	0.00176739	0.00131286	0.00126362	0.00213746	0.00259614	0.00281349	0.000726783	0.00536645	0.00054645	0.00199291	0.00207893	0.00232262	0.0318261	0.00320974	0.00311937	0.00401614	0.00224303	0.000295077	0.0118647
13738			level4			398.137	154.5	POS													0.00301527	0.00178596	0.00406951	5.49296e-05	0.00414956	0.00296634	0.00480861	0.00330433	0.00440044	0.00200185	0.00358776	0.00724488	0.00626634	0.00272408	0.00424829	0.0020536	0.00412818	0.00234895	0.00281728	0.0025435	0.00342598	0.00349158	0.00119731	0.0038106	0.00149344	0.000382542	0.00240866	0.00306158	0.00261338
13740			level4			561.127	154.5	POS													0.00168509	0.000756931	0.00204876	0.00157378	0.00219028	0.00170972	0.00167624	0.00153901	0.00200005	0.000751996	0.00191842	0.00121969	0.0021738	0.00150464	0.00209068	0.000628239	0.0020431	0.00114531	0.00173349	0.00118559	0.00157874	0.00154335	9.43177e-06	0.00168873	0.000280985	6.4774e-06	0.00133777	0.00132964	0.00145366
13783			level4			420.118	153.8	POS													0.00226849	0.000747468	0.000259039	5.49296e-05	0.00171231	0.000473794	0.00025066	0.000315024	0.000562193	0.000597769	0.000371183	0.00147611	0.000991958	0.00371218	0.000778641	0.000329952	0.000407724	0.00174235	0.000172717	0.0022783	0.000975139	0.000218172	0.0171028	0.000232528	0.00323938	0.000130721	0.000344567	0.000294585	0.000291174
13804			level4			302.039	153.5	POS													0.00362181	0.000743047	0.00395449	5.49296e-05	0.00181353	0.00118004	0.00221536	0.00221337	0.00171339	0.00151792	0.000859518	0.00214318	0.00139773	0.00240731	0.00140934	0.00413127	0.000398903	0.00287151	0.00129472	0.000311178	0.00181263	0.00249388	0.012811	0.00151763	0.00816234	0.000593903	0.000337582	0.00283861	0.00121915
13809			level4			395.19	153.5	POS													0.000388616	3.9227e-05	0.000788511	5.49296e-05	0.000277612	9.54897e-05	9.63502e-05	0.000253809	9.94569e-05	7.56293e-05	6.40003e-06	0.000236632	0.000266303	0.000799482	8.43779e-05	0.000261827	4.06882e-05	0.00159939	0.000193537	0.000896009	0.000327714	0.000308151	0.00518076	0.000456344	0.000451153	0.000416888	0.000641614	0.000171349	0.00050279
13817			level4			395.202	153.4	POS													0.00123304	3.85924e-05	0.000953679	5.49296e-05	0.000276804	9.61062e-05	0.000122121	0.000258818	9.94994e-05	0.000100207	6.40003e-06	0.000234179	0.000266009	0.000832133	8.36631e-05	0.0061933	4.08073e-05	0.00197532	0.000194024	0.00107772	0.000706868	0.000308495	0.00644783	0.00045639	0.000456943	0.000422966	0.000688839	0.000171631	0.000503875
13818			level4			398.221	153.4	POS													0.00512477	0.001644	0.0052081	5.49296e-05	0.00400302	0.00230696	0.0012221	0.0067473	0.00114653	0.00234898	0.000463428	0.00251415	0.00313455	0.00597395	0.00191272	0.00781542	0.000807067	0.00408999	0.00185912	0.00490264	0.00316399	0.00380984	0.0114321	0.00251823	0.00299768	0.000419787	0.00315498	0.00248167	0.00304562
13861			level4			367.202	153.2	POS													0.000306754	7.24368e-05	0.000229523	5.49296e-05	0.000275549	0.000253627	0.000235246	0.000483837	0.00043264	0.000336783	0.000261127	0.000487654	0.000242461	0.000205303	0.000207782	0.000578241	0.000195309	0.000494791	0.000276144	0.000509046	0.000306959	0.000261479	0.000513635	0.000382156	0.000280327	0.000614324	0.000375432	0.00031843	0.000440854
13864			level4			399.224	153.2	POS													0.00113926	0.000239223	0.00089095	5.49296e-05	0.000645141	0.000356836	0.000198456	0.00126527	0.000322423	0.000548973	6.40003e-06	0.000369064	0.000881058	0.00100696	0.000294934	0.00198302	0.00019467	0.000712393	0.000282588	0.000919313	0.000615593	0.000634662	0.00199016	0.000290728	0.00052096	0.000153313	0.000479923	0.000577481	0.000571892
13901			level4			302.063	152.7	POS													0.0713096	0.0169839	0.062397	0.0510152	0.0513033	0.0323607	0.016527	0.0615699	0.0148077	0.0207022	0.00534791	0.054126	0.0367525	0.0916222	0.0233049	0.1936	0.0100981	0.0888447	0.0215864	0.0608204	0.049254	0.0498367	0.221712	0.0390872	0.151711	0.00376228	0.0302597	0.0345335	0.0401155
14026			level4	IDP	-15.5928	429.187	150.7	POS													0.00316403	0.000484292	0.0022702	0.00091248	0.00148534	0.000299093	0.000185503	0.00285567	0.000453738	0.000261146	5.59621e-05	0.00358374	0.0013701	0.00464139	0.000628602	0.0137687	5.09044e-05	0.0046834	0.000426049	0.00288719	0.00222338	0.00317761	0.0207116	0.00146258	0.00332691	6.67491e-05	0.00261681	0.00136312	0.00215491
14148			level4			214.948	149.1	POS													0.000163573	0.000879346	0.00117218	5.49296e-05	0.00148535	0.000354608	0.000576244	0.00193736	0.000656233	0.000582639	0.000791922	0.00406516	0.00031734	0.000561523	0.00062261	0.000938205	0.000426523	0.000707857	0.000314918	0.00126727	0.000893789	0.00313723	0.00289521	0.000872966	0.00175037	0.000291321	0.00154915	0.00161087	0.00108495
14152			level4			275.01	149.1	POS													0.000552843	0.000518631	0.000682293	5.49296e-05	0.000917164	0.000180033	0.000288987	0.00145405	0.00057064	0.00048679	0.000808123	0.00211107	0.000224187	0.000563489	0.000296531	0.000742738	0.000335322	0.000427573	0.000298642	0.000791092	0.000615256	0.00153997	0.00292727	0.000568809	0.00130657	0.000175557	0.0011841	0.0010637	0.000683084
14238			level4			482.201	146	POS													0.000575497	0.000833608	0.000331131	0.00204053	4.61666e-05	6.35635e-06	9.80474e-05	2.94109e-05	0.000491147	0.000860833	0.000172264	1.19552e-05	2.37445e-05	0.000477282	5.02084e-05	0.00121991	1.93142e-05	0.000349129	8.95138e-05	0.000451503	0.000408878	7.3684e-06	0.0210956	0.000139415	0.00165487	6.4774e-06	2.90184e-05	0.000462164	3.22253e-05
14265			level4			274.981	145.1	POS													0.000631213	0.00133747	0.000246707	5.49296e-05	0.000895581	0.000495906	0.000498569	0.0013583	0.000674558	0.000825552	0.00167867	0.00159243	0.000216886	0.000527095	0.000425702	0.000779768	0.000378929	0.000389017	0.000374551	0.000753696	0.000706777	0.0013066	0.00304258	0.000570845	0.00124452	0.000200124	0.0011099	0.00104033	0.000701889
14305			level4			399.161	143.9	POS													0.00141268	0.000548954	0.00317366	0.00184096	0.00158715	0.000511032	0.000396357	0.00102824	0.000923074	0.000968633	0.000156662	0.00118142	0.000889084	0.00361991	0.000159823	0.0027857	0.000339177	0.00137285	0.0004302	0.00167372	0.00124996	0.00245548	0.0102533	0.000654996	0.00213429	0.000262367	0.000970182	0.00115944	0.00126069
14366			level4			341.969	142.4	POS													0.00117126	0.00168173	0.000224148	5.49296e-05	0.0010476	0.00197201	0.00146317	0.00110946	0.000118597	0.0010199	0.00183513	0.000893817	9.174e-05	0.00134857	0.000211879	0.00216943	0.000263056	0.000226745	0.000628374	0.00114128	0.000933642	0.000535924	0.00496845	0.000305466	0.00406497	0.000205929	0.000512335	0.00157626	0.000611295
14447			level4			544.129	140.9	POS													0.000368089	7.35748e-06	0.00076672	5.49296e-05	0.000166322	6.35635e-06	0.000259779	0.000142413	6.63944e-06	0.000168861	6.40003e-06	0.000600201	7.29904e-06	0.000527915	6.71202e-06	0.00124392	6.03329e-06	6.81434e-06	6.99202e-06	9.76514e-05	0.00022287	0.00046628	0.0117296	7.40883e-06	0.00721117	6.4774e-06	2.89247e-05	0.000625906	6.97649e-06
14524			level4			694.422	140.5	POS													0.000833359	0.000961498	0.000817004	0.0136397	0.000709337	0.0261213	0.00118277	0.00376429	0.00180734	0.00100907	0.000491852	0.00150789	0.00677444	0.00217754	0.0146723	0.00115052	0.00069063	0.00114548	0.0034135	0.00104095	0.00419554	0.000860171	0.000977681	0.000703768	0.00247235	0.000595461	0.000665058	0.00151007	0.0005576
14542			level4			449.195	140.3	POS													8.04405e-06	2.68847e-05	0.000114079	5.49296e-05	6.6035e-06	3.01484e-05	0.00010541	7.65125e-06	6.63944e-06	7.65989e-05	6.40003e-06	0.000188773	4.55488e-05	9.63697e-05	6.71202e-06	0.000618309	6.03329e-06	0.000652987	6.99202e-06	7.01008e-06	0.000103606	0.000102774	0.00430874	2.64337e-05	0.00237143	6.4774e-06	6.4469e-06	8.26396e-05	6.97649e-06
14790			level4			316.81	134	POS													0.000276957	0.000303446	0.000153773	0.00152914	0.000182121	8.3197e-05	0.000232445	0.000190535	0.000167196	0.000177745	0.000127985	0.000201253	7.29904e-06	0.000181462	0.00027015	0.000124119	0.000119754	0.000189465	0.000148108	0.00019538	0.000243077	2.78445e-05	5.3537e-05	0.000215295	0.000121132	0.000187853	0.00010756	0.000144291	9.58447e-05
14806			level4	(R)-Rutaretin 1'-(6''-sinapoylglucoside)	16.2124	631.611	133.8	POS													0.000183175	0.000162816	0.000122684	0.000663255	0.000136335	4.19849e-05	9.05595e-05	6.88661e-05	0.000129939	0.000109338	5.07104e-05	0.000142117	9.84446e-05	0.000150097	0.0001537	5.48917e-05	0.00014299	0.000129222	0.000116428	0.000219137	0.000148335	0.000118887	0.000116145	0.000141672	0.000120777	7.73359e-05	0.00011739	7.13436e-05	0.000101848
14819			level4			760.461	133.5	POS													8.04405e-06	0.00105884	7.73968e-06	0.012927	6.70614e-05	0.0219769	0.00202116	0.0136147	0.000427895	0.000206245	0.00030822	0.000578282	0.00532468	0.00201153	0.0142432	0.000985443	2.79114e-05	0.00217697	0.00102115	0.000302228	0.00396476	7.3684e-06	0.000313862	3.42047e-05	0.00232455	9.06453e-05	6.4469e-06	0.00277532	6.97649e-06
14832			level4	Cucurbitacin H	-6.87624	535.685	133	POS													0.000133915	0.000259202	0.000206383	0.000623512	0.000239436	0.000180149	0.000269817	0.00022639	0.000410601	0.000179594	0.000144304	0.000967348	0.000254983	0.000156651	0.000517879	0.00019489	0.000222425	0.000140394	0.000182765	0.00039949	0.000295506	8.71892e-05	5.79384e-05	0.000185118	0.000129221	0.000219266	0.000161328	0.000165464	0.000114475
14882			level4			738.949	131.5	POS													8.04405e-06	0.00101389	3.19692e-05	0.0165261	6.6035e-06	0.0358898	0.00195002	0.0134843	0.00070594	0.000303668	0.000166114	0.000968328	0.00681605	0.00236888	0.0160303	6.9597e-06	6.03329e-06	0.00193468	0.00207738	0.00117112	0.00507331	2.84064e-05	9.43177e-06	7.40883e-06	0.00367164	2.16392e-05	2.8499e-05	0.00285458	7.38026e-05
14936			level4			716.435	130.1	POS													8.23761e-05	0.00275206	3.38012e-05	0.0311454	0.000220834	0.0486041	0.00452291	0.0279647	0.00172408	0.00117561	0.000815649	0.00271819	0.00904316	0.00446404	0.0236316	3.96748e-05	2.70046e-05	0.00368357	0.0057475	0.00146477	0.00849305	7.3684e-06	6.88639e-05	6.3729e-05	0.00647825	0.000100894	8.32735e-05	0.00428164	6.12869e-05
14937			level4	(2E)-3-(3,5-Bis(tert-butyl)-4-hydroxyphenyl)-1-(4-methoxyphenyl)prop-2-en-1-one	9.67061	716.936	130.1	POS													3.15448e-05	0.00126386	7.73968e-06	0.0134838	0.000164285	0.035462	0.00206584	0.0197459	0.000665615	0.000466658	0.000486271	0.000846368	0.0098443	0.00329197	0.0158925	6.9597e-06	6.21133e-05	0.00382204	0.00427178	0.0010151	0.00564484	7.3684e-06	9.43177e-06	2.69522e-05	0.0046422	0.000122435	5.71497e-05	0.00296648	6.97649e-06
15030			level4			695.424	128.2	POS													0.000465419	0.000953033	7.85811e-05	0.011526	0.000296993	0.0272439	0.00101126	0.0137565	0.000754281	0.000281777	0.000352643	0.00262229	0.00516873	0.0017647	0.0117053	0.000246319	0.000118998	0.00183902	0.0018772	0.00116994	0.00416165	0.000209603	4.31416e-05	2.7656e-05	0.00237487	0.000135718	0.000199953	0.00133543	0.000122298
15103			level4			694.422	126.6	POS													0.00159182	0.00303383	0.00089391	0.0331881	0.00164818	0.0669508	0.00465855	0.0497251	0.00233959	0.00128105	0.00147089	0.00769254	0.0143449	0.00500643	0.0341028	0.000927026	0.000596059	0.00543257	0.00600427	0.00262214	0.0121755	0.000912103	0.000380637	0.00044624	0.00638196	0.00053248	0.000617236	0.00406826	0.000836635
15154			level4			672.91	125.9	POS													8.04405e-06	0.00270342	3.01984e-05	0.0200401	0.000297093	0.0554448	0.00324147	0.036795	0.000946359	0.00120202	0.000929971	0.00195899	0.0177442	0.00374015	0.0377576	6.9597e-06	0.000132044	0.00416138	0.00589486	0.00228525	0.009766	6.59971e-05	9.43177e-06	7.40883e-06	0.00532965	0.000134732	4.40114e-05	0.00233793	6.97649e-06
15155			level4			673.412	125.9	POS													8.04405e-06	0.000949047	7.43169e-05	0.00604151	6.6035e-06	0.0313998	0.0014229	0.0165725	0.000773243	0.000548699	0.000181936	0.00140668	0.00688057	0.00178518	0.0159326	6.9597e-06	6.03329e-06	0.00184704	0.00252108	0.000362695	0.00443638	5.40879e-05	9.43177e-06	3.306e-05	0.00198353	6.4774e-06	2.68966e-05	0.000818295	6.97649e-06
15159			level4			672.409	125.8	POS													0.000131744	0.00414872	9.3735e-05	0.0336134	0.000332998	0.0843242	0.00724682	0.0561026	0.00179815	0.00193257	0.00145287	0.00507672	0.0273573	0.00534451	0.0580258	0.000470244	0.00030042	0.00881577	0.00648089	0.00277844	0.0152914	0.000433593	0.000217772	0.000394726	0.00865368	0.000319487	0.000141506	0.00312806	2.92143e-05
15168			level4			724.458	125.6	POS													0.000168428	0.00947651	0.000271503	0.0431002	0.0316324	0.000363945	0.000288926	0.000605427	0.000248519	0.00183979	0.00028603	0.00343357	0.00801706	0.000802365	0.0246374	0.000390674	0.000156792	0.000352092	0.000283885	0.00113683	0.00637462	0.000218564	0.000328375	0.00024303	0.000509043	0.000142858	0.000196878	0.000117588	0.000131105
15212			level4	PE(14:0/15:0)	-2.1182	650.897	124.5	POS													3.38564e-05	0.00281663	0.000152779	0.0203826	0.00034971	0.079491	0.00368842	0.031546	0.00206144	0.00102594	0.00125801	0.00230733	0.0217713	0.00566142	0.0349733	6.9597e-06	0.000154345	0.00498532	0.00643868	0.00238698	0.0110746	0.000121844	9.43177e-06	3.63314e-05	0.00637116	0.000124207	4.62059e-05	0.00186494	6.97649e-06
15236			level4			650.395	124.3	POS													0.00110067	0.00748462	0.00122536	0.037219	0.00146225	0.130328	0.00880169	0.0507957	0.00385851	0.00266961	0.00215013	0.00583971	0.0252034	0.0112269	0.071446	0.00118749	0.00105174	0.00976799	0.0091893	0.00499825	0.0193503	0.000991001	0.000986003	0.00106141	0.00881737	0.00125315	0.00082922	0.00549812	0.000602677
15246			level4			530.234	124.2	POS													0.000798464	7.35748e-06	0.000636738	5.49296e-05	0.000137247	0.00012564	0.000164588	0.00067491	0.000148558	0.000106395	6.40003e-06	0.000231862	0.000750874	0.00107861	4.96911e-05	0.00188464	2.52926e-05	8.80656e-05	0.000114642	7.01008e-06	0.000354596	0.000425213	0.00419338	0.000524436	0.00146927	6.4774e-06	0.000150665	7.14416e-05	0.000361091
15278			level4			651.398	123.9	POS													6.2528e-05	0.00130658	0.00012811	0.00760794	0.000255746	0.0288663	0.00190517	0.0130818	0.00108077	0.000322336	0.000355943	0.00111583	0.00902627	0.00217112	0.0145617	0.000124795	0.000122073	0.00255154	0.00250944	0.00115025	0.00441532	0.000134901	9.43177e-06	0.000132076	0.00281825	4.04261e-05	9.22383e-05	0.00109411	3.2281e-05
15384			level4			628.884	122	POS													8.04405e-06	0.00347928	7.73968e-06	0.0169634	0.000470244	0.0824146	0.00533334	0.0375058	0.00227594	0.000714464	0.00092045	0.00349689	0.0229042	0.00554391	0.0496115	0.000180643	4.96785e-05	0.0058077	0.00643731	0.000984254	0.0122555	4.12202e-05	9.43177e-06	9.74751e-05	0.00396936	8.08789e-05	6.10787e-05	0.00147196	3.99738e-05
15391			level4			628.382	121.8	POS													0.000390712	0.00510283	0.000195214	0.0265975	0.000341746	0.117372	0.00865099	0.0673473	0.00353158	0.00154386	0.00177488	0.00474781	0.0297673	0.00920909	0.067549	0.0021241	0.000364232	0.00938829	0.0108984	0.00356381	0.018523	0.000277628	0.000153151	0.000165474	0.00525865	0.000302863	0.000236826	0.00252926	0.000212006
15412			level4			629.385	121.2	POS													9.41114e-05	0.000973943	4.49828e-05	0.00250538	8.43716e-05	0.0271588	0.00166412	0.0138956	0.000369924	0.00015749	0.000197239	0.000769104	0.00968331	0.00226813	0.019075	0.000181218	5.61133e-05	0.0019418	0.00240502	0.000437319	0.00419815	0.000179624	0.000112317	2.44755e-05	0.00161923	2.37082e-05	3.05491e-05	0.000651147	6.97649e-06
15446			level4	Calcium oxalate	-18.5531	129.102	120.3	POS													0.0739092	0.0691133	0.0723898	0.0992072	0.065262	0.0583139	0.00781283	0.0741566	0.0645894	0.00593136	0.00276772	0.121403	0.0715491	0.00503407	0.00188202	0.00846772	0.0569605	0.0057133	0.0620778	0.0688042	0.0497672	0.0046426	0.0145495	0.00406384	0.0648515	0.0603074	0.00326271	0.00353914	0.00326052
15497			level4	Vicianose	-13.0547	313.274	119.8	POS													8.04405e-06	7.35748e-06	7.73968e-06	5.49296e-05	6.6035e-06	6.35635e-06	5.65012e-05	7.65125e-06	7.65058e-05	0.000132648	6.40003e-06	1.19552e-05	7.29904e-06	0.000154211	6.71202e-06	0.000630029	3.48123e-05	0.000173382	0.000181111	7.01008e-06	7.88629e-05	6.58295e-05	0.000609944	2.99033e-05	0.000164035	6.4774e-06	6.4469e-06	5.51313e-05	6.97649e-06
15520			level4			370.173	119.4	POS													0.000737332	0.000311623	0.000352605	0.00125615	0.000550684	0.000305884	0.000205639	0.000815338	0.000288172	0.000540837	0.000186613	0.00173951	0.00104839	0.00169543	0.000321177	0.00328495	0.000201617	0.00353237	0.000364168	0.000602928	0.00091707	0.000408381	0.0220535	0.0004083	0.00691969	0.000840381	0.000247334	0.000407588	0.000577886
15585			level4			606.871	118.5	POS													9.4407e-05	0.00365485	3.78681e-05	0.0108764	0.000395501	0.0698483	0.00554201	0.0333656	0.00177381	0.00110589	0.000848277	0.00202146	0.0227849	0.00494648	0.0438484	6.9597e-06	0.000147989	0.00488302	0.00559117	0.00301966	0.0107396	3.5464e-05	9.941e-05	2.95495e-05	0.00609583	0.000170033	6.56302e-05	0.000838542	3.0603e-05
15768			level4			584.356	116.1	POS													0.000309623	0.00522771	0.000362933	0.0228873	0.000522801	0.104481	0.00808025	0.0557267	0.00340144	0.00181799	0.00174533	0.00850543	0.0419901	0.00835389	0.070886	0.00506561	0.000634056	0.00892781	0.0100128	0.00385657	0.0181398	0.000341844	0.00109082	0.000358334	0.0101019	0.000463962	0.000133421	0.00188256	0.000260059
15804			level4	Chromoionophore I	-18.2862	584.858	115.8	POS													8.04405e-06	0.00328621	7.73968e-06	0.00747873	0.000562697	0.0595184	0.00459431	0.032988	0.00156007	0.00108678	0.000772892	0.00264009	0.0202752	0.00460945	0.0392579	6.9597e-06	6.03329e-06	0.00469844	0.0056224	0.000542878	0.00947616	7.3684e-06	9.43177e-06	7.40883e-06	0.00551932	8.77443e-05	6.4469e-06	0.000704547	6.97649e-06
15807			level4			781.42	115.8	POS													8.04405e-06	0.000170773	7.73968e-06	5.49296e-05	5.77953e-05	6.35635e-06	6.10878e-06	5.11045e-05	6.63944e-06	5.77593e-05	6.40003e-06	1.19552e-05	7.29904e-06	0.000745016	6.71202e-06	0.00511142	6.03329e-06	6.81434e-06	0.000159718	7.01008e-06	0.000324782	0.00116625	0.00155565	0.000186454	0.000498043	6.4774e-06	6.4469e-06	6.74727e-05	6.97649e-06
15898			level4			687.432	115	POS													0.000349535	0.000709286	5.14272e-05	0.0297998	0.000346785	0.00485893	0.00071866	0.00100534	0.000368868	0.000607552	0.000391264	0.0113516	0.0223703	0.000530501	0.00908198	0.000151216	0.00019831	0.000435961	0.000125532	0.00215481	0.00428039	0.000222371	0.000340237	7.40883e-06	0.000920765	0.000120217	0.000372931	0.000127651	0.000203438
15974			level4	3,4-dihydroxy-5-all-trans-hexaprenylbenzoate	16.5948	562.845	114.3	POS													0.000119656	0.00228973	0.000108566	0.00462226	0.000420217	0.0484165	0.00390345	0.0291155	0.00164662	0.000466473	0.000463484	0.00113971	0.0149449	0.00428052	0.0350156	6.9597e-06	0.000201447	0.00308757	0.00470723	0.000962588	0.00779595	7.3684e-06	9.43177e-06	7.40883e-06	0.00454391	6.4774e-06	8.20041e-05	0.000276694	6.35793e-05
16007			level4	2,4-Diamino-6-dimethylamino-1,3,5-triazine	0.800379	155.184	113.9	POS													0.00312155	0.00264033	0.00260511	0.0149021	0.00255676	0.0024279	0.0025986	0.00276972	0.00298977	0.00286734	0.00212524	0.00414002	0.00296399	0.00275297	0.00202068	0.00243176	0.00140578	0.00224293	0.0019478	0.00276007	0.00321352	0.00333448	1.48346	0.00267046	0.00250546	0.00318294	0.0020589	0.00260026	0.00118927
16060			level4	SPIROMUSTINE	18.2103	337.273	113.3	POS													0.00100907	0.000281156	7.48276e-05	5.49296e-05	6.6035e-06	6.35635e-06	0.00063677	0.000137309	0.000167409	0.000498604	0.0001101	0.00204099	7.17152e-05	0.000303468	6.71202e-06	0.00139207	0.000252282	0.00045877	0.000162224	7.01008e-06	0.000383919	0.000311803	0.00584249	0.000286018	0.000261045	8.0122e-05	6.76095e-05	8.55526e-05	0.000194261
16119			level4			481.311	112.8	POS													0.0161783	0.00253838	0.00134922	0.00641903	0.00119144	0.00117578	0.00794724	0.00630084	0.0016545	0.00238922	0.000312506	0.0451238	0.00639607	0.00823562	0.0113831	0.0245873	0.00298979	0.0106807	0.00188656	0.00242244	0.00805809	0.00863443	0.098361	0.00744767	0.0134537	0.000324666	0.000739073	0.00324889	0.00234161
16160			level4			832.696	112.5	POS													0.000404086	7.16213e-05	5.6131e-05	0.000820995	0.000134812	5.96364e-05	0.000597235	0.000116768	0.000201376	0.000182815	4.90848e-05	0.00151802	0.000294468	0.000460246	0.000419712	0.00440735	0.000852568	0.000472978	0.000587089	0.000293029	0.000600001	0.000254087	0.00596256	0.000453531	0.000437129	6.4774e-06	6.4469e-06	0.000663521	9.78171e-05
16173			level4			831.693	112.4	POS													0.00105636	0.000382095	7.73968e-06	0.00302087	0.0003266	0.000240627	0.00114377	0.000706352	0.000826353	0.000654672	6.74317e-05	0.0040508	0.00129091	0.00140111	0.0017021	0.00920645	0.00179833	0.00162905	0.00110929	0.000811436	0.00157162	0.00106695	0.0122278	0.00100241	0.00186318	6.4774e-06	0.00033398	0.00175736	0.00021648
16227			level4			507.327	111.6	POS													0.000812442	0.000433326	0.00116558	0.0017161	0.000829329	0.000706594	0.000453697	0.000337381	0.000541135	0.000425583	0.000241453	0.00145795	0.000667438	0.000843463	0.000371785	0.0026582	0.000753748	0.000747698	0.000783736	0.000589742	0.000826819	0.000945413	0.00548198	0.000552919	0.000901513	0.000326728	0.00045191	0.000240405	0.000883131
16230			level4			765.39	111.6	POS													0.00151533	7.35748e-06	7.73968e-06	5.49296e-05	6.6035e-06	6.35635e-06	5.51969e-05	0.000499649	6.63944e-06	6.73331e-06	6.40003e-06	0.00149773	7.29904e-06	0.000606979	6.53674e-05	0.000574438	6.03329e-06	0.000729105	6.99202e-06	7.86718e-05	0.000287278	0.000379639	0.00675716	0.000310106	0.000583689	6.4774e-06	6.4469e-06	0.000182789	5.3716e-05
16236			level4	Pyridoxal phosphate	-9.21171	248.147	111.4	POS													0.0192954	0.010637	0.0250245	0.0116354	0.00128079	0.0047824	0.0274143	0.019427	0.00304063	0.00560022	0.00300833	0.109988	0.00377862	0.00867361	0.00471345	0.0275497	0.00708615	0.0186173	0.00751199	0.0129788	0.0166022	0.0300383	0.12113	0.130895	0.0055348	0.00906285	0.0187245	0.00630153	0.00636969
16249			level4			502.292	111.3	POS													0.0658102	0.00886294	0.00643721	0.013663	0.00221133	0.00305763	0.0193937	0.0188903	0.00306203	0.00585225	0.000436064	0.149068	0.0254634	0.0282621	0.00946715	0.0413317	0.0076363	0.0475592	0.0112532	0.00960127	0.023866	0.0213657	0.382837	0.0258758	0.0414843	0.00341953	0.00321324	0.0163335	0.012411
16277			level4			525.277	110.9	POS													0.00284697	6.44764e-05	6.63032e-05	5.49296e-05	6.6035e-06	0.000605658	0.000909204	0.000520253	4.00155e-05	0.000100223	6.40003e-06	0.00481047	0.00142555	0.000874953	0.000278889	0.000849496	0.000301827	0.00240398	0.000332302	0.000202583	0.000835054	0.000809049	0.00809613	0.00104167	0.00133583	4.96367e-05	6.00073e-05	0.000597851	0.000396595
16304			level4	Streptidine 6-phosphate	14.9699	343.259	110.5	POS													0.00105023	0.000645837	0.000184751	0.00289508	6.6035e-06	0.000952633	0.000698052	0.000395745	0.000504994	0.000459794	0.000426914	0.00020221	0.00023317	8.89327e-05	9.57102e-05	0.00101293	0.000913758	0.000573453	0.000415022	0.000503855	0.000612984	0.000465288	0.000954817	0.000542194	0.000158453	6.4774e-06	0.00021713	0.00039841	6.97649e-06
16330			level4			552.306	110.1	POS													0.00148853	7.35748e-06	7.73968e-06	0.00164747	6.6035e-06	6.35635e-06	0.000751742	0.000288285	0.000172373	0.000191487	6.12463e-05	0.00258111	7.29904e-06	0.000573167	9.44672e-05	0.000725155	0.000410264	0.000752734	0.000425311	0.000170861	0.000518478	0.000474166	0.00585217	0.000566585	0.000876082	6.4774e-06	0.000188533	0.000681459	5.19356e-05
16365			level4	dTDP-4-oxo-2,6-dideoxy-L-allose	8.34109	531.326	109.6	POS													0.00317944	0.000146201	0.000142655	0.000733017	4.59842e-05	5.15722e-05	0.00122527	0.00138677	0.00019933	0.000211233	6.40003e-06	0.00946538	0.00108318	0.00159418	0.00132227	0.00467674	0.00040807	0.00185109	0.000428927	0.0005708	0.00143643	0.00123902	0.024221	0.00133974	0.00237499	6.4774e-06	6.4469e-06	0.00161488	6.97649e-06
16371			level4			807.436	109.5	POS													0.00325996	0.000252858	0.000394399	5.49296e-05	0.000155192	6.35635e-06	0.000700379	0.00232111	6.63944e-06	0.000561069	6.40003e-06	0.00626519	7.29904e-06	0.00352545	0.00121713	0.00437232	6.03329e-06	0.000320063	7.47334e-05	0.000775409	0.00121415	0.0026379	0.00273302	0.0014092	0.00352587	6.4774e-06	0.000127781	0.000402144	0.000154113
16396			level4			808.44	109.2	POS													0.00110367	7.35748e-06	7.00042e-05	5.49296e-05	6.6035e-06	6.35635e-06	0.000212668	0.000473341	6.63944e-06	5.11399e-05	6.40003e-06	0.00214414	7.29904e-06	0.000974748	0.000195954	0.000231122	6.03329e-06	6.81434e-06	6.99202e-06	0.000299956	0.000293608	0.000834747	0.000911282	0.000526377	0.00117375	6.4774e-06	4.51414e-05	0.000208603	6.97649e-06
16399			level4			141.158	109.1	POS													0.000696612	0.000435456	0.000344542	0.00150319	0.000699879	0.000563889	0.000556037	0.000392588	0.000765423	0.000728018	0.000697274	0.000217361	0.000568328	0.000312681	0.000615751	0.000275647	0.000585929	0.000598151	0.000731791	0.000580233	0.000593439	0.000718273	9.43177e-06	0.000488658	0.000489174	0.000482997	0.000595151	0.000506524	0.000682035
16467			level4			565.319	107.9	POS													0.00100066	0.00085793	0.000894752	0.00657447	0.000950682	0.00244396	0.00114045	0.00275956	0.00102722	0.00114129	0.000365661	0.00119275	0.000808326	0.000748209	0.00204459	0.0003961	0.000566361	0.000934122	0.000800185	0.00106351	0.00138554	0.00119189	0.000612358	0.00082383	0.000637588	0.000698587	0.000822375	0.000414338	0.000964446
16548			level4			502.814	107.2	POS													0.00323026	7.35748e-06	0.000185001	5.49296e-05	0.000704732	0.000180234	0.00160465	0.00336964	0.000667533	0.000758535	6.40003e-06	0.0030616	0.00213641	0.00847988	0.00301189	0.0140692	0.00189235	0.00518581	0.00217698	0.00287436	0.00268289	0.00219741	0.0213778	0.00158513	0.00508402	3.78595e-05	0.00073566	0.00481261	0.00113004
16558			level4	PE(14:0/14:1(9Z))	15.3403	634.865	107.1	POS													0.00203906	7.35748e-06	0.000129384	5.49296e-05	0.00031726	6.35635e-06	0.000317581	0.00194532	4.88939e-05	7.37311e-05	6.40003e-06	0.00118077	0.000316702	0.00445996	0.000213072	0.00567919	6.03329e-06	0.00188693	0.000324684	0.00212702	0.00105703	0.0010404	0.00675169	0.000183471	0.00140369	6.4774e-06	0.000437591	0.00138148	0.000133679
16573			level4			990.663	106.9	POS													0.0012256	7.35748e-06	7.73968e-06	5.49296e-05	0.000135752	6.35635e-06	0.000818949	0.00183177	6.31936e-05	0.000213746	6.40003e-06	0.00356642	0.00131148	0.00625349	0.0021792	0.0216832	0.00179823	0.00414601	0.00136943	0.000745494	0.00237124	0.00141009	0.0205963	0.00063417	0.00361122	6.4774e-06	0.000225448	0.00263718	7.15746e-05
16596			level4			769.561	106.3	POS													0.000108995	7.35748e-06	7.73968e-06	5.49296e-05	6.6035e-06	6.35635e-06	0.000560157	7.65125e-06	0.000156911	0.000113693	6.40003e-06	0.00150727	8.44216e-05	0.000359314	0.000987157	0.00154068	0.00229001	0.000448186	0.000945591	0.000132766	0.000466609	0.000284426	0.00340372	0.000240895	0.00116149	6.4774e-06	6.43072e-05	0.00251971	5.60708e-05
16620			level4	Gallocatechin-(4alpha->8)-epigallocatechin	14.2885	611.535	105.9	POS													0.00251783	0.000508393	7.73968e-06	0.0114114	0.00208917	0.0116442	0.0039337	0.00169811	0.00580113	0.0115822	0.000451008	0.00141067	0.0137649	0.0320815	0.00667758	0.0455398	0.0162573	0.021837	0.0194262	0.0028647	0.0105752	0.00478034	0.376991	0.00375165	0.0212317	0.000638893	0.00545298	0.0219946	0.000871259
16621			level4	Cyanidin 3-(6-p-caffeoyl)glucoside	6.25222	612.538	105.9	POS													0.000576159	4.52839e-05	7.73968e-06	0.00427416	0.000698324	0.00452627	0.00155463	0.000497513	0.00221849	0.00430949	7.82062e-05	0.000223186	0.00507551	0.0126059	0.00281377	0.0169125	0.00621773	0.009253	0.00558312	0.000730713	0.00391008	0.0019168	0.153762	0.00138273	0.00852681	0.000127701	0.00195443	0.00845775	8.99447e-05
16640			level4	Chlorhexidine acetate	-6.51682	626.554	105.5	POS													0.00422846	0.000116345	7.73968e-06	0.01564	0.00339392	0.0105825	0.00528388	0.00184194	0.00931437	0.0110954	0.000502537	0.00126775	0.0150974	0.0413272	0.00823405	0.0517771	0.0141805	0.0255247	0.0248488	0.00319307	0.0123729	0.00671361	0.389015	0.00383612	0.0187701	0.000569853	0.00421135	0.033963	0.000474316
16641			level4			788.671	105.5	POS													0.00965093	0.00212215	0.000852606	0.0199588	0.00124077	0.0012577	0.0045759	0.00438078	0.00237181	0.00218029	0.000458066	0.00619766	0.00255392	0.00738925	0.00454631	0.00760544	0.00451278	0.00438772	0.00391549	0.00373085	0.00469446	0.00337013	0.037643	0.00323739	0.00369776	0.000255865	0.000711837	0.00716344	0.00197868
16644			level4	Safflomin A	0.527971	613.541	105.4	POS													8.04405e-06	4.53065e-05	7.73968e-06	5.49296e-05	6.6035e-06	0.000699702	6.10878e-06	7.65125e-06	0.000336312	0.000747211	6.40003e-06	1.19552e-05	0.000708449	0.00272909	0.000202017	0.00237561	0.00126903	0.00196699	0.00115636	7.01008e-06	0.000617626	7.52241e-05	0.0317946	6.50986e-05	0.00177087	6.4774e-06	0.000233551	0.00182269	6.97649e-06
16659			level4			801.681	105.3	POS													0.00237083	0.000634184	7.73968e-06	0.000947713	6.6035e-06	0.000161637	0.00106842	0.00126198	0.00122235	0.000845522	7.96137e-05	0.00213872	0.00051892	0.00213034	0.00134042	0.00323018	0.00136619	0.00113232	0.00191718	0.000735601	0.00115582	0.00104959	0.0135951	0.000900865	0.00220034	6.4774e-06	0.000227892	0.00216146	0.00031646
16660			level4			841.713	105.3	POS													0.00144288	7.35748e-06	7.73968e-06	5.49296e-05	6.55019e-05	7.95018e-05	0.00107989	0.000310718	0.000986962	0.000261681	6.40003e-06	0.000522372	0.000740135	0.00199177	0.00202114	0.00241179	0.00237389	0.00159544	0.00165087	0.000610506	0.000911074	0.000860758	0.020308	0.000661676	0.00107179	6.4774e-06	6.4469e-06	0.00254324	6.97649e-06
16685			level4			90.4097	104.6	POS													0.00348122	0.000101661	7.82511e-05	0.00153213	0.000148824	0.000273676	0.00268175	0.00149231	0.00050689	0.00100408	6.40003e-06	0.00663446	0.00254971	0.0105298	0.00702009	0.021382	0.0028334	0.00806868	0.00195135	0.00172129	0.0036999	0.00164138	0.0759325	0.00186158	0.00606566	2.82168e-05	9.92676e-05	0.00245178	0.000439032
16686			level4			90.5212	104.6	POS													0.00151724	0.000596376	0.000277772	0.00265322	0.000228008	0.000104686	0.00124196	0.000352127	0.000189267	0.000284921	0.000245707	0.00266575	0.0013864	0.00464575	0.00331831	0.0107034	0.00121125	0.00355367	0.00079816	0.000717025	0.00183455	0.000805775	0.0364807	0.000860163	0.00311198	0.000371138	0.000232312	0.000965771	0.000293436
16699			level4			814.687	104.6	POS													0.0727431	0.00671158	0.00760688	0.133438	0.0105001	0.0145873	0.0479019	0.0354341	0.0182669	0.0258655	0.00212987	0.120867	0.055036	0.158172	0.113016	0.322254	0.0501963	0.13077	0.0385654	0.0400405	0.0702051	0.040506	0.966296	0.047062	0.109978	0.00224017	0.0108598	0.0473633	0.0178607
16700			level4			816.694	104.6	POS													0.00546008	0.000577108	0.000245234	0.00604291	0.000628584	0.00092399	0.00406172	0.00276781	0.00221828	0.00197041	0.000167669	0.00728289	0.0043421	0.0122858	0.0089339	0.0151148	0.00534151	0.00882035	0.0038987	0.00252096	0.00468024	0.00318122	0.0691814	0.00381808	0.00839865	6.4774e-06	0.000428806	0.0052443	0.000556139
16701			level4			817.699	104.6	POS													0.000282624	7.35748e-06	7.73968e-06	5.49296e-05	6.6035e-06	6.35635e-06	0.000289141	0.000161387	0.000322324	5.09429e-05	6.40003e-06	1.19552e-05	0.000193619	0.00120375	0.000787421	0.00182033	0.000698649	0.00087818	0.000103605	9.66544e-05	0.000349498	8.50991e-05	0.0119366	0.000147055	0.000689051	4.75358e-05	6.4469e-06	0.000702529	6.97649e-06
16731			level4	Sipoyl-CoA	3.72116	974.74	104.1	POS													0.0136643	7.35748e-06	0.0001119	5.49296e-05	0.000666521	0.00161408	0.0100857	0.00648601	0.0015037	0.00339397	6.40003e-06	0.0144249	0.0104618	0.0322432	0.0175571	0.00239453	0.00538504	0.0263134	0.00536312	0.00779315	0.00797655	0.00609889	0.0288061	0.00685458	0.014267	6.4774e-06	0.00129796	0.000991748	0.00262769
16753			level4			1098.76	104	POS													0.0007187	7.35748e-06	7.73968e-06	5.49296e-05	8.18e-05	6.35635e-06	4.92421e-05	0.000544868	6.63944e-06	6.73331e-06	6.40003e-06	0.000259626	0.000237944	0.00270661	0.000498069	0.00392588	6.03329e-06	0.00163503	6.99202e-06	0.000113022	0.000543999	7.3684e-06	0.0132842	7.40883e-06	0.00135684	6.4774e-06	6.4469e-06	0.000302697	6.97649e-06
16776			level4			845.617	103.6	POS													0.00293348	4.38555e-05	7.73968e-06	5.49296e-05	6.6035e-06	0.000562201	0.00259676	0.00124737	0.000546152	0.000771723	6.40003e-06	0.00415555	0.00200294	0.00575453	0.00429939	0.00244813	0.0016779	0.00646999	0.00158142	0.0012589	0.0019213	0.00175794	0.00779491	0.00159016	0.00366885	6.4774e-06	6.20789e-05	7.62441e-05	0.000490852
16784			level4			95.8476	103.4	POS													0.00900428	7.35748e-06	6.02648e-05	5.49296e-05	0.000619391	0.00137345	0.009549	0.00408988	0.00133564	0.00261674	6.40003e-06	0.0136167	0.00706142	0.0286763	0.0145115	0.0104895	0.00511695	0.0268128	0.00390913	0.00488321	0.00718974	0.00465085	0.0337559	0.00448265	0.0139223	0.000147831	0.000852338	0.000943885	0.00204358
16794			level4			976.701	103.4	POS													0.00146234	7.35748e-06	7.73968e-06	5.49296e-05	6.6035e-06	6.35635e-06	0.000407454	7.65125e-06	6.63944e-06	6.73331e-06	6.40003e-06	0.00186534	7.29904e-06	0.000534876	8.25035e-05	0.000795825	6.03329e-06	0.00307163	6.99202e-06	7.01008e-06	0.000417885	7.26414e-05	0.00949166	6.43745e-05	0.00250038	6.4774e-06	6.4469e-06	5.93157e-06	6.97649e-06
16795			level4			977.705	103.4	POS													0.000819674	7.35748e-06	7.73968e-06	5.49296e-05	6.6035e-06	6.35635e-06	0.00034411	7.65125e-06	6.63944e-06	6.73331e-06	6.40003e-06	0.00116047	7.29904e-06	0.000191781	6.71202e-06	6.9597e-06	6.03329e-06	0.00159084	6.99202e-06	7.01008e-06	0.000212915	7.3684e-06	0.00490006	7.40883e-06	0.00100431	6.4774e-06	6.4469e-06	5.93157e-06	6.97649e-06
16805			level4			378.187	103.3	POS													0.0192549	0.000734258	0.00188689	0.00328762	0.00363543	6.35635e-06	0.00163894	0.0118841	0.00124921	0.0011523	0.000134948	0.00781645	0.00179425	0.00843726	0.000445119	0.0160383	7.62222e-05	0.0107861	0.00298027	0.00818865	0.00507138	0.00580249	0.0415684	0.00328214	0.0101462	0.000510804	0.0105389	0.00303337	0.00776032
16808			level4	Tezacaftor	-1.87625	521.511	103.3	POS													0.000500141	7.35748e-06	7.73968e-06	5.49296e-05	6.6035e-06	8.17471e-05	0.00112607	0.000306315	0.000140316	0.000367554	6.40003e-06	0.000489454	0.000812005	0.00281678	0.00165397	0.000331402	0.000594431	0.00231774	0.000577909	0.000384598	0.000629173	0.00086575	0.00263569	0.0009862	0.00151279	6.4774e-06	6.4469e-06	5.93157e-06	9.25482e-05
16828			level4			1147.71	103.3	POS													0.000541779	7.35748e-06	7.73968e-06	5.49296e-05	6.6035e-06	6.35635e-06	6.10878e-06	0.00012523	6.63944e-06	6.73331e-06	6.40003e-06	0.00016464	0.000508179	0.00397519	0.000430291	0.00136247	5.06151e-05	0.00331954	6.99202e-06	0.000387047	0.000549042	0.000210936	0.00345601	7.40883e-06	0.00138005	6.4774e-06	6.4469e-06	5.93157e-06	6.97649e-06
16829			level4			1148.71	103.3	POS													0.000112154	7.35748e-06	7.73968e-06	5.49296e-05	6.6035e-06	6.35635e-06	0.000114856	0.000132736	6.63944e-06	6.73331e-06	6.40003e-06	1.19552e-05	0.000153984	0.00281376	0.000151499	6.9597e-06	6.03329e-06	0.00217029	6.99202e-06	7.01008e-06	0.000289549	7.3684e-06	0.00168192	7.40883e-06	0.00078356	6.4774e-06	6.4469e-06	5.93157e-06	6.97649e-06
16849			level4			865.635	103	POS													0.0145176	6.25729e-05	7.73968e-06	5.49296e-05	0.00120885	0.00257652	0.0127669	0.00635924	0.00295025	0.00505284	6.40003e-06	0.0198987	0.011005	0.0325916	0.0186013	0.014564	0.00748979	0.0314364	0.00625207	0.00845312	0.0097928	0.00787096	0.0438866	0.00836581	0.0181136	0.000287252	0.00227149	0.00191642	0.00363752
16896			level4			735.627	102.3	POS													8.04405e-06	7.35748e-06	7.73968e-06	5.49296e-05	0.000386025	6.35635e-06	0.000638684	0.000224675	0.00113626	0.000180347	3.55533e-05	0.00154459	0.00117303	0.000871618	0.00161398	0.00535241	0.00502966	0.00037605	0.00197727	7.01008e-06	0.00103158	0.000427794	0.00418683	0.000301572	0.00163935	6.4774e-06	0.000245353	0.00305976	6.97649e-06
16904			level4			734.624	102.2	POS													0.00197126	0.000186777	7.73968e-06	5.49296e-05	0.0032979	0.000939711	0.00383854	0.00223159	0.005158	0.0017198	0.000710775	0.00741567	0.00658883	0.00446895	0.0078574	0.0232844	0.0220405	0.00419253	0.00902518	0.000946816	0.00529686	0.00322284	0.0258627	0.00227464	0.0103607	9.64386e-05	0.00228794	0.0131562	0.000481427
16932			level4	Feruloyl-CoA	-9.40614	944.701	101.7	POS													0.00380234	7.35748e-06	8.74475e-05	5.49296e-05	6.6035e-06	0.000198305	0.00245924	0.00152213	7.98536e-05	0.000531543	4.02809e-05	0.00493161	0.00273007	0.0086436	0.00434601	0.0126325	0.0016903	0.00881172	0.00105885	0.000530491	0.00270826	0.00194625	0.0256908	0.00142254	0.00557609	6.4774e-06	7.26581e-05	0.000203676	0.000518484
16942			level4			945.705	101.6	POS													0.00179421	7.35748e-06	7.73968e-06	5.49296e-05	6.11984e-05	6.35635e-06	0.00111165	0.000449325	4.34197e-05	0.000270066	6.40003e-06	0.002461	0.000901347	0.00484283	0.0019722	0.00580522	0.00115818	0.0044196	0.000455546	0.00079463	0.00133116	0.000638035	0.0126705	0.000536098	0.00234781	6.4774e-06	7.95942e-05	4.4777e-05	6.97649e-06
16966			level4	sinapoyl-CoA	10.5428	970.717	101.3	POS													0.0174948	4.87175e-05	0.000352174	5.49296e-05	0.00184777	0.00260581	0.0177608	0.0143572	0.00179351	0.00426196	4.90158e-05	0.0296683	0.0162288	0.0399418	0.0201862	0.0705898	0.00848948	0.0327606	0.00643774	0.0132399	0.0149085	0.00831406	0.122685	0.00566004	0.021728	3.82446e-05	0.00287637	0.00238317	0.00627867
16967			level4			971.721	101.3	POS													0.0104977	7.35748e-06	7.73968e-06	5.49296e-05	0.00109474	0.00153976	0.0104231	0.00785626	0.000885852	0.00232725	6.40003e-06	0.0180352	0.00985876	0.0234519	0.0121538	0.038467	0.00492813	0.0201386	0.00334147	0.00766583	0.00863709	0.00493111	0.0709567	0.00307666	0.0134798	6.4774e-06	0.00144603	0.00126609	0.00348871
16968			level4			107.858	101.2	POS													7.18162e-05	7.35748e-06	7.73968e-06	0.000721142	6.6035e-06	6.35635e-06	0.000168915	7.65125e-06	6.63944e-06	6.73331e-06	6.40003e-06	1.19552e-05	7.87957e-05	0.000812648	6.52999e-05	0.00115186	4.4525e-05	0.000498382	6.99202e-06	7.01008e-06	0.000184741	7.3684e-06	0.00243612	7.40883e-06	0.000126419	6.4774e-06	6.4469e-06	5.93157e-06	6.97649e-06
17136			level4			397.132	99.7	POS													0.000106862	0.000347502	0.000212614	5.49296e-05	0.00070582	0.000151893	0.0001545	0.000285116	4.56312e-05	0.000487315	4.23631e-05	0.00241075	0.000262953	0.000204845	6.71202e-06	0.00022458	0.00016796	0.000848373	0.000262162	0.000184998	0.000358394	0.00123876	0.016246	0.000240254	0.00121533	0.000121057	0.00661737	0.000891977	0.000160342
17195			level4			702.542	98.6	POS													0.00294254	0.000188636	0.000159111	0.000951136	0.0007618	0.00104929	0.00283335	0.00244904	0.00280233	0.0029947	0.00035841	0.00706573	0.00589649	0.0047616	0.0092795	0.029906	0.0141554	0.00701912	0.00592167	0.00224507	0.00518704	0.00488261	0.0303311	0.0028081	0.0133777	0.000402444	0.00141943	0.0104642	0.00101722
17232			level4	1D-1-Guanidino-3-amino-1,3-dideoxy-scyllo-inositol 4-phosphate	22.3959	301.22	97.7	POS													0.000971626	0.000654802	0.000579231	5.49296e-05	0.000356826	0.000389745	0.000668072	0.000404671	0.000748866	0.000415198	0.000355014	0.000910418	0.000504621	0.000819821	0.000615486	0.00186315	0.000320233	0.000507652	0.000925786	0.000511203	0.000628867	0.000820828	0.00151156	0.000454101	0.000902685	0.000291098	0.000577494	0.000452524	0.000447199
17585			level4			259.994	90.2	POS													0.000782687	0.000270878	0.000367745	5.49296e-05	0.000441478	0.000843579	0.000581549	0.000508539	0.000191855	0.00021333	0.000628318	0.00079625	0.000720851	0.000760388	0.000200843	0.000942129	0.000268527	0.0018141	0.000210656	0.000742906	0.000567077	0.00122338	0.000762388	0.000808105	0.000772639	0.00188707	0.000481673	0.0014327	0.000760805
17588			level4			301.02	90.2	POS													0.0012035	0.000428227	0.000620501	5.49296e-05	0.000658454	0.00315458	0.00099631	0.000676767	0.000533566	0.00048505	0.000945213	0.000801156	0.00138395	0.00126082	0.000429581	0.000146644	0.00040537	0.00230278	0.000524514	0.0010586	0.000903526	0.00167971	0.000891703	0.00131441	0.00109269	0.00250406	0.000415999	0.00198031	0.00092014
17616			level4			350.207	89.4	POS													0.00169919	0.00144244	0.000166668	0.00230877	0.000114981	6.35635e-06	0.000199893	0.000824698	0.00188133	0.00019636	0.000225907	0.00531866	0.00405106	0.00161385	0.00024297	0.00103559	9.28794e-05	0.00167531	0.00120574	0.00011983	0.00122112	0.000941205	0.00568894	0.000353616	0.00258478	0.000749983	0.000881723	0.000769584	0.000857041
17669			level4			813.652	89	POS													0.000197721	0.000100405	4.18055e-05	0.00142714	2.64134e-05	6.8498e-05	0.000538095	0.000164091	0.000155873	0.000148391	3.28161e-05	1.19552e-05	0.000634402	0.00134643	0.00150834	0.000857555	0.000568636	0.00184868	0.000106892	0.000281062	0.00050326	0.00033613	0.00491873	0.000239582	0.000579733	0.000188492	4.27124e-05	7.8302e-05	0.000290845
17772			level4			98.9185	86.5	POS													0.0104904	0.00951442	0.0103556	0.022345	0.0129898	0.00156857	0.01105	0.0124361	0.01372	0.00859313	0.0105572	0.0140424	0.0087911	0.00861131	0.0141067	0.00555546	0.00819268	0.00999748	0.0099918	0.00864691	0.0105778	0.0106305	0.00606947	0.00439839	0.0101991	0.0112109	0.00570565	0.0106977	0.0126566
17850			level4			82.9448	84.5	POS													0.0075705	0.0127396	0.015048	0.019463	0.0162693	0.0141315	0.0154798	0.0163935	0.0267197	0.0137473	0.014966	0.0225842	0.00914993	0.00657826	0.0052736	0.00725824	0.00478701	0.0116215	0.0157748	0.015343	0.0135449	0.00519918	0.00700078	0.0067381	0.0131311	0.00799383	0.0167286	0.012443	0.0121393
17908			level4			813.656	82.8	POS													0.000429644	7.35748e-06	7.73968e-06	5.49296e-05	6.6035e-06	0.000109769	0.000733673	8.33612e-05	0.000123934	0.000103227	6.40003e-06	0.000112083	0.000305446	0.00307214	0.00301951	6.9597e-06	0.000674195	0.00217588	0.000202304	5.51399e-05	0.000564515	0.000451944	0.00779961	0.000477962	0.00109228	3.10784e-05	4.09823e-05	5.93157e-06	6.97649e-06
18057			level4			122.043	78.9	POS													6.31197e-05	7.35748e-06	3.14985e-05	0.00594063	0.00117912	0.000140962	0.00309658	0.000967746	0.000483713	0.000631612	0.000286056	0.00183693	0.000248683	0.000156337	0.000117746	0.00373971	0.000361287	0.00169942	0.00193325	0.000375185	0.00116485	0.00742055	0.0113518	0.00448743	0.00754508	0.00253969	0.000652172	0.00104555	0.00242984
18066			level4	Azacozole	12.7387	301.152	78.9	POS													0.00509674	0.000273115	0.000507072	5.49296e-05	0.000387422	0.000139231	0.000390663	0.00277919	0.00113513	0.000586629	0.000621963	0.00497773	0.00282386	0.00183968	0.00052337	0.00762029	0.000360306	0.00443458	0.000816691	0.00170259	0.00185356	0.000584696	0.00970722	0.000684363	0.00670683	0.000912875	0.00062093	0.000254958	0.00223514
18073			level4	Oolongtheanin	-17.9861	733.591	78.9	POS													0.000627206	7.35748e-06	7.73968e-06	5.49296e-05	6.6035e-06	6.35635e-06	0.000946135	0.000117898	0.000249152	7.9272e-05	6.40003e-06	0.000224779	0.000644727	0.00463032	0.00191087	0.0013166	0.00182876	0.00258923	0.000666669	0.000264736	0.000809287	0.00104491	0.00817516	0.00043293	0.00112416	6.4774e-06	6.4469e-06	0.000502981	6.97649e-06
18079			level4			745.555	78.6	POS													0.000419319	7.35748e-06	0.000103625	5.49296e-05	6.6035e-06	6.35635e-06	0.00107333	0.000122986	0.000751099	0.000145839	6.40003e-06	0.000683119	0.000477251	0.00254593	0.000938982	0.00650265	0.00358781	0.00222214	0.0018857	0.000143917	0.00108427	0.000202936	0.00962137	0.000213915	0.00170346	6.4774e-06	6.4469e-06	0.00292621	6.97649e-06
18086			level4			754.572	78.4	POS													0.00112303	7.35748e-06	7.73968e-06	5.49296e-05	6.6035e-06	6.35635e-06	0.00265815	0.000493167	0.000788988	0.000721118	6.40003e-06	0.000695843	0.00107183	0.0065412	0.00297142	0.00662881	0.00363437	0.00381086	0.00140757	0.00107832	0.0016857	0.00192117	0.0183215	0.00130815	0.00310686	6.4774e-06	0.000171155	0.00182649	0.000223071
18087			level4			121.039	78.3	POS													0.00724653	0.00629568	0.00616231	0.207441	0.0208138	0.00851362	0.0537155	0.0210569	0.0114339	0.0110046	0.00575503	0.0426103	0.0105925	0.00788412	0.00553961	0.0642099	0.0092954	0.0298402	0.03282	0.00887949	0.0285555	0.133645	0.194474	0.0705094	0.130922	0.0401965	0.0122849	0.0166577	0.0436475
18089			level4			139.05	78.3	POS													0.0181955	0.0261839	0.017865	0.831228	0.0854638	0.0299261	0.20635	0.0793825	0.0458576	0.0424553	0.0186087	0.16134	0.0395503	0.029896	0.0183048	0.241002	0.0341154	0.110045	0.12189	0.0288558	0.109326	0.514631	0.750809	0.280902	0.504268	0.162864	0.0486391	0.0679203	0.164478
18105			level4	Degalloyltheaflavonin	-13.3523	785.624	78.3	POS													0.000119107	7.35748e-06	7.73968e-06	5.49296e-05	6.6035e-06	6.35635e-06	0.000982131	0.000137704	0.000102654	9.62212e-05	6.40003e-06	0.000176186	0.000296241	0.00813706	0.001579	0.00266621	0.00113385	0.00136351	0.000707855	0.000178165	0.000888263	0.000515255	0.0238401	0.000773534	0.00143392	6.4774e-06	6.4469e-06	0.000338093	6.97649e-06
18106			level4	2'',3'',6''-Tris-O-(3,4,5-trihydroxybenzoyl)-3'-Glucosyl-2',4',6'-trihydroxyacetophenone	-6.32672	787.602	78.3	POS													0.000402474	0.000233611	4.87008e-05	5.49296e-05	8.39667e-05	0.000257638	0.001366	0.000616564	0.000765677	0.00055893	6.40003e-06	0.00398239	0.00139252	0.00448553	0.0020182	0.0228188	0.00447227	0.00229119	0.00490578	7.19523e-05	0.00254167	0.000256729	0.0300731	0.000446998	0.00336166	6.4774e-06	0.000625827	0.00260814	0.00039866
18107			level4			811.64	78.3	POS													0.000134728	7.35748e-06	7.73968e-06	5.49296e-05	6.6035e-06	0.000110465	0.00163002	8.76696e-05	0.000377022	0.000284637	6.40003e-06	1.19552e-05	0.000789596	0.00286513	0.00330034	0.000433511	0.000863719	0.00139102	0.00116359	9.61606e-05	0.00068113	0.000770095	0.0138041	0.000325596	0.00112666	6.4774e-06	4.45713e-05	0.000284289	6.97649e-06
18116			level4			789.618	78.2	POS													0.000450712	9.61734e-05	7.73968e-06	5.49296e-05	6.6035e-06	6.35635e-06	0.000759658	0.000430367	0.000741309	0.000186056	7.58041e-05	0.000374919	0.00138117	0.00328043	0.00227538	0.0152103	0.0052621	0.00296647	0.00249609	0.000303521	0.0018183	0.000989722	0.0229173	0.000376836	0.00232022	6.4774e-06	0.000186642	0.00177397	6.96931e-05
18123			level4			735.572	77.9	POS													0.00117421	7.35748e-06	0.00028163	5.49296e-05	9.65509e-05	6.35635e-06	0.00208591	0.000788161	0.00108236	0.00039257	9.80097e-05	0.00207959	0.00128584	0.00403668	0.00224892	0.0149442	0.00214696	0.00257517	0.00158174	0.000458899	0.0018713	0.00160825	0.0605822	0.00148798	0.00210646	6.4774e-06	9.86301e-05	0.00488722	0.000284238
18159			level4			810.636	77.6	POS													0.00108884	7.35748e-06	7.73968e-06	5.49296e-05	6.6035e-06	0.000213074	0.00798321	0.00091944	0.000686275	0.000749607	6.40003e-06	0.000867252	0.0017063	0.00679898	0.00672443	0.00369574	0.00171175	0.000798365	0.00256457	0.0012706	0.00189307	0.00159545	0.0282967	0.000753339	0.00268174	5.47554e-05	4.21325e-05	0.000613231	5.87531e-05
18175			level4			730.573	76.9	POS													0.0110421	0.000289228	0.00116827	0.00286654	0.00289484	0.00398342	0.0165741	0.0066229	0.00719727	0.00723389	0.000409444	0.00781833	0.0143245	0.0617718	0.029503	0.0269633	0.0355899	0.0244353	0.0139781	0.00882583	0.0141746	0.0146862	0.094993	0.0115667	0.018004	0.00167023	0.00221907	0.0152286	0.00323387
18195			level4			702.542	76.9	POS													0.00490813	0.000815486	0.000908615	0.00103405	0.00301049	0.00264194	0.0127756	0.00622889	0.010429	0.00652574	0.000980679	0.0118912	0.00995401	0.0255624	0.0154951	0.0730215	0.0476133	0.0141379	0.0119126	0.00449638	0.0132172	0.0173804	0.181649	0.00721106	0.020605	0.00161839	0.00250522	0.0167746	0.00269647
18196			level4			703.545	76.9	POS													0.00172365	7.35748e-06	5.23821e-05	5.49296e-05	0.00129122	0.000918354	0.00448352	0.00194775	0.00407262	0.0020838	6.40003e-06	0.0020019	0.00378284	0.0118703	0.00774752	0.00808585	0.0200616	0.00462942	0.00490817	0.00151931	0.00406244	0.00540378	0.0267663	0.00303655	0.00960848	0.000270513	0.000870629	0.00943028	0.000329356
18197			level4			704.556	76.9	POS													0.0013815	7.35748e-06	7.73968e-06	5.49296e-05	0.000520691	6.35635e-06	0.00220083	0.000467686	0.00172723	0.000723793	6.40003e-06	0.000988812	0.00230823	0.00571393	0.00367933	0.0128624	0.0155594	0.00451532	0.00305009	0.000480205	0.00281311	0.00486774	0.017334	0.00108401	0.00462107	6.16745e-05	0.000110807	0.00376989	6.97649e-06
18209			level4			747.571	76.9	POS													0.00392045	7.35748e-06	0.00014678	0.000985336	0.000878871	0.00171913	0.00794262	0.00359715	0.00295349	0.00301491	6.40003e-06	0.00235008	0.00504679	0.0258088	0.0100565	0.0180519	0.0106256	0.0133043	0.00503921	0.0035092	0.00594825	0.00453206	0.0807378	0.00402438	0.0103818	0.000617235	0.000681835	0.00741933	0.00193703
18687			level4			144.032	62	POS													0.00129034	0.00103224	0.000755075	0.00711541	0.00106939	0.000810192	0.0155594	0.00112345	0.00075213	0.000860411	0.000985795	0.00191709	0.0126281	0.00154145	0.00473126	0.000905189	0.000885917	0.00135613	0.0174763	0.00111559	0.00369554	0.00108669	0.00185386	0.000988465	0.000879878	0.0015252	0.00104831	0.000945896	0.000777156
18722			level4			170.969	60.4	POS													0.000682073	0.000772616	0.00134643	0.00390836	0.000537966	0.000719979	0.0167939	0.000492713	0.000292443	0.000270542	0.000431206	0.00175836	0.0150311	0.00033777	0.00515555	0.000554031	0.00113284	0.000901525	0.0163631	0.000464888	0.00339737	0.000791516	0.000615122	0.000796632	0.000335108	0.00069074	0.000238947	0.000398381	0.000566987
18750			level4			836.649	59.5	POS													0.000235496	7.35748e-06	4.20602e-05	5.49296e-05	6.6035e-06	6.35635e-06	0.000905179	7.65125e-06	6.63944e-06	0.000380826	6.40003e-06	0.000804462	0.000336815	0.00361126	0.00162012	0.00156687	0.000652307	0.0029437	0.000822936	0.000144428	0.00070812	0.000717341	0.0192398	0.0003284	0.00129487	6.4774e-06	6.4469e-06	5.23641e-05	6.97649e-06
18798			level4	2-Methylhexanoyl-CoA	0.367624	880.712	57.6	POS													8.04405e-06	7.35748e-06	7.73968e-06	5.49296e-05	6.6035e-06	6.35635e-06	0.000552913	5.41118e-05	6.63944e-06	6.73331e-06	6.40003e-06	0.000186295	7.74691e-05	0.00248635	0.000549459	0.00467572	0.000265486	0.00120607	6.99202e-06	7.01008e-06	0.000508934	6.82418e-05	0.0188552	7.2651e-05	0.000288431	6.4774e-06	6.4469e-06	5.93157e-06	6.97649e-06
18807			level4	Flurbiprofen	-7.68277	245.266	57.1	POS													0.00613431	0.0029444	0.00116987	0.039158	0.00108862	0.0053212	0.0050568	0.00220902	0.00607678	0.00351418	0.00108017	0.00541708	0.00354308	7.27281e-06	0.00325802	6.9597e-06	0.00250376	0.0023507	0.00334141	0.00287731	0.00485295	7.3684e-06	0.00235638	0.00469484	6.82087e-06	6.4774e-06	6.4469e-06	0.000954057	6.97649e-06
18833			level4	Thio-NAD	21.8155	680.512	56.3	POS													0.000565438	6.75016e-05	5.49039e-05	5.49296e-05	0.000114636	6.45192e-05	0.000214374	0.000150581	0.00126933	0.000788201	0.000155611	1.19552e-05	0.0022098	0.0022004	0.00141045	0.00667018	0.000742984	0.00138027	0.000593158	4.42157e-05	0.000938172	0.000283775	0.0135959	0.000222498	0.00088878	0.000273347	6.4469e-06	0.0020118	3.76653e-05
18848			level4	Norbadione A	-9.69273	679.509	55.8	POS													0.0095951	4.6443e-05	3.56435e-05	0.00137133	2.66103e-05	0.00206183	0.00250385	0.000303109	0.003534	0.00213307	6.40003e-06	0.000860286	0.0121986	0.0127678	0.00745482	0.0429408	0.00499196	0.0153132	0.00561104	9.80926e-05	0.0061927	0.00400878	0.067487	0.001304	0.00347245	0.0011696	0.000614543	0.0110258	9.83943e-05
18868			level4			693.522	54.9	POS													0.00166902	7.35748e-06	7.73968e-06	5.49296e-05	0.000117183	0.00146812	0.00087659	0.000220267	0.00442048	0.00136324	6.40003e-06	0.000793237	0.00309554	0.00424411	0.00268156	0.0105621	0.00244876	0.00319565	0.00429889	0.000120429	0.00208258	0.00262548	0.0277938	0.000275337	0.00205342	0.000127779	0.000189157	0.00292613	6.97649e-06
18900			level4	Amoscanate	-10.972	272.294	53.2	POS													0.0085838	0.00747344	0.00275272	0.0724076	0.00212042	0.00712526	0.00938426	0.00461573	0.0103182	0.00673532	0.00231362	0.0157945	0.00568783	6.84667e-05	0.0067608	0.00141513	0.00519514	0.00518242	0.00746419	0.0059778	0.00936883	0.000301448	0.00400566	0.00960127	4.76628e-05	4.36231e-05	0.000165471	0.00161088	3.75135e-05
18939			level4	(6-Aminoquinolin-2-yl) N-(2,5-dihydroxypyrrol-1-yl)-N-hydroxycarbamate	22.5229	317.287	52.2	POS													0.000368946	0.000289061	7.73968e-06	0.00266701	0.000460641	0.000269082	0.00463635	0.00139728	0.00175631	0.000634451	7.5913e-05	0.00345698	0.00306036	0.000830155	0.00050841	0.00645488	0.00255001	0.000692251	0.00175111	6.06135e-05	0.00159638	0.00531786	0.00516876	0.000734956	0.0032023	0.000205562	0.00188608	0.00269288	4.98882e-05
18994			level4			481.325	51	POS													0.00301308	0.0058835	0.00731519	0.0263975	0.00361658	0.00590673	0.00711173	0.00585352	0.00728458	0.00450077	0.00513261	0.00767324	0.00527987	0.00389872	0.00406287	0.00021856	0.00327812	0.00307098	0.00471838	0.00428924	0.00592529	0.00363711	0.000410704	0.00505231	0.00395367	0.00409235	0.00661561	0.0036318	0.0055917
19003			level4			745.555	50.9	POS													0.0212314	0.00860528	0.00634101	0.100558	0.00457462	0.00512557	0.0243143	0.0257314	0.0332744	0.0240586	0.00258669	0.100508	0.0262202	0.0841949	0.0328506	0.215254	0.0674795	0.0796073	0.0877856	0.0193569	0.0484829	0.0408656	0.455653	0.0258327	0.0368927	0.00354564	0.0124739	0.0615829	0.00636002
19011			level4			1011.73	50.6	POS													8.04405e-06	7.35748e-06	7.1559e-05	5.49296e-05	6.6035e-06	6.35635e-06	6.10878e-06	7.65125e-06	6.63944e-06	7.06753e-05	6.40003e-06	1.19552e-05	7.29904e-06	0.000134272	0.000181434	0.000373181	0.00013175	6.81434e-06	8.14315e-05	7.01008e-06	5.93736e-05	7.3684e-06	0.000411429	7.40883e-06	0.000298846	6.4774e-06	7.47097e-05	8.99209e-05	6.97649e-06
19017			level4			401.763	50.2	POS													0.00480495	0.00308496	0.00295335	0.0518895	0.00198163	0.0168323	0.0733526	0.013774	0.0044137	0.00312249	0.00168491	0.0023217	0.0137183	0.00866405	0.0145305	0.000374831	0.00191059	0.00149132	0.0054815	0.0031155	0.0114751	0.0017414	0.00158984	0.000135328	0.0032766	0.000377775	0.00233119	0.0013953	0.0018639
19019			level4			401.261	50.1	POS													0.0128767	0.0064411	0.00828559	0.132587	0.0064999	0.0496956	0.196289	0.0462225	0.0165323	0.00722576	0.00406755	0.00897114	0.0258269	0.0219067	0.0371373	0.000564233	0.0046084	0.0117166	0.0129644	0.0157639	0.0313091	0.0115404	0.00655286	0.00129325	0.00896723	0.00175531	0.0126324	0.00431867	0.0101764
19057			level4			457.022	48.8	POS													0.0143569	0.0192354	0.0278688	0.0266146	0.0453752	0.0189212	0.0257654	0.0168369	0.023243	0.0125042	0.0341435	0.0653321	0.0319137	0.00512554	0.016174	6.9597e-06	0.00684733	0.00459984	0.01031	0.0150447	0.021011	0.0186771	9.43177e-06	0.0203106	0.00337741	0.000942717	0.0106519	0.0113208	0.0107371
19112			level4			882.614	47.5	POS													0.00044987	7.35748e-06	7.73968e-06	5.49296e-05	0.000202491	0.000583902	0.00245435	0.00125275	0.00607008	0.00130422	7.08745e-05	0.00156726	0.00366592	0.00494499	0.00269699	0.00329047	0.00032514	0.000783886	0.00738788	7.01008e-06	0.00185641	0.0132662	0.0399222	8.45837e-05	0.00928576	6.4774e-06	6.4469e-06	0.0123515	6.97649e-06
19120			level4			936.658	47.2	POS													0.000927456	7.35748e-06	7.73968e-06	5.49296e-05	0.000106251	0.00161418	0.00490432	0.0020537	0.0030711	0.00572913	6.40003e-06	0.00522409	0.00426143	0.0105207	0.0042777	0.0254792	0.0040149	0.00850731	0.0054857	0.00010465	0.00431792	0.0095946	0.0699692	0.000657605	0.00784739	0.000403138	0.000428463	0.0156919	6.97649e-06
19144			level4	2-Oxoglutaryl-CoA	5.72053	896.629	46.7	POS													0.000440658	7.35748e-06	7.73968e-06	0.000667106	0.000145677	0.000601241	0.00404791	0.00201621	0.00563977	0.000929589	6.6803e-05	0.0026048	0.00166349	0.00285927	0.00173316	0.0012862	0.000277984	0.00154498	0.0064098	7.01008e-06	0.00164784	0.0127003	0.0256169	7.40883e-06	0.00542676	7.87995e-05	8.29254e-05	0.0117639	9.38343e-05
19154			level4	Edta oxalate	-13.9502	379.248	46.4	POS													0.0225111	0.00787434	0.0158581	0.192377	0.0102471	0.0667233	0.122034	0.046001	0.0183956	0.01369	0.00937373	0.00386784	0.0267658	0.0322863	0.039522	0.000713008	0.0101543	0.012142	0.0141134	0.0191602	0.0341905	0.0189438	0.012745	0.00155361	0.0142826	0.00295635	0.0218128	0.00332161	0.010069
19167			level4			379.75	45.9	POS													0.00730128	0.00431276	0.0059144	0.0545314	0.00368429	0.0224344	0.0459874	0.0172801	0.00739735	0.0046034	0.00335847	0.00113628	0.0122037	0.0104187	0.0113345	6.9597e-06	0.000593327	0.00542991	0.00504157	0.00744444	0.0115207	0.00657317	0.00366715	0.000290752	0.00495121	0.000679316	0.00714083	0.00175464	0.00453856
19168			level4			897.633	45.9	POS													8.04405e-06	7.35748e-06	7.73968e-06	5.49296e-05	6.6035e-06	0.000100611	0.00166762	0.000519169	0.00272239	0.000139402	6.40003e-06	0.000479714	0.000539221	0.000611883	0.000297424	0.000372564	0.000122202	0.000417745	0.0030024	8.08856e-05	0.000558215	0.00613865	0.0118829	0.000163001	0.00440102	6.4774e-06	0.000106943	0.00604	6.97649e-06
19188			level4			843.665	45.6	POS													0.000148129	7.35748e-06	7.73968e-06	5.49296e-05	6.6035e-06	6.35635e-06	0.00019805	7.65125e-06	6.63944e-06	6.73331e-06	6.40003e-06	0.000168236	7.29904e-06	0.00104234	0.000690988	0.00327278	0.000491567	0.00131349	6.99202e-06	7.01008e-06	0.000372864	7.3684e-06	0.0193135	7.40883e-06	0.00039747	6.4774e-06	6.4469e-06	0.000175501	6.97649e-06
19202			level4			761.496	45.3	POS													0.000659374	7.35748e-06	0.000180736	5.49296e-05	6.37055e-05	9.30678e-05	0.000216491	7.65125e-06	8.30015e-05	6.73331e-06	6.40003e-06	1.19552e-05	0.000119865	0.00039252	6.71202e-06	0.00466053	0.000214491	0.00120564	0.000274001	0.000448935	0.000435705	0.000203659	0.0175879	0.0005778	0.000522276	0.000180911	8.18295e-05	0.000282096	0.000156626
19221			level4			473.198	44.8	POS													0.00084322	7.35748e-06	7.73968e-06	0.00126857	0.00292502	0.000710373	0.000587204	0.000715967	0.00128889	0.0017939	0.00053156	0.00154426	0.00548019	0.000511205	0.000565896	6.9597e-06	7.78147e-05	0.000162486	6.99202e-06	0.000292304	0.000966395	7.3684e-06	9.43177e-06	8.36421e-05	6.82087e-06	6.90571e-05	6.56265e-05	0.00265119	0.00150601
19260			level4			284.144	44.2	POS													0.00242287	0.0034985	0.00367768	0.0156077	0.00317208	0.00414701	0.0026063	0.00250133	0.00294533	0.00223718	0.00292408	0.00538739	0.00122157	0.000881598	0.00113582	6.9597e-06	0.00117723	0.000961067	0.00181712	0.00279641	0.00305626	0.0018617	9.43177e-06	0.0025989	0.00136368	0.00233031	0.00218318	0.000915991	0.00320366
19266			level4	9-[2-(Phosphanylmethoxy)ethyl]purin-6-amine	-22.0994	226.194	44.1	POS													0.00337355	0.00565855	0.00452196	0.0270133	0.00255252	0.00308043	0.00430317	0.00255957	0.00420531	0.00333758	0.00287424	0.00549902	0.00352	0.00341592	0.00308887	0.378152	0.00243468	0.00279551	0.00321834	0.00303599	0.023432	0.00307383	0.431668	0.00203753	0.0033953	0.00356915	0.00351072	0.00227753	0.00310392
19282			level4			763.596	43.9	POS													0.0101523	0.000702844	0.0011157	0.00437986	0.00134894	0.00305418	0.0114824	0.00703244	0.00626595	0.00732895	0.000235583	0.0301977	0.00798603	0.0318624	0.0265121	0.200594	0.0260465	0.0361271	0.0185092	0.00440896	0.0217672	0.0128134	0.342492	0.0112525	0.0211298	0.000444922	0.00554758	0.0211092	0.00332666
19287			level4	5,10-Methenyltetrahydromethanopterin	19.8346	788.708	43.8	POS													8.04405e-06	7.35748e-06	7.73968e-06	5.49296e-05	6.6035e-06	6.35635e-06	5.69614e-05	7.65125e-06	6.63944e-06	6.73331e-06	6.40003e-06	0.000185205	7.29904e-06	0.00101128	0.000487734	0.00363258	0.00130658	0.000564258	0.000124998	7.01008e-06	0.000375118	4.63907e-05	0.0101822	0.000106394	0.000561679	6.4774e-06	6.4469e-06	8.2587e-05	6.97649e-06
19291			level4			730.535	43.7	POS													0.0031243	0.00180232	0.00171408	0.00715328	0.000209806	0.00153573	0.0017435	0.0025207	0.0129704	0.00313359	0.00139347	0.00979101	0.00754998	0.00209172	0.00178451	0.0461484	0.00537563	0.00157873	0.00747611	0.00154201	0.00603196	0.0116061	0.0858333	0.00120379	0.0135575	0.00123843	0.00218939	0.0104822	0.000919067
19293			level4			760.491	43.7	POS													0.00153099	0.000233957	7.73968e-06	0.00104813	0.00023535	0.00017058	0.000243233	7.65125e-06	0.000502693	0.000322592	0.00059588	0.000232002	7.29904e-06	0.00117549	0.000359668	0.0309097	0.000675138	0.00248704	0.00067497	0.00011241	0.00207663	0.000674667	0.0438176	0.000485714	0.00326471	0.000561017	6.4469e-06	0.0016341	6.97649e-06
19301			level4			81.3952	43.4	POS													8.04405e-06	7.35748e-06	4.37405e-05	5.49296e-05	2.62207e-05	6.35635e-06	4.50238e-05	0.000107808	0.000388972	0.000152639	6.40003e-06	0.00192359	0.00046484	0.000838785	0.000574938	0.022419	0.00334714	0.000694633	0.00203886	4.72796e-05	0.00165983	0.00262752	0.0300593	5.15913e-05	0.00305207	6.4774e-06	7.39101e-05	0.00256006	6.97649e-06
19303			level4			87.6244	43.3	POS													0.00115689	7.35748e-06	7.73968e-06	5.49296e-05	6.6035e-06	6.35635e-06	0.00302651	0.00050561	0.00170454	0.000341861	6.96645e-05	0.00586281	0.00472727	0.0173901	0.00809911	0.0783119	0.0149264	0.0101172	0.0083952	0.000100492	0.00774093	0.0015975	0.135681	0.00126059	0.00756795	6.4774e-06	0.000343847	0.00514626	0.000152412
19305			level4			791.624	43.3	POS													0.000812735	7.35748e-06	7.73968e-06	5.49296e-05	6.6035e-06	6.35635e-06	0.00148592	0.000370453	0.00138705	0.00113564	6.40003e-06	0.00781484	0.00220644	0.0134691	0.00459773	0.0581856	0.00589687	0.00875604	0.00465979	0.00028498	0.00555763	0.00227554	0.0981858	0.00119814	0.00553306	6.4774e-06	0.000331062	0.00461559	0.000232492
19310			level4			87.7359	43	POS													0.000343954	7.35748e-06	7.73968e-06	5.49296e-05	6.6035e-06	6.35635e-06	0.0013087	7.65125e-06	0.000308983	0.000243646	6.40003e-06	0.00402056	0.00156802	0.00706962	0.00350769	0.0361087	0.00660517	0.00443201	0.00399309	3.87573e-05	0.0034823	0.000599944	0.0627003	0.000324662	0.00380886	6.4774e-06	6.05017e-05	0.00222376	0.000127252
19317			level4			762.591	43	POS													0.0385969	0.00895667	0.00817862	0.0481882	0.00808892	0.012054	0.0290564	0.0283123	0.0278827	0.0275254	0.00473192	0.148878	0.0488705	0.179929	0.105398	0.833003	0.132661	0.114609	0.0977656	0.0136446	0.0958165	0.0650932	1.53349	0.0341101	0.140199	0.00490002	0.0296462	0.0748669	0.0130569
19319			level4			789.618	43	POS													0.0396371	0.00571755	0.00486315	0.0374473	0.00850168	0.0177967	0.0543616	0.0329354	0.0382641	0.0324777	0.00382069	0.186977	0.0927988	0.253244	0.144715	1.05601	0.229229	0.20049	0.150809	0.023531	0.130681	0.0597964	1.92054	0.0465121	0.143507	0.00521839	0.026913	0.0618434	0.0132525
19322			level4			84.5098	42.9	POS													0.00617313	0.000884598	0.000788751	0.00203413	0.000976919	0.00206691	0.0101953	0.00377607	0.00655492	0.0069887	0.000200345	0.0438771	0.0178579	0.0467843	0.0197555	0.276397	0.0440533	0.0313947	0.0294408	0.00342173	0.0276811	0.0155131	0.418866	0.0089976	0.0441631	0.000879715	0.00617932	0.0221654	0.00240992
19325			level4			761.587	42.9	POS													0.101433	0.0284207	0.0310993	0.203285	0.0271718	0.0441359	0.13966	0.0952167	0.103676	0.104518	0.018214	0.379972	0.185833	0.533533	0.24614	2.88714	0.499685	0.358396	0.363112	0.0483009	0.319947	0.237211	4.38355	0.153902	0.520126	0.0252483	0.112025	0.25742	0.0501155
19331			level4			84.6213	42.6	POS													0.00257082	0.000212975	7.75311e-05	5.49296e-05	0.000213337	0.000629141	0.0040731	0.00201519	0.00286958	0.00279664	6.40003e-06	0.0135924	0.00732542	0.0189993	0.011353	0.124511	0.0178279	0.012858	0.0124507	0.000806475	0.0117622	0.00667164	0.194737	0.00378112	0.0148848	9.28228e-05	0.00279776	0.00951612	0.000991041
19332			level4			84.7327	42.5	POS													0.000241327	7.35748e-06	7.73968e-06	0.000514932	3.80087e-05	6.35635e-06	0.000273529	0.000148239	0.000179409	0.000209035	6.40003e-06	0.002529	0.000792857	0.00282656	0.00116991	0.0239044	0.00183077	0.00203766	0.00196908	7.01008e-06	0.00193498	0.000594531	0.0328082	0.000214115	0.00246132	6.4774e-06	0.000210875	0.00111462	6.97649e-06
19341			level4			795.569	42.3	POS													0.00770567	0.00157142	0.000839064	5.49296e-05	0.00125552	0.00289444	0.00146523	0.00563303	0.00326134	0.00182213	0.000811108	0.0073443	0.00390429	0.0038822	0.00281459	0.0137657	0.00582717	0.00290245	0.00851478	0.0048986	0.00405839	0.0127542	0.0273121	0.00847677	0.00393136	0.000932168	0.00155905	0.00195907	0.00201091
19367			level4	Luteolin 7-O-[beta-D-glucuronosyl-(1->2)-beta-D-glucuronide]-4'-O-beta-D-glucuronide	21.6342	815.634	41.5	POS													0.00316293	9.84956e-05	9.73459e-05	5.49296e-05	0.000625426	0.00169843	0.00293713	0.0037159	0.0039357	0.00371927	6.40003e-06	0.0232206	0.0112176	0.0290725	0.0109417	0.108561	0.0121726	0.0228868	0.00887998	0.00185385	0.0124429	0.0049915	0.272234	0.00517937	0.0212008	0.000108859	0.00242432	0.008052	0.00222558
19410			level4			840.644	40.6	POS													0.000680668	6.75043e-05	7.73968e-06	0.00150828	8.46207e-05	0.00016602	0.00120275	0.000185968	0.000242406	0.000123182	6.40003e-06	0.00378662	0.0019662	0.00366545	0.00176507	0.0320585	0.0022231	0.00602427	0.00405571	0.000400951	0.00301107	0.000579102	0.062054	0.000401818	0.00268267	6.4774e-06	8.2044e-05	0.00287705	7.1471e-05
19434			level4	Cyclohexane-1-carboxyl-CoA	2.41931	878.697	40.3	POS													0.00339383	7.35748e-06	7.73968e-06	5.49296e-05	6.6035e-06	0.000816973	0.00451102	0.00135278	0.000714624	0.00159673	6.09147e-05	0.0100904	0.00564462	0.027818	0.0111471	0.0483397	0.00499185	0.023502	0.00298184	0.000606432	0.00738227	0.00740085	0.102492	0.00381781	0.0117401	6.4774e-06	0.000695366	0.000280885	0.000230886
19444			level4			779.576	40.2	POS													0.0126555	0.00240177	0.0015922	0.00576386	0.00225894	0.00429448	0.0218515	0.00951315	0.00801327	0.00970649	0.000387701	0.0289504	0.00975731	0.0350009	0.0169802	0.0762171	0.0149439	0.027125	0.0128963	0.0105455	0.0155428	0.0160535	0.137257	0.0135381	0.0272276	0.000688339	0.00368185	0.0164814	0.00366861
19450			level4			205.039	40.1	POS													0.000402969	0.000701579	0.00119674	0.00318332	0.00203972	0.00061472	0.000546101	0.000618563	0.000938406	0.000996052	0.00153689	0.00296124	0.000554746	0.000710338	0.000498509	6.9597e-06	0.000653981	0.000252978	0.000541749	0.00130102	0.00101283	0.000732618	9.43177e-06	0.00117673	0.000650062	8.4911e-05	0.00137445	0.000587464	0.00101794
19461			level4			879.701	40	POS													0.000711589	7.35748e-06	7.73968e-06	5.49296e-05	6.6035e-06	6.35635e-06	0.00328798	0.000212375	7.19627e-05	0.000215391	6.40003e-06	0.00841068	0.00243121	0.0120864	0.00567881	0.0283178	0.00279853	0.01217	0.00111388	8.79194e-05	0.0038842	0.00251895	0.0616575	0.00131697	0.00655397	6.4774e-06	6.4469e-06	5.93157e-06	6.97649e-06
19524			level4	6-Hydroxy flavin adenine dinucleotide	18.2439	802.571	39.2	POS													0.00139732	7.35748e-06	7.73968e-06	5.49296e-05	6.6035e-06	6.35635e-06	0.00751004	0.000612944	0.000651586	0.000919681	6.40003e-06	0.00240407	0.00106482	0.00430522	0.00101042	0.00636201	0.00207336	0.00132044	0.000330018	0.00172962	0.00158905	0.0023356	0.0175419	0.00116316	0.00188302	6.4774e-06	0.000168752	0.00143708	6.97649e-06
19545			level4			783.572	39.1	POS													0.032432	0.020957	0.0172151	0.113521	0.0070141	0.0166226	0.0294392	0.0324139	0.0234729	0.0857998	0.015252	0.217741	0.0504422	0.0846233	0.0517072	0.0518625	0.0825037	0.0516224	0.12248	0.0155212	0.0561322	0.0361893	0.573055	0.0235284	0.162835	0.00671084	0.0508235	0.0564058	0.0231856
19547			level4			805.593	39.1	POS													0.00133143	0.00135229	0.00120602	5.49296e-05	8.43452e-05	0.000111811	0.00321847	0.00125542	0.000825064	0.000913967	0.00117853	0.00403703	0.00135959	0.0033875	0.00259313	0.0156906	0.00183446	0.00190003	0.00576301	0.00140531	0.00247515	0.00183167	0.0261391	0.00109349	0.00207502	9.98816e-05	0.00309559	0.00234818	0.00077724
19550			level4			904.713	39.1	POS													8.04405e-06	7.35748e-06	7.73968e-06	5.49296e-05	6.6035e-06	6.35635e-06	9.8344e-05	7.65125e-06	6.63944e-06	7.51337e-05	6.40003e-06	0.0014492	7.29904e-06	0.00062064	0.00016123	0.00854942	0.000286974	0.00195281	0.000105574	7.01008e-06	0.000671268	7.3684e-06	0.0309048	0.00024499	0.00116094	6.4774e-06	6.4469e-06	0.00205083	6.97649e-06
19559			level4			89.9546	38.9	POS													8.04405e-06	0.000676922	7.73968e-06	5.49296e-05	0.00126173	6.35635e-06	6.10878e-06	0.000259458	6.63944e-06	6.73331e-06	5.28304e-05	0.000715806	8.69298e-05	0.000809661	6.71202e-06	0.00247669	0.000132032	6.81434e-06	0.00115473	7.01008e-06	0.000387194	7.3684e-06	0.00380556	7.40883e-06	0.000640983	6.4774e-06	6.4469e-06	0.000255621	6.97649e-06
19579			level4			86.2847	38.6	POS													8.66569e-05	7.35748e-06	7.73968e-06	5.49296e-05	6.6035e-06	6.35635e-06	0.000657913	4.19257e-05	6.63944e-06	0.000259024	6.40003e-06	0.00145739	6.96394e-05	0.00141784	0.000915583	0.00329598	0.000574897	0.000535898	6.6353e-05	9.57207e-05	0.000478542	0.000299917	0.00727761	5.5858e-05	0.000759124	6.4774e-06	6.4469e-06	0.000269931	6.97649e-06
19639			level4			222.021	37.7	POS													0.000766844	0.00173928	0.00203676	0.00488649	0.00184569	0.00350342	0.0012219	0.00162705	0.001442	0.00119901	0.00155691	0.00151876	0.00134185	0.00290373	0.000747449	6.9597e-06	0.000882571	0.00160061	0.00140936	0.00181658	0.00170266	0.00338331	0.00638751	0.00179385	0.0061324	0.000837038	0.00143654	0.000419672	0.00238313
19658			level4			831.569	37.5	POS													0.000610666	7.35748e-06	7.73968e-06	5.49296e-05	6.6035e-06	0.000115974	0.0002248	7.65125e-06	0.000287725	0.000266696	0.000154198	0.00116031	0.00015756	0.000766595	0.000809373	0.00238444	0.000106499	6.81434e-06	0.00325354	0.000300443	0.000534496	7.3684e-06	0.00725532	0.00015611	0.00169052	0.000762427	0.00050085	0.000721045	6.97649e-06
19764			level4			323.144	36	POS													0.00575727	0.00230169	0.0156852	0.00868309	0.00983632	0.00170797	0.00362294	0.00737897	0.00293966	0.00155154	0.00119423	0.00169902	0.00551338	0.0148498	0.000864286	0.00439564	0.00264847	0.019305	0.00464038	0.0108122	0.00626935	0.00812875	0.00795669	0.00791009	0.00698916	0.00125729	0.0102204	0.00653318	0.00371183
20117			level4	Tazobactam	-19.9027	301.292	32.6	POS													0.000517166	0.000941968	7.73968e-06	0.00286088	6.6035e-06	0.00131259	0.00895894	0.00340998	0.00409643	0.00201253	0.000803931	0.0143939	0.0123029	0.00446163	0.00509732	0.0506122	0.013711	0.0109626	0.00539995	0.00102189	0.00714461	0.0204258	0.0466935	0.00285785	0.0065672	6.4774e-06	0.00429667	0.00934266	6.97649e-06
20140			level4	Flunoxaprofen isocyanate	2.20849	283.282	32.4	POS													0.0010239	0.000210898	7.73968e-06	5.49296e-05	6.6035e-06	6.35635e-06	0.00443273	0.00215335	0.0013669	6.73331e-06	6.40003e-06	0.00746251	0.00608372	0.0032618	0.00117226	0.0256079	0.00625814	0.00595467	0.00294188	7.01008e-06	0.00340132	0.0113457	0.024561	0.00158438	0.00340459	6.4774e-06	0.00147453	0.00190971	6.97649e-06
20218			level4	4-coumaroyl-4'-hydroxyphenyllactate	0.0714912	328.32	31.2	POS													0.000586249	7.35748e-06	7.73968e-06	5.49296e-05	0.000234982	0.000247225	0.00492304	0.00207606	0.00101821	6.73331e-06	0.000400828	0.00444297	0.00359671	0.00194357	0.00101547	0.0120019	0.00354082	0.00291371	0.00295263	7.01008e-06	0.00209891	0.00519419	0.0202389	0.00119956	0.00176633	6.4774e-06	0.00161861	0.00550959	6.97649e-06
20348			level4			897.772	30.1	POS													8.04405e-06	7.35748e-06	7.73968e-06	0.0591197	6.6035e-06	6.35635e-06	0.00819784	0.000300922	0.0120164	0.0376028	6.40003e-06	0.000327578	0.000296577	0.0356195	0.0173371	6.9597e-06	0.000824749	0.0125498	0.0396696	7.01008e-06	0.0111959	0.0208506	0.0162598	0.000155253	0.00022048	0.00142438	6.4469e-06	0.0675712	6.97649e-06
20417			level4			896.768	29.8	POS													8.04405e-06	7.35748e-06	7.73968e-06	0.104192	6.6035e-06	6.35635e-06	0.013887	7.65125e-06	0.0256524	0.0357867	6.40003e-06	0.00120356	0.00168349	0.0829413	0.0298424	0.000764055	0.00149536	0.0202712	0.0672163	7.01008e-06	0.0192496	0.024947	0.0200222	0.00160972	0.00275472	0.0034637	0.0022171	0.139501	6.97649e-06
20443			level4			810.679	29.6	POS													0.00207391	7.35748e-06	7.73968e-06	5.49296e-05	6.6035e-06	6.35635e-06	0.00229076	7.65125e-06	0.00110124	0.000493215	6.40003e-06	0.00518091	0.00826469	0.0084358	0.00710183	0.00303534	0.00147583	0.0173705	0.00183878	0.000753946	0.00297569	0.00158132	0.0272347	0.00306843	0.00368959	6.4774e-06	6.4469e-06	0.000848188	0.000610398
20478			level4	M1G-dR	-4.8688	304.284	29.1	POS													0.0492329	0.0519329	0.0686298	0.645888	0.0468542	0.0572218	0.0278522	0.0262505	0.0549414	0.0521258	0.0831929	0.130668	0.0416374	0.00582916	0.0474787	0.00478453	0.032948	0.0025213	0.0302949	0.0320677	0.0746176	0.00560338	0.00814002	0.0610635	0.0045721	0.00550782	0.00396155	0.00291225	0.00354353
20551			level4	Mag-fura-2-acetoxymethyl ester	-22.111	723.556	28.7	POS													8.04405e-06	7.35748e-06	7.73968e-06	5.49296e-05	6.6035e-06	6.35635e-06	0.000559102	7.65125e-06	6.63944e-06	6.73331e-06	6.40003e-06	0.000646159	0.00132379	0.000729496	0.00114904	0.00433355	0.00168151	0.00325147	0.000445155	7.01008e-06	0.000712237	0.000922988	0.00828518	0.000177838	0.000961463	6.4774e-06	6.4469e-06	5.93157e-06	6.97649e-06
20764			level4			181.071	27.3	POS													0.0249941	0.0900154	0.033936	0.0140201	0.0192038	0.00304949	0.00217563	0.0661643	0.00579409	0.0941491	0.0230578	0.00711896	0.0423895	0.00406221	0.00245108	0.00940455	0.00607376	0.00268674	0.00388603	0.00473393	0.0229683	0.00295577	0.0029154	0.00237976	0.00390633	0.0030292	0.00301512	0.00242309	0.0101141
21026			level4	Puerarin xyloside	-23.294	549.487	25.8	POS													8.04405e-06	7.35748e-06	7.73968e-06	5.49296e-05	6.6035e-06	6.35635e-06	6.10878e-06	7.65125e-06	0.00256475	6.73331e-06	6.40003e-06	1.19552e-05	0.000386441	0.00291422	0.000990789	0.00896632	0.00172612	0.000459	0.00155896	7.01008e-06	0.000985175	0.00117096	0.020217	7.40883e-06	0.00173843	6.4774e-06	6.4469e-06	0.00355658	6.97649e-06
21054			level4			766.558	25.8	POS													0.00474356	0.000491631	7.73968e-06	0.00481628	0.00130736	0.00399108	0.00561036	0.00352181	0.0168801	0.00944195	6.40003e-06	0.007572	0.00679943	0.0146716	0.00853061	0.0586085	0.0100118	0.011999	0.0127562	0.000784838	0.00912762	0.0180005	0.0658793	0.00112858	0.0164172	0.000943152	0.00114249	0.0219048	6.97649e-06
21055			level4			767.562	25.8	POS													0.000581972	0.00166344	0.00146142	0.00509342	0.000758299	0.000699986	0.00163283	7.65125e-06	0.00651529	0.00334104	0.000859213	0.000957811	0.00200954	0.00605605	0.00406651	0.0240614	0.00338465	0.00571068	0.00501525	0.000991364	0.00374339	0.00695263	0.0273717	0.00157424	0.0070624	0.00111103	0.0017477	0.0099171	6.97649e-06
21058			level4			794.592	25.8	POS													0.000942967	7.35748e-06	7.73968e-06	5.49296e-05	6.6035e-06	0.00188809	6.10878e-06	0.00123932	0.00165882	6.73331e-06	6.40003e-06	0.00266544	0.000944666	0.00525344	0.00262694	0.019283	0.00487873	0.00487901	0.00217284	7.01008e-06	0.00242681	0.000756272	0.0234616	7.40883e-06	0.0039971	0.000417622	6.4469e-06	0.00232783	6.97649e-06
21079			level4	Digallate	3.79674	323.232	25.6	POS													0.00127501	0.0010173	0.000687908	0.00183557	0.00132876	0.00171205	0.00148859	0.000380454	0.000693881	0.00153599	0.00178931	1.19552e-05	0.0023344	0.00206306	0.00131511	6.9597e-06	0.00154236	0.00173806	0.0022531	0.00156788	0.00132889	0.000820159	0.0016189	0.00117432	0.00126818	6.4774e-06	0.00173827	0.000389845	0.000449018
21530			level4			895.756	22.6	POS													8.04405e-06	7.35748e-06	7.73968e-06	0.0149263	6.6035e-06	6.35635e-06	0.00291694	7.65125e-06	0.00987772	0.00424627	6.40003e-06	1.19552e-05	7.29904e-06	7.27281e-06	0.000233965	0.000549372	6.03329e-06	0.00515025	0.0309277	7.01008e-06	0.00344591	0.00317808	0.00319348	7.40883e-06	0.000383834	6.4774e-06	0.000760346	0.0368025	6.97649e-06
22265			level4			452.85	14.6	POS													8.04405e-06	7.35748e-06	7.73968e-06	5.49296e-05	6.6035e-06	6.35635e-06	6.10878e-06	7.65125e-06	6.63944e-06	6.73331e-06	6.40003e-06	1.19552e-05	7.29904e-06	7.27281e-06	6.71202e-06	6.9597e-06	6.03329e-06	6.81434e-06	6.99202e-06	7.01008e-06	9.5806e-06	0.000461726	0.309697	2.48728e-05	0.00109694	6.4774e-06	6.4469e-06	0.000211959	6.97649e-06
22271			level4			162.972	14.4	POS													0.000728778	0.000272847	0.000605357	0.00291473	0.000866047	0.000245379	0.000553965	0.000583047	0.000331284	0.000316051	6.40003e-06	0.000574905	0.000247156	0.000165557	0.000353798	0.000703068	6.03329e-06	0.000844577	0.000260541	0.000942158	0.000576084	0.000946755	0.125239	7.40883e-06	0.00112583	0.00134803	0.000118875	0.000668077	0.000209438
22314			level4			501.372	13.8	POS													0.000179139	5.34478e-05	3.75665e-05	0.000863751	6.6035e-06	6.35635e-06	0.00038812	0.000101511	0.000306754	0.000126929	4.32116e-05	0.000636019	0.00033213	0.000185211	0.000192575	0.000994988	0.00103054	0.000132726	0.00023155	7.01008e-06	0.000292807	0.000251002	0.0063582	3.13646e-05	0.000764049	7.89423e-05	0.000205896	0.000374645	6.30035e-05
22331			level4			343.074	13.7	POS													0.00211546	0.00177654	0.000979395	0.00809985	0.00114493	0.000901584	0.000981311	0.00276948	0.00135699	0.000449419	0.003341	0.00298914	0.000915102	0.000421653	0.00125528	0.000254648	0.000956858	0.000573421	0.000806699	0.00175467	0.00169217	0.000532199	0.000220621	0.00101888	0.00155122	0.000867585	0.000948621	0.000536397	0.00226673
22350			level4	7,8-dihydroneopterin 3'-phosphate	-10.7342	334.202	13.5	POS													0.00137363	0.00143529	0.000734701	0.00961461	0.000603142	0.00107527	0.000815859	0.00269813	0.00112442	0.000213717	0.00341756	0.00251824	0.000668703	0.000437596	0.000832163	0.00024796	0.0010276	0.000113899	0.000364375	0.00183409	0.00155755	0.000290897	0.000630773	0.000666417	0.00127014	0.000272372	0.00143027	0.000523092	0.00270699
22356			level4	cis-Chlorobenzene dihydrodiol	12.8984	250.917	13.3	POS													0.000383613	0.000143972	0.000680623	0.00133801	0.000739277	0.000449829	0.00078035	0.000383198	0.000491002	0.000459294	6.40003e-06	0.00207689	7.29904e-06	0.000708544	0.000951821	6.9597e-06	6.83605e-05	0.00127241	0.000455381	0.00116845	0.000628584	0.000258087	3.35652e-05	0.000795893	5.11527e-05	0.000117039	5.45031e-05	0.000238251	0.000125878
22357			level4			311.126	13.3	POS													0.00755598	0.00700269	0.00331537	0.0365172	0.00234834	0.00178962	0.0033158	0.00804248	0.00521292	0.000724529	0.00933182	0.00888768	0.0042936	0.00179161	0.00256005	0.000483932	0.0037752	0.000889373	0.00208465	0.00590227	0.00579126	0.0011278	0.00124757	0.00265651	0.00471953	0.00121358	0.00636225	0.00209631	0.00873525
22366			level4			320.186	13.2	POS													0.00263469	0.00286536	0.00155313	0.0115041	0.000936236	0.000569927	0.00112281	0.00355155	0.000892295	0.000298311	0.00346931	0.00470496	0.00111054	0.000824371	0.000939628	0.000269094	0.0017487	0.000448613	0.000741128	0.00197709	0.00210809	0.000367671	0.000255914	0.00105257	0.00143602	0.000520582	0.00136292	0.00075317	0.00385174
22387			level4			312.13	13	POS													0.00115022	0.00102395	0.000588592	0.00452247	0.000440906	0.000367581	0.000608191	0.00101593	0.000832415	0.000321087	0.00133596	0.00123661	0.00054087	0.000345939	0.000341296	0.00038321	0.000619251	0.000236978	0.000379617	0.00103995	0.000866551	0.000447264	0.000305502	0.000441233	0.000169561	0.000367882	0.000594656	0.000334669	0.00107699
22388			level4			339.157	13	POS													0.00268047	0.001802	0.000996054	0.00726801	0.000704059	0.00115585	0.000981849	0.00214996	0.00315548	0.000442583	0.00107184	0.00335736	0.00143222	0.000546219	0.00122071	0.000218334	0.00224683	0.000247548	0.000463832	0.00169247	0.00169168	0.000404622	0.000488075	0.000981983	0.00163526	0.000587841	0.0020467	0.000741387	0.00157251
22389			level4			348.217	13	POS													0.00122125	0.000853975	0.000492753	0.00253451	0.000233522	0.000369958	0.000363893	0.000876579	0.000478665	0.000150922	0.000507391	0.00142488	0.000251162	0.000265048	0.000564313	0.000167266	0.00107197	0.000301515	0.00031517	0.000491373	0.000646806	0.00023325	0.000106663	0.000497402	0.0005189	0.000255083	0.000519809	0.000249652	0.000671437
22685			level4	(3-Methoxy-4-phosphonooxyphenyl)-oxomethanesulfonic acid	-13.2084	311.169	359.3	NEG													0.0133774	0.00672217	0.00645508	0.0206392	0.0133184	0.00540507	0.0135897	0.0050629	0.0024323	0.0152552	0.00608719	0.00494649	0.013004	0.00416435	0.0058179	0.0149363	0.00451197	0.0159617	0.00840191	0.00501244	0.00925508	0.00626253	0.0134646	0.0134832	0.0146682	0.0145915	0.00454808	0.0146525	0.0138778
22697			level4			258.987	358.9	NEG													0.000618942	0.00054153	0.000368624	0.000558105	0.000490068	0.000482976	0.000423255	0.000587554	0.000530919	0.000448652	0.000448819	0.000379105	0.000590626	0.000465418	0.000517131	0.000631728	0.000450453	0.000775887	0.00056655	0.000500711	0.000518853	0.000570531	0.000337321	0.000453389	0.000662701	0.000482726	0.000495705	0.000502108	0.000321311
22882			level4			390.855	355.4	NEG													0.0030576	0.00347227	0.00346783	0.00232873	0.00202521	0.00240578	0.00101017	0.00282939	0.00235807	0.00254991	0.000812656	0.00218541	0.00190986	0.00354141	0.00173431	0.00229701	0.00215516	0.003206	0.00407394	0.00162737	0.0024524	0.00305479	0.00237113	0.00316502	0.00224459	0.00274518	0.00287493	0.00266977	0.00174268
23364			level4	Cer(d17:1/16:0)	15.2258	522.888	331.9	NEG													0.00248249	0.00218241	0.00229459	0.00325442	0.00342039	0.000445021	0.00117027	0.0036015	0.00193083	0.00467861	0.00256373	0.00145137	0.000334456	0.00289224	0.00481547	0.00353354	0.00446491	0.000783142	0.00213729	0.00341775	0.00259272	0.00410774	0.00323376	0.00170762	0.00383595	0.00589829	0.00373824	0.00299006	0.00384953
23416			level4	Tetrachlorosalicylanilide	21.585	350.012	328.4	NEG													0.0353744	0.0393913	0.00631307	0.0336131	0.0398882	0.0349003	0.0385424	0.0396061	0.0414968	0.00655629	0.0389029	0.0364508	0.0362188	0.0221762	0.0391712	0.0405454	0.0218881	0.0361822	0.0255304	0.0396924	0.032622	0.039896	0.0377108	0.0347227	0.0406522	0.0435591	0.0386205	0.042639	0.0400127
23555			level4			391.909	319.8	NEG													0.00428266	0.00461163	0.00389094	0.00695617	0.00363539	0.00367425	0.00437098	0.00419119	0.00396512	0.00660217	0.00380529	0.00412529	0.00515368	0.00503745	0.00518147	0.00473083	0.00481771	0.00495	0.00512045	0.00475157	0.00469271	0.00541061	0.00445815	0.00471676	0.00460712	0.00575356	0.00487886	0.00560218	0.00564966
23556			level4			394.906	319.8	NEG													0.00106919	0.000938717	0.00138609	0.00084235	0.00120635	0.000787104	0.000978463	0.00134111	0.00129855	0.00118778	0.00102629	0.000560142	0.0012208	0.000673498	0.000570115	0.00100074	0.00104378	0.000738319	0.000873956	0.000860697	0.000980203	0.00139625	0.00132738	0.00116068	0.00139755	0.000673835	0.00118171	0.00136819	0.00159053
23575			level4			227.102	319.1	NEG													0.000948993	0.00162792	0.00456516	0.003394	0.00171488	0.00217227	0.00165105	0.0028765	0.00198673	0.00179361	0.00294901	0.00205464	0.0015391	0.00237205	0.00146772	0.00366535	0.00313144	0.00552264	0.00135445	0.00303169	0.00249096	0.00279602	0.00765697	0.00146519	0.00245402	0.00184245	0.00154221	0.00297432	0.00292514
23576			level4			310.902	319.1	NEG													0.00241826	0.00504358	0.00227733	0.00606729	0.00356734	0.00318347	0.00406326	0.00583403	0.00332959	0.00471737	0.00465805	0.0030881	0.00515934	0.00439813	0.00466507	0.00537009	0.00558523	0.00444656	0.00482071	0.00213047	0.00424116	0.00565426	0.00419064	0.00368966	0.00503605	0.00636404	0.00332431	0.00663046	0.00572429
23630			level4			286.912	317.3	NEG													0.00515401	0.00581044	0.00406754	0.00685708	0.00483704	0.0056406	0.00455159	0.00533296	0.00570268	0.00698495	0.00471062	0.00380027	0.00545343	0.00559455	0.00622922	0.00500409	0.0060621	0.00551698	0.00598265	0.00501575	0.00541543	0.00514218	0.00511643	0.00513373	0.00535198	0.00766548	0.00562344	0.00645033	0.00605716
23632			level4			210.932	317.2	NEG													0.0092724	0.0093244	0.0062473	0.0154382	0.0101991	0.00892826	0.00753144	0.0117101	0.0112156	0.0106166	0.00886986	0.00913686	0.00925191	0.00887217	0.00766812	0.0101294	0.0105494	0.0108945	0.0108739	0.00881702	0.00977733	0.010659	0.0105334	0.0105015	0.01085	0.0131553	0.00984748	0.00967767	0.0110356
23634			level4			383.011	317.2	NEG													0.000387415	0.000240096	0.000147217	0.000548585	0.00034129	0.000935675	0.000286282	0.000455513	0.00061402	0.000632517	0.000520681	0.000332966	0.000605916	0.000528322	0.000445959	0.000431328	0.000631323	0.000585599	0.000497901	0.000601667	0.000488513	0.000432919	0.000535816	0.000527184	0.000521951	0.000878452	0.00065156	0.000562829	0.000789815
23648			level4	Cer(d17:1/16:0)	-6.34373	522.876	316.7	NEG													0.00153721	0.00160469	0.00150941	0.00151344	0.00154168	0.0012708	0.00147696	0.0017531	0.00150062	0.00170232	0.00155623	0.00138765	0.00172426	0.00117548	0.00125224	0.00172668	0.00154105	0.00127051	0.00136467	0.00158658	0.00149978	0.0015144	0.00120501	0.00147252	0.00137366	0.00153701	0.00119263	0.00153794	0.00158605
23682			level4			220.971	315.2	NEG													0.00431516	0.00673483	0.00990096	0.0112503	0.00797945	0.00421007	0.0067599	0.00800734	0.0130635	0.00921583	0.00521018	0.00623925	0.00529853	0.00897027	0.00559814	0.00757329	0.00614822	0.00551286	0.00590918	0.00567862	0.0071788	0.00686028	0.0127198	0.00546436	0.00734077	0.0124633	0.00525845	0.00669234	0.0120866
23738			level4			341.931	313.1	NEG													0.00150785	0.00157383	0.000973261	0.000466944	0.0012114	0.00127121	0.00103616	0.00164408	0.00156031	0.00182268	0.00100242	0.000934587	0.00148143	0.00142956	0.00159777	0.0013348	0.00202452	0.00161721	0.00199914	0.00136638	0.00139278	0.00150076	0.00141822	0.00152624	0.000826743	0.0028831	0.0011726	0.00170905	0.00137619
23744			level4			262.954	312.8	NEG													0.0171435	0.0209734	0.0161786	0.0182305	0.018252	0.0174402	0.016526	0.0191825	0.0226991	0.0233082	0.0158253	0.0146111	0.0186944	0.0176365	0.0204515	0.0186222	0.0218018	0.0206818	0.0227161	0.0283688	0.0194672	0.0315691	0.0308611	0.0351226	0.0221957	0.0528434	0.019877	0.0209646	0.0214251
23759			level4			290.965	312.4	NEG													0.000432773	0.000523282	0.00044434	0.000480677	0.000534195	0.000596201	0.000534782	0.000540259	0.000367358	0.000540129	0.000317599	0.000503336	0.000648048	0.000613336	0.000659165	0.000532721	0.000693181	0.000695186	0.000436248	0.000736825	0.000541482	0.000587255	0.000629169	0.000434815	0.000685719	0.000959376	0.000422685	0.000782779	0.00057702
23760			level4			340.931	312.4	NEG													0.00894032	0.0123294	0.00777117	0.00506222	0.00800767	0.0091372	0.00807949	0.00965542	0.00933484	0.00331677	0.00629541	0.00636063	0.00485866	0.00161421	0.010487	0.00962818	0.0124931	0.0110349	0.0117928	0.00878942	0.00824944	0.00921843	0.00962539	0.0107765	0.00648908	0.0176971	0.0106803	0.0111584	0.00256683
23777			level4			352.967	312.1	NEG													0.00193859	0.00231966	0.000858058	0.000720544	0.00120703	0.000971012	0.00114633	0.00128234	0.00136844	0.00273435	0.000384418	0.000858502	0.00167087	0.00142831	0.00222058	0.00155024	0.00175478	0.00159425	0.00347688	0.00121423	0.00153497	0.00122168	0.00139027	0.00193575	0.000846707	0.00313255	0.00162069	0.00227765	0.00199266
23858			level4			290.946	310.8	NEG													0.00351712	0.00236751	0.00209233	0.000612175	0.000152503	0.00157133	0.00143911	0.0036977	0.00184711	0.00202808	0.00164172	0.00165073	0.00342964	0.00323133	0.00178834	0.00216447	0.00502987	0.00216783	0.00191836	0.00235797	0.00223526	0.00400502	0.0029202	0.00160343	0.00190303	0.00342951	0.0019358	0.00289417	0.00299502
23895			level4			274.99	309.9	NEG													0.0158513	0.0177076	0.00965427	0.0120992	0.00526029	0.0147278	0.0136271	0.0134151	0.0162022	0.0203302	0.0108131	0.00496717	0.00942959	0.0135595	0.0169334	0.0154059	0.0186684	0.017364	0.0213019	0.00562896	0.0136473	0.0128179	0.0164938	0.0153129	0.0119099	0.0318524	0.00673916	0.0194696	0.0148894
23922			level4			306.917	309.4	NEG													0.00650853	0.0100006	0.00713032	0.00850561	0.00812646	0.00696221	0.00613052	0.00743564	0.006545	0.00788158	0.00698085	0.00941298	0.0084822	0.00646933	0.00882031	0.00810637	0.00525209	0.00667484	0.00782037	0.00725856	0.00752522	0.00840178	0.00878883	0.0096963	0.00687286	0.00783405	0.00801888	0.00688033	0.00706008
23924			level4			275.99	309.3	NEG													0.000584683	0.000763723	0.000349864	0.000401429	0.000262883	0.000814579	0.000615668	0.00051329	0.000575185	0.00090581	0.000121735	0.000163088	0.000732687	0.000598849	0.00110288	0.000983761	0.000883037	0.00105427	0.0014999	0.000654789	0.000679106	0.000605373	0.000989978	0.000693488	0.00041355	0.00275855	0.000802289	0.000579585	0.000736729
24052			level4			292.087	303.4	NEG													0.0165328	0.021271	0.0143458	0.00240888	0.0152145	0.0103819	0.00497091	0.0146428	0.00574749	0.0203726	0.00405107	0.00940728	0.0142191	0.00468849	0.0163104	0.00852512	0.0178492	0.0202433	0.0046074	0.0128102	0.01193	0.0129066	0.0139363	0.0132943	0.00905358	0.0163758	0.00958501	0.0205801	0.0139419
24074			level4			243.075	301.3	NEG													0.00100186	0.000737121	0.000396181	0.000317367	0.000598748	0.000535718	0.000481145	0.000988833	0.00058022	0.000592786	0.000169801	0.000752058	0.000675912	0.000410419	0.000715752	0.00219678	0.000295416	0.00145004	0.000989727	0.000990231	0.000743806	0.000408787	0.00225902	0.00071246	0.0006182	0.000902378	0.000675076	0.000655512	0.00111064
24102			level4	Ammonia aspartate	23.7957	145.098	297.9	NEG													0.00487404	0.00317933	0.00303506	0.0113976	0.00511669	0.00172228	0.00511405	0.00750892	0.00589425	0.00241039	0.0048917	0.00729832	0.00674702	0.00724749	0.00484588	0.0174963	0.00177366	0.0154948	0.00599794	0.00749334	0.00647696	0.0021294	0.0237869	0.00280217	0.0080511	0.00529542	0.00415367	0.0053352	0.0073395
24112			level4			253.924	297.1	NEG													0.0031329	0.00297307	0.000846969	0.000711185	0.00154459	0.00127165	0.00138216	0.00167905	0.00246153	0.00392893	0.0015127	0.000784138	0.000823508	0.00132026	0.00250214	0.00177189	0.00242638	0.00119986	0.0031692	0.00302119	0.00192317	0.00194519	0.00182804	0.00267419	0.000974088	0.00539727	0.00406412	0.00267043	0.00253037
24321			level4	(S)-Hydroxyhexanoyl-CoA	23.6782	880.694	285.3	NEG													0.00126199	0.0013644	0.00187666	0.000312693	0.00070695	0.00193045	0.00075347	0.00147199	0.00136328	0.00105145	0.00147518	0.00138123	0.000645066	0.00232711	0.00140671	0.00140229	0.00181915	0.00139688	0.00238661	0.000782383	0.0013558	0.000632519	0.000361363	0.00109402	0.000767625	0.000878374	0.00164707	0.00105589	0.000637043
24359			level4			741.751	283.5	NEG													0.00307489	0.00235523	0.00135456	0.000141887	0.00211446	0.00317086	0.00260059	0.00186999	0.00257997	0.00191202	0.00240152	0.00136054	0.0024602	0.00260633	0.00327019	0.0015138	0.00209321	0.00224343	0.00247844	0.00158622	0.00215942	0.00176088	0.000662085	0.00273169	0.00123461	0.000951601	0.00277785	0.00149388	0.00319141
24385			level4			798.726	283	NEG													0.0023119	0.000896331	0.00264002	0.000133787	0.0011612	0.00207443	0.00118403	0.00241126	0.00246975	0.00125851	0.00173392	0.000868384	0.00069331	0.00153183	0.000991055	0.00133142	0.00138196	0.00192368	0.00135038	0.00143286	0.001489	0.00150181	0.000415687	0.00237583	0.000469871	0.000248228	0.00140752	0.00253281	0.00124627
24422			level4			948.696	282.2	NEG													0.00201274	0.000601103	0.00212344	0.000539914	0.00155472	0.00176701	0.00156441	0.00431547	0.00204798	0.00158737	0.00241887	0.000623222	0.00281511	0.00126536	0.00176387	0.00158952	0.00131162	0.00151083	0.00146183	0.00259727	0.00177358	0.000660398	0.00043298	0.00197939	0.000596469	0.000346279	0.000583748	0.00189499	0.00260268
24423			level4			956.684	282.2	NEG													0.000805766	0.00105928	0.000934859	0.000110006	0.0012945	0.00169734	0.0015496	0.000723463	0.0017485	0.000932006	0.00175415	0.000942463	0.00150115	0.00135537	0.00121983	0.00101563	0.00077175	0.00140178	0.00063149	0.00122667	0.00113378	0.0007369	0.000390862	0.00117344	0.000719032	0.000257935	0.00120928	0.00117392	0.00198084
24429			level4	PA(16:0/14:0)	-6.80274	619.827	281.9	NEG													0.00805022	0.00553081	0.0107993	0.00169455	0.00989012	0.00503386	0.0102672	0.0058847	0.00678499	0.00553426	0.00696991	0.00629397	0.0104135	0.00963586	0.00706178	0.0106379	0.00392874	0.00602656	0.0056233	0.0100392	0.00730504	0.00248062	0.0046155	0.00805393	0.0024572	0.0021	0.00697417	0.00612772	0.00992637
24434			level4			729.776	281.9	NEG													0.00714989	0.00621849	0.0104808	0.00125604	0.00995077	0.00703189	0.00706591	0.0120947	0.00818636	0.00550077	0.00450373	0.00614945	0.00915318	0.00895579	0.00423014	0.00822058	0.00459109	0.00701511	0.00527484	0.00950447	0.0071267	0.00670708	0.00364726	0.00799889	0.00336779	0.000982518	0.00694105	0.00899944	0.0103378
24436			level4			846.731	281.9	NEG													0.00282597	0.00203487	0.00214568	0.000452511	0.00159856	0.00213181	0.00428023	0.00473412	0.00177713	0.00191817	0.00280738	0.00177314	0.00200981	0.00234437	0.00252939	0.00264697	0.00147061	0.00305166	0.00247911	0.00181474	0.00234131	0.00150945	0.000995714	0.002961	0.000503025	0.000527571	0.00230503	0.00214265	0.00306762
24438			level4	Plactin D	1.07599	627.812	281.8	NEG													0.00715984	0.00574942	0.00909338	0.00126782	0.00770846	0.00692588	0.0118056	0.00490094	0.00895655	0.00485573	0.0108342	0.0071818	0.0106441	0.00926622	0.00330058	0.0101729	0.00459947	0.00944609	0.00542178	0.0109089	0.00750999	0.00246897	0.00554803	0.00790059	0.00756202	0.0013467	0.00380661	0.00804883	0.0101584
24439			level4	PA(10:0/6 keto-PGF1alpha)	-12.8513	677.781	281.8	NEG													0.0056635	0.0037723	0.0117187	0.00125407	0.00875804	0.00417348	0.0108267	0.00441511	0.00574399	0.0026176	0.00915743	0.00525471	0.00812188	0.00705419	0.00456319	0.00538624	0.00311791	0.00795946	0.00299852	0.00460216	0.00585796	0.0039589	0.00302107	0.00392018	0.00628295	0.00050099	0.00638279	0.00540373	0.0047075
24440			level4			738.746	281.8	NEG													0.00165544	0.00112538	0.00132934	0.000238541	0.00139871	0.00171212	0.00396748	0.00438297	0.00153484	0.00117621	0.00188299	0.00104274	0.00170093	0.00249935	0.000833019	0.000967529	0.000970084	0.00178711	0.00216744	0.00371744	0.00180448	0.00110046	0.000597063	0.00127729	0.000573007	0.000543201	0.00131236	0.00176825	0.00125243
24441			level4	2-Hydroxypropyl starch	-15.7837	779.747	281.8	NEG													0.00228664	0.00171731	0.00419723	0.000672275	0.00211127	0.00251967	0.00465857	0.00630715	0.00295628	0.00203666	0.00420593	0.0035304	0.00269349	0.00395512	0.00216381	0.0031129	0.00151688	0.0038206	0.000929925	0.00439065	0.00298914	0.00125953	0.00126998	0.00252814	0.00170637	0.000837245	0.00285898	0.0034654	0.00258892
24447			level4			669.796	281.6	NEG													0.00709997	0.00408863	0.00529333	0.00194065	0.00966005	0.00553062	0.00938702	0.0126855	0.00718824	0.0041556	0.00919376	0.00335366	0.00920789	0.0079379	0.00506333	0.00816403	0.00339661	0.008126	0.00375029	0.00950257	0.00673628	0.00444341	0.00387272	0.00596384	0.00692619	0.000866345	0.00693773	0.00577606	0.00835988
24449			level4			728.795	281.6	NEG													0.0313882	0.0280882	0.0231619	0.0183327	0.0505018	0.028152	0.0543715	0.0128655	0.0332293	0.028812	0.0542912	0.0580535	0.0455317	0.0146614	0.0316678	0.0496158	0.0237475	0.0409448	0.0245701	0.0474937	0.034974	0.0477675	0.0192666	0.0230986	0.0418265	0.0106683	0.0284566	0.0302879	0.0473055
24452			level4	Phyllanthusol A	-0.410532	786.751	281.6	NEG													0.00477671	0.00246892	0.00376099	0.00112643	0.00585214	0.00380067	0.00788025	0.00505386	0.00499228	0.00310919	0.00724084	0.0032437	0.0061609	0.00549901	0.0036553	0.00519027	0.00252433	0.00503797	0.00290662	0.00225249	0.00432664	0.00256317	0.0022025	0.00294302	0.00233188	0.00122101	0.00257656	0.00366086	0.00549799
24453			level4	malonylshisonin	6.96197	828.735	281.6	NEG													0.00615931	0.00331067	0.0055503	0.00240895	0.00516446	0.00502269	0.0109429	0.0126761	0.00555167	0.00361603	0.00833727	0.00591882	0.00800167	0.00629326	0.00447227	0.00660173	0.00257905	0.00818192	0.0032277	0.010087	0.00620518	0.00733706	0.00380713	0.00426853	0.00457411	0.000538979	0.00521896	0.00537962	0.00623516
24455			level4			877.725	281.6	NEG													0.00133262	0.000735662	0.0013796	0.000245303	0.00137113	0.000623165	0.00171553	0.00323227	0.00123945	0.000497221	0.00151436	0.00125001	0.00208152	0.00174197	0.00100317	0.00142284	0.00049635	0.00112679	0.00025541	0.00129694	0.00122807	0.00122777	0.000463409	0.00105711	0.000721483	0.000114616	0.00142363	0.00109745	0.00148221
24460			level4			744.767	281.5	NEG													0.0225168	0.0147905	0.0343848	0.0112902	0.0120644	0.0188994	0.033167	0.0120833	0.0250392	0.0159208	0.0344145	0.0393647	0.0277857	0.0232385	0.0190889	0.0250994	0.0135013	0.0267085	0.0131404	0.0224825	0.022249	0.012015	0.0174895	0.0199953	0.0242001	0.00628592	0.0232607	0.0157282	0.0200766
24461			level4			746.731	281.5	NEG													0.00156537	0.00137302	0.00220653	0.000815223	0.00259666	0.00121849	0.00437917	0.00296707	0.00244011	0.00142095	0.00140086	0.00236337	0.00257679	0.00160214	0.0010904	0.00140658	0.000281641	0.0021155	0.00108377	0.00313482	0.00190192	0.0014822	0.00106434	0.00154805	0.00216287	0.000498175	0.00257049	0.00074669	0.00128749
24463			level4	Triglutamate folate	14.3308	827.754	281.5	NEG													0.00317844	0.00211353	0.00314233	0.000436519	0.00190569	0.00302735	0.00520004	0.00297879	0.00310033	0.00213495	0.00240018	0.00378915	0.000909784	0.00374428	0.00163711	0.00359366	0.0012405	0.00324156	0.00147482	0.00388911	0.00265691	0.00365254	0.00154841	0.00287607	0.00182475	8.15558e-06	0.00213332	0.00296649	0.00381996
24472			level4			777.783	281.3	NEG													0.00276134	0.00186596	0.00265746	0.00038961	0.00243287	0.0025543	0.00180311	0.00180104	0.00246616	0.0013398	0.00183511	0.00104042	0.00220826	0.00311505	0.00195782	0.00229011	0.0013056	0.00289324	0.00164967	0.00215829	0.00202626	0.00211867	0.00136206	0.00189575	0.00127036	0.000209793	0.00201388	0.00248018	0.00379378
24473			level4			778.765	281.3	NEG													0.00513821	0.00333943	0.00580591	0.000957349	0.00367555	0.00449809	0.00310664	0.00842847	0.00515876	0.00308775	0.00691354	0.00211367	0.00588648	0.00512162	0.00380172	0.00290865	0.00256216	0.00511767	0.00352224	0.00628884	0.00437164	0.00497409	0.00204157	0.00513236	0.00169614	0.000281353	0.00458077	0.00469475	0.00497281
24478			level4	Madlongiside C	-12.4423	635.798	281.2	NEG													0.00125547	0.00155438	0.00576167	0.000483541	0.00458733	0.00229397	0.00516703	0.00323718	0.00232295	0.0019818	0.00464437	0.00166523	0.0013838	0.00276206	0.00253163	0.00200874	0.00222637	0.00395037	0.001902	0.00429452	0.00280072	0.00442262	0.00155822	0.0024939	0.00133631	0.000982225	0.00122408	0.00244609	0.00296567
24480			level4	Visudyne	5.3931	717.804	281.2	NEG													0.00578194	0.00472956	0.00572161	0.00156969	0.00760166	0.00502913	0.00710248	0.0135685	0.00695073	0.00453403	0.0111061	0.0126952	0.00753141	0.00324716	0.00442447	0.00982719	0.00246643	0.00800331	0.0038943	0.00913864	0.00674617	0.00514333	0.00409834	0.00668834	0.00652794	0.000382533	0.00534209	0.0065217	0.00836312
24481			level4			826.771	281.2	NEG													0.0131957	0.0102648	0.01312	0.00710452	0.00825399	0.0125969	0.0232482	0.0255709	0.0131468	0.0111739	0.0232001	0.0254113	0.0184835	0.0156552	0.0125062	0.0209425	0.0078529	0.0160029	0.0100185	0.0215673	0.0154658	0.010527	0.00968698	0.0139559	0.0164996	0.0027153	0.0125969	0.0134099	0.0155307
24482			level4			834.757	281.2	NEG													0.00189716	0.00157022	0.0024203	0.000763441	0.00303263	0.00188484	0.00221554	0.00213924	0.00223986	0.00188578	0.00283918	0.00168693	0.00265749	0.00252774	0.00158042	0.00349555	0.000636739	0.00269319	0.0013588	0.0013502	0.00204376	0.00102039	0.000965009	0.00212812	0.000998341	4.83286e-05	0.00200647	0.00206313	0.00258241
24483			level4			895.72	281.2	NEG													0.00156806	0.000970837	0.00256768	0.000676886	0.000667851	0.0013594	0.00161251	0.000888012	0.00172115	0.00130427	0.00218751	0.000559263	0.00176181	0.00144997	0.00117988	0.00125723	0.000474914	0.00136962	0.00117621	0.00109865	0.00129259	0.000407358	0.000280509	0.0010116	0.000400744	6.92917e-05	0.00135408	0.00189235	0.00190222
24491			level4			842.742	281.1	NEG													0.00822353	0.00770518	0.0160315	0.00531194	0.0057776	0.00636713	0.0167466	0.0171	0.0113629	0.00704353	0.0173064	0.0200383	0.0128529	0.0106487	0.00770997	0.0115931	0.00502484	0.0119005	0.00669564	0.0144914	0.0109966	0.00712211	0.00656313	0.00647438	0.00454939	0.0013995	0.00914253	0.00696933	0.00908978
24494			level4			196.933	281	NEG													0.00585257	0.0044588	0.0103441	0.0232403	0.00631649	0.0042404	0.00820168	0.0085832	0.00628858	0.00542798	0.00696339	0.0029361	0.00617299	0.00629894	0.00551108	0.00750552	0.00652445	0.0057269	0.00484435	0.00663138	0.00710346	0.00608171	0.00509009	0.00440718	0.00472461	0.00247381	0.00502281	0.00518074	0.00675399
24497			level4			330.88	281	NEG													0.0520134	0.0461177	0.0298284	0.0414755	0.0392535	0.0440093	0.0721951	0.0195758	0.0409169	0.0379496	0.0707601	0.0319247	0.0648896	0.0468509	0.0531258	0.0605681	0.0397767	0.0458602	0.0439841	0.0222238	0.045165	0.0407236	0.0541365	0.0219426	0.0370538	0.0276101	0.0620794	0.0306331	0.0523701
24513			level4			646.38	280.9	NEG													9.76413e-05	8.89294e-06	0.000110189	1.27469e-05	8.98691e-05	0.000124362	8.24451e-06	8.36801e-06	0.000322094	0.00014837	6.64292e-05	8.28813e-06	8.05552e-06	0.000329842	7.9958e-06	0.000339573	7.78735e-06	0.000764066	0.000145578	8.15532e-06	0.000130827	0.000854034	0.000449082	0.000721695	5.30942e-05	8.15558e-06	7.94877e-06	6.15897e-05	0.000572841
24516			level4			726.77	280.9	NEG													0.00566736	0.0035916	0.000894984	0.00110935	0.00678477	0.00289837	0.0102369	0.0111263	0.00692343	0.00359953	0.00984387	0.0068256	0.00766204	0.00672124	0.00448287	0.00545558	0.00196762	0.00755687	0.00325336	0.0083197	0.00574607	0.00693491	0.00347106	0.00481281	0.00344641	0.000269604	0.00500083	0.00424133	0.0062491
24521			level4			925.732	280.9	NEG													0.00165104	0.000460238	0.00274518	0.00473498	0.00168801	0.000382319	0.00193619	0.00278875	0.0010525	0.000586754	0.000891551	0.00106906	0.00139505	0.000465165	0.00063863	0.00123337	0.000279553	0.00135883	0.000390564	0.00197599	0.00138619	0.00128666	0.000634144	0.000905603	0.00063792	7.40767e-05	0.000820309	0.00130402	0.00179957
24524			level4			428.857	280.8	NEG													0.0530938	0.0546907	0.122207	0.0525344	0.115351	0.0496286	0.0989984	0.103974	0.0816398	0.0357746	0.0980181	0.0660428	0.0851123	0.08149	0.0634848	0.0867125	0.0429892	0.0807345	0.0530405	0.0797577	0.0752638	0.095428	0.067403	0.0562171	0.101179	0.0206523	0.0815082	0.0544213	0.0569462
24525			level4			454.2	280.8	NEG													0.000831231	0.000165387	0.000361347	0.000225705	0.000153323	4.31832e-05	0.00034736	0.000200647	0.000502245	5.85117e-05	9.43716e-05	0.00145604	0.000559408	0.000400161	0.000252401	0.000530967	7.78735e-06	0.00121712	5.58412e-05	0.000304085	0.000388356	0.000293141	0.00313112	0.000375102	0.00126807	8.15558e-06	0.000295243	0.000307011	0.000540296
24534			level4	Sinalbine	-8.46964	733.775	280.8	NEG													0.00262527	0.00138323	0.0054696	0.000721794	0.00337988	0.00163092	0.00244249	0.00441988	0.00301698	0.00191651	0.00340664	0.00648222	0.0037422	0.00302394	0.0018878	0.00293073	0.00147334	0.00376125	0.00119257	0.00454427	0.00297258	0.00156187	0.00169432	0.00250027	0.00156005	0.000116482	0.00302635	0.00177475	0.00240338
24536			level4			815.78	280.8	NEG													0.00235718	0.000730686	0.00475275	0.00110358	0.00317269	0.00177445	0.00408523	0.00586965	0.00214773	0.00154037	0.0036917	0.00195585	0.00327449	0.00261954	0.00128786	0.00411795	0.000589564	0.00187001	0.000931343	0.00410887	0.00259907	0.00133945	0.00169387	0.00171107	0.00160103	8.15558e-06	0.00199716	0.0021586	0.00333428
24542			level4			835.74	280.7	NEG													0.00349614	0.00205225	0.0036251	0.000476131	0.00395793	0.00243356	0.00389105	0.00657293	0.00394659	0.0016707	0.00316488	0.00172062	0.00372147	0.00288385	0.00197294	0.00318513	0.00127945	0.00378866	0.00173092	0.00497302	0.00302717	0.00377635	0.00142775	0.00229449	0.00118302	0.000465183	0.00277954	0.00295042	0.00369773
24543			level4	Pseudoecgonyl-CoA	-14.7885	933.718	280.7	NEG													0.00155739	0.000530231	0.00173528	0.00028962	0.0015824	0.000757691	0.00256298	0.00359422	0.00147262	0.00100097	0.00205735	0.0014765	0.00160972	0.00116534	0.000464147	0.00133191	0.000323066	0.00122296	0.000418984	0.00216403	0.00136587	0.00102142	0.000612462	0.00099237	0.00056057	0.000152863	0.000784508	0.000984507	0.00148838
24549			level4			626.809	280.6	NEG													0.00224643	0.00159145	0.00513546	0.00123584	0.0041031	0.00169394	0.00523788	0.00442935	0.00293922	0.00140999	0.00488722	0.00794364	0.00417218	0.00276544	0.00219024	0.00336379	0.00102958	0.00431577	0.00123496	0.00363865	0.00327821	0.00397561	0.00270937	0.00223555	0.0019979	0.000579952	0.00316731	0.00188974	0.00256357
24550			level4	Dihydroergocristine mesylate	-22.3546	706.813	280.6	NEG													0.0271632	0.0172034	0.0572086	0.0181853	0.0466782	0.0216241	0.044798	0.0629482	0.0275123	0.0194672	0.0479136	0.0857438	0.0406008	0.0311521	0.0179202	0.0431723	0.011304	0.037413	0.0134391	0.0465997	0.0359024	0.0413128	0.0238052	0.023361	0.0456368	0.00318493	0.0256099	0.0260261	0.0315147
24554			level4	TG(18:0/24:0/22:4(7Z,10Z,13Z,16Z))	23.8121	1022.72	280.6	NEG													0.00142622	0.000900728	0.00255669	0.000596524	0.00268297	0.00141933	0.00363527	0.00514708	0.00185488	0.00128848	0.00340096	0.00549787	0.00268973	0.00270453	0.000850642	0.00259325	0.00051131	0.00217106	0.000647135	0.00215262	0.00223636	0.00267248	0.00107789	0.00122797	0.00170807	8.15558e-06	0.00156809	0.00174186	0.00234546
24560			level4			774.778	280.5	NEG													0.00544554	0.00240296	0.0102331	0.00125976	0.00738385	0.00302016	0.00900788	0.00115993	0.00538549	0.00324577	0.00831565	0.0123505	0.00419375	0.00624079	0.00322609	0.00773278	0.00130949	0.00666559	0.00229513	0.00843481	0.00546545	0.00567718	0.00282474	0.00407172	0.00322061	7.29712e-05	0.00485279	0.00436069	0.00455854
24588			level4	Gallocatechin-(4alpha->8)-gallocatechin-(4alpha->8)-gallocatechin	-5.9287	913.758	280.2	NEG													0.000604662	0.000356195	0.000938847	0.000592571	0.000625125	0.00035829	0.000861613	0.00214921	0.000317593	0.000374723	0.0011961	0.000931431	0.000719269	0.000466691	0.000200731	0.00119314	6.00948e-05	0.000476445	0.000276125	0.00126801	0.000698344	0.000487349	4.66822e-05	0.00059578	0.000988268	5.84112e-05	0.00035114	0.000261786	0.000890791
24641			level4	Surfactin A	-4.1886	1007.3	278.9	NEG													0.0005211	8.89294e-06	0.000322518	0.000363873	0.000212913	7.27723e-06	0.000169453	0.000939793	8.21932e-06	0.000484639	8.53913e-06	0.000312954	0.000105675	0.000427432	7.79499e-05	0.00240861	7.95702e-05	0.000546561	0.000246582	0.000606941	0.000392975	0.00055691	0.00459468	7.83232e-06	0.00377431	8.15303e-05	0.000209758	0.00176157	0.000115478
24643			level4			740.307	278.8	NEG													7.44454e-05	0.00142701	0.0030152	0.000170212	0.00231408	0.00122573	0.00251466	0.000656434	0.00204946	0.00039788	0.00302858	0.00180461	0.00231728	0.00106848	0.00247897	0.00246709	0.00169927	8.70338e-06	0.000258083	0.00151269	0.00152444	0.00243104	0.00187953	0.00141114	0.000463573	8.15558e-06	0.00206531	0.00110227	0.00112607
24650			level4			588.277	278.6	NEG													0.000193705	8.89294e-06	8.20531e-06	0.000704638	0.000366138	7.27723e-06	0.000133159	0.000543667	0.000159501	8.6553e-06	0.000399796	0.000296968	0.00036784	0.000275837	7.9958e-06	8.63049e-06	7.78735e-06	0.000917068	0.000250114	0.000653832	0.000265985	5.99076e-05	0.00132001	0.000179841	0.00136659	0.000138538	0.000196918	0.000824379	0.000467816
24653			level4	TG(14:0/16:0/O-18:0)	23.7934	792.368	278.6	NEG													0.00172285	0.000292566	0.00182985	0.000104885	0.00121419	0.000330644	0.00142173	0.00125164	0.00090088	0.000606525	8.53913e-06	0.00361645	0.00201943	0.00403799	0.000845243	0.00348148	0.000225478	0.00436942	0.000401586	0.00165939	0.00151704	0.00102678	0.00712287	0.00258841	0.00547719	0.000179429	0.00257233	0.000534358	0.00439468
24668			level4			793.37	278.2	NEG													0.00078443	8.89294e-06	0.00107632	1.27469e-05	0.000380006	8.67428e-05	0.000429651	0.000105467	6.25212e-05	8.11056e-05	8.07165e-05	0.00121832	0.000833927	0.00118076	0.000295322	0.00163965	6.19689e-05	0.00185377	9.11403e-05	0.000628884	0.000545617	0.000520608	0.00212604	0.00075763	0.00225964	7.71276e-05	0.00101009	8.92314e-05	0.00165936
24669			level4			797.282	278.2	NEG													7.90341e-06	0.000365912	0.0016591	1.27469e-05	0.00108133	0.000214971	0.00147579	0.000210249	0.000723712	7.86802e-05	0.0013551	0.00137138	0.00113688	0.000340287	0.00110722	0.00109962	0.000493002	8.70338e-06	7.70776e-05	0.000598602	0.000670914	0.0011515	0.00080778	0.000281989	0.000872744	8.15558e-06	0.000870872	0.000186841	0.000522623
24677			level4			698.322	278	NEG													0.000260638	0.00116627	0.00190284	0.000599573	0.002044	0.00122518	0.00216128	0.000409948	0.00196229	0.00026025	0.00198092	0.00108296	0.0018577	0.00118005	0.00261876	0.00206216	0.00160234	0.000127667	0.000264805	0.000863392	0.00128165	0.00205624	0.00155929	0.00109643	0.00104195	5.86681e-05	0.00228744	0.000418246	0.00113301
24693			level4			702.309	277.7	NEG													5.35114e-05	0.00122426	0.000599547	1.27469e-05	0.00107826	0.00120773	0.000702835	8.61099e-05	0.00101532	0.000269575	0.000865798	0.00029555	0.000887332	0.000654257	0.00138558	0.000596094	0.00202419	5.62429e-05	0.000216254	0.000264549	0.000674787	0.00111132	0.000414596	0.00114443	6.93004e-05	8.15558e-06	0.00136094	0.000483598	0.000693985
24727			level4			89.9913	277.2	NEG													0.00875758	0.00686847	0.0046867	0.0113106	0.00489713	0.0105015	0.014116	0.00360989	0.00757689	0.00758696	0.00943474	0.0176248	0.00920987	0.00987285	0.00788849	0.00584833	0.00934187	0.020286	0.00863439	0.00708002	0.00925666	0.0084409	0.0128009	0.0118279	0.0071039	0.0110282	0.00905127	0.0114948	0.0180253
24731			level4			661.308	277.2	NEG													0.000175907	0.000650305	0.000342528	0.000125918	0.00057924	0.000463484	0.000679418	8.36801e-06	0.000741257	9.16312e-05	0.000375111	8.28813e-06	0.000536528	0.000247314	0.00143026	0.000222585	0.00137882	8.70338e-06	0.000151353	0.000133124	0.000417507	0.000266652	0.000644491	0.000484062	9.63527e-05	0.000103335	0.000910837	0.000321418	0.000157526
24757			level4			252.924	276.3	NEG													0.00409328	0.00521961	0.00475756	0.000561105	0.00492021	0.00301183	0.00524056	0.00495169	0.0028062	0.0036549	0.00400162	0.00319916	0.00447588	0.00576002	0.00507504	0.00597343	0.00487806	0.00318339	0.00362003	0.00467653	0.00420301	0.0053233	0.00355804	0.00601812	0.00280034	0.0133001	0.00528317	0.00379995	0.00515534
24770			level4	PA(12:0/22:6(5Z,8E,10Z,13Z,15E,19Z)-2OH(7S, 17S))	-13.0922	695.843	276	NEG													0.000919749	0.00113244	0.000721494	0.00064336	0.00085677	0.0011582	0.00117263	0.00146675	0.000767764	0.000789609	0.000433804	0.000600966	0.000345651	0.000336046	0.00192856	0.000880023	0.00270763	0.00125644	0.000520713	0.0010466	0.000984261	0.000445519	0.000347561	0.000806671	0.000170844	0.000281693	0.000920241	0.000431413	0.000700617
24880			level4			488.794	273.4	NEG													0.00121303	0.00145968	0.00126832	0.00068018	0.00160553	0.000694297	0.00158903	0.000977583	0.0013435	0.000786573	0.00134654	0.00082895	0.000924086	0.000889298	0.00177125	0.000631383	0.000275653	0.00130058	0.000698931	0.00142527	0.00108548	0.00131671	0.000578968	0.000743017	0.000755455	0.000601191	0.00138725	0.000696705	0.001249
24881			level4			804.218	273.4	NEG													0.00183273	7.77266e-05	0.00121978	0.00112218	0.000692377	0.000218519	0.000769639	0.00277872	8.21932e-06	0.000644571	0.000236956	0.00065591	0.000160362	0.000686898	0.000136623	0.00704549	4.00546e-05	0.000571011	0.000222203	0.00163968	0.00103798	0.00162809	0.0192513	0.000100532	0.0106709	0.000172278	0.000604321	0.00290284	0.000329311
24885			level4			767.267	273.3	NEG													0.000406352	3.98884e-05	0.000339254	1.27469e-05	8.89094e-05	7.27723e-06	0.000181423	0.000195299	8.21932e-06	0.000101899	0.000150726	0.000278599	8.05552e-06	0.000108752	5.7869e-05	0.00137982	7.78735e-06	8.43862e-05	7.73076e-05	0.000328131	0.000193135	0.000432577	0.00412664	7.83232e-06	0.00185311	8.15558e-06	0.000133058	0.000618185	0.000105511
24894			level4			706.242	273.1	NEG													0.00047449	8.89294e-06	0.000126276	0.000192244	3.96493e-05	7.27723e-06	8.24451e-06	0.00026896	8.21932e-06	0.000219721	8.53913e-06	8.28813e-06	8.05552e-06	0.000107655	7.9958e-06	0.00108305	7.78735e-06	7.62532e-05	7.32029e-05	0.000148436	0.000144162	0.000212316	0.0040223	7.83232e-06	0.0015005	0.000147379	7.90031e-05	0.000764628	5.42195e-05
24930			level4			274.99	271.8	NEG													0.0041849	0.00342165	0.00248828	0.00531413	0.00550216	0.00313916	0.00395833	0.0030147	0.0034403	0.0042116	0.00175904	0.00152733	0.00322418	0.00360017	0.00498353	0.00318169	0.00354729	0.00577888	0.00408153	0.00510471	0.00377318	0.00312476	0.00331561	0.00484292	0.00266328	0.00956814	0.00392041	0.00475143	0.0042997
24939			level4			289.949	271.6	NEG													0.00222752	0.00254841	0.00155943	1.27469e-05	0.00189015	0.00144039	0.00180562	0.00154796	0.00245887	0.00210102	0.000905892	0.000595866	0.00164403	0.00148208	0.00373966	0.000872849	0.0024641	0.00176394	0.00292332	0.00197632	0.00179801	0.00163159	0.00122609	0.00140504	0.000775596	0.00764707	0.00260475	0.00343324	0.00196205
24951			level4			288.95	271.2	NEG													0.0206278	0.0223211	0.0156432	0.00197881	0.020745	0.0146924	0.0169803	0.020099	0.023544	0.0243876	0.00744338	0.00914058	0.018365	0.0196564	0.0331646	0.0108061	0.0295657	0.0169561	0.0259468	0.0161625	0.0184113	0.0158912	0.0244907	0.019337	0.00960614	0.0827493	0.0213381	0.0231176	0.0196587
25015			level4			555.374	269.6	NEG													2.39519e-05	2.68999e-05	5.10842e-05	1.27469e-05	8.45926e-06	7.27723e-06	8.24451e-06	3.00336e-05	8.21932e-06	8.6553e-06	8.53913e-06	5.67677e-05	8.05552e-06	2.9835e-05	7.9958e-06	0.000159392	2.37186e-05	0.00018897	8.22997e-06	8.15532e-06	3.42616e-05	8.46404e-06	0.000115944	3.58025e-05	0.00026065	2.69894e-05	7.94877e-06	8.51141e-06	8.372e-05
25053			level4			709.328	268.8	NEG													0.000443433	8.89294e-06	4.93e-05	0.000134359	0.000291668	0.000165444	8.24451e-06	0.000127976	0.000274722	9.64362e-05	0.000171951	0.000363549	0.000303414	0.0003194	4.25218e-05	0.000357904	6.64955e-05	0.000696674	9.32104e-05	0.000720352	0.000236797	0.000131926	0.0019015	9.60224e-05	0.00105874	8.15558e-06	0.000136147	0.0008491	0.000149251
25107			level4			497.274	267.6	NEG													7.90341e-06	8.89294e-06	8.20531e-06	1.27469e-05	8.45926e-06	7.27723e-06	8.24451e-06	0.000161318	6.77925e-05	0.000155582	8.53913e-06	3.22591e-05	2.72977e-05	3.04865e-05	7.9958e-06	0.000130178	7.78735e-06	0.000155803	8.22997e-06	7.43657e-05	4.64682e-05	8.46404e-06	8.01715e-06	7.83232e-06	0.000634158	8.15558e-06	7.94877e-06	7.5751e-05	2.83577e-05
25113			level4			376.099	267.5	NEG													2.79939e-05	8.89294e-06	8.20531e-06	0.000195589	8.45926e-06	7.27723e-06	3.69937e-05	8.36801e-06	0.000131913	8.6553e-06	8.53913e-06	9.74884e-05	3.38249e-05	7.38149e-05	7.9958e-06	0.000316069	7.78735e-06	0.000162316	3.67595e-05	0.000179846	6.83394e-05	3.97864e-05	0.000366147	7.83232e-06	0.000289263	8.15558e-06	0.000173168	8.51141e-06	8.48302e-06
25118			level4			578.275	267.5	NEG													7.90341e-06	8.89294e-06	8.20531e-06	1.27469e-05	3.99133e-05	3.71264e-05	8.24451e-06	0.000227462	3.69822e-05	0.000346719	8.53913e-06	8.28813e-06	5.94135e-05	8.43665e-06	7.9958e-06	0.000168841	2.29957e-05	0.000104258	8.22997e-06	3.93481e-05	5.85271e-05	8.46404e-06	2.96373e-05	7.83232e-06	0.000615954	8.15558e-06	7.94877e-06	0.000116652	2.80111e-05
25157			level4	17beta-Estradiol 3-sulfate-17-(beta-D-glucuronide)	-10.0713	527.557	266.8	NEG													5.30014e-05	8.89294e-06	8.20531e-06	1.27469e-05	8.45926e-06	7.27723e-06	8.24451e-06	2.62538e-05	8.21932e-06	8.6553e-06	8.53913e-06	3.96653e-05	2.28872e-05	8.43665e-06	7.9958e-06	0.000160596	7.78735e-06	0.000188009	2.80801e-05	3.30994e-05	3.27526e-05	8.46404e-06	0.000174101	7.83232e-06	0.000354052	8.15558e-06	3.03196e-05	8.51141e-06	5.91222e-05
25163			level4	TG(14:0/16:0/O-18:0)	-11.3737	792.34	266.7	NEG													0.000291988	8.89294e-06	8.20531e-06	1.27469e-05	8.45926e-06	7.27723e-06	6.19582e-05	0.000142597	3.19833e-05	4.7063e-05	8.53913e-06	0.000144772	7.9916e-05	0.000340255	7.9958e-06	0.000701108	5.00866e-05	0.000703753	8.22997e-06	0.00025326	0.000145954	5.94558e-05	0.000560852	8.88267e-05	0.0012161	8.15558e-06	0.00039922	3.03696e-05	0.000283678
25172			level4			526.888	266.6	NEG													0.000288697	3.31491e-05	0.000159082	1.27469e-05	8.45926e-06	8.56813e-05	0.000144583	0.000214749	0.000175926	0.000116168	4.59035e-05	0.000223233	0.000213428	0.000346532	0.000149207	0.000733232	0.000234421	0.000695094	0.000146641	0.000128739	0.000207784	0.000105431	0.000431899	0.000139653	0.00106624	6.4771e-05	0.000315689	0.000135889	0.000267218
25174			level4			791.337	266.6	NEG													0.00243472	0.000248543	0.000541427	1.27469e-05	0.000428386	5.12056e-05	0.000226021	0.000614058	0.000352436	0.000423156	0.000177484	0.00169673	0.000894368	0.00260745	0.000728331	0.00522442	0.000712908	0.00444503	0.000291705	0.00176601	0.00119386	0.000603212	0.00433166	0.000675754	0.00823952	8.15558e-06	0.00196814	0.000251648	0.00231038
25175			level4	Brilliant blue	-3.1827	791.839	266.6	NEG													0.000951166	9.96835e-05	0.00028673	1.27469e-05	0.00016588	7.27723e-06	0.000117318	0.000193158	0.000182007	0.000168513	8.53913e-06	0.000591811	0.000356636	0.00140674	0.000322312	0.0022419	0.00034671	0.00208172	0.000122128	0.000674129	0.000516855	0.000169817	0.00214791	0.000275283	0.00361898	8.15558e-06	0.000974568	3.60636e-05	0.00101395
25176			level4			801.827	266.6	NEG													0.000430173	8.89294e-06	0.00012535	1.27469e-05	8.45926e-06	7.27723e-06	8.24451e-06	0.000108705	3.86318e-05	4.92089e-05	4.28299e-05	0.00029586	5.13037e-05	0.000392443	9.74076e-05	0.000864442	0.000108198	0.000655945	8.22997e-06	0.000217758	0.000176605	8.46404e-06	0.000656983	0.000164184	0.00131135	8.15558e-06	0.000390883	8.51141e-06	0.000511211
25188			level4			790.836	266.5	NEG													0.00259891	0.000324662	0.000843234	0.000148163	0.000665566	0.000175372	0.000443785	0.000987113	0.000519093	0.000463173	0.000150689	0.00209617	0.00106766	0.00331838	0.000906916	0.00640706	0.000753553	0.00555429	0.000376092	0.00201659	0.00149082	0.000635385	0.0053948	0.000843526	0.00976324	8.15558e-06	0.00290858	0.000252571	0.00281196
25207			level4			802.328	266.3	NEG													0.000215236	8.89294e-06	8.48276e-05	1.27469e-05	8.45926e-06	7.27723e-06	8.24451e-06	4.15108e-05	4.68017e-05	4.27386e-05	8.53913e-06	0.000148505	0.000131412	0.000337829	3.85167e-05	0.000659618	8.14849e-05	0.000558184	8.22997e-06	0.000103449	0.000127625	8.46404e-06	0.000477952	9.90514e-05	0.000964526	8.15558e-06	0.000360194	8.51141e-06	0.00025818
25213			level4			802.829	266.2	NEG													0.000145422	8.89294e-06	8.20531e-06	1.27469e-05	8.45926e-06	7.27723e-06	8.24451e-06	3.56677e-05	8.21932e-06	8.6553e-06	8.53913e-06	2.93362e-05	6.89328e-05	0.00014181	7.9958e-06	0.0002162	7.78735e-06	0.000210842	3.85245e-05	0.000121845	5.51802e-05	8.46404e-06	0.000262807	2.90493e-05	0.000469958	8.15558e-06	9.78343e-05	8.51141e-06	0.000167928
25214			level4			812.817	266.2	NEG													0.000101097	8.89294e-06	8.20531e-06	1.27469e-05	8.45926e-06	7.27723e-06	8.24451e-06	2.85062e-05	8.21932e-06	8.6553e-06	8.53913e-06	8.39053e-05	3.7078e-05	0.00018559	7.9958e-06	0.000305631	7.78735e-06	0.000208672	8.22997e-06	3.83655e-05	5.46049e-05	8.46404e-06	0.000212687	3.49884e-05	0.000444312	8.15558e-06	0.000233336	8.51141e-06	0.000171059
25236			level4			646.307	265.6	NEG													0.000193191	0.000294226	0.000245788	0.000149226	0.000146341	0.000178689	4.803e-05	0.000117847	0.000364488	0.000138118	0.000359278	0.000568749	9.19179e-05	0.000706955	2.82891e-05	0.000391628	7.78735e-06	0.00084244	0.00012651	0.000543699	0.00027716	0.000141211	0.000450675	0.000318413	0.000548833	8.15558e-06	0.000536588	0.00103033	0.00019292
25237			level4	Sepiolite	-22.2642	646.809	265.6	NEG													0.000114185	0.00018619	0.000328708	1.27469e-05	0.000173196	0.000136824	2.47443e-05	0.000106135	0.00028561	2.95779e-05	0.00024263	0.00030641	5.70742e-05	0.000315531	0.00010365	0.000216007	0.000127389	0.000547323	7.41423e-05	0.000353196	0.000187063	0.000104501	0.00026511	0.000212881	0.000526496	7.03972e-05	0.000154748	0.0005623	9.80281e-05
25243			level4			278.001	265.3	NEG													0.0107128	0.0121064	0.0112949	0.00237318	0.00711117	0.00355504	0.012301	0.0137309	0.00926047	0.0262031	0.0049185	0.0109741	0.00966475	0.0104611	0.0161115	0.0162038	0.00889013	0.0204745	0.0135789	0.0190322	0.0119479	0.0203016	0.0151855	0.00928295	0.0168448	0.0189429	0.00735669	0.0243224	0.0198112
25248			level4			431.19	265.2	NEG													0.00020294	4.63507e-05	3.4221e-05	0.000121205	8.45926e-06	7.13375e-05	2.99419e-05	0.000195231	0.000309519	0.00022729	0.000282377	0.000189948	0.000545349	9.74827e-05	7.9958e-06	0.000462346	7.78735e-06	0.000296505	5.1944e-05	0.000142692	0.000166546	8.46404e-06	0.00154557	0.000150345	0.000167814	8.15558e-06	0.000262386	0.00025794	8.48302e-06
25302			level4			793.863	263.4	NEG													0.000204971	8.89294e-06	8.20531e-06	1.27469e-05	0.000115088	7.27723e-06	8.24451e-06	4.9095e-05	8.21932e-06	6.56689e-05	8.53913e-06	0.000530545	0.000272152	0.000474001	0.00033941	0.00124254	7.78735e-06	0.000310945	8.22997e-06	0.000442569	0.000206256	8.46404e-06	0.000177768	0.000310561	0.00326551	8.15558e-06	7.94877e-06	8.51141e-06	0.000220403
25324			level4			793.362	262.5	NEG													0.000643292	8.89294e-06	0.000112416	1.27469e-05	0.000137239	7.27723e-06	0.00046826	0.000126179	6.75097e-05	0.000414987	8.53913e-06	0.000907036	0.000430278	0.00164539	0.000382429	0.00287491	4.01124e-05	0.000624069	3.28166e-05	0.00201325	0.000547882	8.46404e-06	0.000783148	0.000745248	0.00568527	8.15558e-06	0.000194823	8.51141e-06	0.000709899
25373			level4			450.198	260.1	NEG													0.000200075	8.89294e-06	8.20531e-06	1.27469e-05	4.19014e-05	9.8182e-05	5.46712e-05	0.000203881	8.71172e-05	8.37008e-05	0.000217509	0.00032042	0.000221344	9.61859e-05	7.9958e-06	0.000209568	2.18352e-05	0.000140594	0.00018031	0.000222931	0.000121903	6.65078e-05	0.000951075	7.83232e-06	0.00069515	3.39314e-05	0.000244295	0.00100304	0.000104608
25395			level4	TG(14:0/16:1(9Z)/O-18:0)	13.8709	790.344	259.3	NEG													0.00137296	0.000164173	0.000361294	0.00017844	0.000215027	8.72043e-05	0.000110919	0.000306928	0.000240833	0.000161471	0.000114682	0.000878919	0.000577466	0.00136862	0.000348692	0.00289946	0.0003626	0.00215342	0.000200585	0.000696621	0.000640016	0.000328042	0.00251315	0.000421472	0.00510335	8.91372e-05	0.000647693	8.25712e-05	0.00169343
25396			level4			790.845	259.3	NEG													0.000946183	8.89294e-06	0.000403678	1.27469e-05	0.000230892	7.27723e-06	0.000142191	0.000248841	0.00014295	0.000183983	5.29766e-05	0.000738202	0.000278832	0.00101352	0.00025582	0.00222638	0.000359245	0.00184852	0.000216436	0.000521124	0.000491934	0.000170848	0.00176689	0.000199467	0.00437597	6.99479e-05	0.000696972	3.19737e-05	0.00126668
25397			level4			791.346	259.3	NEG													0.000400829	8.89294e-06	0.000141084	1.27469e-05	5.8996e-05	7.27723e-06	8.24451e-06	0.000102107	3.50231e-05	7.86919e-05	8.53913e-06	0.000351515	0.000176796	0.000499442	0.000105165	0.00101092	0.000104462	0.000796203	3.83803e-05	0.000173505	0.000205941	6.09673e-05	0.000817779	0.000145332	0.00183202	4.54527e-05	0.000213759	8.51141e-06	0.000621714
25399			level4	Brilliant blue	8.54716	791.848	259.2	NEG													8.52303e-05	8.89294e-06	8.20531e-06	1.27469e-05	8.45926e-06	7.27723e-06	8.24451e-06	3.25711e-05	8.21932e-06	3.2077e-05	8.53913e-06	8.28813e-06	4.86006e-05	0.000146181	7.9958e-06	0.00023433	7.78735e-06	0.000131752	3.6451e-05	4.91921e-05	4.45521e-05	8.46404e-06	0.000251476	7.83232e-06	0.000673151	8.15558e-06	7.94877e-06	8.51141e-06	6.67582e-05
25423			level4			637.707	258.2	NEG													0.00023232	8.89294e-06	0.000185818	1.27469e-05	0.000138816	7.27723e-06	0.000140842	0.000400417	8.9463e-05	8.6553e-06	8.53913e-06	0.000650516	0.00025363	0.000645562	0.000437158	0.00119881	0.000128756	0.0010211	8.22997e-06	0.000399814	0.000298868	9.87552e-05	0.000979853	0.000576848	0.00376558	8.15558e-06	0.000432749	6.71184e-05	0.00181135
25425			level4			648.698	258.2	NEG													0.00012415	8.89294e-06	4.71356e-05	1.27469e-05	0.000113486	7.27723e-06	3.67006e-05	0.000113892	8.21932e-06	2.41093e-05	3.36753e-05	0.00015941	8.92127e-05	0.000213121	0.00011711	0.000579993	2.9587e-05	0.000331381	2.52818e-05	0.000178843	0.000112711	8.46404e-06	0.000254767	0.000219954	0.0015412	8.15558e-06	0.000131067	7.96896e-05	0.000865391
25444			level4	Etacozole	-23.2283	327.179	257.9	NEG													0.0010827	0.000279627	0.000131359	0.00102694	0.000298393	0.000192896	0.00111908	0.00040736	0.0012459	0.000237859	0.000446055	0.00171638	0.0013135	0.000699451	0.000116174	0.000491433	0.000148632	0.000445294	0.000311635	0.000216541	0.00059636	0.0010304	0.00103811	0.000266936	0.000541253	0.000195084	0.000465133	0.00133727	0.00020301
25450			level4	Sodium copper chlorophyllin	-17.2035	657.184	257.9	NEG													7.90341e-06	8.89294e-06	8.20531e-06	1.27469e-05	8.45926e-06	7.64775e-05	8.24451e-06	8.36801e-06	8.21932e-06	8.6553e-06	8.53913e-06	0.000157208	2.76847e-05	3.83921e-05	7.9958e-06	0.000140628	7.78735e-06	0.000122543	8.22997e-06	4.2151e-05	3.58666e-05	8.46404e-06	0.000496967	8.41739e-05	0.000839827	8.15558e-06	7.12268e-05	4.8202e-05	0.00026479
25452			level4			260.125	257.8	NEG													0.00160079	0.000342361	0.000354961	0.000463597	0.000664359	0.000171358	0.000265554	0.000319446	0.000335945	0.000523249	0.000530377	0.000833846	0.00104178	0.000853123	0.000679731	0.00341465	0.000146935	0.0026448	0.000716414	0.00140797	0.000865563	0.000498603	0.00854153	0.000365637	0.00166303	0.000577639	0.000817017	0.000728779	0.000564016
25454			level4			659.689	257.8	NEG													7.90341e-06	8.89294e-06	8.20531e-06	1.27469e-05	8.45926e-06	7.27723e-06	8.24451e-06	9.80516e-05	8.21932e-06	8.6553e-06	8.53913e-06	3.61489e-05	8.05552e-06	4.25127e-05	7.9958e-06	0.000303871	7.78735e-06	0.000145461	8.22997e-06	6.94921e-05	4.07375e-05	8.46404e-06	4.8481e-05	3.4576e-05	0.000725767	8.15558e-06	7.94877e-06	3.71311e-05	0.000406294
25486			level4	4-(N-Maleimido)benzyltrimethylammonium iodide	-1.13756	371.194	256.9	NEG													0.000256104	3.13428e-05	8.20531e-06	1.27469e-05	8.45926e-06	2.89536e-05	8.24451e-06	2.35607e-05	8.14952e-05	0.000195757	5.08171e-05	8.28813e-06	2.2072e-05	0.000262024	7.9958e-06	0.000743577	4.65376e-05	0.000654952	0.000279798	0.000115807	0.000142337	8.46404e-06	0.00259537	2.91752e-05	0.000413279	0.000403098	5.95796e-05	0.00140659	8.48302e-06
25513			level4			897.414	255.7	NEG													0.00017556	8.89294e-06	4.27835e-05	1.27469e-05	3.84628e-05	7.27723e-06	8.24451e-06	0.000122044	2.76249e-05	8.6553e-06	8.53913e-06	0.000287053	8.05552e-06	0.000252486	8.36697e-05	0.000604193	6.39079e-05	0.000335678	8.22997e-06	0.000225335	0.000116472	3.11826e-05	0.000355427	7.83232e-06	0.000482144	8.15558e-06	0.000362573	8.51141e-06	0.000317454
25523			level4	Citrusin IV	-21.8538	896.913	255.4	NEG													0.000173373	8.89294e-06	4.70651e-05	1.27469e-05	3.62289e-05	7.27723e-06	8.24451e-06	9.71962e-05	8.21932e-06	0.000115311	8.53913e-06	0.000312933	0.000106404	0.000221614	8.788e-05	0.000674267	6.52684e-05	0.000314403	8.22997e-06	0.0002036	0.000125885	8.46404e-06	0.000358308	3.76735e-05	0.000478762	8.15558e-06	0.000345339	8.51141e-06	0.000209326
25548			level4	N-(3,4-Dichlorophenyl)-malomate	5.95252	247.057	254.7	NEG													0.00046008	0.000987267	0.000316201	0.00113618	0.000369737	0.000593751	0.000423122	0.000452746	0.000874331	0.000431207	0.00031358	0.00111932	0.000433598	0.000455328	0.000333711	0.000802478	0.000375726	0.000698052	0.000614585	0.00043733	0.000581417	0.000711686	0.00208254	0.00049852	0.00140973	0.000589647	0.000592143	0.000232692	0.000312455
25555			level4			230.126	254.5	NEG													0.00063461	0.00158633	0.000302555	0.000452801	0.000583201	0.000487867	0.000134681	0.000276847	0.000469871	0.000249695	0.000649685	0.000651919	0.000819577	0.0010419	0.00013691	0.000808346	0.000206392	0.00041593	0.000479617	0.000175833	0.000528228	0.00040659	0.00370019	0.000200527	0.00103283	0.000507232	0.000705431	0.00086192	0.000460553
25566			level4	Diclosulam	5.60436	405.215	254.1	NEG													0.0020543	0.000501838	0.000155214	0.000139148	5.88247e-05	0.000266047	0.00016099	0.000188337	0.00158952	0.00162531	0.000524602	0.000687623	0.000298768	0.000387713	0.000282975	0.0028467	0.000128795	0.000896266	0.000160757	0.00143282	0.000719328	0.00025392	0.00733179	0.00079467	0.00246742	5.43581e-05	0.000889748	0.00105286	3.36238e-05
25568			level4			406.218	254	NEG													0.00031093	8.89294e-06	8.20531e-06	1.27469e-05	8.45926e-06	7.27723e-06	8.24451e-06	8.36801e-06	0.000260268	0.000317195	6.31341e-05	5.765e-05	8.05552e-06	8.43665e-06	7.9958e-06	0.000429787	2.03985e-05	8.6964e-05	8.22997e-06	0.000281751	9.61495e-05	8.46404e-06	0.00146026	5.70212e-05	0.000425647	8.15558e-06	0.0001462	0.000180981	8.48302e-06
25570			level4			653.291	253.9	NEG													0.000339097	0.000152343	0.000226342	0.000109148	0.000171697	0.00025856	6.00215e-05	0.000475827	0.000362696	0.000505051	0.000595773	0.000272535	0.000254659	0.000352612	4.47579e-05	0.000326842	2.83586e-05	0.000879841	0.000233862	0.00118453	0.000341728	8.46404e-06	0.00745014	0.000129074	0.00340851	9.04598e-05	0.000192006	0.000501256	2.51788e-05
25571			level4			654.294	253.9	NEG													3.22081e-05	8.89294e-06	3.12953e-05	1.27469e-05	5.37009e-05	7.27723e-06	8.24451e-06	6.53184e-05	0.000142845	5.36589e-05	0.00011692	3.79498e-05	8.31642e-05	3.49725e-05	2.76012e-05	3.93509e-05	2.6206e-05	0.000221196	3.16583e-05	0.000250093	6.4265e-05	8.46404e-06	0.00224723	7.83232e-06	0.00107153	8.15558e-06	7.94877e-06	0.000132689	0.0001245
25642			level4			671.766	249.8	NEG													7.90341e-06	8.89294e-06	6.06771e-05	1.27469e-05	8.45926e-06	7.27723e-06	3.09408e-05	8.46084e-05	8.21932e-06	8.6553e-06	8.53913e-06	0.000225019	8.05552e-06	0.000117521	3.46678e-05	0.000123281	7.78735e-06	0.000246352	3.35463e-05	9.39233e-05	5.68537e-05	2.93426e-05	0.000194157	7.83232e-06	0.000522959	8.15558e-06	7.94877e-06	8.51141e-06	0.000309752
25762			level4			406.158	245.3	NEG													0.000570867	0.000111566	5.89313e-05	1.27469e-05	2.36573e-05	9.59405e-05	2.37898e-05	5.21794e-05	0.000117842	0.000233082	8.53913e-06	8.57398e-05	5.00834e-05	8.43665e-06	7.9958e-06	0.000757571	7.78735e-06	8.70338e-06	3.44373e-05	0.000312852	0.000129137	8.46404e-06	0.00120548	3.97317e-05	0.000601654	8.15558e-06	7.94877e-06	0.000283564	2.90182e-05
25776			level4			331.174	244.8	NEG													0.000833394	0.000193616	6.47616e-05	0.000663059	0.000336673	0.00020473	0.000386501	0.00176799	0.00211343	0.000892559	0.000423824	0.000425028	0.00296734	0.000875641	3.0074e-05	0.000347074	0.000126759	0.000845367	0.000807795	0.000286426	0.000729602	0.000282191	0.00677711	7.83232e-06	0.0037521	0.000154032	0.00019937	0.00436127	0.00013153
25853			level4	Cycloguanil hydrochloride	12.4112	287.173	242.2	NEG													0.00035786	8.1889e-05	8.20531e-06	1.27469e-05	8.45926e-06	7.27723e-06	0.000111279	0.000273047	9.99012e-05	4.81884e-05	8.53913e-06	0.000402714	2.15703e-05	6.10429e-05	7.9958e-06	0.00070315	7.78735e-06	0.000516281	2.2985e-05	0.000160344	0.000146063	3.17821e-05	0.00201313	0.000127105	0.000476658	6.90241e-05	6.85285e-05	0.000113269	8.48302e-06
25858			level4	Moxifloxacin hydrochloride	15.4755	436.892	242.2	NEG													0.000948716	0.00113072	0.00107344	0.000295742	0.000900617	0.000482954	0.00109722	0.0013344	0.00163	0.00135044	0.00131065	0.00145759	0.00143753	0.00094445	0.0013754	0.000756198	0.00110692	0.000923668	0.00125292	0.000889604	0.00108496	0.000971628	0.000843093	0.000936353	0.000795103	0.000307071	0.00126944	0.000765945	0.000830777
25877			level4			274.878	241.7	NEG													0.000346236	0.000572903	0.00048559	0.000338374	0.000385716	0.000532409	0.000579918	0.000479827	0.00041561	0.000452054	0.000316368	0.000490192	0.000489005	0.000542328	0.000661639	0.000317038	0.00073299	0.000435781	0.000635642	0.000394679	0.000480215	0.000415006	0.000310036	0.000387748	0.000331122	0.000552806	0.000414566	0.000520294	0.000540033
25895			level4			293.991	241.5	NEG													0.000393295	0.000603502	0.000296981	1.27469e-05	0.000270348	0.00067112	0.000268865	0.000486197	0.000545265	0.000709323	0.000593743	0.000142643	0.000266324	0.000351234	0.000344389	0.000357093	0.000721985	0.000169651	0.000443015	0.000192392	0.000392006	0.000302266	0.000402579	0.000459807	0.000177205	0.0014307	0.000302908	0.000509404	0.000412849
25913			level4			240.871	241.4	NEG													0.0055421	0.00431227	0.0012288	0.00144263	0.00119448	0.00222334	0.00168552	0.00126481	0.00117125	0.00416921	0.000938018	0.000756295	0.002383	0.00145168	0.00109834	0.00353878	0.00149625	0.00122997	0.00177509	0.00149817	0.00202	0.00130844	0.00200801	0.00618365	0.0013826	0.00221489	0.00240452	0.00687551	0.00502999
25951			level4			330.997	240.7	NEG													0.000700709	0.000739939	0.000692907	0.000539215	0.00103877	0.00108317	0.000859765	0.000957704	0.00103606	0.00120868	0.000732773	0.000546383	0.000825329	0.000707192	0.00104217	0.000776121	0.000797168	0.00144422	0.000672864	0.00162299	0.000901206	0.000991465	0.0013206	0.000694683	0.00109355	0.00171947	0.00100918	0.00212419	0.00088013
25983			level4	Sibutramine	11.7085	278.844	239.8	NEG													0.0011738	0.00142724	0.00118591	0.00083918	0.00143983	0.000804001	0.00158773	0.00155479	0.00167468	0.001709	0.00165088	0.00149208	0.00118784	0.000878718	0.00139984	0.00122832	0.00173602	0.00115417	0.00145762	0.00129868	0.00134402	0.000963219	0.000994397	0.00145449	0.000849937	0.000912172	0.00136157	0.00117437	0.000894932
26012			level4			392.785	239.2	NEG													0.000570181	0.000394517	0.000799129	0.000204295	0.000920472	4.02998e-05	0.0010036	0.000559861	0.000568612	0.000274606	0.000700478	0.000640428	0.000556609	0.000467074	0.000507306	8.63049e-06	0.00030192	0.000664447	0.000420818	0.000624349	0.000511382	0.000323877	0.000287065	0.00036301	0.000489571	0.000113833	0.000651415	0.000294068	8.48761e-05
26026			level4			97.9594	239.1	NEG													0.00569206	0.00451553	0.00605435	0.00394879	0.00629693	0.00701107	0.0061598	0.00948519	0.00551113	0.00713794	0.00401001	0.00669148	0.00521228	0.00527628	0.00748281	0.00587796	0.00437232	0.00672214	0.00315715	0.0052484	0.00579318	0.00874481	0.00734298	0.00752756	0.00554342	0.00668141	0.00772949	0.007691	0.00449679
26047			level4			312.881	239.1	NEG													0.000646034	0.000970275	0.000607386	0.000472481	0.000615533	0.000756718	0.000664465	0.000787841	0.000809102	0.0011456	0.000586291	0.000863141	0.000852489	0.00085196	0.00103447	0.00133328	0.000569503	0.000857568	0.000617508	0.00063253	0.000783709	0.000459059	0.000898408	0.000818064	0.000671054	0.00204484	0.000624438	0.000858789	0.000808162
26080			level4			532.72	239.1	NEG													0.00107145	0.00125107	0.00166785	0.000470171	0.00147381	0.00065959	0.00176372	0.00134811	0.00147885	0.00128966	0.0020054	0.00187425	0.00139775	0.0010392	0.0017715	0.00110049	0.00167754	0.00144013	0.00160774	0.00149697	0.00139426	0.00145717	0.000825077	0.00168669	0.00105324	0.000514318	0.00170937	0.000632046	0.00115666
26086			level4	PC(2:0/20:5(7Z,9Z,11E,13E,17Z)-3OH(5,6,15))	-8.5854	630.687	239.1	NEG													0.00163583	0.00216581	0.00172216	0.00101333	0.00221824	0.000608855	0.00254147	0.00187024	0.00147061	0.00162468	0.00244446	0.00235417	0.00198794	0.00152325	0.00185387	0.000944353	0.0022733	0.00213183	0.00211914	0.00182334	0.00181634	0.00182548	0.00103597	0.0018026	0.00123874	0.000580287	0.00182938	0.00111568	0.00141461
26106			level4			750.636	238.7	NEG													0.000739115	0.00111014	0.000617096	0.000302576	0.00105367	0.000269276	0.00110769	0.00086789	0.00090521	0.000895566	0.0012841	0.000866393	0.0010307	0.000590699	0.00120599	0.000553707	0.0012048	0.000612149	0.000919296	0.000722121	0.000842909	0.000788418	0.000325216	0.0008595	0.000752499	0.000395786	0.000612204	0.000689465	0.00105478
26122			level4	Golvatinib	-15.5016	632.684	238.5	NEG													0.000679852	0.00079518	0.000820965	0.000191242	0.000825345	0.000293689	0.000962372	0.000675492	0.000662542	0.000759435	0.000812221	0.000939406	0.000782969	0.000457483	0.000855527	0.000352325	0.000938098	0.000684081	0.000640768	0.000673042	0.000690102	0.000720643	0.000269501	0.000734609	0.000421122	0.000190173	0.000812994	0.00049077	0.000542413
26194			level4			280.021	235.2	NEG													0.000207082	0.000230087	0.00037778	0.000427704	0.00023269	0.000131789	0.000476142	0.000351733	0.000122445	0.00028763	0.000350153	0.000479105	0.000155748	0.00016255	0.000220695	0.000142858	0.000307091	0.000127158	0.000158992	0.000352571	0.0002651	0.000790504	0.000636008	0.000244913	0.000800434	0.000794772	0.000768528	0.000286324	0.000290443
26212			level4			296.087	234.5	NEG													0.000604228	0.000213491	0.000265322	6.87642e-05	0.000197478	0.000412246	0.000107425	0.000124388	0.000213959	0.000196905	0.000184745	6.71239e-05	0.000332271	0.000299838	0.000123338	0.000760854	8.39264e-05	0.000426305	0.000169879	0.000386448	0.000261947	9.15584e-05	0.00163014	0.0001335	0.000660595	5.386e-05	0.00021164	0.000466289	0.00024634
26282			level4			233.078	233	NEG													0.00102553	0.00121649	0.000199225	0.00174433	0.000980738	0.00135263	0.000481158	0.00147553	0.000214677	0.000637226	0.000207072	0.000285513	0.000306288	0.000375897	0.00119652	0.00135985	0.000567541	0.00143605	0.000244097	0.000721336	0.000801385	0.00121341	0.00205827	0.000676538	0.000859124	0.00100254	0.000244394	0.000217149	0.00131045
26302			level4			461.942	232.9	NEG													0.000312044	0.000268453	0.000639851	1.27469e-05	0.000475546	0.000179431	0.000658542	0.000685745	0.000644269	0.000276639	0.000536053	0.000495123	0.000455688	0.000460854	0.000605302	3.03467e-05	0.000586665	0.000516214	0.000389384	0.000525953	0.000437742	0.00048943	0.000181402	0.000395969	0.000365796	0.000120904	0.000243061	0.000249204	8.48302e-06
26362			level4			449.252	232.5	NEG													0.000161937	8.89294e-06	8.20531e-06	1.27469e-05	0.000221294	7.27723e-06	0.000124069	8.36801e-06	6.76069e-05	8.6553e-06	8.53913e-06	0.000538369	0.000452255	0.000746373	0.000196071	4.15422e-05	7.78735e-06	8.70338e-06	8.22997e-06	8.15532e-06	0.000132254	8.46404e-06	0.000165645	0.000221721	0.0020492	8.15558e-06	0.000144483	2.69266e-05	8.48302e-06
26420			level4			458.967	231.4	NEG													0.0043039	0.00470776	0.00624402	0.00117079	0.00490155	0.00181947	0.00588118	0.0202145	0.00556616	0.00443464	0.00747155	0.0117121	0.00762691	0.00432934	0.0101274	0.00280835	0.00555868	0.00521947	0.00865252	0.00846003	0.00656051	0.00481608	0.0046408	0.00739444	0.00671365	0.00122166	0.00559854	0.00278668	0.00367071
26443			level4			471.174	230.4	NEG													0.00036691	0.000127167	7.21064e-05	1.27469e-05	2.78687e-05	0.000179458	0.000709369	0.000108025	0.00015971	4.86144e-05	0.000114167	0.000807723	0.000242271	0.000499005	3.63958e-05	0.000587748	0.000282327	0.00051894	0.000288285	0.000243943	0.000271639	0.00134689	0.000875785	0.000149013	0.000347573	0.000101434	0.000347571	0.00031314	0.000102569
26492			level4			1081.83	227	NEG													0.00021347	8.89294e-06	5.44474e-05	1.27469e-05	0.000128097	7.27723e-06	8.24451e-06	8.36801e-06	8.21932e-06	8.6553e-06	5.26967e-05	0.000210942	0.000332085	0.000299062	7.66443e-05	0.00094072	7.78735e-06	0.00101968	4.79797e-05	0.000272092	0.000185905	4.80457e-05	0.00126522	0.000426845	0.000863403	8.15558e-06	7.94877e-06	0.000156555	0.000614606
26493			level4			1082.16	227	NEG													0.000189684	8.89294e-06	6.12329e-05	1.27469e-05	8.45926e-06	7.27723e-06	8.24451e-06	8.36801e-06	0.000117881	8.6553e-06	8.53913e-06	6.68284e-05	0.000223936	0.000265236	8.54243e-05	0.000880988	7.78735e-06	0.000758619	8.22997e-06	0.000187159	0.000146209	5.89517e-05	0.00106947	0.000586522	0.000563184	8.15558e-06	4.56042e-05	8.51141e-06	0.000611922
26503			level4			418.112	226.5	NEG													0.00039392	0.000509897	0.00057712	0.000390396	0.000428168	3.77146e-05	8.24451e-06	9.625e-05	8.21932e-06	0.000465504	3.5656e-05	8.28813e-06	8.05552e-06	0.000838408	7.9958e-06	0.000718064	7.78735e-06	0.000174026	3.07879e-05	0.000703096	0.00027238	0.00169924	0.00337181	7.83232e-06	0.000783647	8.18273e-05	2.75341e-05	0.000405993	8.48302e-06
26511			level4			397.986	226.4	NEG													0.00106748	0.00052641	0.000835528	1.27469e-05	0.0019617	0.00110962	0.00229274	0.00130178	0.0013441	0.000894334	0.00129846	0.000548796	0.000809203	0.000851909	0.00187368	0.000473119	0.00169383	0.001136	0.000880552	0.00118544	0.00110487	0.000911577	0.00159802	0.000787408	0.00128002	0.00494925	0.00238192	0.0019978	0.00151118
26534			level4			294	226	NEG													0.00122351	0.000731135	0.00148523	1.27469e-05	0.00281369	0.000981316	0.00218412	0.00149121	0.00151863	0.00145497	0.00131304	0.000599717	0.00106601	0.0013838	0.00194433	0.000514012	0.00133095	0.00175209	0.00119208	0.00232248	0.00136575	0.0017965	0.00187858	0.000520955	0.00347879	0.00767282	0.000970993	0.0026718	0.00133704
26535			level4			314.003	226	NEG													0.000310868	0.000265091	0.000343609	1.27469e-05	0.000385631	0.000393148	0.000257968	0.000501626	0.000417566	0.000216229	0.000194775	0.000134317	0.000391406	0.000319568	0.000390893	0.000170059	0.000415297	0.000339459	0.000514252	0.00016886	0.000307168	0.000203237	0.000170166	0.000370021	0.000371035	0.00173367	0.000225625	0.000987084	0.000613285
26544			level4			496.038	226	NEG													0.000998853	0.000709671	0.00110816	0.000195623	0.00134217	0.00131037	0.00135495	0.0014195	0.00128085	0.000765271	0.000990703	0.000671396	0.00128855	0.00140354	0.0012765	0.00190704	0.00175298	0.000806368	0.00187773	0.00100711	0.00117337	0.00112557	0.000586039	0.00113623	0.000950607	0.00412012	0.00101511	0.00328819	0.00119209
26556			level4			305.997	225.9	NEG													0.000460585	0.00108581	0.00053217	0.000501084	0.000725059	0.000158783	0.000813096	0.000780324	0.000707662	0.00154303	0.000808324	0.0006451	0.00173608	0.000877354	0.0012199	0.000747429	0.000149193	0.000678187	0.000540937	0.00061601	0.000766306	0.00123604	0.000494702	0.000282268	0.000557448	0.000510402	0.000852491	0.00217022	0.00182343
26568			level4			414.035	225.9	NEG													0.00127979	0.00096877	0.00150835	0.00127215	0.00191635	0.00143739	0.001797	0.00217885	0.00165644	0.00123732	0.00155609	0.00125697	0.00221466	0.00167922	0.00156565	0.0022208	0.00191128	0.00120665	0.00190637	0.00166007	0.00162151	0.00180429	0.00110577	0.00126675	0.00159891	0.0066814	0.00147233	0.00506247	0.00143512
26590			level4			332.033	225.8	NEG													0.00152763	0.00104255	0.00201495	0.00386233	0.00231944	0.00187176	0.0024336	0.00274294	0.00196762	0.0014489	0.00218738	0.00171235	0.00359055	0.00247547	0.00201804	0.00415837	0.00210818	0.00148341	0.00210988	0.00218995	0.00226326	0.00282887	0.00127427	0.0016332	0.00209587	0.00768033	0.00212589	0.00891617	0.00173792
26595			level4			388	225.8	NEG													0.000749269	0.00103633	0.000808982	0.000522495	0.000506729	0.000381371	0.000947089	0.00106425	0.000859478	0.00028678	0.000882046	0.00107572	0.00216072	0.00086693	0.000556736	0.00121336	0.00039395	0.000288169	0.00110517	0.000586296	0.000814594	0.00117082	0.000636955	0.000658611	0.000789097	0.000785677	0.000996954	0.00332182	0.000336607
26597			level4			454.029	225.8	NEG													0.000247264	0.000175979	0.000433076	1.27469e-05	0.000405152	0.000962851	0.000304585	0.000838388	0.000716604	0.000518696	0.00049205	0.000614467	0.00105267	0.000641435	0.000516018	0.00239952	0.000678497	0.000247447	0.000702158	0.00015545	0.000605753	0.000397269	0.000412423	0.00063947	0.000708162	0.00224243	0.000378928	0.00320225	0.000951393
26604			level4			535.976	225.8	NEG													0.000465392	0.000178225	0.000256086	1.27469e-05	0.000254372	0.000411608	0.000478572	0.00061215	0.000461458	0.000515343	0.000658218	0.000526473	0.000876873	0.000334705	0.000446835	0.000619806	0.000622043	0.000211003	0.000665254	0.000300661	0.000445391	0.000530513	0.000224046	0.000250871	0.000364257	0.000493284	0.000480985	0.00181116	0.000714341
26618			level4			255.041	225.7	NEG													0.0012089	0.000797321	0.000758632	1.27469e-05	0.00111455	0.00123245	0.00111394	0.00139202	0.00110597	0.000890325	0.00103473	0.000745544	0.00105409	0.000870386	0.00124712	0.000621706	0.00141675	0.000804413	0.00118328	0.00106119	0.000983303	0.00113254	0.00101887	0.000930601	0.00116487	0.00263884	0.000913025	0.00173393	0.00121583
26620			level4			280.006	225.7	NEG													0.000602895	0.000348122	0.000251487	1.27469e-05	0.000663306	0.000809781	0.000540612	0.000859038	0.000585366	0.000222105	0.000667518	0.000434966	0.000552836	0.000455394	0.000779483	0.000375875	0.000895833	0.000398565	0.000741916	0.000412078	0.000530496	0.000571227	0.000354145	0.000675398	0.000745379	0.00136824	0.000491517	0.00105941	0.00109436
26623			level4			296.037	225.7	NEG													0.00614135	0.00611144	0.00295618	0.00225292	0.00635486	0.00865487	0.00498087	0.0085461	0.00654574	0.00616303	0.00575397	0.00478924	0.00595995	0.00497301	0.00774358	0.00596759	0.00859993	0.00584337	0.00731936	0.00449106	0.00600742	0.00487933	0.00574713	0.00617218	0.00702645	0.0135533	0.00464301	0.0104929	0.00970552
26626			level4	Perflexane	22.1172	337.044	225.7	NEG													0.000317752	0.000236477	0.000302352	1.27469e-05	0.00045093	0.000477023	0.000248343	0.00043466	0.000502025	0.000461376	0.00034703	0.000207119	0.000307745	0.000275043	0.000571674	0.000178923	0.000514826	0.00026733	0.000433536	0.000242172	0.000339454	0.000185385	0.000325932	0.000366853	0.000441367	0.00112771	0.000299927	0.000614729	0.000653627
26636			level4			371.073	225.7	NEG													0.00430731	0.00255339	0.00279851	0.000624069	0.0053244	0.00457076	0.00436786	0.00539075	0.00447998	0.00276226	0.00384141	0.00198217	0.00347323	0.00388502	0.00469696	0.00142855	0.00449829	0.00364181	0.00376791	0.00452682	0.00364607	0.00428785	0.00311264	0.00260247	0.00495839	0.0193756	0.00327539	0.00756977	0.004333
26653			level4			447.062	225.7	NEG													0.000304119	0.000202119	0.00026322	0.0010744	0.000344282	0.000372835	0.000435797	0.000637981	0.000336005	0.000128967	0.000405437	0.000252453	0.000700485	0.000427646	0.000365838	0.000515472	0.000288991	0.000132547	0.00044691	0.00031033	0.000397292	0.000533821	0.000274583	0.000268202	0.000405567	0.00221581	0.000339467	0.0027378	0.000191233
26654			level4			453.973	225.7	NEG													0.000464775	0.000129804	0.000309343	1.27469e-05	0.000203936	0.000234203	0.000502514	0.000846274	0.000611324	0.000473726	0.000703368	0.000742604	0.00150591	0.0005358	0.000322774	0.00086827	0.000646623	0.000217282	0.000725196	0.000304921	0.00051807	0.000627904	0.000415075	0.000650451	0.000493969	0.0017058	0.000653441	0.00214173	0.000335185
26669			level4			503.028	225.7	NEG													0.000225814	0.000237319	0.000177733	1.27469e-05	0.000193926	0.000487386	0.000287555	0.000378769	0.000214148	0.000546441	0.000322788	0.000402703	0.000670792	0.000241112	0.00023365	0.000410132	0.000553191	0.000194063	0.000274532	0.000310862	0.000318783	0.000395963	0.000326204	0.000391142	0.000276914	0.000454685	0.000281082	0.00128601	0.000598183
26674			level4			529.063	225.7	NEG													0.000192346	4.8301e-05	0.000205311	1.27469e-05	0.000337966	0.000356164	0.000241343	0.000401806	0.000298741	0.000105234	0.0002558	6.51715e-05	0.000356227	0.000326691	0.000264607	0.000359173	0.000266118	9.31255e-05	0.000390077	0.000215786	0.000239637	0.00033187	0.000125752	8.44853e-05	0.00021494	0.00166143	0.000212389	0.00143032	0.000208202
26709			level4	Pamidrote	2.02749	234.063	225.6	NEG													0.00581356	0.0052317	0.00545857	0.00481882	0.00732749	0.00662868	0.00720621	0.00694056	0.00672734	0.00599359	0.00584906	0.00480815	0.00579811	0.00579964	0.00704168	0.00560995	0.00634794	0.00633403	0.00650618	0.00671109	0.00614762	0.00680996	0.00595691	0.00478303	0.00679083	0.0136255	0.00594614	0.00868991	0.00656426
26716			level4			370.07	225.6	NEG													0.000315953	0.000148892	0.000173385	1.27469e-05	0.000240312	0.000373936	0.00028673	0.000395345	0.000342818	0.000228648	0.000256237	0.000149426	0.000175027	0.000193285	0.000296015	8.63049e-06	0.000304549	0.00018433	0.000210886	0.000330432	0.000231379	0.000271873	0.000263586	0.000195545	0.000364796	0.00155642	0.000175398	0.000541421	0.000304848
26722			level4			453.076	225.6	NEG													0.00151935	0.000829831	0.000580774	0.000275736	0.00175665	0.00209768	0.00137562	0.00191403	0.00154339	0.00119364	0.00134511	0.00090032	0.00129515	0.0011289	0.00198248	0.000832865	0.00189869	0.00116257	0.00170087	0.00103737	0.00131855	0.00124946	0.00119636	0.00126602	0.00180494	0.00603836	0.00109206	0.00292776	0.00221309
26725			level4			493.068	225.6	NEG													0.000752091	0.000273167	0.000237751	1.27469e-05	0.000805617	0.00147495	0.000543386	0.00106301	0.000842776	0.000688693	0.000579999	0.00040068	0.000571797	0.000385915	0.00113879	0.000594586	0.00111351	0.000467573	0.000832775	0.000448777	0.00066143	0.000382473	0.000582795	0.000792651	0.000887846	0.00321371	0.000455825	0.0017922	0.00133932
26733			level4			575.072	225.6	NEG													0.00025738	0.000272043	8.20531e-06	1.27469e-05	0.000243719	0.000876801	3.56366e-05	0.000482435	0.000226912	0.000325085	0.000214399	0.000176811	0.000137224	3.69312e-05	0.000436206	8.67866e-05	0.000533468	8.70338e-06	0.000289727	6.77596e-05	0.000236449	2.97428e-05	0.000173153	0.000337296	0.000427228	0.001293	4.81204e-05	0.000732385	0.000630644
26752			level4			584.08	225.5	NEG													0.000399826	0.000464581	0.000517914	1.27469e-05	0.000804991	0.000829961	0.00075142	0.000538749	0.000499687	0.00034133	0.000381688	0.000237206	0.000284339	0.000613545	0.000380868	0.000747028	0.000459636	0.00042553	0.000265592	0.000675193	0.000481592	0.000650979	0.000294058	0.000461412	0.000545968	0.00165618	0.000457659	0.000642776	0.000691275
26792			level4			230.04	224.2	NEG													0.000691738	0.000264472	0.000879497	1.27469e-05	0.000336851	0.000198572	0.00126463	0.000656957	0.000688293	6.5553e-05	0.000495944	0.000468236	0.000868521	0.000633096	0.000170056	0.000835768	0.000391459	0.000525986	0.000412516	0.00243156	0.000614623	0.00199686	0.000925582	0.00109577	0.000709081	0.00210265	0.000916301	0.000473365	0.000259095
27012			level4			171.077	219.4	NEG													0.00518616	0.00215892	0.001801	0.00720198	0.00211957	0.00196583	0.00195274	0.00144795	0.0019709	0.00149053	0.00190866	0.0038319	0.00416614	0.00352255	0.00110712	0.00730978	0.0114076	0.00245862	0.00211821	0.0043963	0.00347612	0.00179007	0.00949767	0.000980095	0.00393746	0.0136831	0.00169847	0.00235576	0.00200443
27152			level4			283.032	214.9	NEG													0.00231301	0.00597029	0.00131705	0.00116713	0.00391046	0.00200264	0.00254798	0.00237792	0.00208941	0.00189493	0.00230795	0.00209876	0.00193746	0.00272967	0.0028923	0.00326918	0.00182785	0.00663783	0.00273031	0.00265497	0.00273386	0.00216589	0.00446018	0.00162407	0.00280618	0.00401547	0.00159024	0.0034098	0.00254417
27191			level4			276.988	213.4	NEG													0.00055455	0.000899405	0.000201303	0.000994805	0.00050072	0.000173005	0.00023775	0.000457597	0.000467771	0.000436803	0.000287557	0.000370535	0.000485043	0.00083259	0.000557546	0.000980136	0.000178811	0.000831073	0.000279747	0.00071287	0.000521981	0.000456263	0.00105871	0.000357659	0.000667418	0.000919371	0.000529369	0.000403538	0.000280391
27277			level4	N-(2R-Hydroxyhexadecanoyl)-2S-amino-9-methyl-4E,8E-octadecadiene-1,3R-diol	-0.748174	564.903	212.4	NEG													0.00487562	0.0100643	0.00137779	0.00195437	0.00490228	0.00358139	0.00351625	0.00305536	0.0057092	0.00277413	0.00310379	0.00500384	0.00583734	0.00360818	0.00599809	0.00264598	0.00348224	0.00430711	0.00341834	0.00328958	0.00412526	0.00313314	0.0036067	0.00294762	0.00234342	0.0029943	0.00381719	0.00280874	0.00549975
27299			level4			280.104	212.1	NEG													0.00380721	0.00140508	0.00492018	0.000219699	0.00404316	0.000789988	0.00138341	0.00557036	0.000865006	0.00105134	4.32789e-05	0.000892007	0.00422426	0.00622152	0.00149634	0.00558471	0.00081319	0.00371895	0.00199373	0.00509313	0.00270683	0.00312459	0.005464	0.00144635	0.00281226	0.00086378	0.00720511	0.00228367	0.00194399
27360			level4			826.858	211.4	NEG													0.0022151	0.00263381	0.000726887	1.27469e-05	0.00259871	0.000869145	0.00186159	0.00185346	0.00163779	0.00231145	0.00331504	0.00278613	0.00223592	0.00217515	0.00296428	0.00199554	0.00312568	0.00235321	0.00217072	0.00123991	0.00205411	0.00174254	0.00221932	0.00249282	0.00228389	0.003248	0.00207425	0.00258715	0.00224937
27411			level4			273.12	210.4	NEG													0.00178388	0.00047315	0.000739563	1.27469e-05	0.000476135	0.000459177	0.000524378	0.000520128	0.000594712	0.000440028	0.000550057	0.00107065	0.00258735	0.00132824	0.000466124	0.00237956	0.000255331	0.000688565	0.00120759	0.000490707	0.000852404	0.000523994	0.00359801	0.00118556	0.00271379	0.000168959	0.00112619	0.000597288	0.00104762
27433			level4			451.983	210.2	NEG													0.00386874	0.00416738	0.000477712	0.00210012	0.00353147	0.00763091	0.00188076	0.00590937	0.00409047	0.00454934	0.00424332	0.00482914	0.00336357	0.00213472	0.00403474	0.00706467	0.00553506	0.00381009	0.00317335	0.00191293	0.00391539	0.00240445	0.0058074	0.00577169	0.00389323	0.00682237	0.00262725	0.00775646	0.0118949
27869			level4	Bluensidine 6-phosphate	3.70872	343.21	205.7	NEG													0.000335699	0.000204815	3.55703e-05	0.00025368	0.000101015	7.27723e-06	8.24451e-06	0.000195806	0.00096579	9.80269e-05	5.02653e-05	0.00137235	0.00151387	0.000970776	7.9958e-06	8.63049e-06	6.93304e-05	0.00048482	0.00139474	8.15532e-06	0.000404343	0.00129532	0.000368727	0.000373408	0.000917552	3.23306e-05	0.000481486	0.000497425	0.000389917
27971			level4			452.893	203.6	NEG													0.000361996	0.000384887	0.000274273	0.00101333	0.000750154	0.000662486	0.000681113	0.000754241	0.000438771	0.000685508	0.000629174	0.000994754	0.000478061	0.000480636	0.000601377	0.000466176	0.0009903	0.000768645	0.000499907	0.000566236	0.000624101	0.000740079	0.000752396	0.000459914	0.000871901	0.00280433	0.000527771	0.00160251	0.000823382
28057			level4	4-Hydroxycyclophosphamide	-19.9339	276.073	201.7	NEG													0.0019894	0.000971537	0.002458	0.00136668	0.00214512	0.00116176	0.000401105	0.00303842	0.000429562	0.000873567	0.000918604	0.000408899	0.00118989	0.00411185	0.000821173	0.00452544	0.000221586	0.0019918	0.00191905	0.00282598	0.00168847	0.00159922	0.00355287	0.000568027	0.00225966	0.000614465	0.00135124	0.00142006	0.00351169
28136			level4			171.077	200.2	NEG													0.00544804	0.00203131	0.00257565	0.00776215	0.00252111	0.00293997	0.00159946	0.00210159	0.00253939	0.00226898	0.00190211	0.00322123	0.00375428	0.00437244	0.00172236	0.00797519	0.000791573	0.0017646	0.00284016	0.00505308	0.00325923	0.00152475	0.00945723	0.00186722	0.00512517	0.013695	0.00194869	0.00373722	0.0026609
28166			level4			320.173	199.5	NEG													0.000357515	8.89294e-06	8.20531e-06	1.27469e-05	8.45926e-06	4.60552e-05	8.24451e-06	8.36801e-06	0.000155729	4.2204e-05	8.53913e-06	8.40253e-05	0.000403034	0.000424273	7.9958e-06	0.000870269	0.000121822	0.000650428	0.000824081	8.15532e-06	0.000202952	0.000134038	0.00119822	0.000125472	0.000560032	6.33985e-05	0.000168638	0.000293091	0.000693124
28206			level4			563.78	198.8	NEG													0.00114805	0.00137293	0.00141561	0.00115598	0.00160924	0.000683239	0.000870776	0.00154973	0.0013751	0.00131111	0.00151757	0.00105751	0.00131745	0.00125482	0.000793622	0.00110015	0.00151724	0.00155401	0.00118787	0.00138687	0.00125894	0.00148159	0.00086963	0.000893985	0.00148874	0.0012154	0.000508728	0.000743883	0.00138328
28224			level4			430.206	198.7	NEG													0.000225575	9.7833e-05	8.20531e-06	1.27469e-05	0.00013311	4.47873e-05	5.22339e-05	0.000300265	8.1902e-05	0.000138748	8.53913e-06	6.94059e-05	0.000248007	0.000145327	7.9958e-06	0.000404632	3.65797e-05	8.70338e-06	0.000280697	0.000512006	0.000140865	0.000128594	0.000377019	8.10805e-05	0.000204362	3.03001e-05	7.94877e-06	0.000667668	0.000152446
28265			level4			931.619	198.2	NEG													0.00153117	0.00130868	0.00170026	0.00145962	0.00214003	0.000722984	0.00175937	0.00171965	0.00222825	0.00176308	0.00180064	0.00146656	0.00210469	0.00186418	0.00150928	0.00170054	0.00204604	0.00139631	0.00141822	0.00182058	0.00167301	0.00179754	0.00107161	0.00155813	0.00176806	0.000334916	0.00153371	0.00121826	0.0013069
28284			level4			883.626	198.1	NEG													0.00075836	0.00081819	0.00119504	0.000486499	0.000318768	0.000575808	0.00121684	0.00145003	0.00152186	0.00124354	0.00108673	0.000733831	0.00104377	0.00140688	0.00140271	0.000693503	0.00133639	0.000951065	0.0011439	0.00123658	0.00103101	0.00112452	0.000759125	0.000982152	0.00121347	0.000202204	0.00137712	0.000734468	0.00134513
28354			level4	TG(22:1(13Z)/19:2n6/22:6(4Z,7Z,10Z,13Z,16Z,19Z))	3.67807	998.596	196.8	NEG													0.000962362	0.00116923	0.00100313	0.00111387	0.00133688	0.000599167	0.00141315	0.000748015	0.0015272	0.00148062	0.00148378	0.000442101	0.00155521	0.000673542	0.00140163	0.00130576	0.00139231	0.000873724	0.00102231	0.00130212	0.00114031	0.000917208	0.000495463	0.00111659	0.00115819	0.000577734	0.00133098	0.00124238	0.0015678
28370			level4			979.619	196.5	NEG													0.00121798	0.00183027	0.00110028	0.00212353	0.0021863	0.000631917	0.00206949	0.00173639	0.00231975	0.00157292	0.00208054	0.00100679	0.00254924	0.00156549	0.0010987	0.00127438	0.00211272	0.00205275	0.00180719	0.00133038	0.00168335	0.00142469	0.00127409	0.00108087	0.00154385	0.000698308	0.00177561	0.00104448	0.00126271
28375			level4	TG(22:0/22:5(4Z,7Z,10Z,13Z,16Z)/O-18:0)	-20.5413	978.627	196.3	NEG													0.00139689	0.00179554	0.00100382	0.00161394	0.00188955	0.00119606	0.00178418	0.00132211	0.00184525	0.00224179	0.00125864	0.00147086	0.00148217	0.00176827	0.00185039	0.00196644	0.00179892	0.00159034	0.00159915	0.0012898	0.00160821	0.00187894	0.00132354	0.00129483	0.00171912	0.000726754	0.00203028	0.00188768	0.000817504
28376			level4	TG(22:2(13Z,16Z)/22:6(4Z,7Z,10Z,13Z,16Z,19Z)/22:6(4Z,7Z,10Z,13Z,16Z,19Z))	-3.31853	1030.59	196.3	NEG													0.0013647	0.00131931	0.00151749	0.0016632	0.00178073	0.00106499	0.00239315	0.000920652	0.00172561	0.00230977	0.0015525	0.00130751	0.00151823	0.00130626	0.00209273	0.00132461	0.00189556	0.00110704	0.00146018	0.00159873	0.00156115	0.00169479	0.000828666	0.00182443	0.00140423	0.000594461	0.00165173	0.00139888	0.00174182
28377			level4			1029.6	196.2	NEG													0.00149536	0.00152007	0.00141084	0.000777736	0.00179881	0.000627642	0.00172024	0.00125983	0.00136153	0.00194453	0.00148445	0.0014808	0.000744292	0.00121346	0.00133375	0.00132121	0.00147444	0.00190304	0.00127831	0.00152322	0.00138368	0.00193705	0.00135486	0.00105758	0.00136092	0.000169718	0.00147024	0.00102614	0.000897186
28389			level4			611.287	195.9	NEG													0.000533744	0.000629318	0.00102327	0.000590853	0.00092915	0.000524013	0.00108021	0.000942929	0.0006117	0.00102215	0.001507	0.000851704	0.000821717	0.0011705	0.000913515	0.000739523	0.000976193	0.000998401	0.000739468	0.000957381	0.000878137	0.00124265	0.000521185	0.000635507	0.000811762	0.000470885	0.000736852	0.000783694	0.000754855
28396			level4			810.704	195.6	NEG													0.00224181	0.0029966	0.0030559	0.0033178	0.00328899	0.0019423	0.00325103	0.00332991	0.00363953	0.00302305	0.0036254	0.00273378	0.00342138	0.00362605	0.00267331	0.00274486	0.00379928	0.00214902	0.00217549	0.00370271	0.00303691	0.00353307	0.00232715	0.00254699	0.00277469	0.00196563	0.00333445	0.00192486	0.00275722
28432			level4			1076.61	194.9	NEG													0.000912932	0.000961487	0.000761152	0.00177864	0.00161555	0.00129353	0.00165888	0.00129028	0.00153035	0.00126812	0.00149111	0.000654966	0.00136151	0.0010709	0.00120887	0.00104298	0.000820547	0.00159988	0.000961788	0.00154064	0.00124121	0.00101488	0.0011597	0.00109808	0.00114094	0.000211763	0.00112174	0.000527154	0.00111196
28436			level4			1159.58	194.7	NEG													0.000612528	0.00116074	0.000971523	0.000556336	0.000882159	0.000888117	0.00110719	0.00146488	0.00145832	0.00107518	0.0014076	0.00111035	0.00105212	0.0013268	0.00105056	0.00152633	0.00122949	0.000720748	0.0010876	0.00130207	0.00109953	0.00134888	0.00088711	0.00146223	0.000924297	6.2666e-05	0.000888977	0.00045133	0.00119149
28450			level4	PE-NMe(22:2(13Z,16Z)/22:5(4Z,7Z,10Z,13Z,16Z))	3.46031	859.207	194.6	NEG													0.00130454	0.00174901	0.00153708	0.00203008	0.00149324	0.000512634	0.00177059	0.00102677	0.0013344	0.00106461	0.00147416	0.00105368	0.00111534	0.00108176	0.00163981	0.00134226	0.00125459	0.00109779	0.000777706	0.00102677	0.00128434	0.00130212	0.000899558	0.00128119	0.00112374	0.000193667	0.000885411	0.00205687	0.000917965
28462			level4			1126.59	194.5	NEG													0.00179532	0.00202134	0.00183023	0.00253884	0.00228928	0.000719752	0.0020915	0.00169386	0.00220972	0.00103282	0.00148737	0.00198551	0.00193832	0.00197389	0.00132132	0.00189042	0.00117044	0.00206917	0.0012682	0.00178889	0.00175581	0.00164032	0.00128218	0.00162217	0.00212453	8.15558e-06	0.00176106	0.000447505	0.000777079
28464			level4			1057.63	194.3	NEG													0.00173467	0.00156424	0.00181989	0.00158593	0.00160779	0.000763513	0.00168508	0.00144042	0.00264186	0.00209291	0.00229291	0.0020846	0.00193456	0.00164645	0.00174354	0.00187738	0.00128443	0.00135978	0.00135463	0.00225837	0.00173865	0.00185521	0.00125006	0.00149817	0.00177306	0.000199367	0.00212046	0.000654574	0.00141716
28465			level4			1158.58	194.3	NEG													0.0015775	0.00125353	0.00205411	0.00229935	0.00164169	0.00108376	0.00243623	0.0024468	0.0017478	0.00182114	0.00222239	0.00228527	0.00159326	0.00168433	0.00197706	0.00214606	0.00139052	0.00224135	0.00148352	0.00183276	0.00186092	0.00192574	0.00160074	0.0017229	0.00139113	8.15558e-06	0.00168804	0.001113	0.00111735
28467			level4	TG(22:0/22:6(4Z,7Z,10Z,13Z,16Z,19Z)/O-18:0)	20.945	976.651	194.2	NEG													0.00165619	0.00286208	0.00170818	0.0017793	0.00318292	0.0012665	0.00238094	0.00192973	0.00230612	0.00243871	0.00206024	0.00296185	0.00177329	0.00175739	0.00354011	0.00244502	0.00197766	0.00282109	0.00195325	0.00226484	0.00225327	0.00223355	0.00183791	0.00216421	0.00126919	0.000485244	0.00137867	0.00166079	0.00211575
28468			level4			1106.62	194.1	NEG													0.00159373	0.00167176	0.00181414	0.00231786	0.00326497	0.000866822	0.00264592	0.00216177	0.00213676	0.00154547	0.00248714	0.00132697	0.00144363	0.00146526	0.00177187	0.00166081	0.00117959	0.0019633	0.00204339	0.000983992	0.00181726	0.00143421	0.00182613	0.00182364	0.00187496	8.15558e-06	0.00207978	0.00335542	0.00106456
28481			level4	Decabromodiphenyl oxide	17.595	958.177	194	NEG													0.000915208	0.0011768	0.0011499	0.000980265	0.00140887	0.000429004	0.00166263	0.000635095	0.00120186	0.00121706	0.00113689	0.00146841	0.000978602	0.000796997	0.00116126	0.000786827	0.000829244	0.000752045	0.000841922	0.000967404	0.00102481	0.00139494	0.00100685	0.00119845	0.000657729	5.61994e-05	0.00111648	0.000234743	0.000593376
28485			level4			1126.59	194	NEG													0.00141557	0.00207699	0.0016722	0.0026405	0.00207549	0.00105183	0.0013447	0.00202465	0.00179993	0.00137934	0.00151941	0.00258332	0.00176053	0.00238888	0.00171941	0.00163355	0.00117044	0.00196479	0.00166612	0.00181439	0.0017851	0.00164032	0.00128218	0.00183554	0.00242129	7.43781e-05	0.00176106	0.000594005	0.000910279
28494			level4	1,3,4,5-Tetracaffeoylquinic acid	3.8973	839.731	193.9	NEG													0.00126283	0.000905346	0.0015585	0.00130304	0.00187225	0.000939982	0.00224336	0.00193027	0.00188464	0.00167456	0.0026303	0.00146955	0.0013168	0.00129245	0.00104492	0.00190496	0.00090702	0.00171908	0.00116946	0.00158049	0.00153049	0.00119524	0.0010792	0.00161029	0.00130285	8.16115e-05	0.00131157	0.00214903	0.00121353
28495			level4			908.195	193.9	NEG													0.00125404	0.00161732	0.0011959	0.00111165	0.00195318	0.000950795	0.00187392	0.00153177	0.00139348	0.00135732	0.00192742	0.00165413	0.00113205	0.00118207	0.00170565	0.00134075	0.00149198	0.00190217	0.00123009	0.00103774	0.00144217	0.0018697	0.00114204	0.000999936	0.00126885	9.85254e-05	0.00111528	0.00155908	0.00124761
28504			level4			957.674	193.6	NEG													0.00307025	0.00371334	0.00324788	0.00607845	0.00469995	0.00260964	0.00403498	0.00481319	0.00343915	0.0041595	0.00485527	0.00510924	0.00401871	0.00440065	0.0056104	0.00413756	0.00349473	0.00421178	0.00375328	0.00223123	0.00408446	0.00406715	0.00333989	0.00432132	0.00405087	0.000285409	0.00369176	0.0048758	0.00252455
28505			level4			1075.62	193.6	NEG													0.00153314	0.00177936	0.00129416	0.00243173	0.00151687	0.00131242	0.00243027	0.0013375	0.00151936	0.00166919	0.0015195	0.00132609	0.00163312	0.00161906	0.00143047	0.00196513	0.00134969	0.00149483	0.00177882	0.00171641	0.00163286	0.00129944	0.00229333	0.00169383	0.0017265	0.000380146	0.00183598	0.00108222	0.00162547
28524			level4	DG(a-25:0/6 keto-PGF1alpha/0:0)	23.0797	808.234	193.3	NEG													0.00236629	0.00293096	0.00233136	0.00450525	0.00295557	0.00173944	0.00284187	0.00240204	0.002996	0.00351383	0.00299539	0.00334162	0.00318949	0.00279684	0.00306384	0.00181164	0.00260581	0.00234979	0.00219415	0.00407699	0.00285041	0.00179612	0.0027834	0.00204559	0.00291684	0.000507527	0.00214756	0.00270194	0.00365838
28526			level4			858.215	193.3	NEG													0.00242937	0.0020675	0.00213663	0.0056269	0.00326314	0.00273092	0.00253131	0.00239167	0.00340203	0.00309641	0.00239153	0.00236524	0.00285776	0.00270395	0.00202498	0.00204541	0.00225544	0.00160158	0.00239249	0.00259612	0.00264552	0.00396719	0.0016114	0.00272983	0.00275028	7.03477e-05	0.0030081	0.00245211	0.00280581
28550			level4			1055.65	192.7	NEG													0.00377768	0.0027888	0.00551355	0.00261249	0.00307855	0.00400183	0.004168	0.0027009	0.00422673	0.00292383	0.00446155	0.00356566	0.000658289	0.00140741	0.00327858	0.00204667	0.00416521	0.00337338	0.0031334	0.00329651	0.00325895	0.0026554	0.00269205	0.00354203	0.00400165	7.61726e-05	0.00278642	0.00204719	0.0029636
28554			level4	2-Iodo-6-methoxyphenol	-4.49299	249.025	192.6	NEG													0.00177594	0.00155203	0.00134571	0.00183619	0.00265879	0.00215276	0.00195462	0.00184567	0.00172612	0.0022836	0.00165506	0.00165043	0.00165186	0.00235819	0.00141219	0.00158833	0.0026613	0.00183642	0.00336531	0.00184253	0.00195765	0.00276306	0.00151217	0.00137883	0.00235862	0.00292837	0.00301844	0.00235432	0.00390195
28556			level4			299.147	192.6	NEG													0.00162546	8.89294e-06	0.000249089	0.00157056	0.000166595	6.28882e-05	8.24451e-06	8.36801e-06	8.47214e-05	0.000132848	0.000230008	0.000194757	0.000123003	7.70829e-05	7.9958e-06	0.000969597	7.78735e-06	0.000720682	9.02636e-05	0.000536078	0.000343746	8.46404e-06	0.00424109	0.000496963	0.00117403	4.58717e-05	7.94877e-06	8.51141e-06	0.000544049
28565			level4			787.767	192.6	NEG													0.0221833	0.0113101	0.0230696	0.0347382	0.0236224	0.0110073	0.024267	0.0182222	0.0259626	0.0231632	0.0267446	0.00890867	0.0233234	0.0240835	0.00962206	0.0142681	0.0177435	0.029307	0.0203223	0.0233595	0.0207614	0.0224751	0.0238777	0.00754613	0.0193478	0.00184254	0.0098191	0.00934399	0.0156996
28569			level4			957.679	192.6	NEG													0.00388001	0.00538467	0.00525264	0.0056723	0.00415079	0.00391648	0.00417532	0.00571427	0.00602583	0.00650357	0.00495445	0.00577977	0.00515669	0.00402667	0.005113	0.00490218	0.00501653	0.00438692	0.00477168	0.00394738	0.00493656	0.00497353	0.00306044	0.00412868	0.0030978	0.000499275	0.00453432	0.00495148	0.00557311
28571			level4			137.996	192.4	NEG													0.05712	0.0482398	0.0543638	0.0894919	0.064631	0.0414819	0.0628443	0.059095	0.0628325	0.0560346	0.0677769	0.0724497	0.0606305	0.0644583	0.0603946	0.0452676	0.0541102	0.0524997	0.044944	0.0678738	0.059327	0.0646485	0.0602687	0.0560305	0.05934	0.0241192	0.0669882	0.0354447	0.0353399
28575			level4	9,10-Dihydroergocornine methanesulfote	-2.00578	658.785	192.1	NEG													0.0119046	0.012257	0.00896644	0.0176902	0.0144638	0.00793199	0.0166113	0.0132027	0.0153671	0.0143232	0.0157903	0.0119704	0.0166048	0.0134182	0.0155392	0.0144778	0.0114844	0.0141303	0.011623	0.0148544	0.0136306	0.0164421	0.00928916	0.0129557	0.0127766	0.00200021	0.0153602	0.0112602	0.013514
28581			level4	Cloricromen	12.8236	394.878	192	NEG													0.0578279	0.0608343	0.0661791	0.0956385	0.0646526	0.048281	0.0671293	0.0627464	0.0647714	0.0617409	0.0682479	0.074668	0.0649218	0.0640869	0.0625635	0.0659408	0.0486836	0.0603288	0.0558093	0.0692315	0.0642142	0.0675131	0.057546	0.0583544	0.0617204	0.0158977	0.0697778	0.0443297	0.0522355
28585			level4			657.79	192	NEG													0.00751949	0.00835624	0.00946985	0.00955026	0.00847438	0.00523239	0.00918362	0.00811529	0.00923736	0.00890985	0.0102014	0.0077059	0.00890069	0.0087177	0.0086083	0.0090452	0.00835367	0.00861756	0.00628912	0.0109249	0.00857065	0.00943067	0.00846537	0.00771615	0.0066152	0.00104553	0.0101985	0.00653514	0.00739684
28597			level4	TG(14:0/22:0/24:0)	12.7878	974.668	192	NEG													0.00295839	0.00207728	0.00290753	0.00232304	0.00386129	0.00247877	0.00448489	0.00342696	0.00375452	0.00475092	0.00442223	0.0026337	0.00372614	0.00366526	0.00368769	0.0039154	0.00397527	0.00243359	0.00346518	0.00360316	0.00342756	0.00450402	0.00151527	0.00324408	0.00481173	5.30669e-05	0.00237287	0.00280904	0.00423893
28614			level4			757.756	191.4	NEG													0.0125485	0.0132359	0.0159053	0.0187765	0.0156673	0.0094033	0.00913229	0.0157227	0.0145427	0.0164164	0.0173108	0.0172009	0.0168713	0.0166871	0.0161615	0.0153937	0.0132613	0.0095581	0.0152605	0.0175421	0.0148299	0.0154414	0.0148618	0.0102881	0.0133662	0.00106908	0.00810482	0.0107632	0.0132389
28627			level4			744.778	191.3	NEG													0.00673777	0.0056265	0.00649607	0.010786	0.00712037	0.00487536	0.0066215	0.00625045	0.00710512	0.00652624	0.00682126	0.00856016	0.00686014	0.0060355	0.00609677	0.00794441	0.00622575	0.00724047	0.00633945	0.0075701	0.00689197	0.00675788	0.00702146	0.00682596	0.00595179	0.000854581	0.00662311	0.00444024	0.00491424
28634			level4	TG(20:0/24:1(15Z)/O-18:0)	-15.5139	986.695	191.3	NEG													0.00934494	0.0100661	0.00996599	0.0144099	0.0070341	0.00663918	0.00993349	0.00665304	0.0113184	0.010473	0.0133844	0.0146979	0.0117202	0.0100526	0.00967478	0.0114663	0.00872514	0.0101902	0.00512837	0.00574213	0.00983101	0.0107392	0.00611057	0.00978373	0.0100478	0.000998591	0.011818	0.0076125	0.00935614
28635			level4			1005.67	191.3	NEG													0.00731471	0.00791253	0.00933781	0.0101645	0.00926899	0.00525523	0.00836151	0.00863402	0.0101008	0.00903538	0.0102578	0.00860611	0.00904718	0.00830429	0.00951917	0.0104121	0.00827812	0.00902404	0.00266554	0.00900822	0.0085254	0.00909609	0.00387102	0.00804122	0.00346567	9.68595e-05	0.0100806	0.00443214	0.0069969
28636			level4			1023.66	191.3	NEG													0.00457519	0.00489022	0.00543256	0.00464885	0.00573859	0.00327199	0.00584545	0.00471677	0.00310341	0.00515287	0.00633983	0.00444677	0.00554864	0.00446469	0.00555042	0.00455452	0.00416013	0.00468971	0.00577597	0.0054118	0.00491592	0.00515252	0.00395209	0.00406778	0.00298391	8.79873e-05	0.00451209	0.00282637	0.00462118
28637			level4			1072.65	191.3	NEG													0.00521079	0.00474731	0.00342579	0.00701321	0.00560428	0.0033047	0.00498586	0.00450264	0.00615224	0.00444652	0.00577611	0.00498567	0.00578461	0.00634942	0.00414839	0.00290624	0.00388113	0.00537864	0.00319891	0.00520102	0.00485017	0.00579037	0.00413565	0.00556254	0.00535239	0.000287258	0.00586924	0.00281954	0.00341183
28642			level4			639.809	191.2	NEG													0.00384721	0.00998522	0.00814658	0.0138896	0.010585	0.00560291	0.00561238	0.00882081	0.00919142	0.0100738	0.0105704	0.00936847	0.00993757	0.0102555	0.00889147	0.0100133	0.00817981	0.00725428	0.00742803	0.010244	0.00889489	0.0107564	0.0108408	0.0103059	0.00663119	0.00106939	0.00881139	0.00604558	0.00719385
28643			level4	calphostin C	-3.82334	789.764	191.2	NEG													0.00523009	0.00266564	0.00513206	0.00486482	0.00536086	0.00276372	0.00485754	0.00443568	0.00382355	0.00523354	0.00519041	0.00472596	0.00351505	0.00520873	0.00524425	0.00611759	0.00525123	0.00639143	0.00355996	0.00389115	0.00467316	0.00395336	0.0054573	0.00265658	0.00565421	0.000394018	0.00541088	0.00244192	0.00316592
28645			level4			1073.64	191.2	NEG													0.00378157	0.00318563	0.00195631	0.00240742	0.00437424	0.00304695	0.00324702	0.00475549	0.00494062	0.0037177	0.0049085	0.00214118	0.0043509	0.00420886	0.00378764	0.00302971	0.00378125	0.00365868	0.00424437	0.00277874	0.00361514	0.00495176	0.00320454	0.00294243	0.00437798	0.000341599	0.00410849	0.00196245	0.00356258
28647			level4			856.727	191.1	NEG													0.0109271	0.0145175	0.00744187	0.0169593	0.0146035	0.00755753	0.0154183	0.0132398	0.0107031	0.0134593	0.0147394	0.0139058	0.00754173	0.0131867	0.0110535	0.0127859	0.0111564	0.014763	0.0082702	0.0140372	0.0123134	0.0109594	0.00888404	0.0115941	0.0120154	0.000763816	0.0144213	0.00832655	0.0108867
28653			level4			639.317	190.8	NEG													0.000498282	0.00193512	0.0016322	0.00203786	0.00199575	0.00146222	0.00199416	0.00107591	0.0021859	0.00153366	0.00252801	0.000908296	0.00146201	0.00213756	0.00197353	0.00162995	0.00101233	0.00162738	0.000603138	0.00208887	0.00161611	0.00165249	0.000797741	0.000920817	0.00120365	8.15558e-06	0.00181853	0.000715359	0.00108047
28750			level4			588.865	190.6	NEG													0.00190483	0.0017369	0.00236261	0.00229535	0.00135663	0.000720733	0.00163534	0.00156062	0.00138477	0.00123237	0.000968803	0.000750194	0.00121696	0.00109052	0.00209986	0.00126527	0.00080712	0.00213205	0.00124996	0.0013567	0.00145638	0.000965022	0.00140972	0.0010455	0.000945209	0.000586057	0.00202625	0.000585492	0.00117615
28793			level4			738.783	190.6	NEG													0.0197045	0.0189671	0.0198367	0.0266063	0.0173234	0.0103156	0.0208966	0.0126862	0.0221094	0.0199973	0.0203432	0.0294031	0.0182739	0.0191458	0.0177841	0.02161	0.0128541	0.0203162	0.0135185	0.0205184	0.0191105	0.0185995	0.0178253	0.016412	0.0173613	0.000859467	0.0245383	0.00910773	0.0131965
28814			level4			804.756	190.6	NEG													0.00563401	0.00479631	0.00665134	0.00747643	0.00610405	0.00332519	0.00662846	0.00637873	0.00610557	0.00518594	0.00784962	0.00591255	0.00589896	0.00638007	0.00671294	0.00648584	0.00486673	0.00703134	0.00636573	0.00656956	0.00611797	0.00613675	0.00533914	0.00515933	0.00457121	8.15558e-06	0.00896308	0.00249768	0.00313103
28816			level4	Fam-vad-fmk	5.301	805.75	190.6	NEG													0.0115803	0.0119262	0.010816	0.0187616	0.0131934	0.00697278	0.0140533	0.0102835	0.014962	0.0124484	0.0141537	0.0120127	0.0127817	0.0130819	0.0117944	0.0139421	0.010588	0.0122697	0.0109265	0.0133313	0.012494	0.0115523	0.0138093	0.01239	0.0116996	0.000320825	0.0146192	0.00588558	0.0086171
28817			level4			806.252	190.6	NEG													0.00342766	0.0045054	0.00424336	0.00427736	0.00346614	0.00168187	0.00469584	0.00378324	0.00276762	0.00455641	0.00449446	0.00505797	0.00323233	0.00392545	0.00293087	0.00275578	0.0032547	0.00288819	0.00357369	0.00484789	0.00371831	0.00272812	0.00241107	0.00391105	0.00369567	8.15558e-06	0.00434688	0.002358	0.00170301
28841			level4			855.734	190.6	NEG													0.0138859	0.0142513	0.015004	0.0238997	0.0155905	0.00798574	0.0165242	0.0137183	0.0162926	0.0154204	0.0188249	0.0200195	0.0143771	0.0134114	0.0142864	0.0171656	0.0108359	0.0166917	0.0147595	0.0162287	0.0154587	0.014594	0.00981579	0.012909	0.0147304	0.000398005	0.0161094	0.0068003	0.0104888
28854			level4			886.744	190.6	NEG													0.0126996	0.0136882	0.020732	0.024786	0.0175423	0.0117494	0.0148885	0.0159218	0.0182345	0.0150245	0.0235305	0.00243384	0.0188173	0.0122279	0.0164309	0.0217969	0.0146977	0.0191771	0.0182908	0.0155941	0.0164132	0.0106817	0.00623079	0.0135363	0.0129912	0.00169297	0.0185936	0.0107771	0.014656
28886			level4	PG(20:3(5Z,8Z,11Z)/LTE4)	-8.49533	955.205	190.6	NEG													0.00619499	0.00525951	0.00526959	0.00810694	0.00579707	0.00284854	0.00723055	0.00434885	0.00706243	0.00453077	0.00642045	0.00791106	0.00429699	0.00667962	0.00458636	0.00664436	0.00390557	0.00640303	0.00576708	0.00621714	0.00577405	0.00517963	0.00587551	0.00489875	0.0057578	8.15558e-06	0.00537833	0.00180688	0.00415747
28887			level4	Chebulinic acid	24.3306	955.696	190.6	NEG													0.0106702	0.0123499	0.0111687	0.0159557	0.0130364	0.00759387	0.0133612	0.0114289	0.00951997	0.0115856	0.0125185	0.0147335	0.011161	0.0113822	0.0103378	0.00723064	0.00961059	0.0137431	0.00986496	0.00924181	0.0113247	0.0132938	0.0107106	0.0108922	0.00885435	0.000137386	0.00949455	0.0066261	0.00959425
28888			level4			956.198	190.6	NEG													0.00310885	0.00448588	0.00411891	0.0063268	0.00382295	0.00214743	0.00427217	0.00427306	0.00415644	0.00453358	0.00445188	0.00476387	0.00426157	0.0040587	0.00362412	0.00289389	0.00366302	0.00547902	0.0042068	0.0035881	0.00411185	0.0032414	0.00374322	0.0042155	0.00422596	8.15558e-06	0.00370033	0.00226567	0.00346329
28890			level4			973.678	190.6	NEG													0.00179171	0.00330956	0.00404512	0.00289095	0.00373019	0.00267973	0.0042206	0.00341522	0.0033529	0.00457585	0.00409681	0.00365686	0.00337107	0.00343587	0.00226256	0.00272688	0.0027375	0.00328069	0.00287618	0.00293432	0.00326953	0.00450614	0.00222315	0.00216187	0.00221605	6.21667e-05	0.0043555	0.00228452	0.00334514
28901			level4	TG(24:0/22:6(4Z,7Z,10Z,13Z,16Z,19Z)/O-18:0)	-0.421004	1004.68	190.6	NEG													0.00909915	0.0112174	0.0111184	0.0145932	0.0118218	0.0065365	0.013504	0.00945711	0.0143996	0.0107873	0.0136029	0.0170128	0.0129267	0.0128506	0.0107066	0.0136544	0.00937401	0.0136152	0.0109065	0.0106501	0.0118917	0.0129334	0.0114164	0.0111174	0.0119393	9.45342e-05	0.0147195	0.00485944	0.00719434
28904			level4			1021.67	190.6	NEG													0.00277174	0.00256497	0.00324108	0.00375734	0.00317133	0.00160504	0.00383345	0.00300813	0.00422031	0.00235832	0.00276044	0.00548071	0.0037643	0.00311396	0.00312368	0.00342534	0.00263352	0.00359753	0.00273624	0.0029283	0.00320479	0.00291241	0.002655	0.00253269	0.00287631	8.15558e-06	0.00365697	0.00136087	0.00219246
28916			level4			1053.67	190.6	NEG													0.00799646	0.00842552	0.00952262	0.0140636	0.0093755	0.00423126	0.00996246	0.00763706	0.0114506	0.0082934	0.0106008	0.0125793	0.00780193	0.00906757	0.0092142	0.00969021	0.00663724	0.0104672	0.00753741	0.0103223	0.00924383	0.00699945	0.00887376	0.00555395	0.00706697	8.15558e-06	0.0119281	0.00292117	0.0049771
28919			level4			1071.66	190.6	NEG													0.00487461	0.0044237	0.00560196	0.00723592	0.005525	0.00210662	0.00685638	0.00447978	0.0059684	0.00455061	0.00624107	0.00597846	0.00487334	0.00437378	0.00446687	0.00590081	0.00344772	0.00586931	0.0055555	0.00413869	0.00512343	0.00566507	0.00428223	0.00436571	0.00362834	8.15558e-06	0.00738065	0.001109	0.00345033
28924			level4			1084.68	190.6	NEG													0.00444895	0.00514043	0.0051541	0.00648747	0.00535862	0.0035036	0.0064976	0.00443381	0.00678285	0.00586218	0.00676443	0.00778931	0.00427995	0.00487396	0.00397068	0.00526228	0.00449825	0.00515262	0.0025452	0.00610168	0.0052454	0.005552	0.00453637	0.00357154	0.00461168	8.15558e-06	0.00705397	0.00290594	0.00441679
28930			level4			1102.66	190.6	NEG													0.00740311	0.00702886	0.00717089	0.00774448	0.00774183	0.00342973	0.00774692	0.00580912	0.00816982	0.0071506	0.00822735	0.00998392	0.00643444	0.00762764	0.00688947	0.00897281	0.00539966	0.00959324	0.0039396	0.00719366	0.00718286	0.00664848	0.00866981	0.0070241	0.00649282	8.15558e-06	0.0088366	0.00189875	0.00425491
28931			level4	CDP-DG(22:6(4Z,7Z,10Z,13Z,16Z,19Z)/PGJ2)	-4.54945	1103.17	190.6	NEG													0.00304598	0.0026504	0.0029147	0.00397223	0.0037493	0.0010532	0.00420106	0.0028248	0.00276467	0.00323492	0.00284645	0.00193895	0.00177511	0.0027407	0.00275124	0.00307623	0.00242094	0.00306609	0.00228839	0.00284652	0.00280809	0.00353709	0.00244481	0.0026205	0.00221578	0.000162531	0.0026787	0.0011358	0.00167022
28941			level4			1123.63	190.6	NEG													0.00429452	0.00503754	0.00549269	0.00483493	0.00636323	0.00343026	0.00449192	0.00469956	0.00617974	0.0054462	0.00528543	0.00221137	0.00516692	0.0058925	0.00493167	0.00545091	0.00466402	0.00558711	0.0038505	0.00485958	0.00490853	0.00562292	0.00411782	0.00552779	0.00425009	6.23603e-05	0.00584945	0.00311052	0.00470432
28944			level4	15-(3-methyl-5-pentylfuran-2-yl)pentadecanoyl-CoA	-12.8035	1141.12	190.6	NEG													0.00222741	0.00127623	0.00294435	0.00178727	0.00117084	0.00090952	0.00194635	0.00149689	0.00312048	0.00193868	0.00147756	0.00128006	0.0026673	0.00315557	0.00157179	0.00167346	0.00139189	0.00171608	0.00225648	0.00206899	0.00190386	0.00199802	0.00267126	0.00112247	0.00109262	8.15558e-06	0.00309	0.000755907	0.00152856
28945			level4			1141.61	190.6	NEG													0.0058673	0.00447735	0.00606212	0.00556398	0.00516469	0.00239281	0.0058562	0.0038799	0.00659214	0.00496305	0.00493629	0.00549656	0.00630628	0.00520823	0.00488336	0.00584206	0.00286662	0.0047701	0.00477178	0.00571242	0.00508066	0.00561643	0.00548188	0.0063716	0.00429642	8.15558e-06	0.00627233	0.00184895	0.00393271
28950			level4			1152.64	190.6	NEG													0.00461232	0.00539581	0.00480517	0.00634341	0.00587978	0.00293637	0.00799203	0.00580816	0.00635316	0.00635295	0.00588599	0.00581107	0.00574795	0.00612134	0.00568416	0.00585864	0.00545856	0.00753776	0.00646114	0.00673949	0.00588926	0.00631285	0.00430899	0.0053187	0.00522126	6.65963e-05	0.00646971	0.00228737	0.00455506
28951			level4			1169.64	190.6	NEG													0.00318278	0.00360028	0.00322803	0.00417284	0.00350986	0.00124824	0.00408913	0.00233753	0.00322193	0.00257628	0.00266885	0.00816225	0.00221994	0.0030022	0.00182244	0.00232288	0.00128538	0.00459951	0.00276802	0.00318132	0.00315998	0.00181705	0.00249942	0.00286964	0.00173305	8.15558e-06	0.00398869	0.000561885	0.000584515
28955			level4			1188.61	190.6	NEG													0.00427342	0.00364354	0.0026336	0.00427464	0.00425146	0.000788857	0.00436197	0.00303848	0.00364098	0.00362835	0.0040593	0.00189144	0.00298459	0.00228037	0.00253434	0.00224153	0.00185306	0.00165429	0.00352998	0.00313157	0.00303479	0.00411438	0.00238663	0.00300977	0.00294905	8.15558e-06	0.00289311	0.00125495	0.00281055
28979			level4			1189.61	190.4	NEG													0.00237661	0.0018619	0.00263625	0.0040893	0.00333553	0.00123464	0.00352275	0.00348761	0.00422552	0.00269057	0.00195374	0.00217309	0.00327793	0.00264027	0.00294213	0.00221695	0.00240671	0.00283597	0.001721	0.00371639	0.00276724	0.00304181	0.00352646	0.00234907	0.00259244	8.15558e-06	0.00259279	0.00104426	0.00280964
28992			level4			412.957	189.8	NEG													0.0113767	0.0116457	0.0141997	0.0159916	0.0124898	0.0102498	0.0130038	0.0143319	0.0102799	0.0105261	0.0110387	0.0166424	0.0121662	0.0104072	0.0111053	0.0130698	0.0115557	0.0119346	0.0128559	0.0153614	0.0125116	0.011851	0.0122021	0.00956179	0.0143643	0.00537117	0.0114223	0.0136492	0.0106573
28996			level4			262.093	189.3	NEG													0.014057	0.00292232	0.00492034	0.00101707	0.00505955	0.00274372	0.00116227	0.00612058	0.000936878	0.00961449	0.000916542	0.00147576	0.00199702	0.00782583	0.00359753	0.00654742	0.0028239	0.00608323	0.00829549	0.00487239	0.00464947	0.00337352	0.0192032	0.00298801	0.00261452	0.00176842	0.00363298	0.00606348	0.00812322
29006			level4			520.253	188	NEG													0.00101382	0.000347813	0.000570861	1.27469e-05	0.000859439	0.000188684	0.000261673	0.0003108	0.000545989	0.0010685	8.53913e-06	8.28813e-06	0.000198865	0.00154976	0.000200343	0.00184958	0.000145261	0.000573631	0.000708795	0.00153293	0.000597815	0.000647722	0.00222251	0.000309816	0.00345271	8.15558e-06	0.000294518	0.00262512	0.000536763
29223			level4			402.152	180.3	NEG													0.000413867	0.00015264	8.20531e-06	1.27469e-05	8.45926e-06	7.27723e-06	0.000130264	0.000532759	7.93898e-05	4.55413e-05	8.53913e-06	0.000148093	7.88015e-05	8.43665e-06	3.82021e-05	0.000283454	7.78735e-06	6.56178e-05	2.50618e-05	3.49238e-05	0.000104503	8.76388e-05	0.00144001	3.3723e-05	8.99569e-05	4.39363e-05	0.000238565	0.000293132	8.48302e-06
29374			level4			345.178	178.1	NEG													0.000361418	0.000345912	3.23215e-05	1.27469e-05	9.33689e-05	7.27723e-06	8.24451e-06	0.000308893	8.40406e-05	7.69206e-05	8.53913e-06	0.000920989	0.000355895	0.000724812	0.00010831	0.00112225	7.78735e-06	0.000221331	0.000100415	8.15532e-06	0.000245481	3.05346e-05	0.00173231	0.000788187	0.000920894	8.15558e-06	0.000781011	8.51141e-06	8.48302e-06
29490			level4			182.032	174.3	NEG													0.383666	0.70028	0.928346	1.1775	1.07805	0.703902	1.5012	0.361372	1.16064	0.40397	1.0682	1.02494	0.789393	0.538695	0.688655	0.724866	1.01185	0.415957	0.510543	0.299212	0.773562	0.240249	0.117823	0.510828	0.291959	0.115984	0.570618	0.950377	0.374578
29492			level4			258.084	174.3	NEG													0.000529676	0.000213999	0.000412004	0.000162459	0.000117985	0.000151423	0.000225945	0.000362513	0.000221593	0.000235343	0.000416664	0.000169519	0.000294059	0.000340163	0.000257307	0.000772883	0.000137622	0.000791584	0.000388632	0.000461963	0.000333167	0.000315044	0.000572406	0.000313305	0.00251917	0.000278279	0.00039417	0.000319713	0.000395324
29514			level4			448.977	173.4	NEG													0.000602192	0.00032331	0.000413403	1.27469e-05	0.000402674	7.27723e-06	0.000661434	0.000923602	0.000449327	0.000126362	0.0003828	0.000723281	0.000387823	0.000396499	0.000599221	0.000598593	0.000455666	0.000386981	0.000565059	0.000901528	0.000465989	0.000197019	0.000334302	0.000424581	0.000782715	0.0017184	0.000579017	0.000628541	0.000916744
29618			level4			368.028	171.3	NEG													0.000237013	0.00062221	0.00106488	1.27469e-05	0.00109813	0.00112452	0.00109725	0.000564844	0.000939141	0.000360165	0.000954291	0.000367101	0.0008482	0.000455873	0.000721023	0.000256726	0.000820435	0.000366243	0.000741824	0.000386716	0.000651966	0.00174556	0.000452515	0.000777273	0.0010741	0.002013	0.00158402	0.00208999	0.000847207
29644			level4	(Z)-1-[4-(4-Diethylaminobutoxy)phenyl]-1,2-diphenyl-2-chloro-ethylene	18.6088	433.021	171	NEG													0.000355435	0.000382357	0.000576008	0.00187729	0.000982402	7.27723e-06	0.000818589	0.000682314	0.000647929	0.000498737	0.000467388	0.00063971	0.000633911	0.000532272	0.000474974	0.00037097	0.000333889	0.000457154	0.000789394	0.000455936	0.000599197	0.00135355	0.000679886	0.000795319	0.00118475	0.00173076	0.00158732	0.00136509	0.000847867
29649			level4			275.032	170.9	NEG													0.00162212	0.00168639	0.00179991	0.00528468	0.00329904	0.000805026	0.00206401	0.00237464	0.00206488	0.00202246	0.00146089	0.00154335	0.00167949	0.00251658	0.00148638	0.00443206	0.0010122	0.00224731	0.00282518	0.00234903	0.00222878	0.00503652	0.00250282	0.0031935	0.00535782	0.00604381	0.00582229	0.00459011	0.00513078
29650			level4			351.018	170.9	NEG													0.000936735	0.000944818	0.00125303	1.27469e-05	0.00150854	0.000580841	0.00232093	0.00110444	0.00172024	0.000138991	0.000238806	0.00149646	0.00182073	0.00103862	0.0015243	0.00160721	0.00183452	0.00111913	0.00118469	0.00088354	0.00116347	0.00204941	0.000890311	0.00150445	0.00211785	0.00213519	0.00225417	0.00159433	0.00164791
29659			level4			291.006	170.8	NEG													0.000311674	0.000211211	0.000372392	0.000556818	0.000796044	7.27723e-06	0.000488256	0.000579524	0.000420553	0.00041822	0.00028843	0.000328953	0.000369029	0.000380789	0.000303179	0.000586341	0.000191774	0.000478184	0.000494143	0.000478664	0.000403073	0.000966789	0.000422665	0.000532224	0.00114049	0.00120354	0.0011146	0.00111704	0.000819634
29677			level4			563.008	170.7	NEG													0.000607963	0.000390098	0.000853726	1.27469e-05	0.000755577	7.27723e-06	0.00110201	0.000786143	0.000932016	0.000495334	0.000781962	0.00144749	0.00169012	0.000628571	0.000922703	0.00156366	0.00101083	0.000661617	0.000721676	0.000475202	0.000792336	0.00108388	0.000675561	0.000900572	0.00150898	0.000657244	0.00108523	0.00112525	0.00103241
29683			level4	Phenol, 4-[bis(2-iodoethyl)amino]-	-24.5148	416.012	170.6	NEG													0.000669849	0.000103666	0.000297942	1.27469e-05	0.000636172	7.27723e-06	0.000566307	0.000836397	0.000423426	0.000549203	0.000482985	0.000591825	0.000607609	0.000749831	0.000346487	0.00196483	0.000419454	0.000873133	0.000731858	0.000907538	0.000588927	0.00113532	0.00109426	0.00100955	0.00174314	0.00124215	0.00169146	0.000827507	0.00122445
29684			level4			440.989	170.6	NEG													0.000382465	0.0025786	0.000284609	1.27469e-05	0.000440235	0.00021133	0.000493305	0.0034255	0.000573207	0.00195959	0.000439848	0.00129317	0.00274347	0.00438977	0.000516538	0.000450815	0.00071866	0.000498301	0.000700966	0.00231435	0.00122137	0.00294096	0.000744242	0.00130618	0.00202035	0.00533453	0.00360939	0.000446883	0.00319659
29724			level4			511.999	170.2	NEG													0.000683678	0.000184018	0.000415832	1.27469e-05	0.000647231	7.27723e-06	0.000320931	0.000730095	0.000314723	0.000492001	0.00034418	0.000543216	0.000185846	0.000489256	0.00059676	0.0004117	0.000312439	0.000545167	0.000341962	0.000270053	0.000392456	0.000486943	0.000477556	0.000980719	0.000859827	0.000470164	0.000410672	0.000302664	0.000681089
29742			level4	Dacthal	6.85797	330.959	170.1	NEG													0.000370162	0.00349752	0.000367652	1.27469e-05	0.0018504	0.000931404	0.000348937	0.000431962	0.000435236	0.00371332	0.000406129	0.00504642	0.00397622	0.00865081	0.00037055	0.000387695	0.000212823	0.00559949	0.000372133	0.000545689	0.00187636	0.00228164	0.00609058	0.00743038	0.00475669	0.000424796	0.00051146	0.000268839	0.00460733
30015			level4			325.089	168.9	NEG													0.344248	0.198616	0.418136	0.0139432	0.812579	0.0265741	0.131507	0.572305	0.136812	0.232375	0.165542	0.172884	0.272361	0.874633	0.596564	1.35259	0.193985	0.313553	0.331619	1.01421	0.408752	0.483238	0.527739	0.277567	0.050521	0.137486	0.429728	0.849427	0.55403
30060			level4			138.039	165.9	NEG													0.00184824	0.000614295	0.000408028	0.00359129	0.00180409	7.27723e-06	0.00232437	0.00185576	0.0016293	0.00105927	0.000960583	0.00234664	0.00204296	0.00393639	0.00131723	0.00544346	0.00136099	0.00172501	0.00217402	0.00103517	0.00187422	0.00209316	0.00611856	0.00136433	0.0044607	0.00204186	0.00476306	0.00300559	0.00183526
30062			level4	Curium	1.92955	245.993	165.9	NEG													0.00248962	0.0019046	0.00270123	0.00242767	0.00495988	8.99765e-05	0.00355704	0.00389021	0.00489804	0.00272429	0.00372184	0.00234886	0.0023834	0.00194657	0.00249978	0.00293722	0.00255043	0.00303185	0.00385253	0.00347029	0.00291927	0.00308903	0.00459261	0.00242789	0.00453467	0.00565864	0.00350372	0.00395131	0.00372009
30068			level4			577.038	165.9	NEG													0.000196792	0.00143045	0.000849729	1.27469e-05	0.000901804	7.27723e-06	0.00114061	0.00031269	0.000540891	0.000574432	0.00100811	0.000536167	0.000202581	0.000622318	0.000757111	0.0018374	0.000225543	0.000590122	0.000479934	0.000668141	0.000644742	0.00145475	0.00153499	7.83232e-06	0.00480325	0.00118005	0.000621862	0.000749682	0.00104127
30069			level4			137.036	165.8	NEG													0.0305254	0.0144533	0.0124013	0.058237	0.0163774	0.00553578	0.0345965	0.031346	0.0276163	0.0169027	0.016993	0.0380755	0.0320193	0.064487	0.024403	0.0876762	0.0137775	0.0269037	0.0375129	0.0169882	0.0303414	0.0324881	0.0983322	0.0254221	0.0687492	0.0352672	0.0714546	0.0516256	0.0334968
30078			level4			295.025	165.8	NEG													0.000267401	7.50367e-05	8.20531e-06	0.000376013	0.000177262	7.27723e-06	0.000402766	0.000298573	0.000350776	8.6553e-06	0.000110361	0.000332285	0.000298817	0.000774944	0.000172681	0.00111997	0.000157083	0.000173354	0.000435165	0.0002182	0.000288241	0.000348445	0.0015296	0.000851571	0.000827882	0.000361839	0.0010635	0.000572629	0.000375494
30079			level4			327.996	165.8	NEG													0.00165298	0.00069094	0.00159622	0.000828796	0.00226592	7.27723e-06	0.00209506	0.00253178	0.00201252	0.00099376	0.00211056	0.00150975	0.00162103	0.00139555	0.00150286	0.00159506	0.00180297	0.00215696	0.00244849	0.00236201	0.00165903	0.00186662	0.00381319	0.000825738	0.00452818	0.00260724	0.00232325	0.00305556	0.00207622
30090			level4			377.027	165.7	NEG													0.000164579	0.000554311	0.000374841	1.27469e-05	0.000423694	7.27723e-06	0.000269188	0.000325612	0.000344156	0.000209643	0.000400721	0.000514846	0.000318714	0.000377454	0.000293396	0.000671818	0.00028917	0.000465545	0.000212705	0.000332003	0.000328121	0.000125233	0.000743859	0.000931509	0.000537074	0.000386146	0.000590367	0.000351552	0.00035314
30121			level4			238.994	165	NEG													0.00131218	0.00180611	0.00167355	0.000269236	0.00219614	0.00160751	0.00205077	0.0018184	0.00134742	0.00290432	0.00221828	0.00159633	0.00104232	0.00115143	0.00206522	0.00290799	0.0012027	0.00153262	0.000771727	0.00357599	0.00175251	0.00224334	0.00290967	0.00437992	0.0032131	0.00246445	0.0020135	0.00175076	0.002066
30155			level4			154.947	163.9	NEG													0.00471084	0.00329984	0.0053518	0.000133115	0.00698637	0.00078424	0.00549946	0.00363723	0.00587751	0.00316109	0.00509932	0.00336135	0.004463	0.00317492	0.0050982	0.00350985	0.00337699	0.00339175	0.00280018	0.00511602	0.00394165	0.00437628	0.00382556	0.00119886	0.00452668	0.00827826	0.00514526	0.00697089	0.00665047
30183			level4			284.031	163.4	NEG													0.00407487	0.00302022	0.00377552	1.27469e-05	0.00341187	0.000847665	0.00338252	0.00419704	0.0033938	0.0029426	0.00290275	0.00217794	0.00313312	0.00611659	0.00260773	0.00453697	0.00357147	0.0045488	0.00562559	0.00496874	0.00346243	0.00289645	0.00627208	0.00173306	0.00403405	0.00326753	0.00318359	0.00478153	0.00466503
30217			level4			224.011	163	NEG													0.00133133	0.000222699	0.000344688	0.000384412	0.000790349	7.27723e-06	0.000579262	0.00098709	0.000782065	0.00129932	0.000631583	0.0011634	0.000657661	0.00194732	0.0008803	0.004065	0.000675953	0.00316438	0.000576213	0.00185504	0.00111727	0.000768741	0.00624855	7.83232e-06	0.00249484	0.000483397	0.000524323	0.000551353	0.00294507
30224			level4			306.014	163	NEG													0.00082196	8.89294e-06	0.000265772	1.27469e-05	0.000324584	7.27723e-06	0.000252192	0.000456863	0.000250559	0.00070871	0.000300334	0.000461748	0.000219523	0.00115108	0.000333547	0.00211123	0.000286885	0.00160764	0.000306737	0.000875475	0.000538188	0.000524591	0.00308778	0.000420829	0.00137821	7.9717e-05	0.000328037	0.000133889	0.00164333
30262			level4	3,5-Dichlorocatechol	-14.6558	177.991	162.3	NEG													0.000774699	0.000770547	0.000771801	0.00183456	0.000886748	6.59686e-05	0.000695801	0.00120964	0.000591753	0.000702611	0.000891024	0.00114411	0.000846257	0.000769853	0.000942858	0.00107034	0.000879264	0.00108962	0.00053269	0.000236059	0.00083531	0.000872696	0.000895943	0.00170311	0.00118683	0.000279241	0.00150399	0.00084657	0.00105703
30359			level4			580.014	159.9	NEG													0.00274957	0.00025417	0.00237512	1.27469e-05	0.0057706	0.00112184	0.00935938	0.00271221	0.00311526	0.00105869	0.00469957	0.00265402	0.00968871	0.00262541	0.00815526	0.00144667	0.00640969	0.00208824	0.00303278	0.00283715	0.00360835	0.004205	0.000415874	0.00137537	0.00137355	0.000548597	0.00324668	0.00408516	0.00351899
30362			level4			434.13	159.8	NEG													0.000569073	0.000174362	4.79857e-05	0.000141303	0.000379991	0.000301261	8.24451e-06	0.000673524	7.80179e-05	0.000667163	8.53913e-06	4.51424e-05	8.05552e-06	0.000710367	7.9958e-06	0.00114317	7.78735e-06	0.00046978	6.36789e-05	0.000285834	0.000289564	0.000277467	0.00359583	7.83232e-06	0.000598232	8.15558e-06	0.000216444	0.000316117	0.000200479
30446			level4			627.046	157.1	NEG													0.00343381	0.00137569	0.00553209	1.27469e-05	0.00637314	0.00386685	0.00485918	0.0035564	0.0054172	0.00172744	0.00686137	0.00241765	0.00504096	0.00448948	0.00663654	0.00435289	0.00700277	0.00315847	0.00399065	0.00264788	0.00413766	0.00323775	0.00137444	0.00402069	0.00152851	0.000218774	0.00338948	0.00527068	0.00328968
30457			level4			643.02	156.8	NEG													0.0018744	0.000596649	0.003556	1.27469e-05	0.00468899	0.00306821	0.00561842	0.00215649	0.00313336	0.00127792	0.00432298	0.00164785	0.00289096	0.00257599	0.00517629	0.00229121	0.00452875	0.00215883	0.00223706	0.00180309	0.00278081	0.00248832	0.000742672	0.0017941	0.00132812	0.000259617	0.00152675	0.00360006	0.00217905
30468			level4			529.065	156.5	NEG													0.00220972	0.00253885	0.00344252	0.00761702	0.00255979	0.00147693	0.00423893	0.00133271	0.00344473	0.000835853	0.00231243	0.00275393	0.00510919	0.00438314	0.00300207	0.00205637	0.00407602	0.00173232	0.00417186	0.000829491	0.00300619	0.00265998	0.000229038	0.0027035	0.000502389	3.54809e-05	0.00142356	0.0023005	0.00124726
30471			level4			342.995	156.4	NEG													0.00465975	0.00329729	0.00735069	0.00126671	0.0123238	0.00507322	0.0147483	0.00695117	0.00874864	0.00405659	0.00659969	0.0038732	0.00283956	0.00523249	0.00798271	0.00689072	0.00968086	0.00612934	0.00549052	0.00492014	0.00640577	0.00644718	0.00342073	0.00492139	0.00464718	0.00104956	0.00680617	0.00896599	0.00502098
30474			level4			299.968	156.3	NEG													0.00223177	0.00101187	0.000289585	0.000505268	0.00259831	0.00217376	0.00129181	0.00297084	0.00105155	0.00202549	0.000557155	0.0011635	0.00135821	0.00140704	0.000532504	0.00392364	0.00115793	0.000300074	0.00148156	0.000367859	0.00141999	0.00219893	0.00408652	0.000898308	0.00478885	0.00374773	0.000398026	0.000597171	0.0032542
30478			level4			520.999	156.3	NEG													0.0025908	0.00107198	0.00325885	1.27469e-05	0.00382837	0.00233936	0.00247979	0.00259607	0.00321682	0.00136406	0.0029515	0.00319317	0.00181982	0.00230838	0.00391849	0.00278446	0.00406203	0.00291195	0.00269232	0.00204483	0.00257229	0.00300756	0.000558501	0.00244084	0.00134877	0.000679628	0.00269471	0.00277977	0.00218683
30479			level4			546.045	156.3	NEG													0.00127814	0.00102612	0.00215665	1.27469e-05	0.00265396	0.00217492	0.0036845	0.00122022	0.00273705	0.00110082	0.00264354	0.00251529	0.0047395	0.00199283	0.00298026	0.00222987	0.00320362	0.00133397	0.00189291	0.000848765	0.00212128	0.00289345	0.000494444	0.00181011	0.000577384	0.000281669	0.00148945	0.00228331	0.0011819
30487			level4	1,1-Dichloro-2-(dihydroxy-4'-chlorophenyl)-2-(4'-chlorophenyl)ethylene	-12.3517	349.012	156.2	NEG													0.000760387	0.0021706	0.00141945	0.00386322	0.00170792	0.00111838	0.00123628	0.00181378	0.00232159	0.00291141	0.00135024	0.00102563	0.00082668	0.00124161	0.00214324	0.0012453	0.00182871	0.000963727	0.00104166	0.00128416	0.0016137	0.000743203	0.00132484	0.00104608	0.00162649	0.000725322	0.00126231	0.00197088	0.00126588
30495			level4			548.017	156.1	NEG													0.0013991	0.000819534	0.00244841	1.27469e-05	0.00313352	0.00173025	0.00353248	0.00155741	0.00257671	0.0012759	0.00273124	0.0027951	0.00486124	0.0019991	0.00288354	0.00212624	0.00400204	0.00164209	0.00182887	0.00112893	0.00222422	0.0028626	0.00042314	0.00196539	0.0010336	0.000709782	0.00191974	0.00274831	0.0015171
30503			level4			470.059	156	NEG													0.00104379	0.00085947	0.0012326	0.00179014	0.0012218	0.00121262	0.00171543	0.000582075	0.00136964	0.000752248	0.00127599	0.00164062	0.00142001	0.000996531	0.00128358	0.00124943	0.00155587	0.000526435	0.000693264	0.000583728	0.00115026	0.00174095	0.000490452	0.00113986	0.000333218	8.15558e-06	0.000809964	0.00120648	0.000651742
30506			level4	5-(3-(4-(2-Chlorophenyl)-9-methyl-6H-thieno(3,2-f)(1,2,4)triazolo(4,3-a)(1,4)diazepin-2-yl)-2-propynyl)phenanthridin-6(5H)-one	-0.775387	545.042	156	NEG													0.0088302	0.00841393	0.01508	0.000559806	0.0164805	0.0114721	0.0230686	0.00926779	0.0150347	0.00691494	0.0145727	0.0122423	0.0222752	0.0126443	0.016507	0.0139717	0.0189355	0.00931835	0.010637	0.0071438	0.0126685	0.0157987	0.00360957	0.0113246	0.00471459	0.000200966	0.00936604	0.0136842	0.00820953
30510			level4			750.064	156	NEG													0.0011281	0.00106414	0.00215771	1.27469e-05	0.00258112	0.00145011	0.00380816	0.00105918	0.00276707	0.000711948	0.00237306	0.00201038	0.00480571	0.00199694	0.00277229	0.00227431	0.00366895	0.00121678	0.00178639	0.000795077	0.00202201	0.00263402	0.000323918	0.00189256	0.000233684	8.15558e-06	0.00114826	0.00212596	0.00110857
30521			level4			166.009	155.8	NEG													0.000558448	0.00204129	0.00100873	0.00224677	0.00134576	0.00634174	0.00281478	0.00699127	0.00190367	0.000604312	0.00150291	0.00619119	0.00381127	0.000846851	0.00191465	0.00197429	0.00142083	0.000537711	0.00088671	0.0062405	0.00255918	0.00204148	0.000919323	0.00108931	0.0073199	0.00633112	0.000464722	0.000784802	0.00058432
30535			level4			471.036	155.7	NEG													0.000350268	0.000141751	0.00108047	1.27469e-05	0.00109833	0.00101619	0.00146087	0.000404321	0.000976954	0.000139922	0.000944342	0.000625878	0.00126848	0.00080276	0.00081129	0.000911529	0.00133365	0.000511286	0.000290164	0.000395841	0.000728852	0.000742522	8.63912e-05	0.000674301	0.000204348	8.0252e-05	0.000689966	0.000991399	0.000537762
30553			level4			460.986	155.6	NEG													0.00575626	0.0072025	0.00900024	0.000372563	0.0110052	0.00721347	0.00577898	0.00626268	0.00852111	0.00421736	0.00851827	0.00890189	0.00450674	0.00602225	0.00876205	0.00727462	0.00800701	0.00708724	0.00627408	0.00502249	0.00678535	0.00472234	0.00256225	0.00658153	0.00360185	0.00105799	0.00647056	0.00724228	0.00589456
30554			level4			469.056	155.6	NEG													0.00742737	0.0100107	0.0093599	0.00339241	0.00990778	0.0101785	0.0145127	0.00684045	0.0107764	0.0075276	0.0100747	0.0112263	0.0149592	0.00832099	0.0106021	0.0106097	0.010672	0.00648372	0.00676419	0.00579213	0.00927194	0.0128254	0.00525867	0.00876747	0.00506888	0.000184267	0.00599158	0.0097435	0.00646004
30570			level4	SM(d17:1/PGJ2)	3.48951	766.037	155.6	NEG													0.000613918	0.000269329	0.00136632	1.27469e-05	0.00209413	0.00112954	0.00311831	0.000826814	0.00181317	0.00034149	0.0020806	0.00113609	0.00130314	0.0012141	0.0022877	0.00141984	0.0018246	0.0010169	0.00103757	0.000463961	0.00126851	0.00197214	0.000156908	0.000999004	0.000269844	3.72955e-05	0.000777259	0.00130838	0.000678164
30593			level4	DG(16:0/0:0/22:4n6)	4.61473	644.018	155.5	NEG													0.00137212	0.00192821	0.00252779	1.27469e-05	0.00296686	0.00196056	0.00403178	0.00120064	0.00291354	0.000540221	0.00271192	0.00413244	0.0044125	0.00163707	0.00277667	0.00275133	0.0032356	0.00164276	0.00183361	0.000713692	0.0022651	0.00250959	4.7748e-05	0.0027909	0.000388166	4.30206e-05	0.00171854	0.00189692	0.001085
30603			level4			409.035	155.4	NEG													0.00981532	0.00845086	0.0145357	0.00131341	0.0169638	0.01299	0.0208272	0.00907203	0.015805	0.00738367	0.015396	0.0178112	0.0215511	0.0126361	0.0169357	0.0144252	0.0195929	0.0103255	0.0107042	0.00781534	0.0132175	0.0165775	0.00458097	0.0126437	0.00583499	0.000209611	0.0091366	0.015548	0.00956522
30617			level4	DG(20:3(5Z,8Z,11Z)/22:6(4Z,7Z,10Z,13Z,16Z,19Z)/0:0)	12.5557	690.051	155.4	NEG													0.00120439	0.00116107	0.00255624	1.27469e-05	0.00277825	0.00204517	0.00396643	0.001018	0.00261316	0.00072054	0.00273606	0.00112307	0.00320442	0.00160179	0.00358906	0.00212042	0.00255722	0.00166524	0.00120772	0.000966485	0.00194237	0.00284005	0.000534124	0.00167101	0.000348943	4.44482e-05	0.00078827	0.00199389	0.00111913
30624			level4			425.01	155.3	NEG													0.0060162	0.00570635	0.0102684	0.000927142	0.0138852	0.00896126	0.0154044	0.00604371	0.0100993	0.00364077	0.0109154	0.00521637	0.0123104	0.00775043	0.0131435	0.0095425	0.0103999	0.00784867	0.00661067	0.0054274	0.0085059	0.0117669	0.00250431	0.00644197	0.00342381	0.000698806	0.00428459	0.0106055	0.00626235
30626			level4			489.007	155.3	NEG													0.0013443	0.00104847	0.00204393	1.27469e-05	0.00299707	0.00165543	0.00373661	0.00116155	0.00236028	0.000637564	0.00241763	0.00261442	0.00257135	0.00150693	0.00257512	0.00181343	0.00243243	0.0014604	0.00112074	0.000864095	0.00181873	0.002218	0.000450792	0.00135815	0.000406336	0.000200721	0.000888037	0.00213061	0.000967344
30627			level4			491.038	155.3	NEG													0.00190331	0.00116624	0.00264037	1.27469e-05	0.00332132	0.00195731	0.00360701	0.00197651	0.00288027	0.00127455	0.00300556	0.00123808	0.00175364	0.00233424	0.00324338	0.00219217	0.00372845	0.00174877	0.00183973	0.00182383	0.00218237	0.0019658	0.000807323	0.00233947	0.00120134	3.11496e-05	0.00222597	0.0033264	0.00200279
30630			level4			614.057	155.3	NEG													0.000550631	0.000251971	0.000840251	1.27469e-05	0.00117093	0.000654784	0.0017045	0.000231117	0.00118792	0.000239765	0.00107343	0.000447379	0.00158241	0.000872491	0.00153562	0.00105533	0.00164975	0.000565286	0.000807945	0.000266315	0.000835029	0.000981143	8.01715e-06	0.00100914	8.43779e-06	3.86092e-05	0.000555307	0.00109543	0.000595458
30642			level4			488.005	155.2	NEG													0.00953126	0.0112027	0.0159371	0.000167455	0.0213427	0.0130895	0.0257832	0.0097106	0.017062	0.00828276	0.0181563	0.00923647	0.0209062	0.0122608	0.0207789	0.0147078	0.0188712	0.0121322	0.0109526	0.00776732	0.0138939	0.0184466	0.00405873	0.0117271	0.00517179	0.000679399	0.00824356	0.0159251	0.00910736
30644			level4			630.028	155.2	NEG													0.000682628	0.000336392	0.0016164	1.27469e-05	0.00180813	0.0013235	0.00263834	0.000822009	0.00169126	0.000257001	0.0018831	0.00162376	0.00103388	0.00111974	0.00230252	0.000911948	0.00222519	0.000822678	0.000842577	0.000515822	0.00122348	0.00186122	8.01715e-06	0.000911939	0.000272283	0.000142412	0.000866842	0.0013202	0.000742267
30659			level4			472.031	155	NEG													0.0121072	0.0135785	0.0197779	0.000260578	0.0215004	0.0166688	0.0288158	0.0110018	0.020971	0.0107029	0.0195844	0.0227391	0.0307017	0.0156157	0.0212647	0.01818	0.0258877	0.0136691	0.0131976	0.00855683	0.0172391	0.0224763	0.00499742	0.0179773	0.00644724	0.00025683	0.0131659	0.0186417	0.0106929
30663			level4			677.052	155	NEG													0.00145412	0.00242708	0.00277222	0.000166055	0.00264562	0.00186122	0.00383109	0.000957219	0.00275693	0.00252861	0.0026644	0.00104871	0.00451327	0.0019668	0.00290841	0.00259268	0.00343575	0.00155624	0.00156775	0.000858403	0.00222563	0.00316702	9.72031e-05	0.00243059	0.00100941	0.000160696	0.00158564	0.00209979	0.0011068
30664			level4			267.01	154.9	NEG													0.0452416	0.0478145	0.0652152	0.0106335	0.0744941	0.0516648	0.0855978	0.0468831	0.0717817	0.043751	0.0705335	0.0820171	0.0469056	0.0554075	0.0719983	0.052206	0.0858008	0.0547859	0.0583257	0.0451812	0.0583119	0.0686121	0.0253041	0.0560786	0.0328896	0.0126583	0.0515546	0.0750491	0.0489688
30668			level4			693.026	154.9	NEG													0.00184376	0.00195994	0.00334548	1.27469e-05	0.00398527	0.00228775	0.00569637	0.00151462	0.00313323	0.000801755	0.0036192	0.00146255	0.00454704	0.00241918	0.00418563	0.003327	0.00428588	0.00220556	0.0018775	0.00114001	0.00268252	0.00361293	0.00047402	0.00239551	0.000565806	8.15558e-06	0.00123656	0.00286116	0.00141185
30676			level4	DG(19:0/18:1(12Z)-O(9S,10R)/0:0)	21.9294	650.033	154.8	NEG													0.00117688	0.000728943	0.00184844	1.27469e-05	0.00177275	0.00177952	0.00143789	0.000908804	0.0021863	0.000939465	0.00179128	0.000759288	0.00136261	0.00121474	0.0018412	0.00156716	0.00216072	0.00112391	0.00124312	0.000698179	0.0013277	0.00158452	5.03861e-05	0.00189794	0.000122318	3.19266e-05	0.0014434	0.00134118	0.00106944
30677			level4	DG(13:0/LTE4/0:0)	-17.7789	709	154.8	NEG													0.000365959	0.000361484	0.00127485	1.27469e-05	0.00190475	0.000626949	0.00236871	0.000719329	0.00124674	0.000418192	0.00149692	0.00100021	0.00173124	0.000833164	0.00187147	0.00114958	0.00124509	0.000833704	0.000377809	0.000418155	0.00101285	0.00139083	0.000103791	0.000810754	0.000196047	8.15558e-06	0.00034744	0.000995843	0.000858095
30698			level4			338.127	154.2	NEG													0.00209118	0.00304317	0.0028891	0.00165134	0.00323975	0.00295629	0.00414939	0.0022001	0.00305444	0.00288029	0.00316128	0.00356349	0.00356207	0.00248757	0.00281548	0.00246199	0.00263762	0.00200486	0.00238511	0.00194309	0.00275888	0.00348046	0.00128815	0.00300744	0.00179286	0.000359075	0.00180858	0.00321728	0.00185741
30709			level4			496.116	154	NEG													0.00188425	0.00170144	0.00276589	0.0013413	0.0028424	0.0030799	0.00287075	0.00201899	0.00258932	0.00194642	0.00257308	0.00126348	0.00209748	0.00228957	0.00242733	0.00145079	0.00266337	0.00176419	0.00206073	0.00193743	0.00217841	0.00232014	0.0012629	0.00244087	0.001816	0.000354698	0.00191849	0.00299996	0.0019232
30716			level4			578.119	153.9	NEG													0.00102338	0.000535831	0.000719586	0.00022535	0.00150092	0.00143774	0.000995918	0.00146567	0.000842365	0.00117111	0.000980859	0.000403828	0.000773527	0.000996628	0.00132143	0.00030662	0.0011512	0.00078377	0.00133837	0.00118031	0.00095772	0.000749825	0.000187337	0.000726579	0.000806803	0.000337255	0.000853022	0.00152732	0.00120892
30721			level4			280.104	153.7	NEG													0.00974048	0.00184101	0.016034	0.00605519	0.00837694	0.00452212	0.0113021	0.00778307	0.000733442	0.00925461	0.00140908	0.00534636	0.00186898	0.0156929	0.00204063	0.0329074	0.000938716	0.00352864	0.00482769	0.0113255	0.00777645	0.0111287	0.111223	0.0127078	0.0624595	0.00216739	0.0035494	0.0143325	0.00476987
30732			level4			283.078	153.6	NEG													0.162328	0.031162	0.221844	0.0205102	0.127171	0.0606126	0.200159	0.101963	0.00946063	0.152826	0.0349581	0.0848822	0.0200291	0.171753	0.0308765	0.384099	0.0108728	0.037546	0.0783576	0.124572	0.103299	0.215827	1.05694	0.0321017	1.0004	0.0417853	0.0497709	0.267899	0.0711055
30740			level4			220.083	153.5	NEG													0.0110145	0.00528082	0.0122588	0.00941982	0.00776531	0.00446395	0.00929276	0.00543619	0.00132608	0.00851216	0.00178162	0.00454417	0.000584015	0.0127244	0.00193956	0.0250803	0.00268659	0.00778424	0.00423149	0.00802448	0.00720757	0.0122415	0.0871969	0.00328394	0.0703526	0.00211219	0.00330296	0.0155932	0.00391902
30741			level4	Pyrrolnitrin	-24.5977	256.059	153.5	NEG													0.184551	0.0205331	0.0248665	0.0352495	0.093067	0.0748875	0.140381	0.103148	0.00707011	0.128839	0.030201	0.0832686	0.0151308	0.169137	0.0263499	0.367515	0.00859535	0.0273934	0.0656837	0.126536	0.0866201	0.131189	1.08054	0.023707	0.965375	0.0245003	0.0592378	0.168378	0.0530079
30745			level4			257.063	153.4	NEG													0.0158307	0.00149329	0.0144291	0.00269329	0.00623002	0.00603894	0.0121547	0.00815923	0.000188886	0.0103066	0.00187109	0.00569683	0.000430379	0.0126077	0.00129738	0.0317146	0.000128797	0.00160713	0.00367132	0.0113766	0.00739632	0.0125289	0.0941375	0.00212794	0.0845553	0.00170759	0.00468769	0.0144419	0.00307142
30746			level4	1-hydroxy-2-methyl-2-(E)-butenyl 4-diphosphate	-17.4603	258.056	153.4	NEG													0.0587977	0.00645229	0.0592986	0.0108793	0.029378	0.0268453	0.0458284	0.0366699	0.00215966	0.0418957	0.00903624	0.0233559	0.00433707	0.0472441	0.00853542	0.12078	0.00260521	0.00891385	0.0163249	0.0432094	0.0301273	0.041116	0.368483	0.00795966	0.313856	0.00789027	0.0182957	0.0648741	0.0172231
30747			level4	N-(3,5-Dichlorophenyl)-2-hydroxysuccinimide	-11.6253	259.06	153.4	NEG													0.00499342	0.00129805	0.00447221	0.00205508	0.0019823	0.0025734	0.00330041	0.00282271	0.000349876	0.00422964	0.00173732	0.00262278	0.00106402	0.00424088	0.00155211	0.0103985	0.000547559	0.00307471	0.00163325	0.00252489	0.00287365	0.00437715	0.0303738	0.000911325	0.0276033	0.00133531	0.00186347	0.00523925	0.0015813
30761			level4			365.188	153.1	NEG													0.00035827	0.000265115	0.00027313	1.27469e-05	0.000326789	0.000401029	0.000192583	0.000521041	0.000261104	0.000477328	0.000397444	0.000285994	0.000264167	0.000277617	0.000321884	0.000195686	0.000203305	0.000210034	0.000178116	0.000357763	0.000289057	0.000255916	0.000653204	0.000354827	0.000368794	0.000602874	0.00037681	0.000390212	0.000595953
30768			level4			289.201	153	NEG													0.000640183	0.000437267	0.000315754	0.000320351	0.000658024	0.000639104	0.000458734	0.000764965	0.000646608	0.000671186	0.00064163	0.000481746	0.000258139	0.000473115	0.000498555	0.000439363	0.000399286	0.000425239	0.000455928	0.000649936	0.000513756	0.000425376	0.000631307	0.000433734	0.00079873	0.00132484	0.000600329	0.000708979	0.000625667
30772			level4			389.072	153	NEG													0.0015693	0.00236681	0.00194134	0.0045222	0.00141005	0.00102014	0.000687886	0.00158973	0.00272434	0.00165013	0.00240849	0.00485483	0.00407306	0.000454219	0.00242376	0.000647796	0.000531932	0.000908032	0.000447899	0.00177579	0.00190039	0.000648428	0.00107757	0.00044533	0.00138864	0.00279019	0.000735369	0.00102249	0.0013549
30778			level4			320.167	152.8	NEG													0.000441992	0.000173641	0.000137356	1.27469e-05	0.000223166	7.27723e-06	8.0794e-05	6.31381e-05	0.000337155	8.6553e-06	8.53913e-06	0.000943266	0.000187743	0.000428606	7.9097e-05	0.000981931	7.78735e-06	0.000938049	0.000121127	0.000418232	0.000280015	0.000351938	0.00155925	0.000436002	0.000897963	0.000159429	0.000534786	0.000401328	0.000522677
30782			level4			396.207	152.7	NEG													0.000503201	5.40387e-05	0.000215001	0.00133943	0.000410331	0.000179467	8.24451e-06	0.000722088	0.000240418	0.000391158	5.49158e-05	0.000603703	0.000108929	0.000474948	5.58412e-05	0.000732579	7.78735e-06	0.000394477	0.000148622	0.0006229	0.000363404	0.00042257	0.000847499	0.0003345	0.000407457	0.000336804	0.000200755	0.000313702	0.000515165
30798			level4	Dipicrylamine	17.4782	438.209	151.3	NEG													0.000677459	8.89294e-06	8.20531e-06	0.000129928	8.45926e-06	7.27723e-06	8.24451e-06	8.36801e-06	8.21932e-06	8.6553e-06	8.53913e-06	8.28813e-06	8.05552e-06	0.000130235	7.9958e-06	0.00545525	7.78735e-06	0.000181646	8.22997e-06	5.44752e-05	0.000337211	8.46404e-06	0.0152142	7.83232e-06	0.0136875	8.15558e-06	7.94877e-06	8.51141e-06	8.48302e-06
30809			level4			147.045	150.9	NEG													0.00380048	0.00186849	0.00229907	0.00524594	0.00185721	0.000792318	0.00109134	0.00261709	0.00282716	0.000791222	0.00102352	0.0078069	0.00240059	0.00431794	0.00181855	0.0102379	0.0007849	0.00720873	0.00150986	0.00337593	0.00318376	0.00442576	0.0108649	0.00342307	0.00662905	0.000436588	0.0040665	0.00338543	0.00337033
30819			level4			327.093	150.8	NEG													0.0380387	0.0476213	0.0235886	0.00837328	0.0244295	0.0075509	0.0130228	0.0316478	0.00925263	0.032731	0.00296492	0.015228	0.0190091	0.0319321	0.0168971	0.0543649	0.00962718	0.111453	0.0120396	0.0294385	0.0269605	0.0781491	0.143554	0.0150749	0.0191796	0.00723969	0.0227416	0.0163316	0.0288174
30820			level4			385.161	150.8	NEG													0.00166661	8.89294e-06	0.000748606	0.00356244	0.000467578	7.50227e-05	0.000417261	0.000420302	3.56667e-05	0.000440935	8.53913e-06	0.0012674	8.05552e-06	0.00137492	0.000116765	0.008044	7.78735e-06	0.000499221	9.08819e-05	0.00101072	0.00101358	0.00160182	0.0322643	0.000155752	0.0183765	8.15558e-06	0.000167367	0.00208478	0.00063521
30829			level4	IDP	-14.5343	427.172	150.7	NEG													0.00266369	0.000470387	0.00131778	0.00197998	0.0014794	0.000478972	0.000296544	0.00240624	0.000682549	0.000373751	0.00020665	0.00212778	0.00068061	0.00336796	0.000755119	0.0103274	8.88843e-05	0.00676899	0.000383634	0.00352494	0.00201906	0.0021669	0.0109906	0.00118728	0.00346701	0.000131749	0.00205421	0.00174122	0.00280656
30834			level4			262.048	150.6	NEG													0.00264931	0.00140615	0.00186642	0.00267322	0.0019872	0.000607693	0.00152959	0.0022949	0.00193973	0.00103227	0.00161535	0.00464577	0.00114877	0.00285314	0.00172192	0.00647847	0.00149431	0.00639726	0.000771397	0.00304818	0.00240805	0.00347818	0.00689819	0.00215003	0.00633031	0.000546437	0.00281144	0.00300789	0.00342145
30838			level4			328.078	150.6	NEG													0.00111875	0.000769067	0.000790111	0.00160873	0.000604802	0.000469582	0.000513014	0.000990505	0.00118475	0.000395241	0.000380476	0.00248501	0.000862596	0.00149023	0.000841476	0.00318211	0.000328071	0.00257263	0.000673684	0.00148998	0.00113754	0.00168864	0.00452799	0.0016076	0.00272148	0.000309022	0.00138008	0.00155619	0.001689
30878			level4			407.038	150	NEG													0.000418612	0.000205982	0.000184601	1.27469e-05	0.000422929	0.00012586	0.000293362	0.000311588	0.000514362	7.44706e-05	0.000159586	0.000781311	0.000292831	0.000547106	0.000327491	0.000998908	0.000227524	0.00101368	0.000188032	0.000534931	0.000381796	0.000528153	0.00114554	0.000620948	0.00100956	7.10838e-05	0.000663467	0.000517363	0.000663375
30885			level4			416.096	149.4	NEG													0.00212795	0.00401248	0.00426935	0.00320021	0.00127715	0.000289101	0.000725802	0.00321165	0.000272657	0.00277275	0.000336473	0.00114884	0.000561794	0.00293988	0.000589409	0.0116618	8.77528e-05	0.00178494	0.000673794	0.00334876	0.00226463	0.0057901	0.0171005	0.000530234	0.00278423	0.000144766	0.00249805	0.00255483	0.00139477
30892			level4			237.973	149.1	NEG													0.000863489	0.000779618	0.000988067	0.00326364	0.000986643	0.000337764	0.000766384	0.00150065	0.000572143	0.00158522	0.000725997	0.00150429	0.000618416	0.00144361	0.000697158	0.00106984	0.000329007	0.000689583	0.00124726	0.000885479	0.00104271	0.00274362	0.00418501	0.000937133	0.00192915	0.000782049	0.00143708	0.00119641	0.000818054
31074			level4	4-Demethylpremithramycinone	-14.0467	399.323	141	NEG													6.99124e-05	8.89294e-06	8.20531e-06	1.27469e-05	8.45926e-06	0.000133364	5.69167e-05	8.36801e-06	4.07932e-05	5.2867e-05	8.53913e-06	0.00014599	0.000191305	0.000630021	0.000347446	0.001601	0.000563246	0.000708096	0.000293019	6.39085e-05	0.000247655	8.46404e-06	0.0118224	0.000107341	0.000530628	8.15558e-06	8.09589e-05	0.000241648	8.48302e-06
31120			level4			117.056	138.7	NEG													0.00247451	0.00247857	0.00161298	1.27469e-05	0.00212658	0.00218276	0.00322111	0.0025662	0.00173685	0.0022061	0.00185956	0.0030865	0.00215385	0.00275337	0.00151293	0.00921754	0.00137464	0.00817175	0.00166597	0.00184973	0.00271321	0.00383885	0.00633423	0.00257994	0.00262574	0.00232632	0.00268289	0.0023395	0.0036526
31192			level4			103.035	132.7	NEG													2.01479	1.10011	1.96166	1.7044	0.0112559	2.00639	2.02137	2.02508	2.04307	2.29611	0.0186278	1.15483	1.96049	2.19761	0.0111339	1.70485	0.0101421	1.94241	0.00911002	2.07899	1.41362	2.16741	0.730405	1.77811	1.99354	1.75801	2.04086	2.08518	1.9071
31202			level4	ATP	-20.7488	506.163	131.7	NEG													7.90341e-06	8.89294e-06	0.000597522	1.27469e-05	0.000317915	7.27723e-06	7.44164e-05	0.000902161	8.21932e-06	8.07249e-05	8.53913e-06	0.000306427	0.000773522	0.000668373	8.5201e-05	0.000488022	7.78735e-06	8.70338e-06	8.22997e-06	0.000332959	0.000235277	0.000598142	0.0019938	7.83232e-06	0.000117812	8.15558e-06	0.00075694	0.000203419	0.00030131
31364			level4			537.256	119.7	NEG													7.90341e-06	8.89294e-06	0.000104369	1.27469e-05	8.45926e-06	7.27723e-06	0.000418933	0.000303752	0.000660621	0.00090085	8.53913e-06	0.000570335	0.00120016	0.000779167	0.000447625	0.00226056	0.000561446	0.000953269	0.000913054	8.15532e-06	0.000506805	0.000784918	0.00297791	0.000551248	0.00068879	8.15558e-06	7.89029e-05	0.000502437	8.48302e-06
31379			level4	Purine mononucleotide	22.2049	331.207	119.1	NEG													0.000887311	8.89294e-06	8.20531e-06	1.27469e-05	0.00038677	7.27723e-06	0.000237274	0.000875699	0.000555046	0.000510052	0.000170983	0.0014734	0.00158209	0.00222521	7.9958e-06	0.00351168	7.78735e-06	0.00470943	0.000336556	0.000454038	0.000898422	8.46404e-06	0.0178568	0.000261056	0.00926664	0.00116445	5.75198e-05	0.000601937	0.000780714
31383			level4	Lead nitrate	2.04281	330.203	119	NEG													0.0057951	0.000491516	0.000763415	1.27469e-05	0.00251939	0.000372215	0.00168046	0.00663313	0.00312015	0.00583063	0.000880336	0.00955123	0.0111408	0.0157805	0.000402423	0.0225979	0.000176453	0.0314833	0.00299458	0.0026845	0.00624554	0.000398066	0.110867	0.00200474	0.0564754	0.00716989	0.00125069	0.00424043	0.00587584
31391			level4			152.021	118.3	NEG													0.000919532	0.00114143	0.000807736	0.00104402	0.000569794	0.00126376	0.00102063	0.00153681	0.0010655	0.000370176	0.00143826	0.00221255	0.000639772	0.00134394	0.00161509	0.000899816	0.00129416	0.00113725	0.00113413	0.00130167	0.0011378	0.00115326	0.00193229	0.000974455	0.00126679	0.00111799	0.00158786	0.00108976	0.00176824
31429			level4			364.187	117	NEG													0.00136338	8.89294e-06	0.000460919	1.27469e-05	6.53498e-05	7.27723e-06	0.000334768	0.000692199	0.00112472	8.6553e-06	8.48349e-05	0.00262605	0.000572923	0.0012332	7.9958e-06	0.00592928	7.78735e-06	0.00364438	0.000361715	8.15532e-06	0.000927762	9.01162e-05	0.00310755	0.00088205	0.00266257	0.00085233	8.30529e-05	0.000913738	0.00102155
31456			level4			842.591	116.5	NEG													7.90341e-06	8.89294e-06	8.20531e-06	1.27469e-05	5.48294e-05	7.27723e-06	8.24451e-06	8.36801e-06	8.21932e-06	8.6553e-06	8.53913e-06	0.000291272	9.55634e-05	8.43665e-06	0.000907235	0.00582336	0.00118184	0.000234176	8.22997e-06	0.000148329	0.000442016	8.46404e-06	0.00790704	7.83232e-06	0.000831762	8.15558e-06	7.94877e-06	0.000350997	8.48302e-06
31482			level4			554.346	116	NEG													0.0123093	0.0112594	0.000986449	0.0207993	0.00101432	0.000902432	0.00446984	0.00573597	0.0074235	0.00339434	0.00054363	0.00563478	0.0072913	0.0084172	0.0136334	0.0501578	0.00831193	0.00687917	0.0156397	0.00494845	0.00948761	0.0218628	0.0138334	0.0101762	0.016835	0.000288435	0.00235492	0.00721681	0.00165688
31580			level4			295.156	115.2	NEG													0.00102661	0.000307766	0.000284566	1.27469e-05	0.000336557	8.44573e-05	0.000629821	0.000835719	0.000263063	8.6553e-06	8.53913e-06	0.00148964	0.00112292	0.00113897	0.000565428	0.00133446	0.000516197	0.000785778	0.000666953	0.000432738	0.000592579	0.00057999	0.00365802	0.000847764	0.00287868	0.000350774	0.000697525	0.000492128	0.00060361
31583			level4	4-[2,2-Dichloro-1-(4-methoxyphenyl)ethenyl]phenol	2.29231	294.154	115.1	NEG													0.0108492	0.00202333	0.00427229	0.00655679	0.00346997	0.00306064	0.00485871	0.00561818	0.00410655	0.00589383	0.0020696	0.0152698	0.0125408	0.0131377	0.00547776	0.0138384	0.00134992	0.00755393	0.00274727	0.00338835	0.00640415	0.00464035	0.035547	0.0118115	0.0323607	0.000959791	0.00612531	0.00212567	0.00813958
31609			level4	Dehydrochloramphenicol	-13.1525	320.099	115	NEG													0.0012818	0.00142065	0.00246177	0.00115845	0.00118885	0.000553236	0.00045018	0.0016047	0.0008625	0.0012815	0.000396884	0.000739334	0.00146151	0.00387681	0.000679764	0.00679827	5.44646e-05	0.00128752	0.00052354	0.00223817	0.001516	0.000492723	0.00881215	0.00210072	0.0010817	0.000134243	0.00239082	0.000767987	0.00100584
31623			level4			556.251	115	NEG													0.00257078	0.000319076	0.000946834	1.27469e-05	0.000573147	0.000217551	0.00102889	0.00154739	8.21932e-06	8.6553e-06	8.53913e-06	0.00170821	0.00150368	0.00446487	0.000651805	0.00498951	0.000808638	0.00161392	0.00164902	0.00108751	0.00128595	0.000761341	0.0177336	0.00162889	0.00588769	8.15558e-06	0.00105159	0.000598766	0.00115124
31647			level4	2-Amino-7,8-dihydro-4-hydroxy-6-(diphosphooxymethyl)pteridine	-4.28959	354.13	114.8	NEG													0.0012362	0.00502301	0.00519637	0.00252718	0.00195355	0.00201097	0.00135693	0.00158876	0.00209184	0.00726422	0.000372802	0.00222979	0.00288846	0.00668795	0.00158735	0.0156391	0.000133871	0.000567265	0.000487266	0.00440306	0.0032623	0.00260926	0.014951	0.0045828	0.00279589	0.000328083	0.00479468	0.00163513	0.00120998
31692			level4			477.282	113.6	NEG													0.00580625	0.00141657	0.000338939	1.27469e-05	0.000313715	0.000321215	0.00494864	0.00195625	0.000632077	0.00271087	8.53913e-06	0.00837331	0.00205033	0.00190675	0.000784936	0.00924954	0.000944284	0.00332003	0.000781563	0.000524522	0.00232005	0.0019181	0.0250618	0.0015377	0.00239493	0.000224737	0.000118962	0.000935888	0.000860864
31706			level4			864.568	113.1	NEG													0.00222658	8.89294e-06	0.000673501	1.27469e-05	0.000818924	0.00104888	0.00323878	0.0012953	0.00196409	0.00197816	7.51733e-05	0.00622728	0.00320152	0.00989696	0.00679423	0.0573745	0.00742193	0.0142937	0.00523597	0.00125637	0.00625218	0.0044938	0.0408123	0.00367007	0.00966265	6.39668e-05	0.00122207	0.00420182	0.00107932
31707			level4			865.572	113.1	NEG													0.000360065	8.89294e-06	8.20531e-06	1.27469e-05	8.77032e-05	7.27723e-06	0.000586488	0.000110068	0.000634886	8.6553e-06	8.53913e-06	0.00132319	0.000522565	0.00302876	0.001979	0.0156283	0.00204442	0.00379368	0.00101444	0.000140653	0.00156543	0.00108208	0.0113876	0.000906588	0.00284468	8.15558e-06	0.00020912	0.00125514	0.000375815
31726			level4			478.294	112.8	NEG													0.042971	0.00814157	0.00422085	1.27469e-05	0.00273707	0.00323662	0.0271973	0.0138918	0.00663949	0.0102115	0.00110357	0.07325	0.0264334	0.042329	0.0148238	0.0662459	0.0106557	0.090885	0.00618694	0.00748925	0.0229331	0.0258876	0.187685	0.0218412	0.0399765	0.00156109	0.00289877	0.0116972	0.00665441
31743			level4			479.297	112.3	NEG													0.0110968	0.0016183	0.000955434	1.27469e-05	0.000608441	0.0006881	0.00738107	0.00386782	0.00127079	0.00200148	8.53913e-06	0.0147421	0.00576057	0.00635669	0.00334931	0.0188912	0.0028189	0.0147238	0.00326213	0.00184476	0.00506295	0.00893009	0.0472843	0.00502817	0.0103158	0.000321677	0.000589823	0.0028755	0.0027641
31769			level4			560.298	111.8	NEG													0.00261227	0.000138438	8.20531e-06	0.000436738	8.45926e-06	7.27723e-06	0.00150838	0.000820945	0.000256261	8.6553e-06	8.53913e-06	0.00234389	0.000831451	0.00100293	0.000463828	0.00195349	0.000727915	0.00192082	0.000423205	0.000315442	0.000789857	0.0014414	0.00777596	0.00098929	0.00215109	7.46346e-05	7.94877e-06	0.000786282	0.000345829
31777			level4			741.394	111.7	NEG													0.00209159	8.89294e-06	8.20531e-06	1.27469e-05	8.45926e-06	7.27723e-06	0.000192673	0.000885201	8.21932e-06	8.6553e-06	8.53913e-06	0.000814606	0.000351059	0.00197259	7.9958e-06	0.00431551	6.64055e-05	0.0016228	8.22997e-06	0.000105175	0.000625242	0.000768735	0.0131963	0.000243024	0.00104916	8.15558e-06	7.94877e-06	8.51141e-06	0.00031024
31792			level4			503.298	111.6	NEG													0.00119543	0.000132365	8.20531e-06	1.27469e-05	8.45926e-06	7.27723e-06	0.000349067	0.000163252	8.21932e-06	8.6553e-06	8.53913e-06	0.000751163	0.000106598	8.43665e-06	7.9762e-05	0.00154984	6.56039e-05	0.00119858	8.22997e-06	8.15532e-06	0.000283929	0.000384445	0.00620847	8.74659e-05	0.000778463	8.15558e-06	7.94877e-06	0.000455627	8.48302e-06
31812			level4			549.104	111	NEG													0.00151819	0.000482258	0.00104782	0.00161935	0.00105256	0.00117879	0.000764554	0.000822181	0.00100574	0.00132397	0.000868702	0.000924772	0.000452309	0.000764803	0.000743858	0.001202	0.000753084	0.00115564	0.000796501	0.00120307	0.000984007	0.00128031	0.000602098	0.000989719	0.00088924	0.00113818	0.000709635	0.000890931	0.000750362
31825			level4			501.282	110.9	NEG													0.0105773	0.00120515	0.000904723	0.0063073	9.93096e-05	7.27723e-06	0.00330188	0.00308503	0.000101992	0.000493673	8.53913e-06	0.0117502	0.00408731	0.00484433	0.00141909	0.00665078	0.00137121	0.0100037	0.00261977	0.0010234	0.0034931	0.00337401	0.0486765	0.00449076	0.0074088	0.000864652	0.000131846	0.00367002	0.00257353
31831			level4			582.281	110.9	NEG													0.00230311	0.000959594	0.000255808	1.27469e-05	8.45926e-06	7.27723e-06	0.00079847	0.000808252	0.000265265	0.00159635	8.53913e-06	0.0020772	0.000872588	0.00113699	0.0020468	0.00157229	0.000542619	0.00216128	0.000121772	0.000687032	0.000912122	0.000745473	0.00889584	0.000759609	0.00174048	0.000229694	0.000317077	0.000884674	0.000786277
31838			level4			274.962	110.7	NEG													0.00448021	0.00286635	0.00277248	0.00403684	0.00404413	0.00309983	0.00314324	0.00355319	0.00319389	0.00363454	0.00794268	0.00502148	0.00455392	0.00189497	0.00413294	8.63049e-06	0.00369742	0.00319173	0.00410976	0.0032939	0.00363361	0.00323513	0.000394052	0.00389363	0.0027775	0.00371982	0.00349566	0.00366536	0.00398216
31856			level4			524.278	110.3	NEG													0.00666936	0.00227787	0.000308377	1.27469e-05	8.45926e-06	7.27723e-06	0.00187694	0.00138846	0.000551463	0.000435498	8.53913e-06	0.0072272	0.0014064	0.00132735	0.000585878	0.00172293	0.000644231	0.00679015	0.000625939	0.000299769	0.00170874	0.00183007	0.0190373	0.00168542	0.00371629	6.48784e-05	7.94877e-06	0.00130751	0.00111827
31857			level4			525.281	110.3	NEG													0.00181299	0.000491333	8.20531e-06	1.27469e-05	8.45926e-06	7.27723e-06	0.000368916	8.36801e-06	8.21932e-06	8.6553e-06	8.53913e-06	0.00187836	0.000217075	0.00013973	0.000110131	8.63049e-06	6.46782e-05	0.00182308	8.22997e-06	8.15532e-06	0.000350088	8.46404e-06	0.00570225	0.000124731	0.00062898	8.15558e-06	7.94877e-06	8.51141e-06	0.000133219
31858			level4			526.294	110.3	NEG													0.00517703	0.000554136	8.20531e-06	1.27469e-05	8.45926e-06	7.27723e-06	0.00180705	0.00107453	0.000349605	0.000147319	8.53913e-06	0.00539304	0.00144746	0.00150566	0.000218694	0.00248417	0.000464585	0.0080307	0.000904359	0.000101963	0.00148528	0.00206396	0.0183082	0.00142987	0.00274811	5.87412e-05	7.94877e-06	0.00150106	0.0010777
31859			level4			763.379	110.3	NEG													0.00229145	8.89294e-06	8.20531e-06	1.27469e-05	8.45926e-06	7.27723e-06	7.18475e-05	0.000626118	8.21932e-06	8.6553e-06	8.53913e-06	0.000468029	0.000178499	0.00104748	7.9958e-06	0.00187701	7.78735e-06	0.00195629	9.90113e-05	0.000200411	0.000445146	0.00017797	0.0147534	0.00010441	0.00103975	8.15558e-06	7.94877e-06	0.000227136	0.000262641
31886			level4			580.362	109.7	NEG													0.0328855	0.0220873	0.00958181	0.000258504	0.00496229	0.00240481	0.0364073	0.0183789	0.00510761	0.0180984	7.46218e-05	0.0750825	0.00571563	0.0350057	0.0282016	0.0684193	0.00809164	0.00931327	0.00804401	0.011431	0.0199776	0.0431692	0.0271328	0.0373309	0.0504997	0.00127927	0.00503935	0.0121554	0.00453016
31887			level4			583.338	109.7	NEG													0.00363458	0.00260404	0.000759256	1.27469e-05	0.000408403	7.27723e-06	0.0054256	0.00234358	0.000924553	0.00240319	8.53913e-06	0.0097015	0.00058683	0.003718	0.00381806	0.00436473	0.00140793	0.0010115	0.00103983	0.000934356	0.00225573	0.00552814	0.00193751	0.00427557	0.00572206	5.25863e-05	0.000411165	0.00159124	0.000859363
31896			level4	dTDP-4-oxo-2,6-dideoxy-L-allose	11.4585	529.313	109.6	NEG													0.00193098	8.89294e-06	8.20531e-06	1.27469e-05	8.45926e-06	7.27723e-06	0.000973723	0.000201743	8.72876e-05	0.000309625	8.53913e-06	0.00343654	0.000544652	0.00062167	0.000477265	0.00230624	0.0001652	0.00169853	9.71073e-05	8.15532e-06	0.000645642	0.000689778	0.0109017	0.000758113	0.00161143	8.15558e-06	7.94877e-06	0.00138281	8.48302e-06
31899			level4			581.366	109.6	NEG													0.0100657	0.0073272	0.00264267	1.27469e-05	0.00106659	0.000402108	0.0112006	0.00504294	0.00149099	0.00520915	8.53913e-06	0.0235055	0.0017674	0.0106486	0.00898135	0.0215143	0.00261179	0.00311705	0.00214397	0.00392009	0.00613396	0.0138462	0.00845537	0.0116538	0.0158516	0.000281458	0.00140119	0.00391592	0.00148639
31900			level4			582.341	109.6	NEG													0.00197848	0.0013714	0.000253241	1.27469e-05	8.45926e-06	7.27723e-06	0.00296562	0.00111692	0.000262091	0.00153117	8.53913e-06	0.00515739	0.000902867	0.00280708	0.000875806	0.00269279	0.000555396	0.00182294	0.000262243	0.000879029	0.00127357	0.00400509	0.00830756	0.00219822	0.00405298	0.000228249	0.000313673	0.00104798	0.000897472
31901			level4			584.342	109.6	NEG													0.00135118	0.000782422	8.20531e-06	1.27469e-05	8.45926e-06	7.27723e-06	0.00126204	0.000140359	7.76354e-05	0.000380793	8.53913e-06	0.00267877	8.05552e-06	0.000962056	0.000584147	8.63049e-06	5.71137e-05	8.70338e-06	8.22997e-06	8.15532e-06	0.000418176	0.001409	0.000189324	0.00115874	0.00131156	8.15558e-06	7.94877e-06	8.73365e-05	8.48302e-06
31912			level4			662.365	109.5	NEG													0.00234398	0.00157996	0.000136706	1.27469e-05	8.45926e-06	7.27723e-06	0.00242578	0.0011945	0.000245128	0.0013248	8.53913e-06	0.004642	8.05552e-06	0.00200002	0.00180547	0.00305432	0.000410309	0.000184408	0.000105034	0.00017751	0.00108375	0.00323861	0.000773409	0.00292093	0.0028806	8.15558e-06	7.94877e-06	0.000497076	0.000164234
31923			level4			137.996	109.1	NEG													0.000682624	0.000788635	0.00151512	0.00399757	0.0031526	0.000817428	0.00210203	0.0021001	0.00200908	0.00112717	0.00141835	0.000378156	0.00293691	0.00354212	0.00287469	0.00483617	0.00246352	0.00352828	0.001123	0.00300095	0.00221973	0.00146136	0.00419012	0.00287668	0.00263135	0.00248589	0.00339463	0.00299013	0.00168015
31929			level4	Proglumetacin	23.7748	843.463	109	NEG													0.000396227	8.89294e-06	0.000121757	1.27469e-05	8.45926e-06	7.27723e-06	0.000168291	0.00039362	8.21932e-06	8.6553e-06	8.53913e-06	0.000427541	8.22116e-05	0.0011484	0.000590521	0.0030136	0.000854407	0.000482047	0.00045861	0.000266731	0.000423337	0.000375215	0.00115877	8.97956e-05	0.000975046	8.15558e-06	7.94877e-06	5.92482e-05	8.48302e-06
31968			level4			602.347	108.3	NEG													0.00595772	0.00784966	0.000996934	1.27469e-05	0.000229434	0.000235303	0.00504759	0.00437748	0.000189807	0.00202159	8.53913e-06	0.0154605	0.00048574	0.00474633	0.0035957	0.00510995	0.00063205	0.00124081	0.00489666	0.00101639	0.00320555	0.00434337	0.00499371	0.00645388	0.0130788	8.15558e-06	0.000527597	0.00521977	0.000602265
31972			level4			843.54	108.3	NEG													0.000395133	8.89294e-06	0.000121255	1.27469e-05	8.45926e-06	7.27723e-06	0.00016589	0.000392682	8.21932e-06	8.6553e-06	8.53913e-06	0.000426915	8.21507e-05	0.00128703	0.000481996	0.00354619	0.000920945	0.000625354	0.000536759	0.000266425	0.000465576	0.000224276	0.00108387	8.98755e-05	0.00112689	8.15558e-06	7.94877e-06	5.86257e-05	8.48302e-06
32049			level4			174.955	107	NEG													0.0262629	0.00118089	0.0347181	0.0509952	0.00108395	0.0294503	0.0030426	0.00122016	0.00290186	0.0315199	0.00285388	0.000673294	0.00176064	0.00055776	0.00136523	0.0164792	0.00157872	0.0298294	0.000898644	0.0377224	0.0138048	0.0367076	0.0187045	0.0291422	0.036245	0.00586895	0.032598	0.00154424	0.00217343
32068			level4			860.56	107	NEG													0.00169174	0.00030865	0.000817934	0.000462957	0.00136347	0.00453958	0.00268495	0.00106752	0.00128772	0.000868507	0.000168715	0.00196784	0.00215096	0.00435383	0.00474107	0.00900834	0.00370926	0.00360593	0.00192435	0.00110926	0.00239163	0.00200609	0.00698687	0.00161704	0.00429625	0.00113725	0.00344702	0.00349166	0.00417672
32073			level4	TG(22:0/20:3(5Z,8Z,11Z)/22:0)	-9.38229	1024.68	107	NEG													0.00574329	8.89294e-06	0.000323795	1.27469e-05	0.00114366	7.27723e-06	0.0012292	0.00450847	0.000163162	0.00115529	8.53913e-06	0.00135867	0.00282816	0.0158643	0.00335783	0.0574577	0.00120965	0.0110423	0.00226126	0.00420769	0.0056946	0.00353534	0.0388635	0.00145912	0.00736026	8.15558e-06	0.0014402	0.00568706	0.00128933
32074			level4			1027.66	107	NEG													0.00134975	8.89294e-06	8.20531e-06	1.27469e-05	8.45926e-06	7.27723e-06	0.000273314	0.000928215	0.000104383	8.6553e-06	8.53913e-06	0.000217469	0.000693798	0.00264709	0.000807428	0.00433813	0.000227508	0.00193273	0.000321448	0.00111721	0.000751063	0.000733338	0.00558882	0.000163496	0.00137231	8.15558e-06	0.00032367	0.0015288	8.48302e-06
32077			level4			1106.68	107	NEG													7.90341e-06	8.89294e-06	8.20531e-06	1.27469e-05	8.45926e-06	7.27723e-06	8.24451e-06	0.000144392	8.21932e-06	8.6553e-06	8.53913e-06	8.28813e-06	0.000141353	0.00130252	0.000262774	0.00317481	7.78735e-06	0.000860233	8.22997e-06	0.000134619	0.000306607	8.46404e-06	0.00220221	7.83232e-06	0.000245127	8.15558e-06	7.94877e-06	0.00031361	8.48302e-06
32080			level4			212.042	106.9	NEG													0.00374695	0.00494151	0.00623729	0.0098279	0.00790926	0.0188167	0.00928926	0.00328676	0.00601413	0.0022731	0.00647979	0.0122504	0.0120538	0.00439265	0.00642533	0.00267254	0.00759284	0.00359677	0.00573657	0.00226944	0.00679066	0.00814253	0.00143007	0.0121974	0.00172794	0.000660247	0.00292756	0.00602928	0.00351192
32085			level4			791.586	106.9	NEG													0.000544201	8.89294e-06	8.20531e-06	1.27469e-05	0.000582136	8.88818e-05	0.000581334	0.000221013	0.0021473	0.000692421	0.000263056	0.00165157	0.00255518	0.00175073	0.001132	0.0040266	0.00305122	0.00217663	0.00119368	0.000129948	0.00114089	0.00184608	0.00255665	0.000775594	0.00132355	8.15558e-06	0.000170081	0.00579008	0.000140099
32086			level4			1025.69	106.9	NEG													0.00236791	8.89294e-06	8.20531e-06	1.27469e-05	0.000343992	7.27723e-06	0.000517607	0.00211328	0.000147284	0.000162825	8.53913e-06	0.000522598	0.00119735	0.00857928	0.00172626	0.0319036	0.00116248	0.00609148	0.00119979	0.00256	0.00303207	0.00219466	0.0221622	0.00100385	0.0038367	8.15558e-06	0.000325348	0.00258201	0.000272956
32087			level4	TG(20:1(11Z)/24:0/20:1(11Z))	-16.0778	1026.69	106.9	NEG													0.000240271	8.89294e-06	8.20531e-06	1.27469e-05	8.45926e-06	7.27723e-06	8.24451e-06	0.000409426	8.21932e-06	8.6553e-06	8.53913e-06	8.28813e-06	0.000223058	0.00295259	0.000288973	0.00976887	0.000137657	0.00130882	8.22997e-06	0.000163967	0.000779469	0.000381572	0.0105418	0.000115383	0.000909603	8.15558e-06	0.000160074	0.000678912	8.48302e-06
32102			level4			790.616	106.3	NEG													0.00350165	0.00120112	0.000196594	0.00041144	0.00151072	0.000969805	0.00376022	0.00291064	0.00253058	0.0022155	0.000704028	0.00653751	0.00412965	0.00664184	0.00608019	0.0175844	0.0121765	0.00548792	0.00656469	0.00128615	0.00432006	0.00407958	0.0179377	0.00333758	0.00836553	0.000414982	0.00200203	0.0144641	0.00221732
32111			level4			789.613	106.2	NEG													0.00897663	0.00314202	0.0022712	0.00173018	0.00379554	0.00219886	0.00873024	0.00589441	0.00544361	0.00633864	0.00163093	0.0118986	0.00865386	0.0142447	0.0131109	0.0412863	0.024722	0.0133077	0.0139228	0.00418016	0.00977397	0.00910922	0.0372175	0.00725366	0.0174672	0.00080126	0.00415478	0.030426	0.00506645
32121			level4	Gallocatechin-(4alpha->8)-epigallocatechin	15.3584	609.521	105.7	NEG													0.000202277	8.89294e-06	8.20531e-06	1.27469e-05	0.000611216	0.00307318	0.00136673	0.000203515	0.00236425	0.00416618	8.53913e-06	8.28813e-06	0.00427709	0.00991958	0.00197846	0.0106084	0.00618239	0.00711963	0.006511	0.000461785	0.00295462	0.00150249	0.0631767	0.0012123	0.0074115	8.15558e-06	0.00184224	0.00911226	8.48302e-06
32124			level4			845.676	105.7	NEG													0.00504763	0.000882135	8.20531e-06	0.00040265	0.00110266	0.000575907	0.00233555	0.00249106	0.00183875	0.00126925	0.000595164	0.000747066	0.000681336	0.00304471	0.00200525	8.63049e-06	0.00242852	0.00204161	0.0019984	0.00166685	0.00155857	0.00190557	0.00712329	0.00191464	0.0022489	8.82051e-05	0.000268965	0.0045324	0.00109982
32133			level4	Cyanidin 3-(6-p-caffeoyl)glucoside	7.97446	610.525	105.6	NEG													7.90341e-06	8.89294e-06	8.20531e-06	1.27469e-05	0.000104922	0.000953472	9.92513e-05	8.36801e-06	0.000657116	0.00136071	8.53913e-06	8.28813e-06	0.00155336	0.00319193	0.00015916	0.002983	0.00211194	0.00163037	0.00248722	8.15532e-06	0.000868178	0.0001256	0.0257881	7.83232e-06	0.00255981	8.15558e-06	0.000337753	0.00338898	8.48302e-06
32139			level4			817.644	105.6	NEG													0.00526072	0.00119813	0.000832972	0.00041744	0.00197701	0.00074007	0.00479617	0.00336607	0.00240415	0.00213734	0.000869231	0.00425184	0.00203656	0.00411676	0.00372424	0.00781489	0.00665386	0.00315362	0.00529094	0.00252409	0.0031783	0.00409754	0.0102656	0.00272159	0.00547883	0.00034894	0.00124369	0.00993002	0.00192239
32140			level4			818.648	105.6	NEG													0.00136566	0.00014297	0.000192743	1.27469e-05	0.00107354	9.79195e-05	0.00217363	0.0010756	0.00115189	0.000822488	0.00017252	0.00156488	0.000654224	0.000921989	0.00132772	0.00357492	0.00356081	0.000551852	0.00243371	0.000552938	0.00117124	0.00160474	0.00421418	0.000740808	0.00165646	8.15558e-06	0.000159696	0.00461941	0.000323025
32178			level4			873.703	104.4	NEG													0.00507969	0.000154022	8.20531e-06	1.27469e-05	0.000278253	0.000845205	0.00439274	0.00173497	0.0024467	0.00279997	8.82552e-05	0.00365802	0.00340395	0.0103341	0.00895443	0.0126295	0.00521294	0.00976134	0.00387719	0.00268796	0.00391801	0.00264018	0.0332307	0.00432467	0.00769224	6.23733e-05	0.000732935	0.0048161	0.000938494
32180			level4			96.8552	104.3	NEG													0.00127261	0.00209501	0.000724059	1.27469e-05	0.00109834	0.00233897	0.000336714	0.00141889	0.00241723	0.00246573	0.00215585	0.0033039	0.00101047	0.0015225	0.00136023	0.00112679	0.00129028	0.0011228	0.00169492	0.00163109	0.00151996	0.000750573	0.00508318	0.00166427	0.000889364	0.00104098	0.00269529	0.000935405	0.00104185
32203			level4			857.676	104.3	NEG													0.000839512	0.000184477	8.20531e-06	1.27469e-05	0.000167177	7.27723e-06	0.000514636	0.000467152	0.000350478	0.000599113	8.53913e-06	0.00164781	0.000833998	0.00240023	0.00191117	0.00430811	0.00147754	0.000985586	0.000690255	0.00038697	0.000890048	0.000195637	0.00862347	0.00113707	0.00308004	8.15558e-06	7.94877e-06	0.000679752	0.000593385
32204			level4			871.691	104.3	NEG													0.0366826	0.00669289	0.00366377	0.00362861	0.0088177	0.0102737	0.030852	0.0189645	0.0156482	0.0215044	0.0028419	0.0327934	0.0303803	0.0773086	0.0717539	0.10883	0.032881	0.0731439	0.0279219	0.0245457	0.0319565	0.0285551	0.213238	0.0350422	0.0717939	0.00255427	0.00948377	0.0354226	0.0142838
32205			level4			872.695	104.3	NEG													0.020313	0.00324853	0.00179062	0.00200724	0.00395128	0.00478137	0.0173641	0.00999719	0.00819296	0.0115603	0.00123545	0.016643	0.0167132	0.0408944	0.0368012	0.0537811	0.0186646	0.038867	0.0144398	0.0125357	0.0166891	0.0146829	0.113642	0.0200295	0.0360711	0.000870376	0.00413794	0.0180491	0.0073848
32206			level4	Cyclohex-1-ene-1-carboxyl-CoA	-2.31068	874.663	104.3	NEG													0.00425879	0.000633919	8.20531e-06	1.27469e-05	0.000669582	0.000848974	0.0048458	0.0022231	0.00220639	0.00221581	0.000115219	0.00431551	0.00440831	0.00838569	0.00948058	0.00705393	0.00476278	0.0084754	0.00336003	0.00314501	0.00357129	0.00342333	0.0141357	0.00502378	0.00786281	0.0002656	0.000417653	0.0054319	0.0014437
32208			level4			875.669	104.3	NEG													0.000994463	0.000124421	8.20531e-06	0.000279341	8.45926e-06	0.000177035	0.00197755	0.000640719	0.00120273	0.00111452	8.53913e-06	0.00219198	0.00155968	0.00405955	0.00386538	0.00285844	0.00192013	0.00285693	0.00182826	0.00109921	0.00143878	0.00158139	0.00896658	0.0021218	0.0042463	8.15558e-06	7.94877e-06	0.00224023	0.000205203
32209			level4			953.694	104.3	NEG													0.00209934	8.89294e-06	8.20531e-06	1.27469e-05	8.45926e-06	9.69691e-05	0.00192273	0.000186393	0.000750103	0.000754579	8.53913e-06	0.00146193	0.00100825	0.00368124	0.00443785	0.00201008	0.00161637	0.00335244	0.00181652	0.00116017	0.00132009	0.00115939	0.00743464	0.00202468	0.00421537	7.30724e-05	7.94877e-06	0.00105837	0.000398647
32231			level4			843.659	103.8	NEG													0.00310721	0.00143178	0.000251611	1.27469e-05	0.000178239	0.000565033	0.00320393	0.000822925	0.00130829	0.00181582	0.00080027	0.00734559	0.00252237	0.00515502	0.00485824	0.0183801	0.00471536	0.0054379	0.00198272	0.00151869	0.00327069	0.00217923	0.0197914	0.00240569	0.0074942	8.15558e-06	0.00103567	0.00237446	0.00163387
32245			level4	(R)-3-Amino-2-fluoropropyl phosphenite	-19.5835	138.056	103.6	NEG													0.00333341	0.00131241	0.00241349	0.00333233	0.00116084	0.00185966	0.00117715	0.00162525	0.000766684	0.00106027	0.00164126	0.00293808	0.00258033	0.00111888	0.00141375	0.00209033	0.000645933	0.00393388	0.00119337	0.000869071	0.00182332	0.00110997	0.00304135	0.00228458	0.00237967	0.001238	0.00283666	0.00150794	0.00400858
32315			level4			1123.71	103	NEG													0.00306508	8.89294e-06	8.20531e-06	1.27469e-05	8.45926e-06	7.27723e-06	0.000486377	0.00218274	8.21932e-06	0.00032718	8.53913e-06	8.28813e-06	0.000911618	0.0113334	0.0017166	0.00216723	7.78735e-06	0.0082047	0.000320317	0.00239798	0.00165958	0.00191356	0.00497125	0.000165361	0.00357751	8.62298e-05	0.000161809	8.51141e-06	0.000347442
32316			level4			1124.71	103	NEG													0.00177194	8.89294e-06	8.20531e-06	1.27469e-05	8.45926e-06	7.27723e-06	8.24451e-06	0.000260294	8.21932e-06	8.6553e-06	8.53913e-06	8.28813e-06	0.000174964	0.00671345	0.000922966	0.000692086	0.000115689	0.00512508	0.000206281	0.00142589	0.000874809	0.000795598	0.00306308	7.83232e-06	0.00180429	8.15558e-06	7.94877e-06	8.51141e-06	8.48302e-06
32318			level4			1183.73	103	NEG													0.00105838	8.89294e-06	8.20531e-06	1.27469e-05	8.45926e-06	7.27723e-06	9.42457e-05	0.000847409	8.21932e-06	8.6553e-06	8.53913e-06	8.28813e-06	0.000128533	0.00533158	0.000673704	0.000308563	7.78735e-06	0.00469438	0.000104145	0.0006576	0.000699281	0.000312864	0.00202232	7.83232e-06	0.00170695	8.15558e-06	7.94877e-06	8.51141e-06	8.48302e-06
32364			level4	Ferric Maltol	0.641534	430.147	102.3	NEG													0.0167326	0.00408352	0.00596134	0.0148164	0.00832641	0.000694616	0.00104576	0.00685058	0.00144721	0.00647602	0.000102649	0.00122773	0.00778514	0.0184168	0.00253434	0.0256413	9.21313e-05	0.00277091	0.00496058	0.0160598	0.00730129	0.00489009	0.0624575	0.00250178	0.0114923	8.3225e-05	0.00414573	0.00405006	0.00425481
32368			level4			521.272	102.3	NEG													0.00357407	0.000632423	0.00515926	1.27469e-05	0.002068	0.000299453	0.000611032	0.0038733	0.000481932	0.000416384	8.53913e-06	0.000880966	0.00117996	0.00589592	0.00158235	0.00369954	0.000649777	0.00364281	0.00153206	0.00304218	0.00196214	0.00245089	0.00421003	0.000658925	0.00221973	0.00037311	0.00201161	0.00140568	0.0034766
32389			level4			155.054	101.8	NEG													0.0147327	0.00720403	0.0150935	0.00290006	0.0164435	0.000402976	0.00377898	0.021846	0.00204153	0.00584461	0.00107861	0.00288464	0.00641241	0.0122431	0.00623988	0.02451	0.00248278	0.0102385	0.00547689	0.014034	0.00879443	0.0119092	0.0221235	0.00292136	0.0114337	0.00139535	0.0112124	0.0102736	0.00836268
32395			level4			110.061	101.7	NEG													0.0420283	0.00802703	0.0370588	0.000846529	0.0356769	0.00205999	0.0119741	0.0590716	0.00583536	0.0153961	0.00619938	0.0122938	0.0218129	0.0456592	0.0138462	0.052593	0.00661245	0.0302407	0.0157444	0.0502396	0.0236608	0.0330403	0.0560672	0.00666157	0.0218265	0.00388403	0.0323472	0.0288247	0.0261823
32413			level4			152.072	101.6	NEG													0.0554971	0.0131684	0.0799164	0.00249813	0.0563164	0.0143054	0.0146915	0.108189	0.0162083	0.0217908	0.0102113	0.0244117	0.0321901	0.113364	0.0342764	0.116714	0.0110124	0.0550769	0.0392111	0.0883594	0.0453704	0.0589562	0.108865	0.0289946	0.0606943	0.0130853	0.0440919	0.0425181	0.0588632
32422			level4			264.098	101.6	NEG													0.0936646	0.0217565	0.0591716	0.00992125	0.0434987	0.0069572	0.0131041	0.083967	0.0202013	0.0145909	0.0077255	0.019445	0.0502259	0.0944944	0.0216226	0.094437	0.0174175	0.0700306	0.0282876	0.0759579	0.0423239	0.0469162	0.112607	0.0258234	0.0547121	0.00962078	0.0569031	0.0461219	0.0471963
32441			level4	O-Phospho-L-serine	-20.1186	184.061	101.4	NEG													0.120121	0.0285111	0.0921804	0.113039	0.0735757	0.0652145	0.0206336	0.142977	0.0180163	0.093096	0.117706	0.0479503	0.0403372	0.107589	0.115382	0.168678	0.0863478	0.141614	0.0434876	0.129207	0.0882832	0.0896559	0.144258	0.0930721	0.0931683	0.0874435	0.0717445	0.0677083	0.0594074
32443			level4			525.194	101.4	NEG													0.0871836	0.00701988	0.17003	0.00156449	0.107436	0.00021604	0.00453375	0.18407	0.00307264	0.0105268	0.000960387	0.00498026	0.022293	0.194161	0.0142832	0.106314	0.0036878	0.0956644	0.022324	0.126532	0.0583426	0.0600525	0.106913	0.00828986	0.0561826	0.00266943	0.0562005	0.0339636	0.0590958
32447			level4			166.051	101.3	NEG													0.0320669	0.0106576	0.0252463	0.0022646	0.0203039	0.00446687	0.0062491	0.0414064	0.00604081	0.0124251	0.00357843	0.00502927	0.0177043	0.0315269	0.00989022	0.0278124	0.00612436	0.0343368	0.011692	0.0345004	0.0171661	0.0249789	0.0311196	0.012549	0.0251288	0.00460708	0.0172468	0.0208457	0.0241518
32448			level4			200.093	101.3	NEG													0.0263656	0.0251407	0.0231337	0.0265015	0.019392	0.0192741	0.00588197	0.0248713	0.00612649	0.019346	0.0267992	0.0201995	0.00989803	0.024533	0.0226242	0.0459844	0.00659673	0.0205817	0.0118358	0.0303406	0.0207713	0.0231025	0.0298767	0.0191781	0.0222038	0.018922	0.0162328	0.016983	0.0141911
32457			level4	Sulfluramid	12.0953	526.197	101.1	NEG													0.0177013	0.000699341	0.0357558	0.000654824	0.0238323	7.27723e-06	0.00100936	0.0410546	7.05433e-05	0.00182642	9.28509e-05	0.000570186	0.00440323	0.0453336	0.00297277	0.0238658	0.000436987	0.0214047	0.00528421	0.0297021	0.0128339	0.0125525	0.0243528	0.00109173	0.0108906	0.000476352	0.0125659	0.00730855	0.0113442
32472			level4	dTDP-D-galacturote	6.7033	577.309	101	NEG													0.00482482	8.89294e-06	0.000211386	1.27469e-05	0.000400391	7.27723e-06	8.24451e-06	0.00438286	8.53393e-05	0.000130894	8.53913e-06	0.00163001	0.000710292	0.00167125	7.9958e-06	0.000878595	7.78735e-06	0.00128887	0.000119676	8.15532e-06	0.0008202	8.46404e-06	0.0070985	7.83232e-06	0.00248013	8.15558e-06	7.94877e-06	0.000521838	8.48302e-06
32473			level4			585.215	101	NEG													0.0222442	0.00105982	0.0437397	0.0230858	0.029297	7.27723e-06	0.00110477	0.0499965	0.000280278	0.00189976	8.53913e-06	0.000619128	0.00686823	0.0543867	0.00365267	0.0318435	0.000380121	0.0247089	0.00606751	0.0387311	0.0169991	0.0161065	0.0299616	0.00190133	0.0159448	0.000508646	0.0155796	0.00886723	0.0167813
32475			level4			1029.73	101	NEG													0.00644918	8.89294e-06	8.20531e-06	1.27469e-05	0.000203867	0.000502999	0.0093321	0.00209916	0.00220946	0.00314435	8.53913e-06	0.00520184	0.00631756	0.0136403	0.0101619	0.016811	0.00500008	0.0133824	0.00279379	0.00565637	0.00514724	0.00331245	0.0278115	0.00496609	0.0119616	8.15558e-06	0.000366083	0.000303207	0.0015856
32513			level4			444.151	100.3	NEG													0.00791118	0.00789088	0.0108976	1.27469e-05	0.00647019	0.00373316	0.00303886	0.0107484	0.00190945	0.00607621	0.000658982	0.00758426	0.00151749	0.00922306	0.000991422	0.0286406	7.78735e-06	0.0174979	0.00220748	0.00765167	0.00673347	0.0154467	0.0206173	0.00527412	0.0213683	0.00118215	0.00468214	0.00759755	0.00398736
32523			level4	Acyclovir triphosphate	-20.6891	464.127	100.2	NEG													0.00372563	0.000508276	0.00216087	1.27469e-05	0.00341521	0.00121328	6.78238e-05	0.00139783	0.000203996	0.000929029	8.53913e-06	0.00245054	0.00208425	0.00324586	0.000589916	0.0072173	9.43063e-05	0.00791057	0.00110221	0.00178731	0.00200627	0.00330192	0.00141181	7.83232e-06	0.000869498	8.66209e-05	0.00126156	0.00320702	0.0050108
32565			level4			364.124	99.6	NEG													0.0128294	0.00143055	0.00680271	0.00632881	0.00609041	0.00860821	0.00158331	0.0123129	0.0014897	0.00156792	0.000593207	0.00246119	0.00253537	0.0127993	0.00157824	0.0294824	0.00118999	0.010401	0.00347866	0.0106536	0.00671085	0.00519673	0.0162578	0.00231848	0.011149	0.00145436	0.00545124	0.00796294	0.00337379
32566			level4	N-Acetyl-D-glucosamine 1,6-bisphosphate	-10.8178	380.156	99.6	NEG													0.00124211	0.000660014	0.00123016	1.27469e-05	0.00173943	0.000108014	0.000871383	0.0018783	0.000361602	0.000557362	8.53913e-06	0.000318	0.000495804	0.005938	0.000927191	0.00642576	9.86352e-05	0.00731952	0.000350545	0.00248554	0.00165143	0.00125757	0.00189689	0.000453697	0.0012691	0.000863549	0.00184077	0.0023415	0.000803044
32573			level4			519.256	99.6	NEG													0.00214371	8.89294e-06	0.00294334	1.27469e-05	0.000171988	7.27723e-06	0.000120934	0.000235737	8.21932e-06	8.6553e-06	8.53913e-06	8.28813e-06	8.05552e-06	0.00160096	0.000126092	0.000368788	7.78735e-06	0.00132227	0.000152305	8.15532e-06	0.000463637	0.00016404	0.000262985	7.83232e-06	8.43779e-06	8.15558e-06	0.00059039	8.51141e-06	0.00219804
32579			level4			445.154	99.5	NEG													0.00217052	0.00034302	0.00319287	1.27469e-05	0.00275323	0.00558004	0.000346285	0.00257139	0.000268435	0.000900697	0.000457553	0.00138491	0.000976828	0.00322651	0.000801645	0.00470222	0.000322958	0.00112736	0.000915841	0.00150008	0.00167776	0.00251301	0.00478614	0.00055984	0.0038631	0.000197792	0.00088871	0.00071975	0.00117839
32808			level4	3,5-Dichloro-2-hydroxybenzenesulfonic acid	6.48673	242.044	95	NEG													0.00475734	0.00461516	0.00436068	0.00268078	0.00553074	0.00550002	0.00559167	0.00546536	0.00599907	0.0050302	0.00601136	0.00482147	0.00543518	0.00440966	0.0058281	0.0035743	0.00535502	0.00454205	0.00500533	0.00576687	0.00501402	0.0042024	0.00387927	0.00456026	0.00449971	0.00420916	0.00592098	0.00464184	0.00591947
32835			level4			257.015	94.9	NEG													0.0111177	0.0107791	0.0114	0.00645706	0.0160809	0.00890339	0.0146716	0.0136712	0.0137271	0.00997157	0.0138999	0.0115465	0.0115942	0.01025	0.0162973	0.00833447	0.0124036	0.0120671	0.0121985	0.014674	0.0120023	0.0112819	0.00791539	0.00950547	0.011884	0.0106934	0.0107494	0.0122986	0.013796
32837			level4			259.012	94.9	NEG													0.00688648	0.00648955	0.00567943	0.02025	0.00850483	0.00496426	0.00781951	0.00593964	0.00599827	0.0060875	0.00782524	0.00868924	0.0138942	0.0109087	0.00950956	0.0106846	0.00485149	0.0066595	0.00659301	0.00676013	0.00824975	0.00557847	0.00645281	0.00632239	0.00721216	0.00486671	0.00554035	0.00800256	0.00623645
32887			level4			363.108	94.3	NEG													0.00437198	0.00292556	0.00236983	0.00400702	0.00168266	0.00294535	0.00254351	0.001699	0.00138976	0.00223178	0.00329722	0.00280163	0.00428972	0.00321191	0.00199113	0.0028779	0.00128984	0.0144746	0.00172405	0.00330149	0.0032713	0.00508412	0.00537675	0.00342096	0.00405572	0.00651691	0.002582	0.00647237	0.00297845
32913			level4			252.978	93.4	NEG													0.00103634	0.000721339	0.00138979	0.00290718	0.00132363	0.000360389	0.00129263	0.00151166	0.00124691	0.00103781	0.0013289	0.00141378	0.000441488	0.00139448	0.00127493	0.00372431	0.000514889	0.00338094	0.00123173	0.00187894	0.0014706	0.00179198	0.00461361	0.00119652	0.000905045	0.00188889	0.00137887	0.00122816	0.000768279
32926			level4			105.001	92.7	NEG													0.00638963	0.00166517	0.00220186	0.00401874	0.00226086	0.00137217	0.00665292	0.00179292	0.00241152	0.00298765	0.00356718	0.00280059	0.00402534	0.00770159	0.0039985	0.0113688	0.00296175	0.0090919	0.00268479	0.00289508	0.00414245	0.0019137	0.00412243	0.00665146	0.0580049	0.00323217	0.00239761	0.00411347	0.00273637
32966			level4			222.016	90.9	NEG													0.00261555	0.00204337	0.00356347	0.00146323	0.00125011	0.00130107	0.00117877	0.00260651	0.00213363	0.00139017	0.00242622	0.00395107	0.00161852	0.00134677	0.0023499	0.00335839	0.000689746	0.00637779	0.00160766	0.00138886	0.00223304	0.00215113	0.00302614	0.00586354	0.0056261	0.00181646	0.00135438	0.00116557	0.00283369
32974			level4	Tetrasul sulfoxide	19.9288	339.039	90.7	NEG													0.000691781	0.00322972	0.00107139	0.000817959	0.000518894	0.00248374	0.00164007	0.00103622	0.00154342	0.00213964	0.000936049	0.00231393	0.000399781	0.000657938	0.000663176	0.00198626	0.000236942	0.000789358	0.000540156	0.000681135	0.00121888	0.00361389	0.000699703	0.00228889	0.00515657	0.00120405	0.000587937	0.00136655	0.000424691
32993			level4			282.002	90.3	NEG													0.000756364	0.00582681	0.0017985	0.000676854	0.00180021	0.0016164	0.00336343	0.00174585	0.00297877	0.00413175	0.0019434	0.00396826	0.000559252	0.00205515	0.000528841	0.00247277	0.000887208	0.00105697	0.00072133	0.00188953	0.00203888	0.00493062	0.00109366	0.00243087	0.00794523	0.00191237	0.000670084	0.00281076	0.00131606
32998			level4			242.014	90.2	NEG													0.00337864	0.00515532	0.0023596	0.00801282	0.00282045	0.00180067	0.00325244	0.00184919	0.00155696	0.00177013	0.0041775	0.00253641	0.00520255	0.00513998	0.00665462	0.000910957	0.00151551	0.0173777	0.00175144	0.00371778	0.00404704	0.00745772	0.00577286	0.00292243	0.00425147	0.0110536	0.00660437	0.0119133	0.00461364
33008			level4			419.02	90.1	NEG													0.00117369	0.00181491	0.00100127	1.27469e-05	0.000580628	0.00070148	0.00100034	0.000716192	0.000562004	0.000993349	0.0010799	0.000194747	0.0011035	0.00130679	0.000497992	0.00144	0.000326312	0.00340719	0.000745135	0.000925729	0.000979195	0.00173754	0.00093008	0.000945652	0.000756843	0.00314036	0.000386736	0.00172648	0.00123352
33011			level4			337.017	90	NEG													0.00307414	0.00161121	0.00170284	0.0033568	0.00202282	0.00771525	0.00171571	0.00158255	0.000934529	0.000850346	0.0022427	0.00169797	0.00218189	0.00292522	0.00177891	0.000609486	0.00069063	0.00853716	0.00137458	0.00265998	0.00246324	0.00381525	0.00368867	0.00200401	0.00217503	0.00504088	0.000745881	0.00473859	0.00259795
33022			level4			315.947	89.8	NEG													0.00143703	8.89294e-06	0.00038998	1.27469e-05	0.000651007	9.31404e-05	0.000582907	0.000379477	0.000390293	0.000432006	0.000828993	0.000396953	0.000812291	0.000775734	0.000370861	0.00085317	0.000227064	0.00439403	8.56493e-05	0.00104644	0.000708433	0.00159273	0.00150384	0.000615263	0.000909971	0.00188566	8.02128e-05	0.00251114	0.000839956
33024			level4			397.03	89.8	NEG													0.00239638	0.00203304	0.00165045	0.00251577	0.00104546	0.00122381	0.00130942	0.00142582	0.000716222	0.00150313	0.00136793	0.000647822	0.00245584	0.00224509	0.00180463	0.00250123	0.00064982	0.00837401	0.00216109	0.00174738	0.00198872	0.00339333	0.0040085	0.00208508	0.00255231	0.00371698	0.00123014	0.00374336	0.00248138
33030			level4			321.043	89.7	NEG													0.00735701	0.0106853	0.00385405	0.0151062	0.00324853	0.00452218	0.00361401	0.00288956	0.00248503	0.00825358	0.00446308	0.00486447	0.00661943	0.00655266	0.00328973	0.00318583	0.00202689	0.0186826	0.00323862	0.00496984	0.00599543	0.00937172	0.00881571	0.00601291	0.00609379	0.00902463	0.00297306	0.00863153	0.00567906
[truncated: 337 more rows]
[truncated: 30 more columns]
