# Supplementary material for: Identification of Potential Biomarkers for Breast Cancer Based on Salivary Metabolomics
Source: Research Square preprint supplement (doi:10.21203/rs.3.rs-6531859/v1), 2025-05-16
Supplement: Supplementary file 6 [file 72680f9175da1f854a62ee88.xlsx]

## Sheet: NC_vs_BC
ID	MS2 name	VIP	P-Value	Fold_Change	Log_Foldchange	symbol	dem
415	2-Aminonicotinic acid	1.97535	0.000250411	4.36166	2.12488	***	up-regulated
1640	3-Hydroxy-5-[2-(4-hydroxyphenyl)ethyl]phenyl .beta.-D-glucopyranoside	1.72298	0.000962507	2.83201	1.50183	***	up-regulated
1594	Methyl 6-(acetyloxy)-1,3,7,11-tetrahydroxyabieta-8,11,13-trien-18-oate	1.85884	0.00253901	3.81166	1.93042	**	up-regulated
1801	Indolylmethyl-desulfoglucosinolate	1.67484	0.00551254	2.00113	1.00081	**	up-regulated
996	2-Hydroxy-6-methyl-4-(trifluoromethyl)nicotinonitrile	2.80812	0.00606013	1.58201	0.661761	**	up-regulated
1360	3-(Methylsulfanyl)aniline	1.73337	0.00649553	2.69183	1.42859	**	up-regulated
583	N-Acetyl-D-galactosamine 4-sulfate	1.72567	0.0106365	2.76156	1.46548	*	up-regulated
174	2-Methyl-3-hydroxybutyric acid	1.15082	0.0124411	1.63712	0.711157	*	up-regulated
607	PC(37:1)	1.63357	0.0139214	3.95278	1.98287	*	up-regulated
1384	S-(4-Fluorophenyl)mercapturic acid	1.50008	0.0162571	1.2413	0.311849	*	up-regulated
1549	6,8-Di-O-methylaverufin	2.49267	5.31693e-05	0.586054	-0.770893	***	down-regulated
1623	2,2'-Bipyridine-4,4'-dicarboxylic acid	2.99388	0.00145312	0.842742	-0.246837	**	down-regulated
1425	2-Bromo-5-(pyrrolidin-1-yl)pyrazine	1.28635	0.00898018	0.713422	-0.487172	**	down-regulated
1556	2-Phenyl-1,3-thiazole-4-carboxylic acid	1.41482	0.0104736	0.758607	-0.398576	*	down-regulated
44	1,7-Dimethylxanthine	2.34237	0.0122016	0.0298752	-5.06491	*	down-regulated
49	Theobromine	2.34237	0.0122016	0.0298752	-5.06491	*	down-regulated
114	Theophylline	2.34237	0.0122016	0.0298752	-5.06491	*	down-regulated
1388	Frangulin B	2.27393	0.0134173	0.608527	-0.716607	*	down-regulated
954	3.beta.,7.alpha.-Dihydroxy-5-cholestenoic acid	1.76368	0.017422	0.78807	-0.343605	*	down-regulated
1800	3-Hydroxyhept-4-enoylcarnitine	1.59247	0.0199956	0.804368	-0.314072	*	down-regulated
