# Supplementary material for: Identification of Potential Biomarkers for Breast Cancer Based on Salivary Metabolomics
Source: Research Square preprint supplement (doi:10.21203/rs.3.rs-6531859/v1), 2025-05-16
Supplement: Supplementary file 7 [file b38145ee20cdc858d92b5b6a.xlsx]

## Sheet: NCvsBC
name	1,7-Dimethylxanthine	Theobromine	Theophylline	2-Methyl-3-hydroxybutyric acid	2-Aminonicotinic acid	N-Acetyl-D-galactosamine 4-sulfate	PC(37:1)	3.beta.,7.alpha.-Dihydroxy-5-cholestenoic acid	2-Hydroxy-6-methyl-4-(trifluoromethyl)nicotinonitrile	3-(Methylsulfanyl)aniline	S-(4-Fluorophenyl)mercapturic acid	Frangulin B	2-Bromo-5-(pyrrolidin-1-yl)pyrazine	6,8-Di-O-methylaverufin	2-Phenyl-1,3-thiazole-4-carboxylic acid	Methyl 6-(acetyloxy)-1,3,7,11-tetrahydroxyabieta-8,11,13-trien-18-oate	2,2'-Bipyridine-4,4'-dicarboxylic acid	3-Hydroxy-5-[2-(4-hydroxyphenyl)ethyl]phenyl .beta.-D-glucopyranoside	3-Hydroxyhept-4-enoylcarnitine	Indolylmethyl-desulfoglucosinolate
1,7-Dimethylxanthine	1	1	1	-0.123538	-0.277043	-0.333476	-0.257919	0.231196	-0.292666	-0.229403	-0.157432	0.23094	0.250662	0.349099	0.194997	-0.215487	0.289507	-0.239392	0.199949	-0.335952
Theobromine	1	1	1	-0.123538	-0.277043	-0.333476	-0.257919	0.231196	-0.292666	-0.229403	-0.157432	0.23094	0.250662	0.349099	0.194997	-0.215487	0.289507	-0.239392	0.199949	-0.335952
Theophylline	1	1	1	-0.123538	-0.277043	-0.333476	-0.257919	0.231196	-0.292666	-0.229403	-0.157432	0.23094	0.250662	0.349099	0.194997	-0.215487	0.289507	-0.239392	0.199949	-0.335952
2-Methyl-3-hydroxybutyric acid	-0.123538	-0.123538	-0.123538	1	0.455135	0.487407	0.28669	-0.280031	0.595748	0.293605	-0.341074	-0.185264	-0.168701	-0.225647	-0.221463	0.646973	-0.410313	0.324084	0.0467002	0.241697
2-Aminonicotinic acid	-0.277043	-0.277043	-0.277043	0.455135	1	0.437121	0.383932	-0.165713	0.403996	0.851447	-0.0396995	-0.177751	-0.157005	-0.230428	-0.0830701	0.518057	-0.324255	0.597883	-0.162213	0.252796
N-Acetyl-D-galactosamine 4-sulfate	-0.333476	-0.333476	-0.333476	0.487407	0.437121	1	0.674294	-0.437207	0.55639	0.320242	-0.134466	-0.432682	-0.0279177	-0.249381	-0.0264663	0.646888	-0.471954	0.540937	-0.250662	0.44378
PC(37:1)	-0.257919	-0.257919	-0.257919	0.28669	0.383932	0.674294	1	-0.318364	0.4711	0.261846	-0.135064	-0.388628	0.166055	-0.00614702	0.260394	0.543072	-0.391189	0.492957	-0.096474	0.378639
3.beta.,7.alpha.-Dihydroxy-5-cholestenoic acid	0.231196	0.231196	0.231196	-0.280031	-0.165713	-0.437207	-0.318364	1	-0.357637	-0.13532	0.00145138	0.213097	-0.0659097	0.151541	0.130709	-0.376163	0.351917	-0.192009	0.535986	-0.158713
2-Hydroxy-6-methyl-4-(trifluoromethyl)nicotinonitrile	-0.292666	-0.292666	-0.292666	0.595748	0.403996	0.55639	0.4711	-0.357637	1	0.297106	-0.338769	-0.364467	-0.155041	-0.356356	-0.0724836	0.662256	-0.626313	0.616324	-0.0852898	0.415094
3-(Methylsulfanyl)aniline	-0.229403	-0.229403	-0.229403	0.293605	0.851447	0.320242	0.261846	-0.13532	0.297106	1	-0.10817	-0.166994	-0.174336	-0.197558	-0.151029	0.408094	-0.364979	0.473491	-0.167848	0.182703
S-(4-Fluorophenyl)mercapturic acid	-0.157432	-0.157432	-0.157432	-0.341074	-0.0396995	-0.134466	-0.135064	0.00145138	-0.338769	-0.10817	1	-0.0545548	-0.184581	-0.340391	-0.141211	-0.198071	0.0732519	-0.0549816	-0.341501	0.0233074
Frangulin B	0.23094	0.23094	0.23094	-0.185264	-0.177751	-0.432682	-0.388628	0.213097	-0.364467	-0.166994	-0.0545548	1	-0.0809357	0.133954	-0.0866559	-0.231281	0.292239	-0.229318	-0.0277469	-0.264407
2-Bromo-5-(pyrrolidin-1-yl)pyrazine	0.250662	0.250662	0.250662	-0.168701	-0.157005	-0.0279177	0.166055	-0.0659097	-0.155041	-0.174336	-0.184581	-0.0809357	1	0.830872	0.859046	0.0877657	0.346965	-0.111244	0.0447366	0.0178434
6,8-Di-O-methylaverufin	0.349099	0.349099	0.349099	-0.225647	-0.230428	-0.249381	-0.00614702	0.151541	-0.356356	-0.197558	-0.340391	0.133954	0.830872	1	0.733715	-0.0803381	0.531546	-0.310424	0.150773	-0.224708
2-Phenyl-1,3-thiazole-4-carboxylic acid	0.194997	0.194997	0.194997	-0.221463	-0.0830701	-0.0264663	0.260394	0.130709	-0.0724836	-0.151029	-0.141211	-0.0866559	0.859046	0.733715	1	0.15581	0.313071	0.0683856	0.119781	0.133527
Methyl 6-(acetyloxy)-1,3,7,11-tetrahydroxyabieta-8,11,13-trien-18-oate	-0.215487	-0.215487	-0.215487	0.646973	0.518057	0.646888	0.543072	-0.376163	0.662256	0.408094	-0.198071	-0.231281	0.0877657	-0.0803381	0.15581	1	-0.343123	0.701101	-0.184581	0.552634
2,2'-Bipyridine-4,4'-dicarboxylic acid	0.289507	0.289507	0.289507	-0.410313	-0.324255	-0.471954	-0.391189	0.351917	-0.626313	-0.364979	0.0732519	0.292239	0.346965	0.531546	0.313071	-0.343123	1	-0.32767	0.287629	-0.247503
3-Hydroxy-5-[2-(4-hydroxyphenyl)ethyl]phenyl .beta.-D-glucopyranoside	-0.239392	-0.239392	-0.239392	0.324084	0.597883	0.540937	0.492957	-0.192009	0.616324	0.473491	-0.0549816	-0.229318	-0.111244	-0.310424	0.0683856	0.701101	-0.32767	1	-0.120464	0.623581
3-Hydroxyhept-4-enoylcarnitine	0.199949	0.199949	0.199949	0.0467002	-0.162213	-0.250662	-0.096474	0.535986	-0.0852898	-0.167848	-0.341501	-0.0277469	0.0447366	0.150773	0.119781	-0.184581	0.287629	-0.120464	1	-0.07735
Indolylmethyl-desulfoglucosinolate	-0.335952	-0.335952	-0.335952	0.241697	0.252796	0.44378	0.378639	-0.158713	0.415094	0.182703	0.0233074	-0.264407	0.0178434	-0.224708	0.133527	0.552634	-0.247503	0.623581	-0.07735	1
