# Supplementary material for: Identification of Potential Biomarkers for Breast Cancer Based on Salivary Metabolomics
Source: Research Square preprint supplement (doi:10.21203/rs.3.rs-6531859/v1), 2025-05-16
Supplement: Supplementary file 8 [file c7f8d4e7ed3ab8f6d25ed7a0.xlsx]

## Sheet: NCvs_BC
Pathway	Description	#.compounds.(all)	Compounds.(all)	#.compounds.(dem)	Compounds.(dem)	Total	Percent	Rich_factor	p_value	up_nums	down_nums	DA_score
hsa01100	Metabolic pathways	164	C06337;C00387;C00109;C05842;C00020;C00099;C01879;C00299;C00147;C00106;C00407;C00208;C00475;C00362;C00417;C03196;C00270;C00864;C00253;C00954;C00178;C13747;C07480;C00785;C00294;C00993;C00163;C00180;C09099;C05629;C18043;C01083;C00140;C00439;C05828;C00183;C00123;C02376;C00212;C00334;C00025;C01042;C00089;C00296;C00245;C02067;C00642;C03519;C00262;C05123;C00041;C07130;C00408;C00319;C00300;C00979;C11457;…	12	C00270;C13747;C07480;C00163;C00140;C07130;C00319;C05235;C00550;C00350;C00157;C06162	3074	100	0.00390371	0.0113244	9	3	0.5
hsa00232	Caffeine metabolism	4	C13747;C07480;C07130;C00385	3	C13747;C07480;C07130	22	25	0.136364	2.22331e-05	0	3	-1
hsa01250	Biosynthesis of nucleotide sugars	11	C00270;C00140;C00137;C00103;C00043;C00052;C00357;C00636;C00275;C02713;C00267	2	C00270;C00140	200	16.6667	0.01	0.0981828	2	0	1
hsa00520	Amino sugar and nucleotide sugar metabolism	10	C00270;C00140;C00103;C00043;C00052;C00357;C00636;C00275;C02713;C00267	2	C00270;C00140	118	16.6667	0.0169492	0.0384786	2	0	1
hsa00640	Propanoate metabolism	4	C00109;C00099;C00163;C05235	2	C00163;C05235	41	16.6667	0.0487805	0.00512756	2	0	1
hsa00564	Glycerophospholipid metabolism	13	C00670;C06771;C00093;C00307;C00346;C00114;C00588;C00350;C04308;C02737;C00416;C04230;C00157	2	C00350;C00157	56	16.6667	0.0357143	0.0094164	2	0	1
hsa00600	Sphingolipid metabolism	7	C00319;C12144;C00346;C00836;C00550;C06125;C04737	2	C00319;C00550	35	16.6667	0.0571429	0.00375412	2	0	1
hsa04071	Sphingolipid signaling pathway	5	C00212;C00319;C00346;C00836;C00550	2	C00319;C00550	15	16.6667	0.133333	0.000682597	2	0	1
hsa04217	Necroptosis	3	C00319;C00219;C00550	2	C00319;C00550	10	16.6667	0.2	0.000294737	2	0	1
hsa04723	Retrograde endocannabinoid signaling	6	C00334;C00025;C00219;C00350;C00157;C00689	2	C00350;C00157	19	16.6667	0.105263	0.00110503	2	0	1
hsa00590	Arachidonic acid metabolism	2	C00219;C00157	1	C00157	79	8.33333	0.0126582	0.193122	1	0	1
hsa00591	Linoleic acid metabolism	5	C14766;C03242;C00219;C06426;C00157	1	C00157	28	8.33333	0.0357143	0.0728282	1	0	1
hsa00592	alpha-Linolenic acid metabolism	2	C06427;C00157	1	C00157	44	8.33333	0.0227273	0.112228	1	0	1
hsa00563	Glycosylphosphatidylinositol (GPI)-anchor biosynthesis	2	C00346;C00350	1	C00350	4	8.33333	0.25	0.0107154	1	0	1
hsa00760	Nicotinate and nicotinamide metabolism	11	C05842;C00253;C00163;C00334;C00745;C00022;C00153;C02918;C05843;C15987;C00232	1	C00163	55	8.33333	0.0181818	0.138419	1	0	1
hsa02010	ABC transporters	31	C00387;C00299;C00407;C00208;C00475;C00294;C01083;C00140;C00183;C00123;C00212;C00025;C00089;C00245;C00041;C00148;C00719;C00137;C05512;C00093;C01835;C00255;C00559;C00079;C05402;C00047;C00077;C00064;C00114;C00062;C00009	1	C00140	138	8.33333	0.00724638	0.314345	1	0	1
hsa04140	Autophagy - animal	1	C00350	1	C00350	6	8.33333	0.166667	0.0160335	1	0	1
hsa04136	Autophagy - other	1	C00350	1	C00350	3	8.33333	0.333333	0.00804645	1	0	1
hsa04210	Apoptosis	1	C00319	1	C00319	4	8.33333	0.25	0.0107154	1	0	1
hsa04973	Carbohydrate digestion and absorption	6	C00208;C00163;C12285;C00089;C01835;C00246	1	C00163	27	8.33333	0.037037	0.0703132	1	0	1
hsa04974	Protein digestion and absorption	17	C00099;C00407;C00163;C00183;C00123;C00025;C08262;C00041;C00148;C00079;C00047;C00246;C00064;C00062;C00388;C02632;C01746	1	C00163	47	8.33333	0.0212766	0.119443	1	0	1
hsa05231	Choline metabolism in cancer	8	C00670;C00093;C00307;C00114;C00588;C00416;C04230;C00157	1	C00157	11	8.33333	0.0909091	0.0292144	1	0	1
hsa05167	Kaposi sarcoma-associated herpesvirus infection	1	C00350	1	C00350	5	8.33333	0.2	0.0133777	1	0	1
hsa05130	Pathogenic Escherichia coli infection	1	C00350	1	C00350	3	8.33333	0.333333	0.00804645	1	0	1
